# Supplementary material for: Etiology Model for Elevated Histamine Levels Driving High Reactogenicity Vaccines (including COVID-19) Associated Menstrual Adverse Events
Source: Research Square preprint supplement (doi:10.21203/rs.3.rs-1508835/v1), 2022-04-01
Supplement: Supplementary file 1 [file afe8c256944dd5ef2da79241.xlsx]

## Sheet: Table1
VAERS Symptom	COVID19	HPV (GARDASIL)	HPV (CERVARIX)	All Vaccines	% COVID19
Heavy menstrual bleeding	9456	6		9539	0.991
Menstruation irregular	5467	258	118	6018	0.9084
Dysmenorrhoea	5032	157	97	5395	0.933
Menstrual disorder	4215	185	65	4633	0.91
Menstruation delayed	3115	106	4	3281	0.949
Intermenstrual bleeding	2489			2510	0.992
Premenstrual syndrome	319	4	2	331	0.964
Premenstrual pain	166			169	0.982
Menstrual discomfort	82	2	1	88	0.932
Total	30341	718	287	31964	0.949224

## Sheet: All_dysmenorrhoea
Dose report
Vaccine	All	1	2	3	4	5	6	7+	UNK	N/A
COVID19 (COVID19 (PFIZER-BIONTECH))	3982	2223	1388	39					330	2
COVID19 (COVID19 (MODERNA))	867	461	289	10					107
COVID19 (COVID19 (JANSSEN))	181	114	1						61	5
HPV (GARDASIL)	157	46	32	40	1				38
HPV (CERVARIX)	97	29	9	30					29
VACCINE NOT SPECIFIED (NO BRAND NAME)	27	6	4						17
HPV (NO BRAND NAME)	11	2	3	3					3
HPV (GARDASIL 9)	11	4	3						4
VARICELLA (VARIVAX)	6	3	3
HEP B (ENGERIX-B)	6	2		2					2
MENINGOCOCCAL CONJUGATE (MENACTRA)	6	6
HEP A (HAVRIX)	5	4		1
ANTHRAX (BIOTHRAX)	3	3
MEASLES + MUMPS + RUBELLA (MMR II)	3								3
TDAP (ADACEL)	3	2							1
ANTHRAX (NO BRAND NAME)	2	1	1
TD ADSORBED (NO BRAND NAME)	2								2
MENINGOCOCCAL (MENOMUNE)	2	1							1
INFLUENZA (SEASONAL) (FLUVIRIN)	2	1							1
INFLUENZA (SEASONAL) (FLUMIST QUADRIVALENT)	2								2
COVID19 (COVID19 (UNKNOWN))	2	2
INFLUENZA (SEASONAL) (NO BRAND NAME)	2	1							1
HEP B (RECOMBIVAX HB)	1								1
TDAP (BOOSTRIX)	1	1
HEP A (VAQTA)	1	1
RABIES (RABAVERT)	1	1
TYPHOID VI POLYSACCHARIDE (TYPHIM VI)	1	1
YELLOW FEVER (YF-VAX)	1	1
TDAP + IPV (FOREIGN)	1								1
TYPHOID LIVE ORAL TY21A (VIVOTIF)	1								1
MENINGOCOCCAL B (TRUMENBA)	1								1
DTAP (DAPTACEL)	1					1
EBOLA ZAIRE (ERVEBO)	1								1
MEASLES + MUMPS + RUBELLA (PRIORIX)	1								1
MENINGOCOCCAL CONJUGATE (NO BRAND NAME)	1								1
VACCINE NOT SPECIFIED (FOREIGN)	1	1
DTAP + IPV + HIB (INFANRIX QUINTA)	1								1
INFLUENZA (SEASONAL) (FLUCELVAX QUADRIVALENT)	1								1
Total	5395
COVID-19	5032
COVID-19 %	0.932715
Age report
ANTHRAX (BIOTHRAX)	Age	All	1	2	3	All Male	1 Male	2 Male	3 Male	All Female	1 Female	2 Female	3 Female	ANTHRAX (NO BRAND NAME)	Age	All	1	2	3	All Male	1 Male	2 Male	3 Male	All Female	1 Female	2 Female	3 Female	COVID19 (COVID19 (JANSSEN))	Age	All	1	2	3	All Male	1 Male	2 Male	3 Male	All Female	1 Female	2 Female	3 Female	COVID19 (COVID19 (MODERNA))	Age	All	1	2	3	All Male	1 Male
ANTHRAX (BIOTHRAX)	0													ANTHRAX (NO BRAND NAME)	0													COVID19 (COVID19 (JANSSEN))	0	24								24				COVID19 (COVID19 (MODERNA))	0	53	42	8
ANTHRAX (BIOTHRAX)	1													ANTHRAX (NO BRAND NAME)	1													COVID19 (COVID19 (JANSSEN))	1													COVID19 (COVID19 (MODERNA))	1
ANTHRAX (BIOTHRAX)	2													ANTHRAX (NO BRAND NAME)	2													COVID19 (COVID19 (JANSSEN))	2													COVID19 (COVID19 (MODERNA))	2
ANTHRAX (BIOTHRAX)	3													ANTHRAX (NO BRAND NAME)	3													COVID19 (COVID19 (JANSSEN))	3													COVID19 (COVID19 (MODERNA))	3
ANTHRAX (BIOTHRAX)	4													ANTHRAX (NO BRAND NAME)	4													COVID19 (COVID19 (JANSSEN))	4													COVID19 (COVID19 (MODERNA))	4
ANTHRAX (BIOTHRAX)	5													ANTHRAX (NO BRAND NAME)	5													COVID19 (COVID19 (JANSSEN))	5													COVID19 (COVID19 (MODERNA))	5
ANTHRAX (BIOTHRAX)	6													ANTHRAX (NO BRAND NAME)	6													COVID19 (COVID19 (JANSSEN))	6													COVID19 (COVID19 (MODERNA))	6
ANTHRAX (BIOTHRAX)	7													ANTHRAX (NO BRAND NAME)	7													COVID19 (COVID19 (JANSSEN))	7													COVID19 (COVID19 (MODERNA))	7
ANTHRAX (BIOTHRAX)	8													ANTHRAX (NO BRAND NAME)	8													COVID19 (COVID19 (JANSSEN))	8													COVID19 (COVID19 (MODERNA))	8
ANTHRAX (BIOTHRAX)	9													ANTHRAX (NO BRAND NAME)	9													COVID19 (COVID19 (JANSSEN))	9													COVID19 (COVID19 (MODERNA))	9
ANTHRAX (BIOTHRAX)	10													ANTHRAX (NO BRAND NAME)	10													COVID19 (COVID19 (JANSSEN))	10													COVID19 (COVID19 (MODERNA))	10
ANTHRAX (BIOTHRAX)	11													ANTHRAX (NO BRAND NAME)	11													COVID19 (COVID19 (JANSSEN))	11													COVID19 (COVID19 (MODERNA))	11
ANTHRAX (BIOTHRAX)	12													ANTHRAX (NO BRAND NAME)	12													COVID19 (COVID19 (JANSSEN))	12													COVID19 (COVID19 (MODERNA))	12
ANTHRAX (BIOTHRAX)	13													ANTHRAX (NO BRAND NAME)	13													COVID19 (COVID19 (JANSSEN))	13													COVID19 (COVID19 (MODERNA))	13
ANTHRAX (BIOTHRAX)	14													ANTHRAX (NO BRAND NAME)	14													COVID19 (COVID19 (JANSSEN))	14													COVID19 (COVID19 (MODERNA))	14
ANTHRAX (BIOTHRAX)	15													ANTHRAX (NO BRAND NAME)	15													COVID19 (COVID19 (JANSSEN))	15													COVID19 (COVID19 (MODERNA))	15
ANTHRAX (BIOTHRAX)	16													ANTHRAX (NO BRAND NAME)	16													COVID19 (COVID19 (JANSSEN))	16													COVID19 (COVID19 (MODERNA))	16
ANTHRAX (BIOTHRAX)	17													ANTHRAX (NO BRAND NAME)	17													COVID19 (COVID19 (JANSSEN))	17													COVID19 (COVID19 (MODERNA))	17
ANTHRAX (BIOTHRAX)	18													ANTHRAX (NO BRAND NAME)	18													COVID19 (COVID19 (JANSSEN))	18	3	3							3	3			COVID19 (COVID19 (MODERNA))	18	8	6	1
ANTHRAX (BIOTHRAX)	19													ANTHRAX (NO BRAND NAME)	19													COVID19 (COVID19 (JANSSEN))	19													COVID19 (COVID19 (MODERNA))	19	5	2	2
ANTHRAX (BIOTHRAX)	20													ANTHRAX (NO BRAND NAME)	20													COVID19 (COVID19 (JANSSEN))	20													COVID19 (COVID19 (MODERNA))	20	13	8	4
ANTHRAX (BIOTHRAX)	21	1	1							1	1			ANTHRAX (NO BRAND NAME)	21													COVID19 (COVID19 (JANSSEN))	21	4	4							4	4			COVID19 (COVID19 (MODERNA))	21	10	5	4
ANTHRAX (BIOTHRAX)	22	1	1							1	1			ANTHRAX (NO BRAND NAME)	22	1	1							1	1			COVID19 (COVID19 (JANSSEN))	22	5	4							5	4			COVID19 (COVID19 (MODERNA))	22	17	11	5
ANTHRAX (BIOTHRAX)	23													ANTHRAX (NO BRAND NAME)	23													COVID19 (COVID19 (JANSSEN))	23	2	2							2	2			COVID19 (COVID19 (MODERNA))	23	16	10	3
ANTHRAX (BIOTHRAX)	24													ANTHRAX (NO BRAND NAME)	24													COVID19 (COVID19 (JANSSEN))	24	2	1							2	1			COVID19 (COVID19 (MODERNA))	24	21	15	4		1
ANTHRAX (BIOTHRAX)	25													ANTHRAX (NO BRAND NAME)	25													COVID19 (COVID19 (JANSSEN))	25	3	3							3	3			COVID19 (COVID19 (MODERNA))	25	21	12	9
ANTHRAX (BIOTHRAX)	26													ANTHRAX (NO BRAND NAME)	26													COVID19 (COVID19 (JANSSEN))	26	3	2							3	2			COVID19 (COVID19 (MODERNA))	26	33	21	9	1
ANTHRAX (BIOTHRAX)	27													ANTHRAX (NO BRAND NAME)	27	1		1										COVID19 (COVID19 (JANSSEN))	27	2	1							2	1			COVID19 (COVID19 (MODERNA))	27	27	19	6		1	1
ANTHRAX (BIOTHRAX)	28													ANTHRAX (NO BRAND NAME)	28													COVID19 (COVID19 (JANSSEN))	28	1	1							1	1			COVID19 (COVID19 (MODERNA))	28	25	13	7
ANTHRAX (BIOTHRAX)	29													ANTHRAX (NO BRAND NAME)	29													COVID19 (COVID19 (JANSSEN))	29	6	6							6	6			COVID19 (COVID19 (MODERNA))	29	42	23	13	1
ANTHRAX (BIOTHRAX)	30													ANTHRAX (NO BRAND NAME)	30													COVID19 (COVID19 (JANSSEN))	30	5	4							5	4			COVID19 (COVID19 (MODERNA))	30	39	22	11
ANTHRAX (BIOTHRAX)	31													ANTHRAX (NO BRAND NAME)	31													COVID19 (COVID19 (JANSSEN))	31	3	3							3	3			COVID19 (COVID19 (MODERNA))	31	39	19	14
ANTHRAX (BIOTHRAX)	32													ANTHRAX (NO BRAND NAME)	32													COVID19 (COVID19 (JANSSEN))	32	10	5							10	5			COVID19 (COVID19 (MODERNA))	32	32	18	11
ANTHRAX (BIOTHRAX)	33													ANTHRAX (NO BRAND NAME)	33													COVID19 (COVID19 (JANSSEN))	33	5	2							5	2			COVID19 (COVID19 (MODERNA))	33	31	16	13
ANTHRAX (BIOTHRAX)	34													ANTHRAX (NO BRAND NAME)	34													COVID19 (COVID19 (JANSSEN))	34	10	4							10	4			COVID19 (COVID19 (MODERNA))	34	26	13	6	1
ANTHRAX (BIOTHRAX)	35	1	1							1	1			ANTHRAX (NO BRAND NAME)	35													COVID19 (COVID19 (JANSSEN))	35	4	3							4	3			COVID19 (COVID19 (MODERNA))	35	34	20	7	1
ANTHRAX (BIOTHRAX)	36													ANTHRAX (NO BRAND NAME)	36													COVID19 (COVID19 (JANSSEN))	36	12	8							12	8			COVID19 (COVID19 (MODERNA))	36	33	19	10	2
ANTHRAX (BIOTHRAX)	37													ANTHRAX (NO BRAND NAME)	37													COVID19 (COVID19 (JANSSEN))	37	6	4							6	4			COVID19 (COVID19 (MODERNA))	37	33	14	12
ANTHRAX (BIOTHRAX)	38													ANTHRAX (NO BRAND NAME)	38													COVID19 (COVID19 (JANSSEN))	38	6	6							6	6			COVID19 (COVID19 (MODERNA))	38	27	13	9
ANTHRAX (BIOTHRAX)	39													ANTHRAX (NO BRAND NAME)	39													COVID19 (COVID19 (JANSSEN))	39	9	9							9	9			COVID19 (COVID19 (MODERNA))	39	28	12	12
ANTHRAX (BIOTHRAX)	40													ANTHRAX (NO BRAND NAME)	40													COVID19 (COVID19 (JANSSEN))	40	6	6							6	6			COVID19 (COVID19 (MODERNA))	40	32	14	14	1
ANTHRAX (BIOTHRAX)	41													ANTHRAX (NO BRAND NAME)	41													COVID19 (COVID19 (JANSSEN))	41	11	8							11	8			COVID19 (COVID19 (MODERNA))	41	25	12	11
ANTHRAX (BIOTHRAX)	42													ANTHRAX (NO BRAND NAME)	42													COVID19 (COVID19 (JANSSEN))	42	6	5							6	5			COVID19 (COVID19 (MODERNA))	42	25	12	10
ANTHRAX (BIOTHRAX)	43													ANTHRAX (NO BRAND NAME)	43													COVID19 (COVID19 (JANSSEN))	43	2	1			1	1			1				COVID19 (COVID19 (MODERNA))	43	17	11	3
ANTHRAX (BIOTHRAX)	44													ANTHRAX (NO BRAND NAME)	44													COVID19 (COVID19 (JANSSEN))	44	4	1							4	1			COVID19 (COVID19 (MODERNA))	44	16	8	6
ANTHRAX (BIOTHRAX)	45													ANTHRAX (NO BRAND NAME)	45													COVID19 (COVID19 (JANSSEN))	45	2	2							2	2			COVID19 (COVID19 (MODERNA))	45	20	9	7	1
ANTHRAX (BIOTHRAX)	46													ANTHRAX (NO BRAND NAME)	46													COVID19 (COVID19 (JANSSEN))	46	4	3							4	3			COVID19 (COVID19 (MODERNA))	46	8	2	5
ANTHRAX (BIOTHRAX)	47													ANTHRAX (NO BRAND NAME)	47													COVID19 (COVID19 (JANSSEN))	47	2								2				COVID19 (COVID19 (MODERNA))	47	19	7	8
ANTHRAX (BIOTHRAX)	48													ANTHRAX (NO BRAND NAME)	48													COVID19 (COVID19 (JANSSEN))	48	5	4	1						5	4	1		COVID19 (COVID19 (MODERNA))	48	11	3	8
ANTHRAX (BIOTHRAX)	49													ANTHRAX (NO BRAND NAME)	49													COVID19 (COVID19 (JANSSEN))	49	1	1							1	1			COVID19 (COVID19 (MODERNA))	49	18	5	10
ANTHRAX (BIOTHRAX)	50													ANTHRAX (NO BRAND NAME)	50													COVID19 (COVID19 (JANSSEN))	50	1								1				COVID19 (COVID19 (MODERNA))	50	20	5	12
ANTHRAX (BIOTHRAX)	51													ANTHRAX (NO BRAND NAME)	51													COVID19 (COVID19 (JANSSEN))	51	3	2							3	2			COVID19 (COVID19 (MODERNA))	51	12	2	8	1
ANTHRAX (BIOTHRAX)	52													ANTHRAX (NO BRAND NAME)	52													COVID19 (COVID19 (JANSSEN))	52	2	2							2	2			COVID19 (COVID19 (MODERNA))	52	6	4	1
ANTHRAX (BIOTHRAX)	53													ANTHRAX (NO BRAND NAME)	53													COVID19 (COVID19 (JANSSEN))	53	4	3							4	3			COVID19 (COVID19 (MODERNA))	53	8	4	2
ANTHRAX (BIOTHRAX)	54													ANTHRAX (NO BRAND NAME)	54													COVID19 (COVID19 (JANSSEN))	54	1	1							1	1			COVID19 (COVID19 (MODERNA))	54	2	1	1
ANTHRAX (BIOTHRAX)	55													ANTHRAX (NO BRAND NAME)	55													COVID19 (COVID19 (JANSSEN))	55													COVID19 (COVID19 (MODERNA))	55	2	1	1
ANTHRAX (BIOTHRAX)	56													ANTHRAX (NO BRAND NAME)	56													COVID19 (COVID19 (JANSSEN))	56	1								1				COVID19 (COVID19 (MODERNA))	56	2	1	1
ANTHRAX (BIOTHRAX)	57													ANTHRAX (NO BRAND NAME)	57													COVID19 (COVID19 (JANSSEN))	57													COVID19 (COVID19 (MODERNA))	57
ANTHRAX (BIOTHRAX)	58													ANTHRAX (NO BRAND NAME)	58													COVID19 (COVID19 (JANSSEN))	58													COVID19 (COVID19 (MODERNA))	58	1	1
ANTHRAX (BIOTHRAX)	59													ANTHRAX (NO BRAND NAME)	59													COVID19 (COVID19 (JANSSEN))	59													COVID19 (COVID19 (MODERNA))	59	4	3	1
ANTHRAX (BIOTHRAX)	60													ANTHRAX (NO BRAND NAME)	60													COVID19 (COVID19 (JANSSEN))	60													COVID19 (COVID19 (MODERNA))	60	1	1
ANTHRAX (BIOTHRAX)	61													ANTHRAX (NO BRAND NAME)	61													COVID19 (COVID19 (JANSSEN))	61													COVID19 (COVID19 (MODERNA))	61	1
ANTHRAX (BIOTHRAX)	62													ANTHRAX (NO BRAND NAME)	62													COVID19 (COVID19 (JANSSEN))	62													COVID19 (COVID19 (MODERNA))	62	1	1
ANTHRAX (BIOTHRAX)	63													ANTHRAX (NO BRAND NAME)	63													COVID19 (COVID19 (JANSSEN))	63													COVID19 (COVID19 (MODERNA))	63	1	1
ANTHRAX (BIOTHRAX)	64													ANTHRAX (NO BRAND NAME)	64													COVID19 (COVID19 (JANSSEN))	64													COVID19 (COVID19 (MODERNA))	64
ANTHRAX (BIOTHRAX)	65													ANTHRAX (NO BRAND NAME)	65													COVID19 (COVID19 (JANSSEN))	65													COVID19 (COVID19 (MODERNA))	65
ANTHRAX (BIOTHRAX)	66													ANTHRAX (NO BRAND NAME)	66													COVID19 (COVID19 (JANSSEN))	66													COVID19 (COVID19 (MODERNA))	66
ANTHRAX (BIOTHRAX)	67													ANTHRAX (NO BRAND NAME)	67													COVID19 (COVID19 (JANSSEN))	67													COVID19 (COVID19 (MODERNA))	67
ANTHRAX (BIOTHRAX)	68													ANTHRAX (NO BRAND NAME)	68													COVID19 (COVID19 (JANSSEN))	68													COVID19 (COVID19 (MODERNA))	68	1			1
ANTHRAX (BIOTHRAX)	69													ANTHRAX (NO BRAND NAME)	69													COVID19 (COVID19 (JANSSEN))	69	1								1				COVID19 (COVID19 (MODERNA))	69
ANTHRAX (BIOTHRAX)	70													ANTHRAX (NO BRAND NAME)	70													COVID19 (COVID19 (JANSSEN))	70													COVID19 (COVID19 (MODERNA))	70	1
ANTHRAX (BIOTHRAX)	71													ANTHRAX (NO BRAND NAME)	71													COVID19 (COVID19 (JANSSEN))	71													COVID19 (COVID19 (MODERNA))	71
ANTHRAX (BIOTHRAX)	72													ANTHRAX (NO BRAND NAME)	72													COVID19 (COVID19 (JANSSEN))	72													COVID19 (COVID19 (MODERNA))	72
ANTHRAX (BIOTHRAX)	73													ANTHRAX (NO BRAND NAME)	73													COVID19 (COVID19 (JANSSEN))	73													COVID19 (COVID19 (MODERNA))	73
ANTHRAX (BIOTHRAX)	74													ANTHRAX (NO BRAND NAME)	74													COVID19 (COVID19 (JANSSEN))	74													COVID19 (COVID19 (MODERNA))	74
ANTHRAX (BIOTHRAX)	75													ANTHRAX (NO BRAND NAME)	75													COVID19 (COVID19 (JANSSEN))	75													COVID19 (COVID19 (MODERNA))	75
ANTHRAX (BIOTHRAX)	76													ANTHRAX (NO BRAND NAME)	76													COVID19 (COVID19 (JANSSEN))	76													COVID19 (COVID19 (MODERNA))	76
ANTHRAX (BIOTHRAX)	77													ANTHRAX (NO BRAND NAME)	77													COVID19 (COVID19 (JANSSEN))	77													COVID19 (COVID19 (MODERNA))	77
ANTHRAX (BIOTHRAX)	78													ANTHRAX (NO BRAND NAME)	78													COVID19 (COVID19 (JANSSEN))	78													COVID19 (COVID19 (MODERNA))	78
ANTHRAX (BIOTHRAX)	79													ANTHRAX (NO BRAND NAME)	79													COVID19 (COVID19 (JANSSEN))	79													COVID19 (COVID19 (MODERNA))	79
ANTHRAX (BIOTHRAX)	80													ANTHRAX (NO BRAND NAME)	80													COVID19 (COVID19 (JANSSEN))	80													COVID19 (COVID19 (MODERNA))	80
ANTHRAX (BIOTHRAX)	81													ANTHRAX (NO BRAND NAME)	81													COVID19 (COVID19 (JANSSEN))	81													COVID19 (COVID19 (MODERNA))	81
ANTHRAX (BIOTHRAX)	82													ANTHRAX (NO BRAND NAME)	82													COVID19 (COVID19 (JANSSEN))	82													COVID19 (COVID19 (MODERNA))	82
ANTHRAX (BIOTHRAX)	83													ANTHRAX (NO BRAND NAME)	83													COVID19 (COVID19 (JANSSEN))	83													COVID19 (COVID19 (MODERNA))	83
ANTHRAX (BIOTHRAX)	84													ANTHRAX (NO BRAND NAME)	84													COVID19 (COVID19 (JANSSEN))	84													COVID19 (COVID19 (MODERNA))	84
ANTHRAX (BIOTHRAX)	85													ANTHRAX (NO BRAND NAME)	85													COVID19 (COVID19 (JANSSEN))	85													COVID19 (COVID19 (MODERNA))	85
ANTHRAX (BIOTHRAX)	86													ANTHRAX (NO BRAND NAME)	86													COVID19 (COVID19 (JANSSEN))	86													COVID19 (COVID19 (MODERNA))	86
ANTHRAX (BIOTHRAX)	87													ANTHRAX (NO BRAND NAME)	87													COVID19 (COVID19 (JANSSEN))	87													COVID19 (COVID19 (MODERNA))	87
ANTHRAX (BIOTHRAX)	88													ANTHRAX (NO BRAND NAME)	88													COVID19 (COVID19 (JANSSEN))	88													COVID19 (COVID19 (MODERNA))	88
ANTHRAX (BIOTHRAX)	89													ANTHRAX (NO BRAND NAME)	89													COVID19 (COVID19 (JANSSEN))	89													COVID19 (COVID19 (MODERNA))	89
ANTHRAX (BIOTHRAX)	90													ANTHRAX (NO BRAND NAME)	90													COVID19 (COVID19 (JANSSEN))	90													COVID19 (COVID19 (MODERNA))	90
ANTHRAX (BIOTHRAX)	91													ANTHRAX (NO BRAND NAME)	91													COVID19 (COVID19 (JANSSEN))	91													COVID19 (COVID19 (MODERNA))	91
ANTHRAX (BIOTHRAX)	92													ANTHRAX (NO BRAND NAME)	92													COVID19 (COVID19 (JANSSEN))	92													COVID19 (COVID19 (MODERNA))	92
ANTHRAX (BIOTHRAX)	93													ANTHRAX (NO BRAND NAME)	93													COVID19 (COVID19 (JANSSEN))	93													COVID19 (COVID19 (MODERNA))	93
ANTHRAX (BIOTHRAX)	94													ANTHRAX (NO BRAND NAME)	94													COVID19 (COVID19 (JANSSEN))	94													COVID19 (COVID19 (MODERNA))	94
ANTHRAX (BIOTHRAX)	95													ANTHRAX (NO BRAND NAME)	95													COVID19 (COVID19 (JANSSEN))	95													COVID19 (COVID19 (MODERNA))	95
ANTHRAX (BIOTHRAX)	96													ANTHRAX (NO BRAND NAME)	96													COVID19 (COVID19 (JANSSEN))	96													COVID19 (COVID19 (MODERNA))	96
ANTHRAX (BIOTHRAX)	97													ANTHRAX (NO BRAND NAME)	97													COVID19 (COVID19 (JANSSEN))	97													COVID19 (COVID19 (MODERNA))	97
ANTHRAX (BIOTHRAX)	98													ANTHRAX (NO BRAND NAME)	98													COVID19 (COVID19 (JANSSEN))	98													COVID19 (COVID19 (MODERNA))	98
ANTHRAX (BIOTHRAX)	99													ANTHRAX (NO BRAND NAME)	99													COVID19 (COVID19 (JANSSEN))	99													COVID19 (COVID19 (MODERNA))	99
ANTHRAX (BIOTHRAX)	100													ANTHRAX (NO BRAND NAME)	100													COVID19 (COVID19 (JANSSEN))	100													COVID19 (COVID19 (MODERNA))	100
ANTHRAX (BIOTHRAX)	101													ANTHRAX (NO BRAND NAME)	101													COVID19 (COVID19 (JANSSEN))	101													COVID19 (COVID19 (MODERNA))	101
ANTHRAX (BIOTHRAX)	102													ANTHRAX (NO BRAND NAME)	102													COVID19 (COVID19 (JANSSEN))	102													COVID19 (COVID19 (MODERNA))	102
ANTHRAX (BIOTHRAX)	103													ANTHRAX (NO BRAND NAME)	103													COVID19 (COVID19 (JANSSEN))	103													COVID19 (COVID19 (MODERNA))	103
ANTHRAX (BIOTHRAX)	104													ANTHRAX (NO BRAND NAME)	104													COVID19 (COVID19 (JANSSEN))	104													COVID19 (COVID19 (MODERNA))	104
ANTHRAX (BIOTHRAX)	105													ANTHRAX (NO BRAND NAME)	105													COVID19 (COVID19 (JANSSEN))	105													COVID19 (COVID19 (MODERNA))	105
ANTHRAX (BIOTHRAX)	106													ANTHRAX (NO BRAND NAME)	106													COVID19 (COVID19 (JANSSEN))	106													COVID19 (COVID19 (MODERNA))	106
ANTHRAX (BIOTHRAX)	107													ANTHRAX (NO BRAND NAME)	107													COVID19 (COVID19 (JANSSEN))	107													COVID19 (COVID19 (MODERNA))	107
ANTHRAX (BIOTHRAX)	108													ANTHRAX (NO BRAND NAME)	108													COVID19 (COVID19 (JANSSEN))	108													COVID19 (COVID19 (MODERNA))	108
ANTHRAX (BIOTHRAX)	109													ANTHRAX (NO BRAND NAME)	109													COVID19 (COVID19 (JANSSEN))	109													COVID19 (COVID19 (MODERNA))	109
ANTHRAX (BIOTHRAX)	110													ANTHRAX (NO BRAND NAME)	110													COVID19 (COVID19 (JANSSEN))	110													COVID19 (COVID19 (MODERNA))	110
ANTHRAX (BIOTHRAX)	111													ANTHRAX (NO BRAND NAME)	111													COVID19 (COVID19 (JANSSEN))	111													COVID19 (COVID19 (MODERNA))	111
ANTHRAX (BIOTHRAX)	112													ANTHRAX (NO BRAND NAME)	112													COVID19 (COVID19 (JANSSEN))	112													COVID19 (COVID19 (MODERNA))	112
ANTHRAX (BIOTHRAX)	113													ANTHRAX (NO BRAND NAME)	113													COVID19 (COVID19 (JANSSEN))	113													COVID19 (COVID19 (MODERNA))	113
ANTHRAX (BIOTHRAX)	114													ANTHRAX (NO BRAND NAME)	114													COVID19 (COVID19 (JANSSEN))	114													COVID19 (COVID19 (MODERNA))	114
ANTHRAX (BIOTHRAX)	115													ANTHRAX (NO BRAND NAME)	115													COVID19 (COVID19 (JANSSEN))	115													COVID19 (COVID19 (MODERNA))	115
ANTHRAX (BIOTHRAX)	116													ANTHRAX (NO BRAND NAME)	116													COVID19 (COVID19 (JANSSEN))	116													COVID19 (COVID19 (MODERNA))	116
ANTHRAX (BIOTHRAX)	117													ANTHRAX (NO BRAND NAME)	117													COVID19 (COVID19 (JANSSEN))	117													COVID19 (COVID19 (MODERNA))	117
ANTHRAX (BIOTHRAX)	118													ANTHRAX (NO BRAND NAME)	118													COVID19 (COVID19 (JANSSEN))	118													COVID19 (COVID19 (MODERNA))	118
ANTHRAX (BIOTHRAX)	119													ANTHRAX (NO BRAND NAME)	119													COVID19 (COVID19 (JANSSEN))	119													COVID19 (COVID19 (MODERNA))	119
ANTHRAX (BIOTHRAX)	120													ANTHRAX (NO BRAND NAME)	120													COVID19 (COVID19 (JANSSEN))	120													COVID19 (COVID19 (MODERNA))	120
Onset report
ANTHRAX (BIOTHRAX)	Onset	All	1	2	3	All Male	1 Male	2 Male	3 Male	All Female	1 Female	2 Female	3 Female	ANTHRAX (NO BRAND NAME)	Onset	All	1	2	3	All Male	1 Male	2 Male	3 Male	All Female	1 Female	2 Female	3 Female	COVID19 (COVID19 (JANSSEN))	Onset	All	1	2	3	All Male	1 Male	2 Male	3 Male	All Female	1 Female	2 Female	3 Female	COVID19 (COVID19 (MODERNA))	Onset	All	1	2	3	All Male	1 Male
ANTHRAX (BIOTHRAX)	0	2	2							2	2			ANTHRAX (NO BRAND NAME)	0													COVID19 (COVID19 (JANSSEN))	0	68	32							68	32			COVID19 (COVID19 (MODERNA))	0	209	125	51	1	1	1
ANTHRAX (BIOTHRAX)	1	1	1							1	1			ANTHRAX (NO BRAND NAME)	1													COVID19 (COVID19 (JANSSEN))	1	21	12							21	12			COVID19 (COVID19 (MODERNA))	1	126	64	43	5
ANTHRAX (BIOTHRAX)	2													ANTHRAX (NO BRAND NAME)	2													COVID19 (COVID19 (JANSSEN))	2	10	9			1	1			9	8			COVID19 (COVID19 (MODERNA))	2	58	34	17	1
ANTHRAX (BIOTHRAX)	3													ANTHRAX (NO BRAND NAME)	3	1	1							1	1			COVID19 (COVID19 (JANSSEN))	3	13	9	1						13	9	1		COVID19 (COVID19 (MODERNA))	3	50	22	16	3
ANTHRAX (BIOTHRAX)	4													ANTHRAX (NO BRAND NAME)	4													COVID19 (COVID19 (JANSSEN))	4	4	2							4	2			COVID19 (COVID19 (MODERNA))	4	19	13	5
ANTHRAX (BIOTHRAX)	5													ANTHRAX (NO BRAND NAME)	5	1		1						1		1		COVID19 (COVID19 (JANSSEN))	5	6	3							6	3			COVID19 (COVID19 (MODERNA))	5	15	5	8
ANTHRAX (BIOTHRAX)	6													ANTHRAX (NO BRAND NAME)	6													COVID19 (COVID19 (JANSSEN))	6	3	3							3	3			COVID19 (COVID19 (MODERNA))	6	17	8	7
ANTHRAX (BIOTHRAX)	7													ANTHRAX (NO BRAND NAME)	7													COVID19 (COVID19 (JANSSEN))	7	4	2							4	2			COVID19 (COVID19 (MODERNA))	7	30	17	9
ANTHRAX (BIOTHRAX)	8													ANTHRAX (NO BRAND NAME)	8													COVID19 (COVID19 (JANSSEN))	8	3	2							3	2			COVID19 (COVID19 (MODERNA))	8	14	12	2
ANTHRAX (BIOTHRAX)	9													ANTHRAX (NO BRAND NAME)	9													COVID19 (COVID19 (JANSSEN))	9	6	5							6	5			COVID19 (COVID19 (MODERNA))	9	17	11	4
ANTHRAX (BIOTHRAX)	10													ANTHRAX (NO BRAND NAME)	10													COVID19 (COVID19 (JANSSEN))	10	1	1							1	1			COVID19 (COVID19 (MODERNA))	10	10	4	5
ANTHRAX (BIOTHRAX)	11													ANTHRAX (NO BRAND NAME)	11													COVID19 (COVID19 (JANSSEN))	11	4	4							4	4			COVID19 (COVID19 (MODERNA))	11	8	5	2
ANTHRAX (BIOTHRAX)	12													ANTHRAX (NO BRAND NAME)	12													COVID19 (COVID19 (JANSSEN))	12	2	2							2	2			COVID19 (COVID19 (MODERNA))	12	12	5	7
ANTHRAX (BIOTHRAX)	13													ANTHRAX (NO BRAND NAME)	13													COVID19 (COVID19 (JANSSEN))	13	2	2							2	2			COVID19 (COVID19 (MODERNA))	13	20	9	8
ANTHRAX (BIOTHRAX)	14													ANTHRAX (NO BRAND NAME)	14													COVID19 (COVID19 (JANSSEN))	14	1	1							1	1			COVID19 (COVID19 (MODERNA))	14	23	14	7
ANTHRAX (BIOTHRAX)	15													ANTHRAX (NO BRAND NAME)	15													COVID19 (COVID19 (JANSSEN))	15													COVID19 (COVID19 (MODERNA))	15	14	4	9
ANTHRAX (BIOTHRAX)	16													ANTHRAX (NO BRAND NAME)	16													COVID19 (COVID19 (JANSSEN))	16	2	2							2	2			COVID19 (COVID19 (MODERNA))	16	11	5	3		1
ANTHRAX (BIOTHRAX)	17													ANTHRAX (NO BRAND NAME)	17													COVID19 (COVID19 (JANSSEN))	17	2	1							2	1			COVID19 (COVID19 (MODERNA))	17	9	6	3
ANTHRAX (BIOTHRAX)	18													ANTHRAX (NO BRAND NAME)	18													COVID19 (COVID19 (JANSSEN))	18	2								2				COVID19 (COVID19 (MODERNA))	18	9	3	3
ANTHRAX (BIOTHRAX)	19													ANTHRAX (NO BRAND NAME)	19													COVID19 (COVID19 (JANSSEN))	19	2								2				COVID19 (COVID19 (MODERNA))	19	8	4	4
ANTHRAX (BIOTHRAX)	20													ANTHRAX (NO BRAND NAME)	20													COVID19 (COVID19 (JANSSEN))	20													COVID19 (COVID19 (MODERNA))	20	12	6	4
ANTHRAX (BIOTHRAX)	21													ANTHRAX (NO BRAND NAME)	21													COVID19 (COVID19 (JANSSEN))	21	3	2							3	2			COVID19 (COVID19 (MODERNA))	21	8	4	3
ANTHRAX (BIOTHRAX)	22													ANTHRAX (NO BRAND NAME)	22													COVID19 (COVID19 (JANSSEN))	22	3	3							3	3			COVID19 (COVID19 (MODERNA))	22	8	3	4
ANTHRAX (BIOTHRAX)	23													ANTHRAX (NO BRAND NAME)	23													COVID19 (COVID19 (JANSSEN))	23	2	2							2	2			COVID19 (COVID19 (MODERNA))	23	5	3	1
ANTHRAX (BIOTHRAX)	24													ANTHRAX (NO BRAND NAME)	24													COVID19 (COVID19 (JANSSEN))	24													COVID19 (COVID19 (MODERNA))	24	6	4	1
ANTHRAX (BIOTHRAX)	25													ANTHRAX (NO BRAND NAME)	25													COVID19 (COVID19 (JANSSEN))	25	3	3							3	3			COVID19 (COVID19 (MODERNA))	25	5	1	3
ANTHRAX (BIOTHRAX)	26													ANTHRAX (NO BRAND NAME)	26													COVID19 (COVID19 (JANSSEN))	26													COVID19 (COVID19 (MODERNA))	26	9	6	2
ANTHRAX (BIOTHRAX)	27													ANTHRAX (NO BRAND NAME)	27													COVID19 (COVID19 (JANSSEN))	27	1	1							1	1			COVID19 (COVID19 (MODERNA))	27	6	1	5
ANTHRAX (BIOTHRAX)	28													ANTHRAX (NO BRAND NAME)	28													COVID19 (COVID19 (JANSSEN))	28													COVID19 (COVID19 (MODERNA))	28	14	9	3
ANTHRAX (BIOTHRAX)	29													ANTHRAX (NO BRAND NAME)	29													COVID19 (COVID19 (JANSSEN))	29													COVID19 (COVID19 (MODERNA))	29	6	4	2
ANTHRAX (BIOTHRAX)	30													ANTHRAX (NO BRAND NAME)	30													COVID19 (COVID19 (JANSSEN))	30	1	1							1	1			COVID19 (COVID19 (MODERNA))	30	7	2	2
ANTHRAX (BIOTHRAX)	31													ANTHRAX (NO BRAND NAME)	31													COVID19 (COVID19 (JANSSEN))	31	1								1				COVID19 (COVID19 (MODERNA))	31	9	4	4
ANTHRAX (BIOTHRAX)	32													ANTHRAX (NO BRAND NAME)	32													COVID19 (COVID19 (JANSSEN))	32													COVID19 (COVID19 (MODERNA))	32	1		1
ANTHRAX (BIOTHRAX)	33													ANTHRAX (NO BRAND NAME)	33													COVID19 (COVID19 (JANSSEN))	33	1	1							1	1			COVID19 (COVID19 (MODERNA))	33	4		3
ANTHRAX (BIOTHRAX)	34													ANTHRAX (NO BRAND NAME)	34													COVID19 (COVID19 (JANSSEN))	34													COVID19 (COVID19 (MODERNA))	34	1
ANTHRAX (BIOTHRAX)	35													ANTHRAX (NO BRAND NAME)	35													COVID19 (COVID19 (JANSSEN))	35													COVID19 (COVID19 (MODERNA))	35	4	3	1
ANTHRAX (BIOTHRAX)	36													ANTHRAX (NO BRAND NAME)	36													COVID19 (COVID19 (JANSSEN))	36													COVID19 (COVID19 (MODERNA))	36	1		1
ANTHRAX (BIOTHRAX)	37													ANTHRAX (NO BRAND NAME)	37													COVID19 (COVID19 (JANSSEN))	37													COVID19 (COVID19 (MODERNA))	37	2	1	1
ANTHRAX (BIOTHRAX)	38													ANTHRAX (NO BRAND NAME)	38													COVID19 (COVID19 (JANSSEN))	38													COVID19 (COVID19 (MODERNA))	38	3	3
ANTHRAX (BIOTHRAX)	39													ANTHRAX (NO BRAND NAME)	39													COVID19 (COVID19 (JANSSEN))	39	1	1							1	1			COVID19 (COVID19 (MODERNA))	39	5	3	2
ANTHRAX (BIOTHRAX)	40													ANTHRAX (NO BRAND NAME)	40													COVID19 (COVID19 (JANSSEN))	40													COVID19 (COVID19 (MODERNA))	40	1		1
ANTHRAX (BIOTHRAX)	41													ANTHRAX (NO BRAND NAME)	41													COVID19 (COVID19 (JANSSEN))	41													COVID19 (COVID19 (MODERNA))	41	2	1	1
ANTHRAX (BIOTHRAX)	42													ANTHRAX (NO BRAND NAME)	42													COVID19 (COVID19 (JANSSEN))	42													COVID19 (COVID19 (MODERNA))	42
ANTHRAX (BIOTHRAX)	43													ANTHRAX (NO BRAND NAME)	43													COVID19 (COVID19 (JANSSEN))	43													COVID19 (COVID19 (MODERNA))	43	2	1	1
ANTHRAX (BIOTHRAX)	44													ANTHRAX (NO BRAND NAME)	44													COVID19 (COVID19 (JANSSEN))	44	1	1							1	1			COVID19 (COVID19 (MODERNA))	44	5	2	3
ANTHRAX (BIOTHRAX)	45													ANTHRAX (NO BRAND NAME)	45													COVID19 (COVID19 (JANSSEN))	45	1	1							1	1			COVID19 (COVID19 (MODERNA))	45	3	1	2
ANTHRAX (BIOTHRAX)	46													ANTHRAX (NO BRAND NAME)	46													COVID19 (COVID19 (JANSSEN))	46													COVID19 (COVID19 (MODERNA))	46	1
ANTHRAX (BIOTHRAX)	47													ANTHRAX (NO BRAND NAME)	47													COVID19 (COVID19 (JANSSEN))	47													COVID19 (COVID19 (MODERNA))	47	2	1	1
ANTHRAX (BIOTHRAX)	48													ANTHRAX (NO BRAND NAME)	48													COVID19 (COVID19 (JANSSEN))	48													COVID19 (COVID19 (MODERNA))	48	3	1	2
ANTHRAX (BIOTHRAX)	49													ANTHRAX (NO BRAND NAME)	49													COVID19 (COVID19 (JANSSEN))	49													COVID19 (COVID19 (MODERNA))	49
ANTHRAX (BIOTHRAX)	50													ANTHRAX (NO BRAND NAME)	50													COVID19 (COVID19 (JANSSEN))	50													COVID19 (COVID19 (MODERNA))	50	2	1	1
ANTHRAX (BIOTHRAX)	51													ANTHRAX (NO BRAND NAME)	51													COVID19 (COVID19 (JANSSEN))	51													COVID19 (COVID19 (MODERNA))	51	4	2	2
ANTHRAX (BIOTHRAX)	52													ANTHRAX (NO BRAND NAME)	52													COVID19 (COVID19 (JANSSEN))	52													COVID19 (COVID19 (MODERNA))	52	2	1	1
ANTHRAX (BIOTHRAX)	53													ANTHRAX (NO BRAND NAME)	53													COVID19 (COVID19 (JANSSEN))	53													COVID19 (COVID19 (MODERNA))	53	4	2	1
ANTHRAX (BIOTHRAX)	54													ANTHRAX (NO BRAND NAME)	54													COVID19 (COVID19 (JANSSEN))	54	1	1							1	1			COVID19 (COVID19 (MODERNA))	54	4	3	1
ANTHRAX (BIOTHRAX)	55													ANTHRAX (NO BRAND NAME)	55													COVID19 (COVID19 (JANSSEN))	55													COVID19 (COVID19 (MODERNA))	55	1	1
ANTHRAX (BIOTHRAX)	56													ANTHRAX (NO BRAND NAME)	56													COVID19 (COVID19 (JANSSEN))	56													COVID19 (COVID19 (MODERNA))	56	2	1	1
ANTHRAX (BIOTHRAX)	57													ANTHRAX (NO BRAND NAME)	57													COVID19 (COVID19 (JANSSEN))	57													COVID19 (COVID19 (MODERNA))	57
ANTHRAX (BIOTHRAX)	58													ANTHRAX (NO BRAND NAME)	58													COVID19 (COVID19 (JANSSEN))	58	1	1							1	1			COVID19 (COVID19 (MODERNA))	58
ANTHRAX (BIOTHRAX)	59													ANTHRAX (NO BRAND NAME)	59													COVID19 (COVID19 (JANSSEN))	59													COVID19 (COVID19 (MODERNA))	59	1	1
ANTHRAX (BIOTHRAX)	60													ANTHRAX (NO BRAND NAME)	60													COVID19 (COVID19 (JANSSEN))	60													COVID19 (COVID19 (MODERNA))	60
ANTHRAX (BIOTHRAX)	61													ANTHRAX (NO BRAND NAME)	61													COVID19 (COVID19 (JANSSEN))	61													COVID19 (COVID19 (MODERNA))	61	2	1	1
ANTHRAX (BIOTHRAX)	62													ANTHRAX (NO BRAND NAME)	62													COVID19 (COVID19 (JANSSEN))	62													COVID19 (COVID19 (MODERNA))	62	2	1	1
ANTHRAX (BIOTHRAX)	63													ANTHRAX (NO BRAND NAME)	63													COVID19 (COVID19 (JANSSEN))	63													COVID19 (COVID19 (MODERNA))	63	1	1
ANTHRAX (BIOTHRAX)	64													ANTHRAX (NO BRAND NAME)	64													COVID19 (COVID19 (JANSSEN))	64													COVID19 (COVID19 (MODERNA))	64
ANTHRAX (BIOTHRAX)	65													ANTHRAX (NO BRAND NAME)	65													COVID19 (COVID19 (JANSSEN))	65													COVID19 (COVID19 (MODERNA))	65
ANTHRAX (BIOTHRAX)	66													ANTHRAX (NO BRAND NAME)	66													COVID19 (COVID19 (JANSSEN))	66													COVID19 (COVID19 (MODERNA))	66
ANTHRAX (BIOTHRAX)	67													ANTHRAX (NO BRAND NAME)	67													COVID19 (COVID19 (JANSSEN))	67													COVID19 (COVID19 (MODERNA))	67	2	1	1
ANTHRAX (BIOTHRAX)	68													ANTHRAX (NO BRAND NAME)	68													COVID19 (COVID19 (JANSSEN))	68													COVID19 (COVID19 (MODERNA))	68
ANTHRAX (BIOTHRAX)	69													ANTHRAX (NO BRAND NAME)	69													COVID19 (COVID19 (JANSSEN))	69													COVID19 (COVID19 (MODERNA))	69
ANTHRAX (BIOTHRAX)	70													ANTHRAX (NO BRAND NAME)	70													COVID19 (COVID19 (JANSSEN))	70													COVID19 (COVID19 (MODERNA))	70	5	2	3
ANTHRAX (BIOTHRAX)	71													ANTHRAX (NO BRAND NAME)	71													COVID19 (COVID19 (JANSSEN))	71													COVID19 (COVID19 (MODERNA))	71	1	1
ANTHRAX (BIOTHRAX)	72													ANTHRAX (NO BRAND NAME)	72													COVID19 (COVID19 (JANSSEN))	72													COVID19 (COVID19 (MODERNA))	72	2		1
ANTHRAX (BIOTHRAX)	73													ANTHRAX (NO BRAND NAME)	73													COVID19 (COVID19 (JANSSEN))	73													COVID19 (COVID19 (MODERNA))	73	2	1	1
ANTHRAX (BIOTHRAX)	74													ANTHRAX (NO BRAND NAME)	74													COVID19 (COVID19 (JANSSEN))	74	1	1							1	1			COVID19 (COVID19 (MODERNA))	74
ANTHRAX (BIOTHRAX)	75													ANTHRAX (NO BRAND NAME)	75													COVID19 (COVID19 (JANSSEN))	75													COVID19 (COVID19 (MODERNA))	75	2		2
ANTHRAX (BIOTHRAX)	76													ANTHRAX (NO BRAND NAME)	76													COVID19 (COVID19 (JANSSEN))	76													COVID19 (COVID19 (MODERNA))	76
ANTHRAX (BIOTHRAX)	77													ANTHRAX (NO BRAND NAME)	77													COVID19 (COVID19 (JANSSEN))	77													COVID19 (COVID19 (MODERNA))	77
ANTHRAX (BIOTHRAX)	78													ANTHRAX (NO BRAND NAME)	78													COVID19 (COVID19 (JANSSEN))	78													COVID19 (COVID19 (MODERNA))	78
ANTHRAX (BIOTHRAX)	79													ANTHRAX (NO BRAND NAME)	79													COVID19 (COVID19 (JANSSEN))	79													COVID19 (COVID19 (MODERNA))	79	1	1
ANTHRAX (BIOTHRAX)	80													ANTHRAX (NO BRAND NAME)	80													COVID19 (COVID19 (JANSSEN))	80													COVID19 (COVID19 (MODERNA))	80
ANTHRAX (BIOTHRAX)	81													ANTHRAX (NO BRAND NAME)	81													COVID19 (COVID19 (JANSSEN))	81													COVID19 (COVID19 (MODERNA))	81
ANTHRAX (BIOTHRAX)	82													ANTHRAX (NO BRAND NAME)	82													COVID19 (COVID19 (JANSSEN))	82													COVID19 (COVID19 (MODERNA))	82
ANTHRAX (BIOTHRAX)	83													ANTHRAX (NO BRAND NAME)	83													COVID19 (COVID19 (JANSSEN))	83													COVID19 (COVID19 (MODERNA))	83
ANTHRAX (BIOTHRAX)	84													ANTHRAX (NO BRAND NAME)	84													COVID19 (COVID19 (JANSSEN))	84													COVID19 (COVID19 (MODERNA))	84
ANTHRAX (BIOTHRAX)	85													ANTHRAX (NO BRAND NAME)	85													COVID19 (COVID19 (JANSSEN))	85													COVID19 (COVID19 (MODERNA))	85	2	2
ANTHRAX (BIOTHRAX)	86													ANTHRAX (NO BRAND NAME)	86													COVID19 (COVID19 (JANSSEN))	86													COVID19 (COVID19 (MODERNA))	86
ANTHRAX (BIOTHRAX)	87													ANTHRAX (NO BRAND NAME)	87													COVID19 (COVID19 (JANSSEN))	87													COVID19 (COVID19 (MODERNA))	87
ANTHRAX (BIOTHRAX)	88													ANTHRAX (NO BRAND NAME)	88													COVID19 (COVID19 (JANSSEN))	88													COVID19 (COVID19 (MODERNA))	88
ANTHRAX (BIOTHRAX)	89													ANTHRAX (NO BRAND NAME)	89													COVID19 (COVID19 (JANSSEN))	89													COVID19 (COVID19 (MODERNA))	89	1	1
ANTHRAX (BIOTHRAX)	90													ANTHRAX (NO BRAND NAME)	90													COVID19 (COVID19 (JANSSEN))	90													COVID19 (COVID19 (MODERNA))	90	2	1	1
ANTHRAX (BIOTHRAX)	91													ANTHRAX (NO BRAND NAME)	91													COVID19 (COVID19 (JANSSEN))	91													COVID19 (COVID19 (MODERNA))	91
ANTHRAX (BIOTHRAX)	92													ANTHRAX (NO BRAND NAME)	92													COVID19 (COVID19 (JANSSEN))	92	1								1				COVID19 (COVID19 (MODERNA))	92
ANTHRAX (BIOTHRAX)	93													ANTHRAX (NO BRAND NAME)	93													COVID19 (COVID19 (JANSSEN))	93													COVID19 (COVID19 (MODERNA))	93
ANTHRAX (BIOTHRAX)	94													ANTHRAX (NO BRAND NAME)	94													COVID19 (COVID19 (JANSSEN))	94													COVID19 (COVID19 (MODERNA))	94
ANTHRAX (BIOTHRAX)	95													ANTHRAX (NO BRAND NAME)	95													COVID19 (COVID19 (JANSSEN))	95													COVID19 (COVID19 (MODERNA))	95
ANTHRAX (BIOTHRAX)	96													ANTHRAX (NO BRAND NAME)	96													COVID19 (COVID19 (JANSSEN))	96													COVID19 (COVID19 (MODERNA))	96
ANTHRAX (BIOTHRAX)	97													ANTHRAX (NO BRAND NAME)	97													COVID19 (COVID19 (JANSSEN))	97													COVID19 (COVID19 (MODERNA))	97
ANTHRAX (BIOTHRAX)	98													ANTHRAX (NO BRAND NAME)	98													COVID19 (COVID19 (JANSSEN))	98													COVID19 (COVID19 (MODERNA))	98
ANTHRAX (BIOTHRAX)	99													ANTHRAX (NO BRAND NAME)	99													COVID19 (COVID19 (JANSSEN))	99													COVID19 (COVID19 (MODERNA))	99
ANTHRAX (BIOTHRAX)	100													ANTHRAX (NO BRAND NAME)	100													COVID19 (COVID19 (JANSSEN))	100													COVID19 (COVID19 (MODERNA))	100
ANTHRAX (BIOTHRAX)	101													ANTHRAX (NO BRAND NAME)	101													COVID19 (COVID19 (JANSSEN))	101													COVID19 (COVID19 (MODERNA))	101	1		1
ANTHRAX (BIOTHRAX)	102													ANTHRAX (NO BRAND NAME)	102													COVID19 (COVID19 (JANSSEN))	102													COVID19 (COVID19 (MODERNA))	102
ANTHRAX (BIOTHRAX)	103													ANTHRAX (NO BRAND NAME)	103													COVID19 (COVID19 (JANSSEN))	103													COVID19 (COVID19 (MODERNA))	103
ANTHRAX (BIOTHRAX)	104													ANTHRAX (NO BRAND NAME)	104													COVID19 (COVID19 (JANSSEN))	104													COVID19 (COVID19 (MODERNA))	104
ANTHRAX (BIOTHRAX)	105													ANTHRAX (NO BRAND NAME)	105													COVID19 (COVID19 (JANSSEN))	105													COVID19 (COVID19 (MODERNA))	105
ANTHRAX (BIOTHRAX)	106													ANTHRAX (NO BRAND NAME)	106													COVID19 (COVID19 (JANSSEN))	106													COVID19 (COVID19 (MODERNA))	106
ANTHRAX (BIOTHRAX)	107													ANTHRAX (NO BRAND NAME)	107													COVID19 (COVID19 (JANSSEN))	107													COVID19 (COVID19 (MODERNA))	107
ANTHRAX (BIOTHRAX)	108													ANTHRAX (NO BRAND NAME)	108													COVID19 (COVID19 (JANSSEN))	108													COVID19 (COVID19 (MODERNA))	108
ANTHRAX (BIOTHRAX)	109													ANTHRAX (NO BRAND NAME)	109													COVID19 (COVID19 (JANSSEN))	109													COVID19 (COVID19 (MODERNA))	109
ANTHRAX (BIOTHRAX)	110													ANTHRAX (NO BRAND NAME)	110													COVID19 (COVID19 (JANSSEN))	110													COVID19 (COVID19 (MODERNA))	110
ANTHRAX (BIOTHRAX)	111													ANTHRAX (NO BRAND NAME)	111													COVID19 (COVID19 (JANSSEN))	111													COVID19 (COVID19 (MODERNA))	111
ANTHRAX (BIOTHRAX)	112													ANTHRAX (NO BRAND NAME)	112													COVID19 (COVID19 (JANSSEN))	112													COVID19 (COVID19 (MODERNA))	112
ANTHRAX (BIOTHRAX)	113													ANTHRAX (NO BRAND NAME)	113													COVID19 (COVID19 (JANSSEN))	113													COVID19 (COVID19 (MODERNA))	113
ANTHRAX (BIOTHRAX)	114													ANTHRAX (NO BRAND NAME)	114													COVID19 (COVID19 (JANSSEN))	114													COVID19 (COVID19 (MODERNA))	114	2	1	1
ANTHRAX (BIOTHRAX)	115													ANTHRAX (NO BRAND NAME)	115													COVID19 (COVID19 (JANSSEN))	115													COVID19 (COVID19 (MODERNA))	115
ANTHRAX (BIOTHRAX)	116													ANTHRAX (NO BRAND NAME)	116													COVID19 (COVID19 (JANSSEN))	116													COVID19 (COVID19 (MODERNA))	116
ANTHRAX (BIOTHRAX)	117													ANTHRAX (NO BRAND NAME)	117													COVID19 (COVID19 (JANSSEN))	117													COVID19 (COVID19 (MODERNA))	117
ANTHRAX (BIOTHRAX)	118													ANTHRAX (NO BRAND NAME)	118													COVID19 (COVID19 (JANSSEN))	118													COVID19 (COVID19 (MODERNA))	118	1		1
ANTHRAX (BIOTHRAX)	119													ANTHRAX (NO BRAND NAME)	119													COVID19 (COVID19 (JANSSEN))	119	1	1							1	1			COVID19 (COVID19 (MODERNA))	119
ANTHRAX (BIOTHRAX)	120													ANTHRAX (NO BRAND NAME)	120													COVID19 (COVID19 (JANSSEN))	120													COVID19 (COVID19 (MODERNA))	120
[truncated: 482 more columns]

## Sheet: All_heavy_menstrual
Dose report
Vaccine	All	1	2	3	4	5	6	7+	UNK	N/A
COVID19 (COVID19 (PFIZER-BIONTECH))	7113	3792	2631	65					625
COVID19 (COVID19 (MODERNA))	1885	965	666	19					235
COVID19 (COVID19 (JANSSEN))	449	301	3						131	14
VACCINE NOT SPECIFIED (NO BRAND NAME)	62	11	13						38
COVID19 (COVID19 (UNKNOWN))	9	3	2						4
HPV (GARDASIL)	6	1	2	1					2
HPV (GARDASIL 9)	6	1	3						2
HEP A (NO BRAND NAME)	2								2
ZOSTER (SHINGRIX)	1	1
EBOLA ZAIRE (ERVEBO)	1								1
MENINGOCOCCAL B (BEXSERO)	1		1
VACCINE NOT SPECIFIED (OTHER)	1	1
VACCINE NOT SPECIFIED (FOREIGN)	1	1
INFLUENZA (SEASONAL) (NO BRAND NAME)	1								1
INFLUENZA (SEASONAL) (QIV DRESDEN)	1								1
Total	9539	5077	3321	85	0	0	0	0	1042	14
COVID-19	9456	5061	3302	84	0	0	0	0	995	14
COVID-19 %	0.991299	0.996849	0.994279	0.988235					0.954894	1
Age report
COVID19 (COVID19 (JANSSEN))	Age	All	1	2	3	All Male	1 Male	2 Male	3 Male	All Female	1 Female	2 Female	3 Female	COVID19 (COVID19 (MODERNA))	Age	All	1	2	3	All Male	1 Male	2 Male	3 Male	All Female	1 Female	2 Female	3 Female	COVID19 (COVID19 (PFIZER-BIONTECH))	Age	All	1	2	3	All Male	1 Male	2 Male	3 Male	All Female	1 Female	2 Female	3 Female	COVID19 (COVID19 (UNKNOWN))	Age	All	1	2	3	All Male	1 Male
COVID19 (COVID19 (JANSSEN))	0	57	2							56	1			COVID19 (COVID19 (MODERNA))	0	102	79	15						90	75	10		COVID19 (COVID19 (PFIZER-BIONTECH))	0	3809	2351	1195	16	4	2	2		3722	2301	1165	16	COVID19 (COVID19 (UNKNOWN))	0	2	1
COVID19 (COVID19 (JANSSEN))	1													COVID19 (COVID19 (MODERNA))	1													COVID19 (COVID19 (PFIZER-BIONTECH))	1													COVID19 (COVID19 (UNKNOWN))	1
COVID19 (COVID19 (JANSSEN))	2													COVID19 (COVID19 (MODERNA))	2													COVID19 (COVID19 (PFIZER-BIONTECH))	2													COVID19 (COVID19 (UNKNOWN))	2
COVID19 (COVID19 (JANSSEN))	3													COVID19 (COVID19 (MODERNA))	3													COVID19 (COVID19 (PFIZER-BIONTECH))	3													COVID19 (COVID19 (UNKNOWN))	3
COVID19 (COVID19 (JANSSEN))	4													COVID19 (COVID19 (MODERNA))	4													COVID19 (COVID19 (PFIZER-BIONTECH))	4													COVID19 (COVID19 (UNKNOWN))	4
COVID19 (COVID19 (JANSSEN))	5													COVID19 (COVID19 (MODERNA))	5													COVID19 (COVID19 (PFIZER-BIONTECH))	5													COVID19 (COVID19 (UNKNOWN))	5
COVID19 (COVID19 (JANSSEN))	6													COVID19 (COVID19 (MODERNA))	6													COVID19 (COVID19 (PFIZER-BIONTECH))	6													COVID19 (COVID19 (UNKNOWN))	6
COVID19 (COVID19 (JANSSEN))	7													COVID19 (COVID19 (MODERNA))	7													COVID19 (COVID19 (PFIZER-BIONTECH))	7													COVID19 (COVID19 (UNKNOWN))	7
COVID19 (COVID19 (JANSSEN))	8													COVID19 (COVID19 (MODERNA))	8													COVID19 (COVID19 (PFIZER-BIONTECH))	8													COVID19 (COVID19 (UNKNOWN))	8
COVID19 (COVID19 (JANSSEN))	9													COVID19 (COVID19 (MODERNA))	9													COVID19 (COVID19 (PFIZER-BIONTECH))	9													COVID19 (COVID19 (UNKNOWN))	9
COVID19 (COVID19 (JANSSEN))	10													COVID19 (COVID19 (MODERNA))	10													COVID19 (COVID19 (PFIZER-BIONTECH))	10													COVID19 (COVID19 (UNKNOWN))	10
COVID19 (COVID19 (JANSSEN))	11													COVID19 (COVID19 (MODERNA))	11													COVID19 (COVID19 (PFIZER-BIONTECH))	11													COVID19 (COVID19 (UNKNOWN))	11
COVID19 (COVID19 (JANSSEN))	12													COVID19 (COVID19 (MODERNA))	12													COVID19 (COVID19 (PFIZER-BIONTECH))	12	7	3	3		1	1			6	2	3		COVID19 (COVID19 (UNKNOWN))	12
COVID19 (COVID19 (JANSSEN))	13													COVID19 (COVID19 (MODERNA))	13													COVID19 (COVID19 (PFIZER-BIONTECH))	13	18	9	8						18	9	8		COVID19 (COVID19 (UNKNOWN))	13
COVID19 (COVID19 (JANSSEN))	14													COVID19 (COVID19 (MODERNA))	14													COVID19 (COVID19 (PFIZER-BIONTECH))	14	18	5	9						18	5	9		COVID19 (COVID19 (UNKNOWN))	14
COVID19 (COVID19 (JANSSEN))	15													COVID19 (COVID19 (MODERNA))	15													COVID19 (COVID19 (PFIZER-BIONTECH))	15	24	9	12						24	9	12		COVID19 (COVID19 (UNKNOWN))	15
COVID19 (COVID19 (JANSSEN))	16													COVID19 (COVID19 (MODERNA))	16													COVID19 (COVID19 (PFIZER-BIONTECH))	16	21	11	7						21	11	7		COVID19 (COVID19 (UNKNOWN))	16
COVID19 (COVID19 (JANSSEN))	17													COVID19 (COVID19 (MODERNA))	17	1								1				COVID19 (COVID19 (PFIZER-BIONTECH))	17	25	14	8						25	14	8		COVID19 (COVID19 (UNKNOWN))	17
COVID19 (COVID19 (JANSSEN))	18	5	5							5	5			COVID19 (COVID19 (MODERNA))	18	6	4							6	4			COVID19 (COVID19 (PFIZER-BIONTECH))	18	19	6	13						19	6	13		COVID19 (COVID19 (UNKNOWN))	18
COVID19 (COVID19 (JANSSEN))	19	2	2							2	2			COVID19 (COVID19 (MODERNA))	19	14	7	6						14	7	6		COVID19 (COVID19 (PFIZER-BIONTECH))	19	18	9	5						18	9	5		COVID19 (COVID19 (UNKNOWN))	19
COVID19 (COVID19 (JANSSEN))	20	4	3							4	3			COVID19 (COVID19 (MODERNA))	20	22	8	12						22	8	12		COVID19 (COVID19 (PFIZER-BIONTECH))	20	36	17	14						36	17	14		COVID19 (COVID19 (UNKNOWN))	20
COVID19 (COVID19 (JANSSEN))	21	3	3							3	3			COVID19 (COVID19 (MODERNA))	21	17	12	3						17	12	3		COVID19 (COVID19 (PFIZER-BIONTECH))	21	35	13	16						35	13	16		COVID19 (COVID19 (UNKNOWN))	21
COVID19 (COVID19 (JANSSEN))	22	4	4							4	4			COVID19 (COVID19 (MODERNA))	22	19	9	7						19	9	7		COVID19 (COVID19 (PFIZER-BIONTECH))	22	34	16	13						34	16	13		COVID19 (COVID19 (UNKNOWN))	22	1
COVID19 (COVID19 (JANSSEN))	23	5	5							5	5			COVID19 (COVID19 (MODERNA))	23	21	11	8						20	10	8		COVID19 (COVID19 (PFIZER-BIONTECH))	23	49	24	22						49	24	22		COVID19 (COVID19 (UNKNOWN))	23
COVID19 (COVID19 (JANSSEN))	24	3	2							3	2			COVID19 (COVID19 (MODERNA))	24	36	23	9		1				35	23	9		COVID19 (COVID19 (PFIZER-BIONTECH))	24	65	30	26	3					64	29	26	3	COVID19 (COVID19 (UNKNOWN))	24
COVID19 (COVID19 (JANSSEN))	25	8	6							8	6			COVID19 (COVID19 (MODERNA))	25	30	19	8						29	18	8		COVID19 (COVID19 (PFIZER-BIONTECH))	25	69	31	26	1					68	31	26	1	COVID19 (COVID19 (UNKNOWN))	25
COVID19 (COVID19 (JANSSEN))	26	9	5			1	1			8	4			COVID19 (COVID19 (MODERNA))	26	50	27	16	1					50	27	16	1	COVID19 (COVID19 (PFIZER-BIONTECH))	26	74	41	26	1					74	41	26	1	COVID19 (COVID19 (UNKNOWN))	26
COVID19 (COVID19 (JANSSEN))	27	6	4							6	4			COVID19 (COVID19 (MODERNA))	27	48	23	19	1					48	23	19	1	COVID19 (COVID19 (PFIZER-BIONTECH))	27	74	42	26		1	1			73	41	26		COVID19 (COVID19 (UNKNOWN))	27
COVID19 (COVID19 (JANSSEN))	28	11	9							11	9			COVID19 (COVID19 (MODERNA))	28	48	26	13						48	26	13		COVID19 (COVID19 (PFIZER-BIONTECH))	28	96	47	40	1					95	46	40	1	COVID19 (COVID19 (UNKNOWN))	28
COVID19 (COVID19 (JANSSEN))	29	5	4							5	4			COVID19 (COVID19 (MODERNA))	29	49	22	17	1					48	21	17	1	COVID19 (COVID19 (PFIZER-BIONTECH))	29	89	50	30						89	50	30		COVID19 (COVID19 (UNKNOWN))	29
COVID19 (COVID19 (JANSSEN))	30	14	11							14	11			COVID19 (COVID19 (MODERNA))	30	63	41	19						62	41	19		COVID19 (COVID19 (PFIZER-BIONTECH))	30	88	45	29	1					87	45	28	1	COVID19 (COVID19 (UNKNOWN))	30	1
COVID19 (COVID19 (JANSSEN))	31	12	9							12	9			COVID19 (COVID19 (MODERNA))	31	66	32	27						66	32	27		COVID19 (COVID19 (PFIZER-BIONTECH))	31	127	52	59	1					127	52	59	1	COVID19 (COVID19 (UNKNOWN))	31
COVID19 (COVID19 (JANSSEN))	32	17	10	1						17	10	1		COVID19 (COVID19 (MODERNA))	32	69	42	25						69	42	25		COVID19 (COVID19 (PFIZER-BIONTECH))	32	123	63	50	3					122	62	50	3	COVID19 (COVID19 (UNKNOWN))	32
COVID19 (COVID19 (JANSSEN))	33	14	12			1				13	12			COVID19 (COVID19 (MODERNA))	33	57	31	20		1		1		56	31	19		COVID19 (COVID19 (PFIZER-BIONTECH))	33	120	49	54	1					120	49	54	1	COVID19 (COVID19 (UNKNOWN))	33
COVID19 (COVID19 (JANSSEN))	34	17	10							17	10			COVID19 (COVID19 (MODERNA))	34	72	31	29	2					72	31	29	2	COVID19 (COVID19 (PFIZER-BIONTECH))	34	126	58	53						125	58	52		COVID19 (COVID19 (UNKNOWN))	34
COVID19 (COVID19 (JANSSEN))	35	6	4							6	4			COVID19 (COVID19 (MODERNA))	35	80	39	23	1					80	39	23	1	COVID19 (COVID19 (PFIZER-BIONTECH))	35	124	58	51	1					124	58	51	1	COVID19 (COVID19 (UNKNOWN))	35
COVID19 (COVID19 (JANSSEN))	36	16	14							15	13			COVID19 (COVID19 (MODERNA))	36	77	45	25	2					76	44	25	2	COVID19 (COVID19 (PFIZER-BIONTECH))	36	133	52	70	2					133	52	70	2	COVID19 (COVID19 (UNKNOWN))	36
COVID19 (COVID19 (JANSSEN))	37	7	6							7	6			COVID19 (COVID19 (MODERNA))	37	61	30	23						61	30	23		COVID19 (COVID19 (PFIZER-BIONTECH))	37	145	68	65	2	2	1	1		143	67	64	2	COVID19 (COVID19 (UNKNOWN))	37	1		1
COVID19 (COVID19 (JANSSEN))	38	19	16	1						19	16	1		COVID19 (COVID19 (MODERNA))	38	65	32	18		1				64	32	18		COVID19 (COVID19 (PFIZER-BIONTECH))	38	129	61	51	6					129	61	51	6	COVID19 (COVID19 (UNKNOWN))	38
COVID19 (COVID19 (JANSSEN))	39	14	13							14	13			COVID19 (COVID19 (MODERNA))	39	80	39	31	1					79	38	31	1	COVID19 (COVID19 (PFIZER-BIONTECH))	39	138	53	66	2					138	53	66	2	COVID19 (COVID19 (UNKNOWN))	39
COVID19 (COVID19 (JANSSEN))	40	19	16							19	16			COVID19 (COVID19 (MODERNA))	40	73	30	36	1					73	30	36	1	COVID19 (COVID19 (PFIZER-BIONTECH))	40	129	48	64	2	1	1			128	47	64	2	COVID19 (COVID19 (UNKNOWN))	40
COVID19 (COVID19 (JANSSEN))	41	20	16							20	16			COVID19 (COVID19 (MODERNA))	41	56	30	22						56	30	22		COVID19 (COVID19 (PFIZER-BIONTECH))	41	114	56	44	1					113	56	43	1	COVID19 (COVID19 (UNKNOWN))	41
COVID19 (COVID19 (JANSSEN))	42	16	13							16	13			COVID19 (COVID19 (MODERNA))	42	54	26	21	2					54	26	21	2	COVID19 (COVID19 (PFIZER-BIONTECH))	42	112	44	51	2					112	44	51	2	COVID19 (COVID19 (UNKNOWN))	42
COVID19 (COVID19 (JANSSEN))	43	15	10			2	2			13	8			COVID19 (COVID19 (MODERNA))	43	67	27	27	2	1	1			66	26	27	2	COVID19 (COVID19 (PFIZER-BIONTECH))	43	122	55	56	3					122	55	56	3	COVID19 (COVID19 (UNKNOWN))	43
COVID19 (COVID19 (JANSSEN))	44	11	6							11	6			COVID19 (COVID19 (MODERNA))	44	69	35	23	1					69	35	23	1	COVID19 (COVID19 (PFIZER-BIONTECH))	44	101	36	48	1					101	36	48	1	COVID19 (COVID19 (UNKNOWN))	44	1		1
COVID19 (COVID19 (JANSSEN))	45	18	16							18	16			COVID19 (COVID19 (MODERNA))	45	45	18	20	1					45	18	20	1	COVID19 (COVID19 (PFIZER-BIONTECH))	45	91	36	40	4					91	36	40	4	COVID19 (COVID19 (UNKNOWN))	45
COVID19 (COVID19 (JANSSEN))	46	14	12							14	12			COVID19 (COVID19 (MODERNA))	46	46	27	15						46	27	15		COVID19 (COVID19 (PFIZER-BIONTECH))	46	94	39	46						94	39	46		COVID19 (COVID19 (UNKNOWN))	46	1	1
COVID19 (COVID19 (JANSSEN))	47	12	7			1				11	7			COVID19 (COVID19 (MODERNA))	47	68	34	25	1					68	34	25	1	COVID19 (COVID19 (PFIZER-BIONTECH))	47	77	27	34	1					77	27	34	1	COVID19 (COVID19 (UNKNOWN))	47
COVID19 (COVID19 (JANSSEN))	48	10	8							10	8			COVID19 (COVID19 (MODERNA))	48	38	19	14						38	19	14		COVID19 (COVID19 (PFIZER-BIONTECH))	48	90	38	40	2					89	38	39	2	COVID19 (COVID19 (UNKNOWN))	48
COVID19 (COVID19 (JANSSEN))	49	6	4							6	4			COVID19 (COVID19 (MODERNA))	49	53	21	22						53	21	22		COVID19 (COVID19 (PFIZER-BIONTECH))	49	82	23	44	1					82	23	44	1	COVID19 (COVID19 (UNKNOWN))	49	1	1
COVID19 (COVID19 (JANSSEN))	50	18	15							18	15			COVID19 (COVID19 (MODERNA))	50	38	12	17		1	1			37	11	17		COVID19 (COVID19 (PFIZER-BIONTECH))	50	61	20	30	4					61	20	30	4	COVID19 (COVID19 (UNKNOWN))	50
COVID19 (COVID19 (JANSSEN))	51	13	8							13	8			COVID19 (COVID19 (MODERNA))	51	37	18	16	2					37	18	16	2	COVID19 (COVID19 (PFIZER-BIONTECH))	51	63	29	23	1					63	29	23	1	COVID19 (COVID19 (UNKNOWN))	51
COVID19 (COVID19 (JANSSEN))	52	5	3							5	3			COVID19 (COVID19 (MODERNA))	52	33	14	17		1	1			32	13	17		COVID19 (COVID19 (PFIZER-BIONTECH))	52	35	10	12	1					34	9	12	1	COVID19 (COVID19 (UNKNOWN))	52
COVID19 (COVID19 (JANSSEN))	53	4	3							4	3			COVID19 (COVID19 (MODERNA))	53	21	11	5						21	11	5		COVID19 (COVID19 (PFIZER-BIONTECH))	53	31	10	18						31	10	18		COVID19 (COVID19 (UNKNOWN))	53
COVID19 (COVID19 (JANSSEN))	54	5	2	1						5	2	1		COVID19 (COVID19 (MODERNA))	54	10	2	5						10	2	5		COVID19 (COVID19 (PFIZER-BIONTECH))	54	22	7	12	1					22	7	12	1	COVID19 (COVID19 (UNKNOWN))	54
COVID19 (COVID19 (JANSSEN))	55	2	1							2	1			COVID19 (COVID19 (MODERNA))	55	12	5	3						12	5	3		COVID19 (COVID19 (PFIZER-BIONTECH))	55	16	7	5						16	7	5		COVID19 (COVID19 (UNKNOWN))	55
COVID19 (COVID19 (JANSSEN))	56	1								1				COVID19 (COVID19 (MODERNA))	56	2		1						2		1		COVID19 (COVID19 (PFIZER-BIONTECH))	56	16	7	7						16	7	7		COVID19 (COVID19 (UNKNOWN))	56
COVID19 (COVID19 (JANSSEN))	57	1	1							1	1			COVID19 (COVID19 (MODERNA))	57	3	1	2						3	1	2		COVID19 (COVID19 (PFIZER-BIONTECH))	57	8	4	4						8	4	4		COVID19 (COVID19 (UNKNOWN))	57
COVID19 (COVID19 (JANSSEN))	58													COVID19 (COVID19 (MODERNA))	58	3	1	1						3	1	1		COVID19 (COVID19 (PFIZER-BIONTECH))	58	5	2	3						5	2	3		COVID19 (COVID19 (UNKNOWN))	58	1
COVID19 (COVID19 (JANSSEN))	59	1	1							1	1			COVID19 (COVID19 (MODERNA))	59													COVID19 (COVID19 (PFIZER-BIONTECH))	59	1		1						1		1		COVID19 (COVID19 (UNKNOWN))	59
COVID19 (COVID19 (JANSSEN))	60													COVID19 (COVID19 (MODERNA))	60													COVID19 (COVID19 (PFIZER-BIONTECH))	60	4	3							4	3			COVID19 (COVID19 (UNKNOWN))	60
COVID19 (COVID19 (JANSSEN))	61													COVID19 (COVID19 (MODERNA))	61													COVID19 (COVID19 (PFIZER-BIONTECH))	61	1		1						1		1		COVID19 (COVID19 (UNKNOWN))	61
COVID19 (COVID19 (JANSSEN))	62													COVID19 (COVID19 (MODERNA))	62													COVID19 (COVID19 (PFIZER-BIONTECH))	62													COVID19 (COVID19 (UNKNOWN))	62
COVID19 (COVID19 (JANSSEN))	63													COVID19 (COVID19 (MODERNA))	63													COVID19 (COVID19 (PFIZER-BIONTECH))	63													COVID19 (COVID19 (UNKNOWN))	63
COVID19 (COVID19 (JANSSEN))	64													COVID19 (COVID19 (MODERNA))	64	1		1						1		1		COVID19 (COVID19 (PFIZER-BIONTECH))	64													COVID19 (COVID19 (UNKNOWN))	64
COVID19 (COVID19 (JANSSEN))	65													COVID19 (COVID19 (MODERNA))	65													COVID19 (COVID19 (PFIZER-BIONTECH))	65	1	1							1	1			COVID19 (COVID19 (UNKNOWN))	65
COVID19 (COVID19 (JANSSEN))	66													COVID19 (COVID19 (MODERNA))	66													COVID19 (COVID19 (PFIZER-BIONTECH))	66													COVID19 (COVID19 (UNKNOWN))	66
COVID19 (COVID19 (JANSSEN))	67													COVID19 (COVID19 (MODERNA))	67	2	2							2	2			COVID19 (COVID19 (PFIZER-BIONTECH))	67	1	1							1	1			COVID19 (COVID19 (UNKNOWN))	67
COVID19 (COVID19 (JANSSEN))	68													COVID19 (COVID19 (MODERNA))	68	1								1				COVID19 (COVID19 (PFIZER-BIONTECH))	68													COVID19 (COVID19 (UNKNOWN))	68
COVID19 (COVID19 (JANSSEN))	69													COVID19 (COVID19 (MODERNA))	69													COVID19 (COVID19 (PFIZER-BIONTECH))	69													COVID19 (COVID19 (UNKNOWN))	69
COVID19 (COVID19 (JANSSEN))	70													COVID19 (COVID19 (MODERNA))	70													COVID19 (COVID19 (PFIZER-BIONTECH))	70													COVID19 (COVID19 (UNKNOWN))	70
COVID19 (COVID19 (JANSSEN))	71													COVID19 (COVID19 (MODERNA))	71													COVID19 (COVID19 (PFIZER-BIONTECH))	71													COVID19 (COVID19 (UNKNOWN))	71
COVID19 (COVID19 (JANSSEN))	72													COVID19 (COVID19 (MODERNA))	72													COVID19 (COVID19 (PFIZER-BIONTECH))	72													COVID19 (COVID19 (UNKNOWN))	72
COVID19 (COVID19 (JANSSEN))	73													COVID19 (COVID19 (MODERNA))	73													COVID19 (COVID19 (PFIZER-BIONTECH))	73	1		1						1		1		COVID19 (COVID19 (UNKNOWN))	73
COVID19 (COVID19 (JANSSEN))	74													COVID19 (COVID19 (MODERNA))	74													COVID19 (COVID19 (PFIZER-BIONTECH))	74													COVID19 (COVID19 (UNKNOWN))	74
COVID19 (COVID19 (JANSSEN))	75													COVID19 (COVID19 (MODERNA))	75													COVID19 (COVID19 (PFIZER-BIONTECH))	75													COVID19 (COVID19 (UNKNOWN))	75
COVID19 (COVID19 (JANSSEN))	76													COVID19 (COVID19 (MODERNA))	76													COVID19 (COVID19 (PFIZER-BIONTECH))	76													COVID19 (COVID19 (UNKNOWN))	76
COVID19 (COVID19 (JANSSEN))	77													COVID19 (COVID19 (MODERNA))	77													COVID19 (COVID19 (PFIZER-BIONTECH))	77													COVID19 (COVID19 (UNKNOWN))	77
COVID19 (COVID19 (JANSSEN))	78													COVID19 (COVID19 (MODERNA))	78													COVID19 (COVID19 (PFIZER-BIONTECH))	78	1	1							1	1			COVID19 (COVID19 (UNKNOWN))	78
COVID19 (COVID19 (JANSSEN))	79													COVID19 (COVID19 (MODERNA))	79													COVID19 (COVID19 (PFIZER-BIONTECH))	79													COVID19 (COVID19 (UNKNOWN))	79
COVID19 (COVID19 (JANSSEN))	80													COVID19 (COVID19 (MODERNA))	80													COVID19 (COVID19 (PFIZER-BIONTECH))	80													COVID19 (COVID19 (UNKNOWN))	80
COVID19 (COVID19 (JANSSEN))	81													COVID19 (COVID19 (MODERNA))	81													COVID19 (COVID19 (PFIZER-BIONTECH))	81													COVID19 (COVID19 (UNKNOWN))	81
COVID19 (COVID19 (JANSSEN))	82													COVID19 (COVID19 (MODERNA))	82													COVID19 (COVID19 (PFIZER-BIONTECH))	82													COVID19 (COVID19 (UNKNOWN))	82
COVID19 (COVID19 (JANSSEN))	83													COVID19 (COVID19 (MODERNA))	83													COVID19 (COVID19 (PFIZER-BIONTECH))	83	1	1							1	1			COVID19 (COVID19 (UNKNOWN))	83
COVID19 (COVID19 (JANSSEN))	84													COVID19 (COVID19 (MODERNA))	84													COVID19 (COVID19 (PFIZER-BIONTECH))	84													COVID19 (COVID19 (UNKNOWN))	84
COVID19 (COVID19 (JANSSEN))	85													COVID19 (COVID19 (MODERNA))	85													COVID19 (COVID19 (PFIZER-BIONTECH))	85													COVID19 (COVID19 (UNKNOWN))	85
COVID19 (COVID19 (JANSSEN))	86													COVID19 (COVID19 (MODERNA))	86													COVID19 (COVID19 (PFIZER-BIONTECH))	86													COVID19 (COVID19 (UNKNOWN))	86
COVID19 (COVID19 (JANSSEN))	87													COVID19 (COVID19 (MODERNA))	87													COVID19 (COVID19 (PFIZER-BIONTECH))	87													COVID19 (COVID19 (UNKNOWN))	87
COVID19 (COVID19 (JANSSEN))	88													COVID19 (COVID19 (MODERNA))	88													COVID19 (COVID19 (PFIZER-BIONTECH))	88													COVID19 (COVID19 (UNKNOWN))	88
COVID19 (COVID19 (JANSSEN))	89													COVID19 (COVID19 (MODERNA))	89													COVID19 (COVID19 (PFIZER-BIONTECH))	89													COVID19 (COVID19 (UNKNOWN))	89
COVID19 (COVID19 (JANSSEN))	90													COVID19 (COVID19 (MODERNA))	90													COVID19 (COVID19 (PFIZER-BIONTECH))	90													COVID19 (COVID19 (UNKNOWN))	90
COVID19 (COVID19 (JANSSEN))	91													COVID19 (COVID19 (MODERNA))	91													COVID19 (COVID19 (PFIZER-BIONTECH))	91													COVID19 (COVID19 (UNKNOWN))	91
COVID19 (COVID19 (JANSSEN))	92													COVID19 (COVID19 (MODERNA))	92													COVID19 (COVID19 (PFIZER-BIONTECH))	92													COVID19 (COVID19 (UNKNOWN))	92
COVID19 (COVID19 (JANSSEN))	93													COVID19 (COVID19 (MODERNA))	93													COVID19 (COVID19 (PFIZER-BIONTECH))	93													COVID19 (COVID19 (UNKNOWN))	93
COVID19 (COVID19 (JANSSEN))	94													COVID19 (COVID19 (MODERNA))	94													COVID19 (COVID19 (PFIZER-BIONTECH))	94													COVID19 (COVID19 (UNKNOWN))	94
COVID19 (COVID19 (JANSSEN))	95													COVID19 (COVID19 (MODERNA))	95													COVID19 (COVID19 (PFIZER-BIONTECH))	95													COVID19 (COVID19 (UNKNOWN))	95
COVID19 (COVID19 (JANSSEN))	96													COVID19 (COVID19 (MODERNA))	96													COVID19 (COVID19 (PFIZER-BIONTECH))	96													COVID19 (COVID19 (UNKNOWN))	96
COVID19 (COVID19 (JANSSEN))	97													COVID19 (COVID19 (MODERNA))	97													COVID19 (COVID19 (PFIZER-BIONTECH))	97													COVID19 (COVID19 (UNKNOWN))	97
COVID19 (COVID19 (JANSSEN))	98													COVID19 (COVID19 (MODERNA))	98													COVID19 (COVID19 (PFIZER-BIONTECH))	98													COVID19 (COVID19 (UNKNOWN))	98
COVID19 (COVID19 (JANSSEN))	99													COVID19 (COVID19 (MODERNA))	99													COVID19 (COVID19 (PFIZER-BIONTECH))	99													COVID19 (COVID19 (UNKNOWN))	99
COVID19 (COVID19 (JANSSEN))	100													COVID19 (COVID19 (MODERNA))	100													COVID19 (COVID19 (PFIZER-BIONTECH))	100													COVID19 (COVID19 (UNKNOWN))	100
COVID19 (COVID19 (JANSSEN))	101													COVID19 (COVID19 (MODERNA))	101													COVID19 (COVID19 (PFIZER-BIONTECH))	101													COVID19 (COVID19 (UNKNOWN))	101
COVID19 (COVID19 (JANSSEN))	102													COVID19 (COVID19 (MODERNA))	102													COVID19 (COVID19 (PFIZER-BIONTECH))	102													COVID19 (COVID19 (UNKNOWN))	102
COVID19 (COVID19 (JANSSEN))	103													COVID19 (COVID19 (MODERNA))	103													COVID19 (COVID19 (PFIZER-BIONTECH))	103													COVID19 (COVID19 (UNKNOWN))	103
COVID19 (COVID19 (JANSSEN))	104													COVID19 (COVID19 (MODERNA))	104													COVID19 (COVID19 (PFIZER-BIONTECH))	104													COVID19 (COVID19 (UNKNOWN))	104
COVID19 (COVID19 (JANSSEN))	105													COVID19 (COVID19 (MODERNA))	105													COVID19 (COVID19 (PFIZER-BIONTECH))	105													COVID19 (COVID19 (UNKNOWN))	105
COVID19 (COVID19 (JANSSEN))	106													COVID19 (COVID19 (MODERNA))	106													COVID19 (COVID19 (PFIZER-BIONTECH))	106													COVID19 (COVID19 (UNKNOWN))	106
COVID19 (COVID19 (JANSSEN))	107													COVID19 (COVID19 (MODERNA))	107													COVID19 (COVID19 (PFIZER-BIONTECH))	107													COVID19 (COVID19 (UNKNOWN))	107
COVID19 (COVID19 (JANSSEN))	108													COVID19 (COVID19 (MODERNA))	108													COVID19 (COVID19 (PFIZER-BIONTECH))	108													COVID19 (COVID19 (UNKNOWN))	108
COVID19 (COVID19 (JANSSEN))	109													COVID19 (COVID19 (MODERNA))	109													COVID19 (COVID19 (PFIZER-BIONTECH))	109													COVID19 (COVID19 (UNKNOWN))	109
COVID19 (COVID19 (JANSSEN))	110													COVID19 (COVID19 (MODERNA))	110													COVID19 (COVID19 (PFIZER-BIONTECH))	110													COVID19 (COVID19 (UNKNOWN))	110
COVID19 (COVID19 (JANSSEN))	111													COVID19 (COVID19 (MODERNA))	111													COVID19 (COVID19 (PFIZER-BIONTECH))	111													COVID19 (COVID19 (UNKNOWN))	111
COVID19 (COVID19 (JANSSEN))	112													COVID19 (COVID19 (MODERNA))	112													COVID19 (COVID19 (PFIZER-BIONTECH))	112													COVID19 (COVID19 (UNKNOWN))	112
COVID19 (COVID19 (JANSSEN))	113													COVID19 (COVID19 (MODERNA))	113													COVID19 (COVID19 (PFIZER-BIONTECH))	113													COVID19 (COVID19 (UNKNOWN))	113
COVID19 (COVID19 (JANSSEN))	114													COVID19 (COVID19 (MODERNA))	114													COVID19 (COVID19 (PFIZER-BIONTECH))	114													COVID19 (COVID19 (UNKNOWN))	114
COVID19 (COVID19 (JANSSEN))	115													COVID19 (COVID19 (MODERNA))	115													COVID19 (COVID19 (PFIZER-BIONTECH))	115													COVID19 (COVID19 (UNKNOWN))	115
COVID19 (COVID19 (JANSSEN))	116													COVID19 (COVID19 (MODERNA))	116													COVID19 (COVID19 (PFIZER-BIONTECH))	116													COVID19 (COVID19 (UNKNOWN))	116
COVID19 (COVID19 (JANSSEN))	117													COVID19 (COVID19 (MODERNA))	117													COVID19 (COVID19 (PFIZER-BIONTECH))	117													COVID19 (COVID19 (UNKNOWN))	117
COVID19 (COVID19 (JANSSEN))	118													COVID19 (COVID19 (MODERNA))	118													COVID19 (COVID19 (PFIZER-BIONTECH))	118													COVID19 (COVID19 (UNKNOWN))	118
COVID19 (COVID19 (JANSSEN))	119													COVID19 (COVID19 (MODERNA))	119													COVID19 (COVID19 (PFIZER-BIONTECH))	119													COVID19 (COVID19 (UNKNOWN))	119
COVID19 (COVID19 (JANSSEN))	120													COVID19 (COVID19 (MODERNA))	120													COVID19 (COVID19 (PFIZER-BIONTECH))	120													COVID19 (COVID19 (UNKNOWN))	120
Onset report
COVID19 (COVID19 (JANSSEN))	Onset	All	1	2	3	All Male	1 Male	2 Male	3 Male	All Female	1 Female	2 Female	3 Female	COVID19 (COVID19 (MODERNA))	Onset	All	1	2	3	All Male	1 Male	2 Male	3 Male	All Female	1 Female	2 Female	3 Female	COVID19 (COVID19 (PFIZER-BIONTECH))	Onset	All	1	2	3	All Male	1 Male	2 Male	3 Male	All Female	1 Female	2 Female	3 Female	COVID19 (COVID19 (UNKNOWN))	Onset	All	1	2	3	All Male	1 Male
COVID19 (COVID19 (JANSSEN))	0	161	75	1						161	75	1		COVID19 (COVID19 (MODERNA))	0	423	245	117	4	2	2			421	243	117	4	COVID19 (COVID19 (PFIZER-BIONTECH))	0	2366	1139	960	41	6	3	3		2360	1136	957	41	COVID19 (COVID19 (UNKNOWN))	0	3	1
COVID19 (COVID19 (JANSSEN))	1	46	32							46	32			COVID19 (COVID19 (MODERNA))	1	252	128	86	7					252	128	86	7	COVID19 (COVID19 (PFIZER-BIONTECH))	1	717	387	263	6	1	1			716	386	263	6	COVID19 (COVID19 (UNKNOWN))	1	1		1
COVID19 (COVID19 (JANSSEN))	2	31	27	1		2	2			29	25	1		COVID19 (COVID19 (MODERNA))	2	116	64	37	1					116	64	37	1	COVID19 (COVID19 (PFIZER-BIONTECH))	2	444	258	140	3					444	258	140	3	COVID19 (COVID19 (UNKNOWN))	2	1		1
COVID19 (COVID19 (JANSSEN))	3	23	20							23	20			COVID19 (COVID19 (MODERNA))	3	97	37	34	4	2	1			95	36	34	4	COVID19 (COVID19 (PFIZER-BIONTECH))	3	281	161	90	3					281	161	90	3	COVID19 (COVID19 (UNKNOWN))	3
COVID19 (COVID19 (JANSSEN))	4	9	8							9	8			COVID19 (COVID19 (MODERNA))	4	55	29	16						55	29	16		COVID19 (COVID19 (PFIZER-BIONTECH))	4	236	127	87	1					236	127	87	1	COVID19 (COVID19 (UNKNOWN))	4	1	1
COVID19 (COVID19 (JANSSEN))	5	8	4							8	4			COVID19 (COVID19 (MODERNA))	5	45	20	16		1		1		44	20	15		COVID19 (COVID19 (PFIZER-BIONTECH))	5	253	154	70	1					253	154	70	1	COVID19 (COVID19 (UNKNOWN))	5	1
COVID19 (COVID19 (JANSSEN))	6	8	7			1	1			7	6			COVID19 (COVID19 (MODERNA))	6	43	24	12						43	24	12		COVID19 (COVID19 (PFIZER-BIONTECH))	6	251	167	61						251	167	61		COVID19 (COVID19 (UNKNOWN))	6
COVID19 (COVID19 (JANSSEN))	7	7	7							7	7			COVID19 (COVID19 (MODERNA))	7	77	48	19	2					77	48	19	2	COVID19 (COVID19 (PFIZER-BIONTECH))	7	217	129	72	1					217	129	72	1	COVID19 (COVID19 (UNKNOWN))	7
COVID19 (COVID19 (JANSSEN))	8	6	3							6	3			COVID19 (COVID19 (MODERNA))	8	29	16	10						29	16	10		COVID19 (COVID19 (PFIZER-BIONTECH))	8	162	93	56	1					162	93	56	1	COVID19 (COVID19 (UNKNOWN))	8
COVID19 (COVID19 (JANSSEN))	9	8	8							8	8			COVID19 (COVID19 (MODERNA))	9	29	16	11						29	16	11		COVID19 (COVID19 (PFIZER-BIONTECH))	9	115	69	39						115	69	39		COVID19 (COVID19 (UNKNOWN))	9	1	1
COVID19 (COVID19 (JANSSEN))	10	10	9							10	9			COVID19 (COVID19 (MODERNA))	10	30	13	12						30	13	12		COVID19 (COVID19 (PFIZER-BIONTECH))	10	101	61	33	1	1	1			100	60	33	1	COVID19 (COVID19 (UNKNOWN))	10
COVID19 (COVID19 (JANSSEN))	11	4	3							4	3			COVID19 (COVID19 (MODERNA))	11	18	8	7						18	8	7		COVID19 (COVID19 (PFIZER-BIONTECH))	11	97	64	24	1					97	64	24	1	COVID19 (COVID19 (UNKNOWN))	11
COVID19 (COVID19 (JANSSEN))	12	3	3							3	3			COVID19 (COVID19 (MODERNA))	12	24	12	10						24	12	10		COVID19 (COVID19 (PFIZER-BIONTECH))	12	83	47	23	1					83	47	23	1	COVID19 (COVID19 (UNKNOWN))	12
COVID19 (COVID19 (JANSSEN))	13	10	9							10	9			COVID19 (COVID19 (MODERNA))	13	29	13	12						29	13	12		COVID19 (COVID19 (PFIZER-BIONTECH))	13	114	70	38	1					114	70	38	1	COVID19 (COVID19 (UNKNOWN))	13
COVID19 (COVID19 (JANSSEN))	14	5	5							5	5			COVID19 (COVID19 (MODERNA))	14	42	22	15						42	22	15		COVID19 (COVID19 (PFIZER-BIONTECH))	14	117	79	34	1					117	79	34	1	COVID19 (COVID19 (UNKNOWN))	14
COVID19 (COVID19 (JANSSEN))	15	2	1							2	1			COVID19 (COVID19 (MODERNA))	15	28	12	13						28	12	13		COVID19 (COVID19 (PFIZER-BIONTECH))	15	98	54	35	1					98	54	35	1	COVID19 (COVID19 (UNKNOWN))	15
COVID19 (COVID19 (JANSSEN))	16	6	6							6	6			COVID19 (COVID19 (MODERNA))	16	26	13	9		1				25	13	9		COVID19 (COVID19 (PFIZER-BIONTECH))	16	58	36	18						58	36	18		COVID19 (COVID19 (UNKNOWN))	16
COVID19 (COVID19 (JANSSEN))	17	3	1							3	1			COVID19 (COVID19 (MODERNA))	17	24	14	9						24	14	9		COVID19 (COVID19 (PFIZER-BIONTECH))	17	67	39	23		1	1			66	38	23		COVID19 (COVID19 (UNKNOWN))	17
COVID19 (COVID19 (JANSSEN))	18	5	3							5	3			COVID19 (COVID19 (MODERNA))	18	23	8	12						23	8	12		COVID19 (COVID19 (PFIZER-BIONTECH))	18	70	41	23						70	41	23		COVID19 (COVID19 (UNKNOWN))	18
COVID19 (COVID19 (JANSSEN))	19	7	5							7	5			COVID19 (COVID19 (MODERNA))	19	16	8	6						16	8	6		COVID19 (COVID19 (PFIZER-BIONTECH))	19	69	41	22						69	41	22		COVID19 (COVID19 (UNKNOWN))	19
COVID19 (COVID19 (JANSSEN))	20	4	4							4	4			COVID19 (COVID19 (MODERNA))	20	23	10	11						23	10	11		COVID19 (COVID19 (PFIZER-BIONTECH))	20	61	28	26						61	28	26		COVID19 (COVID19 (UNKNOWN))	20
COVID19 (COVID19 (JANSSEN))	21	7	5							7	5			COVID19 (COVID19 (MODERNA))	21	16	9	3						16	9	3		COVID19 (COVID19 (PFIZER-BIONTECH))	21	92	48	38						92	48	38		COVID19 (COVID19 (UNKNOWN))	21
COVID19 (COVID19 (JANSSEN))	22	2	2							2	2			COVID19 (COVID19 (MODERNA))	22	19	9	8						19	9	8		COVID19 (COVID19 (PFIZER-BIONTECH))	22	51	25	20						51	25	20		COVID19 (COVID19 (UNKNOWN))	22
COVID19 (COVID19 (JANSSEN))	23	9	6							9	6			COVID19 (COVID19 (MODERNA))	23	16	10	5						16	10	5		COVID19 (COVID19 (PFIZER-BIONTECH))	23	60	33	24						60	33	24		COVID19 (COVID19 (UNKNOWN))	23
COVID19 (COVID19 (JANSSEN))	24	3	2							3	2			COVID19 (COVID19 (MODERNA))	24	15	8	5						15	8	5		COVID19 (COVID19 (PFIZER-BIONTECH))	24	51	38	9						51	38	9		COVID19 (COVID19 (UNKNOWN))	24
COVID19 (COVID19 (JANSSEN))	25	4	4							4	4			COVID19 (COVID19 (MODERNA))	25	7	3	4						7	3	4		COVID19 (COVID19 (PFIZER-BIONTECH))	25	37	23	12						37	23	12		COVID19 (COVID19 (UNKNOWN))	25
COVID19 (COVID19 (JANSSEN))	26													COVID19 (COVID19 (MODERNA))	26	7	2	2						7	2	2		COVID19 (COVID19 (PFIZER-BIONTECH))	26	37	17	13						37	17	13		COVID19 (COVID19 (UNKNOWN))	26
COVID19 (COVID19 (JANSSEN))	27	1	1							1	1			COVID19 (COVID19 (MODERNA))	27	15	9	6						15	9	6		COVID19 (COVID19 (PFIZER-BIONTECH))	27	41	24	17						41	24	17		COVID19 (COVID19 (UNKNOWN))	27
COVID19 (COVID19 (JANSSEN))	28	4	4							4	4			COVID19 (COVID19 (MODERNA))	28	30	17	10						30	17	10		COVID19 (COVID19 (PFIZER-BIONTECH))	28	37	17	15						37	17	15		COVID19 (COVID19 (UNKNOWN))	28
COVID19 (COVID19 (JANSSEN))	29	1								1				COVID19 (COVID19 (MODERNA))	29	15	11	4						15	11	4		COVID19 (COVID19 (PFIZER-BIONTECH))	29	39	22	14						39	22	14		COVID19 (COVID19 (UNKNOWN))	29
COVID19 (COVID19 (JANSSEN))	30	1	1							1	1			COVID19 (COVID19 (MODERNA))	30	17	8	6						17	8	6		COVID19 (COVID19 (PFIZER-BIONTECH))	30	47	22	19	1					47	22	19	1	COVID19 (COVID19 (UNKNOWN))	30
COVID19 (COVID19 (JANSSEN))	31	10	7	1						10	7	1		COVID19 (COVID19 (MODERNA))	31	15	7	7						15	7	7		COVID19 (COVID19 (PFIZER-BIONTECH))	31	52	19	27						52	19	27		COVID19 (COVID19 (UNKNOWN))	31
COVID19 (COVID19 (JANSSEN))	32													COVID19 (COVID19 (MODERNA))	32	17	7	8						17	7	8		COVID19 (COVID19 (PFIZER-BIONTECH))	32	26	15	9						26	15	9		COVID19 (COVID19 (UNKNOWN))	32
COVID19 (COVID19 (JANSSEN))	33	4	3							4	3			COVID19 (COVID19 (MODERNA))	33	10	5	4						10	5	4		COVID19 (COVID19 (PFIZER-BIONTECH))	33	22	8	11						22	8	11		COVID19 (COVID19 (UNKNOWN))	33
COVID19 (COVID19 (JANSSEN))	34	2	2							2	2			COVID19 (COVID19 (MODERNA))	34	11	8	3						11	8	3		COVID19 (COVID19 (PFIZER-BIONTECH))	34	25	13	7	1					25	13	7	1	COVID19 (COVID19 (UNKNOWN))	34
COVID19 (COVID19 (JANSSEN))	35	2	1							2	1			COVID19 (COVID19 (MODERNA))	35	12	6	5						12	6	5		COVID19 (COVID19 (PFIZER-BIONTECH))	35	31	17	11						31	17	11		COVID19 (COVID19 (UNKNOWN))	35
COVID19 (COVID19 (JANSSEN))	36													COVID19 (COVID19 (MODERNA))	36	11	5	6						11	5	6		COVID19 (COVID19 (PFIZER-BIONTECH))	36	18	9	8						18	9	8		COVID19 (COVID19 (UNKNOWN))	36
COVID19 (COVID19 (JANSSEN))	37	2	2							2	2			COVID19 (COVID19 (MODERNA))	37	11	3	8						11	3	8		COVID19 (COVID19 (PFIZER-BIONTECH))	37	27	16	11						27	16	11		COVID19 (COVID19 (UNKNOWN))	37
COVID19 (COVID19 (JANSSEN))	38	1								1				COVID19 (COVID19 (MODERNA))	38	9	2	4	1					9	2	4	1	COVID19 (COVID19 (PFIZER-BIONTECH))	38	18	11	6						18	11	6		COVID19 (COVID19 (UNKNOWN))	38
COVID19 (COVID19 (JANSSEN))	39	4	4							4	4			COVID19 (COVID19 (MODERNA))	39	6	5	1						6	5	1		COVID19 (COVID19 (PFIZER-BIONTECH))	39	17	8	9						17	8	9		COVID19 (COVID19 (UNKNOWN))	39
COVID19 (COVID19 (JANSSEN))	40	2	2							2	2			COVID19 (COVID19 (MODERNA))	40	5	3	2						5	3	2		COVID19 (COVID19 (PFIZER-BIONTECH))	40	19	6	11						19	6	11		COVID19 (COVID19 (UNKNOWN))	40
COVID19 (COVID19 (JANSSEN))	41	1	1							1	1			COVID19 (COVID19 (MODERNA))	41	9	3	6						9	3	6		COVID19 (COVID19 (PFIZER-BIONTECH))	41	17	8	8						17	8	8		COVID19 (COVID19 (UNKNOWN))	41
COVID19 (COVID19 (JANSSEN))	42													COVID19 (COVID19 (MODERNA))	42	1	1							1	1			COVID19 (COVID19 (PFIZER-BIONTECH))	42	15	3	10						15	3	10		COVID19 (COVID19 (UNKNOWN))	42
COVID19 (COVID19 (JANSSEN))	43	1								1				COVID19 (COVID19 (MODERNA))	43	2		2						2		2		COVID19 (COVID19 (PFIZER-BIONTECH))	43	20	8	12						20	8	12		COVID19 (COVID19 (UNKNOWN))	43
COVID19 (COVID19 (JANSSEN))	44	1	1							1	1			COVID19 (COVID19 (MODERNA))	44	2	1	1						2	1	1		COVID19 (COVID19 (PFIZER-BIONTECH))	44	8	3	5						8	3	5		COVID19 (COVID19 (UNKNOWN))	44
COVID19 (COVID19 (JANSSEN))	45	1				1								COVID19 (COVID19 (MODERNA))	45	3	2	1						3	2	1		COVID19 (COVID19 (PFIZER-BIONTECH))	45	9	5	3						9	5	3		COVID19 (COVID19 (UNKNOWN))	45
COVID19 (COVID19 (JANSSEN))	46													COVID19 (COVID19 (MODERNA))	46	2		1						2		1		COVID19 (COVID19 (PFIZER-BIONTECH))	46	8	3	5						8	3	5		COVID19 (COVID19 (UNKNOWN))	46
COVID19 (COVID19 (JANSSEN))	47													COVID19 (COVID19 (MODERNA))	47	6	4	2						6	4	2		COVID19 (COVID19 (PFIZER-BIONTECH))	47	12	7	5						12	7	5		COVID19 (COVID19 (UNKNOWN))	47
COVID19 (COVID19 (JANSSEN))	48													COVID19 (COVID19 (MODERNA))	48	6	3	3						6	3	3		COVID19 (COVID19 (PFIZER-BIONTECH))	48	6	2	4						6	2	4		COVID19 (COVID19 (UNKNOWN))	48
COVID19 (COVID19 (JANSSEN))	49													COVID19 (COVID19 (MODERNA))	49	2	1	1						2	1	1		COVID19 (COVID19 (PFIZER-BIONTECH))	49	12	5	5						12	5	5		COVID19 (COVID19 (UNKNOWN))	49
COVID19 (COVID19 (JANSSEN))	50	1	1							1	1			COVID19 (COVID19 (MODERNA))	50	4	2	2						4	2	2		COVID19 (COVID19 (PFIZER-BIONTECH))	50	8	3	4						8	3	4		COVID19 (COVID19 (UNKNOWN))	50
COVID19 (COVID19 (JANSSEN))	51	1								1				COVID19 (COVID19 (MODERNA))	51	6	2	3						6	2	3		COVID19 (COVID19 (PFIZER-BIONTECH))	51	5	3	2						5	3	2		COVID19 (COVID19 (UNKNOWN))	51
COVID19 (COVID19 (JANSSEN))	52													COVID19 (COVID19 (MODERNA))	52	4	2	1						4	2	1		COVID19 (COVID19 (PFIZER-BIONTECH))	52	14	6	5						14	6	5		COVID19 (COVID19 (UNKNOWN))	52
COVID19 (COVID19 (JANSSEN))	53	2	1							2	1			COVID19 (COVID19 (MODERNA))	53	6	2	3						6	2	3		COVID19 (COVID19 (PFIZER-BIONTECH))	53	10	2	7						10	2	7		COVID19 (COVID19 (UNKNOWN))	53	1
COVID19 (COVID19 (JANSSEN))	54	1								1				COVID19 (COVID19 (MODERNA))	54	5	3	2						5	3	2		COVID19 (COVID19 (PFIZER-BIONTECH))	54	7	3	4						7	3	4		COVID19 (COVID19 (UNKNOWN))	54
COVID19 (COVID19 (JANSSEN))	55	1	1							1	1			COVID19 (COVID19 (MODERNA))	55	2		2						2		2		COVID19 (COVID19 (PFIZER-BIONTECH))	55	7	3	4						7	3	4		COVID19 (COVID19 (UNKNOWN))	55
COVID19 (COVID19 (JANSSEN))	56	2	2							2	2			COVID19 (COVID19 (MODERNA))	56	1		1						1		1		COVID19 (COVID19 (PFIZER-BIONTECH))	56	9	4	5						9	4	5		COVID19 (COVID19 (UNKNOWN))	56
COVID19 (COVID19 (JANSSEN))	57													COVID19 (COVID19 (MODERNA))	57	2		2						2		2		COVID19 (COVID19 (PFIZER-BIONTECH))	57	3	1	2						3	1	2		COVID19 (COVID19 (UNKNOWN))	57
COVID19 (COVID19 (JANSSEN))	58													COVID19 (COVID19 (MODERNA))	58	1		1						1		1		COVID19 (COVID19 (PFIZER-BIONTECH))	58	6	4	1						6	4	1		COVID19 (COVID19 (UNKNOWN))	58
COVID19 (COVID19 (JANSSEN))	59													COVID19 (COVID19 (MODERNA))	59	5	3	2						5	3	2		COVID19 (COVID19 (PFIZER-BIONTECH))	59	9	5	4						9	5	4		COVID19 (COVID19 (UNKNOWN))	59
COVID19 (COVID19 (JANSSEN))	60	1	1							1	1			COVID19 (COVID19 (MODERNA))	60	6	3	2						6	3	2		COVID19 (COVID19 (PFIZER-BIONTECH))	60	5	2	3						5	2	3		COVID19 (COVID19 (UNKNOWN))	60
COVID19 (COVID19 (JANSSEN))	61	2	1			1				1	1			COVID19 (COVID19 (MODERNA))	61	6	1	2						6	1	2		COVID19 (COVID19 (PFIZER-BIONTECH))	61	5	4	1						5	4	1		COVID19 (COVID19 (UNKNOWN))	61
COVID19 (COVID19 (JANSSEN))	62													COVID19 (COVID19 (MODERNA))	62													COVID19 (COVID19 (PFIZER-BIONTECH))	62													COVID19 (COVID19 (UNKNOWN))	62
COVID19 (COVID19 (JANSSEN))	63													COVID19 (COVID19 (MODERNA))	63	1	1							1	1			COVID19 (COVID19 (PFIZER-BIONTECH))	63	10	4	4						10	4	4		COVID19 (COVID19 (UNKNOWN))	63
COVID19 (COVID19 (JANSSEN))	64													COVID19 (COVID19 (MODERNA))	64	3	2	1						3	2	1		COVID19 (COVID19 (PFIZER-BIONTECH))	64	2	2							2	2			COVID19 (COVID19 (UNKNOWN))	64
COVID19 (COVID19 (JANSSEN))	65													COVID19 (COVID19 (MODERNA))	65	4	1	3						4	1	3		COVID19 (COVID19 (PFIZER-BIONTECH))	65	4	1	1						4	1	1		COVID19 (COVID19 (UNKNOWN))	65
COVID19 (COVID19 (JANSSEN))	66													COVID19 (COVID19 (MODERNA))	66	3		3						3		3		COVID19 (COVID19 (PFIZER-BIONTECH))	66	7	2	4						7	2	4		COVID19 (COVID19 (UNKNOWN))	66
COVID19 (COVID19 (JANSSEN))	67													COVID19 (COVID19 (MODERNA))	67	2	1	1						2	1	1		COVID19 (COVID19 (PFIZER-BIONTECH))	67													COVID19 (COVID19 (UNKNOWN))	67
COVID19 (COVID19 (JANSSEN))	68	1	1							1	1			COVID19 (COVID19 (MODERNA))	68													COVID19 (COVID19 (PFIZER-BIONTECH))	68	7	4	3						7	4	3		COVID19 (COVID19 (UNKNOWN))	68
COVID19 (COVID19 (JANSSEN))	69	1	1							1	1			COVID19 (COVID19 (MODERNA))	69	1	1							1	1			COVID19 (COVID19 (PFIZER-BIONTECH))	69	4	1	2						4	1	2		COVID19 (COVID19 (UNKNOWN))	69
COVID19 (COVID19 (JANSSEN))	70	1								1				COVID19 (COVID19 (MODERNA))	70	5	2	3						5	2	3		COVID19 (COVID19 (PFIZER-BIONTECH))	70	8	3	5						8	3	5		COVID19 (COVID19 (UNKNOWN))	70
COVID19 (COVID19 (JANSSEN))	71													COVID19 (COVID19 (MODERNA))	71	1	1							1	1			COVID19 (COVID19 (PFIZER-BIONTECH))	71	3	1	2						3	1	2		COVID19 (COVID19 (UNKNOWN))	71
COVID19 (COVID19 (JANSSEN))	72													COVID19 (COVID19 (MODERNA))	72	3		1						3		1		COVID19 (COVID19 (PFIZER-BIONTECH))	72	1		1						1		1		COVID19 (COVID19 (UNKNOWN))	72
COVID19 (COVID19 (JANSSEN))	73													COVID19 (COVID19 (MODERNA))	73													COVID19 (COVID19 (PFIZER-BIONTECH))	73	5	1	4						5	1	4		COVID19 (COVID19 (UNKNOWN))	73
COVID19 (COVID19 (JANSSEN))	74	1	1							1	1			COVID19 (COVID19 (MODERNA))	74	2		1						2		1		COVID19 (COVID19 (PFIZER-BIONTECH))	74	3	1	2						3	1	2		COVID19 (COVID19 (UNKNOWN))	74
COVID19 (COVID19 (JANSSEN))	75													COVID19 (COVID19 (MODERNA))	75	3		2						3		2		COVID19 (COVID19 (PFIZER-BIONTECH))	75	4		4						4		4		COVID19 (COVID19 (UNKNOWN))	75
COVID19 (COVID19 (JANSSEN))	76													COVID19 (COVID19 (MODERNA))	76	2	2							2	2			COVID19 (COVID19 (PFIZER-BIONTECH))	76													COVID19 (COVID19 (UNKNOWN))	76
COVID19 (COVID19 (JANSSEN))	77													COVID19 (COVID19 (MODERNA))	77	1		1						1		1		COVID19 (COVID19 (PFIZER-BIONTECH))	77	3	1	2						3	1	2		COVID19 (COVID19 (UNKNOWN))	77
COVID19 (COVID19 (JANSSEN))	78													COVID19 (COVID19 (MODERNA))	78	1		1						1		1		COVID19 (COVID19 (PFIZER-BIONTECH))	78	3	1	2						3	1	2		COVID19 (COVID19 (UNKNOWN))	78
COVID19 (COVID19 (JANSSEN))	79													COVID19 (COVID19 (MODERNA))	79	2	1	1						2	1	1		COVID19 (COVID19 (PFIZER-BIONTECH))	79	2	1	1						2	1	1		COVID19 (COVID19 (UNKNOWN))	79
COVID19 (COVID19 (JANSSEN))	80													COVID19 (COVID19 (MODERNA))	80	1	1							1	1			COVID19 (COVID19 (PFIZER-BIONTECH))	80													COVID19 (COVID19 (UNKNOWN))	80
COVID19 (COVID19 (JANSSEN))	81													COVID19 (COVID19 (MODERNA))	81	1		1						1		1		COVID19 (COVID19 (PFIZER-BIONTECH))	81	7	3	3						7	3	3		COVID19 (COVID19 (UNKNOWN))	81
COVID19 (COVID19 (JANSSEN))	82													COVID19 (COVID19 (MODERNA))	82	2	1	1						2	1	1		COVID19 (COVID19 (PFIZER-BIONTECH))	82	2		1						2		1		COVID19 (COVID19 (UNKNOWN))	82
COVID19 (COVID19 (JANSSEN))	83													COVID19 (COVID19 (MODERNA))	83													COVID19 (COVID19 (PFIZER-BIONTECH))	83	1	1							1	1			COVID19 (COVID19 (UNKNOWN))	83
COVID19 (COVID19 (JANSSEN))	84													COVID19 (COVID19 (MODERNA))	84													COVID19 (COVID19 (PFIZER-BIONTECH))	84	2	1	1						2	1	1		COVID19 (COVID19 (UNKNOWN))	84
COVID19 (COVID19 (JANSSEN))	85													COVID19 (COVID19 (MODERNA))	85	2	2							2	2			COVID19 (COVID19 (PFIZER-BIONTECH))	85	4	1	3						4	1	3		COVID19 (COVID19 (UNKNOWN))	85
COVID19 (COVID19 (JANSSEN))	86													COVID19 (COVID19 (MODERNA))	86													COVID19 (COVID19 (PFIZER-BIONTECH))	86	2		2						2		2		COVID19 (COVID19 (UNKNOWN))	86
COVID19 (COVID19 (JANSSEN))	87													COVID19 (COVID19 (MODERNA))	87													COVID19 (COVID19 (PFIZER-BIONTECH))	87	4	2	2						4	2	2		COVID19 (COVID19 (UNKNOWN))	87
COVID19 (COVID19 (JANSSEN))	88													COVID19 (COVID19 (MODERNA))	88	1		1						1		1		COVID19 (COVID19 (PFIZER-BIONTECH))	88													COVID19 (COVID19 (UNKNOWN))	88
COVID19 (COVID19 (JANSSEN))	89													COVID19 (COVID19 (MODERNA))	89	1	1							1	1			COVID19 (COVID19 (PFIZER-BIONTECH))	89	8	2	6						8	2	6		COVID19 (COVID19 (UNKNOWN))	89
COVID19 (COVID19 (JANSSEN))	90													COVID19 (COVID19 (MODERNA))	90	4	2	2						4	2	2		COVID19 (COVID19 (PFIZER-BIONTECH))	90	3	1	1						3	1	1		COVID19 (COVID19 (UNKNOWN))	90
COVID19 (COVID19 (JANSSEN))	91													COVID19 (COVID19 (MODERNA))	91	1		1						1		1		COVID19 (COVID19 (PFIZER-BIONTECH))	91	5	2	3						5	2	3		COVID19 (COVID19 (UNKNOWN))	91
COVID19 (COVID19 (JANSSEN))	92	1								1				COVID19 (COVID19 (MODERNA))	92	3	2	1						3	2	1		COVID19 (COVID19 (PFIZER-BIONTECH))	92	9	4	3						9	4	3		COVID19 (COVID19 (UNKNOWN))	92
COVID19 (COVID19 (JANSSEN))	93													COVID19 (COVID19 (MODERNA))	93	3	1	2						3	1	2		COVID19 (COVID19 (PFIZER-BIONTECH))	93	3	2	1						3	2	1		COVID19 (COVID19 (UNKNOWN))	93
COVID19 (COVID19 (JANSSEN))	94													COVID19 (COVID19 (MODERNA))	94													COVID19 (COVID19 (PFIZER-BIONTECH))	94	1	1							1	1			COVID19 (COVID19 (UNKNOWN))	94
COVID19 (COVID19 (JANSSEN))	95													COVID19 (COVID19 (MODERNA))	95	1		1						1		1		COVID19 (COVID19 (PFIZER-BIONTECH))	95	2	1	1						2	1	1		COVID19 (COVID19 (UNKNOWN))	95
COVID19 (COVID19 (JANSSEN))	96													COVID19 (COVID19 (MODERNA))	96													COVID19 (COVID19 (PFIZER-BIONTECH))	96	2	1							2	1			COVID19 (COVID19 (UNKNOWN))	96
COVID19 (COVID19 (JANSSEN))	97													COVID19 (COVID19 (MODERNA))	97													COVID19 (COVID19 (PFIZER-BIONTECH))	97	3	1	2						3	1	2		COVID19 (COVID19 (UNKNOWN))	97
COVID19 (COVID19 (JANSSEN))	98													COVID19 (COVID19 (MODERNA))	98													COVID19 (COVID19 (PFIZER-BIONTECH))	98													COVID19 (COVID19 (UNKNOWN))	98
COVID19 (COVID19 (JANSSEN))	99													COVID19 (COVID19 (MODERNA))	99	2	1	1						2	1	1		COVID19 (COVID19 (PFIZER-BIONTECH))	99	1		1						1		1		COVID19 (COVID19 (UNKNOWN))	99
COVID19 (COVID19 (JANSSEN))	100													COVID19 (COVID19 (MODERNA))	100	2	1	1						2	1	1		COVID19 (COVID19 (PFIZER-BIONTECH))	100	1	1							1	1			COVID19 (COVID19 (UNKNOWN))	100
COVID19 (COVID19 (JANSSEN))	101													COVID19 (COVID19 (MODERNA))	101	2		2						2		2		COVID19 (COVID19 (PFIZER-BIONTECH))	101	2	1	1						2	1	1		COVID19 (COVID19 (UNKNOWN))	101
COVID19 (COVID19 (JANSSEN))	102													COVID19 (COVID19 (MODERNA))	102													COVID19 (COVID19 (PFIZER-BIONTECH))	102													COVID19 (COVID19 (UNKNOWN))	102
COVID19 (COVID19 (JANSSEN))	103													COVID19 (COVID19 (MODERNA))	103	1		1						1		1		COVID19 (COVID19 (PFIZER-BIONTECH))	103	1		1						1		1		COVID19 (COVID19 (UNKNOWN))	103
COVID19 (COVID19 (JANSSEN))	104													COVID19 (COVID19 (MODERNA))	104													COVID19 (COVID19 (PFIZER-BIONTECH))	104													COVID19 (COVID19 (UNKNOWN))	104
COVID19 (COVID19 (JANSSEN))	105													COVID19 (COVID19 (MODERNA))	105													COVID19 (COVID19 (PFIZER-BIONTECH))	105	1		1						1		1		COVID19 (COVID19 (UNKNOWN))	105
COVID19 (COVID19 (JANSSEN))	106													COVID19 (COVID19 (MODERNA))	106	1		1						1		1		COVID19 (COVID19 (PFIZER-BIONTECH))	106	4	2	2						4	2	2		COVID19 (COVID19 (UNKNOWN))	106
COVID19 (COVID19 (JANSSEN))	107													COVID19 (COVID19 (MODERNA))	107	2	1	1						2	1	1		COVID19 (COVID19 (PFIZER-BIONTECH))	107	3	2	1						3	2	1		COVID19 (COVID19 (UNKNOWN))	107
COVID19 (COVID19 (JANSSEN))	108													COVID19 (COVID19 (MODERNA))	108	1		1						1		1		COVID19 (COVID19 (PFIZER-BIONTECH))	108													COVID19 (COVID19 (UNKNOWN))	108
COVID19 (COVID19 (JANSSEN))	109													COVID19 (COVID19 (MODERNA))	109	1	1							1	1			COVID19 (COVID19 (PFIZER-BIONTECH))	109													COVID19 (COVID19 (UNKNOWN))	109
COVID19 (COVID19 (JANSSEN))	110													COVID19 (COVID19 (MODERNA))	110													COVID19 (COVID19 (PFIZER-BIONTECH))	110	1	1							1	1			COVID19 (COVID19 (UNKNOWN))	110
COVID19 (COVID19 (JANSSEN))	111													COVID19 (COVID19 (MODERNA))	111													COVID19 (COVID19 (PFIZER-BIONTECH))	111													COVID19 (COVID19 (UNKNOWN))	111
COVID19 (COVID19 (JANSSEN))	112													COVID19 (COVID19 (MODERNA))	112	2	1	1						2	1	1		COVID19 (COVID19 (PFIZER-BIONTECH))	112													COVID19 (COVID19 (UNKNOWN))	112
COVID19 (COVID19 (JANSSEN))	113													COVID19 (COVID19 (MODERNA))	113													COVID19 (COVID19 (PFIZER-BIONTECH))	113	3	1	2						3	1	2		COVID19 (COVID19 (UNKNOWN))	113
COVID19 (COVID19 (JANSSEN))	114													COVID19 (COVID19 (MODERNA))	114	2	1	1						2	1	1		COVID19 (COVID19 (PFIZER-BIONTECH))	114	2	1	1						2	1	1		COVID19 (COVID19 (UNKNOWN))	114
COVID19 (COVID19 (JANSSEN))	115													COVID19 (COVID19 (MODERNA))	115													COVID19 (COVID19 (PFIZER-BIONTECH))	115	2	1							2	1			COVID19 (COVID19 (UNKNOWN))	115
COVID19 (COVID19 (JANSSEN))	116													COVID19 (COVID19 (MODERNA))	116													COVID19 (COVID19 (PFIZER-BIONTECH))	116													COVID19 (COVID19 (UNKNOWN))	116
COVID19 (COVID19 (JANSSEN))	117													COVID19 (COVID19 (MODERNA))	117													COVID19 (COVID19 (PFIZER-BIONTECH))	117													COVID19 (COVID19 (UNKNOWN))	117
COVID19 (COVID19 (JANSSEN))	118													COVID19 (COVID19 (MODERNA))	118	1		1						1		1		COVID19 (COVID19 (PFIZER-BIONTECH))	118	1		1						1		1		COVID19 (COVID19 (UNKNOWN))	118
COVID19 (COVID19 (JANSSEN))	119	1	1							1	1			COVID19 (COVID19 (MODERNA))	119													COVID19 (COVID19 (PFIZER-BIONTECH))	119													COVID19 (COVID19 (UNKNOWN))	119
COVID19 (COVID19 (JANSSEN))	120													COVID19 (COVID19 (MODERNA))	120													COVID19 (COVID19 (PFIZER-BIONTECH))	120													COVID19 (COVID19 (UNKNOWN))	120
[truncated: 160 more columns]

## Sheet: All_intermenstrual
Dose report
Vaccine	All	1	2	3	4	5	6	7+	UNK	N/A
COVID19 (COVID19 (PFIZER-BIONTECH))	1805	920	688	20					177
COVID19 (COVID19 (MODERNA))	571	285	203	5					78
COVID19 (COVID19 (JANSSEN))	110	65	1						37	7
VACCINE NOT SPECIFIED (NO BRAND NAME)	16	3	4						9
COVID19 (COVID19 (UNKNOWN))	3	3
HPV (GARDASIL 9)	3	1	1	1
BCG (NO BRAND NAME)	1								1
INFLUENZA (SEASONAL) (NO BRAND NAME)	1								1
Total	2510
COVID-19	2489
COVID-19 %	0.991633
Age report
BCG (NO BRAND NAME)	Age	All	1	2	3	All Male	1 Male	2 Male	3 Male	All Female	1 Female	2 Female	3 Female	COVID19 (COVID19 (JANSSEN))	Age	All	1	2	3	All Male	1 Male	2 Male	3 Male	All Female	1 Female	2 Female	3 Female	COVID19 (COVID19 (MODERNA))	Age	All	1	2	3	All Male	1 Male	2 Male	3 Male	All Female	1 Female	2 Female	3 Female	COVID19 (COVID19 (PFIZER-BIONTECH))	Age	All	1	2	3	All Male	1 Male
BCG (NO BRAND NAME)	0													COVID19 (COVID19 (JANSSEN))	0	12								12				COVID19 (COVID19 (MODERNA))	0	14	11	2						9	8			COVID19 (COVID19 (PFIZER-BIONTECH))	0	807	461	270	3	1
BCG (NO BRAND NAME)	1													COVID19 (COVID19 (JANSSEN))	1													COVID19 (COVID19 (MODERNA))	1													COVID19 (COVID19 (PFIZER-BIONTECH))	1
BCG (NO BRAND NAME)	2													COVID19 (COVID19 (JANSSEN))	2													COVID19 (COVID19 (MODERNA))	2													COVID19 (COVID19 (PFIZER-BIONTECH))	2
BCG (NO BRAND NAME)	3													COVID19 (COVID19 (JANSSEN))	3													COVID19 (COVID19 (MODERNA))	3													COVID19 (COVID19 (PFIZER-BIONTECH))	3
BCG (NO BRAND NAME)	4													COVID19 (COVID19 (JANSSEN))	4													COVID19 (COVID19 (MODERNA))	4													COVID19 (COVID19 (PFIZER-BIONTECH))	4
BCG (NO BRAND NAME)	5													COVID19 (COVID19 (JANSSEN))	5													COVID19 (COVID19 (MODERNA))	5													COVID19 (COVID19 (PFIZER-BIONTECH))	5
BCG (NO BRAND NAME)	6													COVID19 (COVID19 (JANSSEN))	6													COVID19 (COVID19 (MODERNA))	6													COVID19 (COVID19 (PFIZER-BIONTECH))	6
BCG (NO BRAND NAME)	7													COVID19 (COVID19 (JANSSEN))	7													COVID19 (COVID19 (MODERNA))	7													COVID19 (COVID19 (PFIZER-BIONTECH))	7
BCG (NO BRAND NAME)	8													COVID19 (COVID19 (JANSSEN))	8													COVID19 (COVID19 (MODERNA))	8													COVID19 (COVID19 (PFIZER-BIONTECH))	8
BCG (NO BRAND NAME)	9													COVID19 (COVID19 (JANSSEN))	9													COVID19 (COVID19 (MODERNA))	9													COVID19 (COVID19 (PFIZER-BIONTECH))	9
BCG (NO BRAND NAME)	10													COVID19 (COVID19 (JANSSEN))	10													COVID19 (COVID19 (MODERNA))	10													COVID19 (COVID19 (PFIZER-BIONTECH))	10
BCG (NO BRAND NAME)	11													COVID19 (COVID19 (JANSSEN))	11													COVID19 (COVID19 (MODERNA))	11													COVID19 (COVID19 (PFIZER-BIONTECH))	11	1	1
BCG (NO BRAND NAME)	12													COVID19 (COVID19 (JANSSEN))	12													COVID19 (COVID19 (MODERNA))	12													COVID19 (COVID19 (PFIZER-BIONTECH))	12	1	1
BCG (NO BRAND NAME)	13													COVID19 (COVID19 (JANSSEN))	13													COVID19 (COVID19 (MODERNA))	13													COVID19 (COVID19 (PFIZER-BIONTECH))	13	7	4	3
BCG (NO BRAND NAME)	14													COVID19 (COVID19 (JANSSEN))	14													COVID19 (COVID19 (MODERNA))	14													COVID19 (COVID19 (PFIZER-BIONTECH))	14	3	1	1
BCG (NO BRAND NAME)	15													COVID19 (COVID19 (JANSSEN))	15													COVID19 (COVID19 (MODERNA))	15													COVID19 (COVID19 (PFIZER-BIONTECH))	15	3	2
BCG (NO BRAND NAME)	16													COVID19 (COVID19 (JANSSEN))	16													COVID19 (COVID19 (MODERNA))	16	1								1				COVID19 (COVID19 (PFIZER-BIONTECH))	16	5	2	3
BCG (NO BRAND NAME)	17													COVID19 (COVID19 (JANSSEN))	17													COVID19 (COVID19 (MODERNA))	17													COVID19 (COVID19 (PFIZER-BIONTECH))	17	8	1	3		1
BCG (NO BRAND NAME)	18													COVID19 (COVID19 (JANSSEN))	18													COVID19 (COVID19 (MODERNA))	18	2	1							2	1			COVID19 (COVID19 (PFIZER-BIONTECH))	18	8	4	2
BCG (NO BRAND NAME)	19													COVID19 (COVID19 (JANSSEN))	19													COVID19 (COVID19 (MODERNA))	19	1		1						1		1		COVID19 (COVID19 (PFIZER-BIONTECH))	19	5	4	1
BCG (NO BRAND NAME)	20													COVID19 (COVID19 (JANSSEN))	20	1	1							1	1			COVID19 (COVID19 (MODERNA))	20	7	4	2						7	4	2		COVID19 (COVID19 (PFIZER-BIONTECH))	20	5	2	3
BCG (NO BRAND NAME)	21													COVID19 (COVID19 (JANSSEN))	21	1	1							1	1			COVID19 (COVID19 (MODERNA))	21	2	2							2	2			COVID19 (COVID19 (PFIZER-BIONTECH))	21	5	2	2
BCG (NO BRAND NAME)	22													COVID19 (COVID19 (JANSSEN))	22	3	3							3	3			COVID19 (COVID19 (MODERNA))	22	10	7	3						10	7	3		COVID19 (COVID19 (PFIZER-BIONTECH))	22	5	3	1
BCG (NO BRAND NAME)	23													COVID19 (COVID19 (JANSSEN))	23													COVID19 (COVID19 (MODERNA))	23	9	5	1						9	5	1		COVID19 (COVID19 (PFIZER-BIONTECH))	23	13	8	4
BCG (NO BRAND NAME)	24													COVID19 (COVID19 (JANSSEN))	24	1								1				COVID19 (COVID19 (MODERNA))	24	12	7	5						12	7	5		COVID19 (COVID19 (PFIZER-BIONTECH))	24	22	9	10
BCG (NO BRAND NAME)	25													COVID19 (COVID19 (JANSSEN))	25	3	3							3	3			COVID19 (COVID19 (MODERNA))	25	6	1	3						6	1	3		COVID19 (COVID19 (PFIZER-BIONTECH))	25	29	14	14
BCG (NO BRAND NAME)	26													COVID19 (COVID19 (JANSSEN))	26	1								1				COVID19 (COVID19 (MODERNA))	26	20	9	8						20	9	8		COVID19 (COVID19 (PFIZER-BIONTECH))	26	24	10	11	1
BCG (NO BRAND NAME)	27													COVID19 (COVID19 (JANSSEN))	27	4	3							4	3			COVID19 (COVID19 (MODERNA))	27	18	12	5		1	1			17	11	5		COVID19 (COVID19 (PFIZER-BIONTECH))	27	20	10	9
BCG (NO BRAND NAME)	28													COVID19 (COVID19 (JANSSEN))	28	6	2							6	2			COVID19 (COVID19 (MODERNA))	28	15	9	5						15	9	5		COVID19 (COVID19 (PFIZER-BIONTECH))	28	30	13	13	1
BCG (NO BRAND NAME)	29													COVID19 (COVID19 (JANSSEN))	29	3	3							3	3			COVID19 (COVID19 (MODERNA))	29	16	7	7						16	7	7		COVID19 (COVID19 (PFIZER-BIONTECH))	29	34	15	17
BCG (NO BRAND NAME)	30													COVID19 (COVID19 (JANSSEN))	30	1	1							1	1			COVID19 (COVID19 (MODERNA))	30	32	15	12						32	15	12		COVID19 (COVID19 (PFIZER-BIONTECH))	30	41	18	15
BCG (NO BRAND NAME)	31													COVID19 (COVID19 (JANSSEN))	31	3	1							3	1			COVID19 (COVID19 (MODERNA))	31	27	16	8						27	16	8		COVID19 (COVID19 (PFIZER-BIONTECH))	31	41	20	13	2
BCG (NO BRAND NAME)	32													COVID19 (COVID19 (JANSSEN))	32	3	2							3	2			COVID19 (COVID19 (MODERNA))	32	25	10	9						25	10	9		COVID19 (COVID19 (PFIZER-BIONTECH))	32	33	21	10
BCG (NO BRAND NAME)	33													COVID19 (COVID19 (JANSSEN))	33	7	6							7	6			COVID19 (COVID19 (MODERNA))	33	35	16	12	1					35	16	12	1	COVID19 (COVID19 (PFIZER-BIONTECH))	33	32	13	15
BCG (NO BRAND NAME)	34													COVID19 (COVID19 (JANSSEN))	34	3	2							3	2			COVID19 (COVID19 (MODERNA))	34	21	10	7						21	10	7		COVID19 (COVID19 (PFIZER-BIONTECH))	34	51	25	24
BCG (NO BRAND NAME)	35													COVID19 (COVID19 (JANSSEN))	35	3	3							3	3			COVID19 (COVID19 (MODERNA))	35	24	13	4						24	13	4		COVID19 (COVID19 (PFIZER-BIONTECH))	35	34	16	16
BCG (NO BRAND NAME)	36													COVID19 (COVID19 (JANSSEN))	36	3	1							3	1			COVID19 (COVID19 (MODERNA))	36	23	14	9						23	14	9		COVID19 (COVID19 (PFIZER-BIONTECH))	36	57	29	26	1
BCG (NO BRAND NAME)	37													COVID19 (COVID19 (JANSSEN))	37	3	2	1						3	2	1		COVID19 (COVID19 (MODERNA))	37	18	8	7						18	8	7		COVID19 (COVID19 (PFIZER-BIONTECH))	37	34	17	12
BCG (NO BRAND NAME)	38													COVID19 (COVID19 (JANSSEN))	38	3	2							3	2			COVID19 (COVID19 (MODERNA))	38	24	10	12	1					24	10	12	1	COVID19 (COVID19 (PFIZER-BIONTECH))	38	52	25	23	1
BCG (NO BRAND NAME)	39													COVID19 (COVID19 (JANSSEN))	39	5	5							5	5			COVID19 (COVID19 (MODERNA))	39	12	4	7		1	1			11	3	7		COVID19 (COVID19 (PFIZER-BIONTECH))	39	36	20	12	1
BCG (NO BRAND NAME)	40													COVID19 (COVID19 (JANSSEN))	40	3	3							3	3			COVID19 (COVID19 (MODERNA))	40	18	6	8						18	6	8		COVID19 (COVID19 (PFIZER-BIONTECH))	40	44	23	12	1
BCG (NO BRAND NAME)	41													COVID19 (COVID19 (JANSSEN))	41	3	1							3	1			COVID19 (COVID19 (MODERNA))	41	12	6	4						12	6	4		COVID19 (COVID19 (PFIZER-BIONTECH))	41	33	13	15
BCG (NO BRAND NAME)	42													COVID19 (COVID19 (JANSSEN))	42	5	4							5	4			COVID19 (COVID19 (MODERNA))	42	16	8	6	1					16	8	6	1	COVID19 (COVID19 (PFIZER-BIONTECH))	42	27	10	13	2
BCG (NO BRAND NAME)	43													COVID19 (COVID19 (JANSSEN))	43	2	1							2	1			COVID19 (COVID19 (MODERNA))	43	21	12	9						21	12	9		COVID19 (COVID19 (PFIZER-BIONTECH))	43	32	11	14	2
BCG (NO BRAND NAME)	44	1								1				COVID19 (COVID19 (JANSSEN))	44	2	2							2	2			COVID19 (COVID19 (MODERNA))	44	23	16	6						23	16	6		COVID19 (COVID19 (PFIZER-BIONTECH))	44	33	9	18	1
BCG (NO BRAND NAME)	45													COVID19 (COVID19 (JANSSEN))	45	4	4							4	4			COVID19 (COVID19 (MODERNA))	45	8	4	2						8	4	2		COVID19 (COVID19 (PFIZER-BIONTECH))	45	34	16	11	1
BCG (NO BRAND NAME)	46													COVID19 (COVID19 (JANSSEN))	46	1								1				COVID19 (COVID19 (MODERNA))	46	17	10	5						17	10	5		COVID19 (COVID19 (PFIZER-BIONTECH))	46	21	11	9	1
BCG (NO BRAND NAME)	47													COVID19 (COVID19 (JANSSEN))	47	1								1				COVID19 (COVID19 (MODERNA))	47	11	5	4						11	5	4		COVID19 (COVID19 (PFIZER-BIONTECH))	47	24	12	10
BCG (NO BRAND NAME)	48													COVID19 (COVID19 (JANSSEN))	48	4	1							4	1			COVID19 (COVID19 (MODERNA))	48	15	6	5	1					14	5	5	1	COVID19 (COVID19 (PFIZER-BIONTECH))	48	23	11	10
BCG (NO BRAND NAME)	49													COVID19 (COVID19 (JANSSEN))	49	4	3							4	3			COVID19 (COVID19 (MODERNA))	49	10	2	6						10	2	6		COVID19 (COVID19 (PFIZER-BIONTECH))	49	10	2	5	2
BCG (NO BRAND NAME)	50													COVID19 (COVID19 (JANSSEN))	50	5	3							5	3			COVID19 (COVID19 (MODERNA))	50	14	5	6						14	5	6		COVID19 (COVID19 (PFIZER-BIONTECH))	50	13	4	7
BCG (NO BRAND NAME)	51													COVID19 (COVID19 (JANSSEN))	51	3	1							3	1			COVID19 (COVID19 (MODERNA))	51	12	7	3						12	7	3		COVID19 (COVID19 (PFIZER-BIONTECH))	51	16	7	8
BCG (NO BRAND NAME)	52													COVID19 (COVID19 (JANSSEN))	52	1	1							1	1			COVID19 (COVID19 (MODERNA))	52	3	1	2						3	1	2		COVID19 (COVID19 (PFIZER-BIONTECH))	52	7	2	3
BCG (NO BRAND NAME)	53													COVID19 (COVID19 (JANSSEN))	53													COVID19 (COVID19 (MODERNA))	53	1	1							1	1			COVID19 (COVID19 (PFIZER-BIONTECH))	53	5	1	1
BCG (NO BRAND NAME)	54													COVID19 (COVID19 (JANSSEN))	54	1								1				COVID19 (COVID19 (MODERNA))	54	6	1	4						6	1	4		COVID19 (COVID19 (PFIZER-BIONTECH))	54	13	6	6
BCG (NO BRAND NAME)	55													COVID19 (COVID19 (JANSSEN))	55													COVID19 (COVID19 (MODERNA))	55	4	2	2						4	2	2		COVID19 (COVID19 (PFIZER-BIONTECH))	55	2	2
BCG (NO BRAND NAME)	56													COVID19 (COVID19 (JANSSEN))	56	1								1				COVID19 (COVID19 (MODERNA))	56	1	1							1	1			COVID19 (COVID19 (PFIZER-BIONTECH))	56	5	3	2
BCG (NO BRAND NAME)	57													COVID19 (COVID19 (JANSSEN))	57													COVID19 (COVID19 (MODERNA))	57													COVID19 (COVID19 (PFIZER-BIONTECH))	57	6	2	4
BCG (NO BRAND NAME)	58													COVID19 (COVID19 (JANSSEN))	58													COVID19 (COVID19 (MODERNA))	58													COVID19 (COVID19 (PFIZER-BIONTECH))	58
BCG (NO BRAND NAME)	59													COVID19 (COVID19 (JANSSEN))	59													COVID19 (COVID19 (MODERNA))	59													COVID19 (COVID19 (PFIZER-BIONTECH))	59
BCG (NO BRAND NAME)	60													COVID19 (COVID19 (JANSSEN))	60													COVID19 (COVID19 (MODERNA))	60													COVID19 (COVID19 (PFIZER-BIONTECH))	60	1		1
BCG (NO BRAND NAME)	61													COVID19 (COVID19 (JANSSEN))	61													COVID19 (COVID19 (MODERNA))	61													COVID19 (COVID19 (PFIZER-BIONTECH))	61
BCG (NO BRAND NAME)	62													COVID19 (COVID19 (JANSSEN))	62													COVID19 (COVID19 (MODERNA))	62													COVID19 (COVID19 (PFIZER-BIONTECH))	62	2	1	1
BCG (NO BRAND NAME)	63													COVID19 (COVID19 (JANSSEN))	63													COVID19 (COVID19 (MODERNA))	63													COVID19 (COVID19 (PFIZER-BIONTECH))	63
BCG (NO BRAND NAME)	64													COVID19 (COVID19 (JANSSEN))	64													COVID19 (COVID19 (MODERNA))	64	2	1	1						2	1	1		COVID19 (COVID19 (PFIZER-BIONTECH))	64
BCG (NO BRAND NAME)	65													COVID19 (COVID19 (JANSSEN))	65													COVID19 (COVID19 (MODERNA))	65													COVID19 (COVID19 (PFIZER-BIONTECH))	65	2	2
BCG (NO BRAND NAME)	66													COVID19 (COVID19 (JANSSEN))	66													COVID19 (COVID19 (MODERNA))	66	1		1						1		1		COVID19 (COVID19 (PFIZER-BIONTECH))	66
BCG (NO BRAND NAME)	67													COVID19 (COVID19 (JANSSEN))	67													COVID19 (COVID19 (MODERNA))	67													COVID19 (COVID19 (PFIZER-BIONTECH))	67
BCG (NO BRAND NAME)	68													COVID19 (COVID19 (JANSSEN))	68													COVID19 (COVID19 (MODERNA))	68													COVID19 (COVID19 (PFIZER-BIONTECH))	68
BCG (NO BRAND NAME)	69													COVID19 (COVID19 (JANSSEN))	69	1								1				COVID19 (COVID19 (MODERNA))	69													COVID19 (COVID19 (PFIZER-BIONTECH))	69
BCG (NO BRAND NAME)	70													COVID19 (COVID19 (JANSSEN))	70													COVID19 (COVID19 (MODERNA))	70													COVID19 (COVID19 (PFIZER-BIONTECH))	70
BCG (NO BRAND NAME)	71													COVID19 (COVID19 (JANSSEN))	71													COVID19 (COVID19 (MODERNA))	71													COVID19 (COVID19 (PFIZER-BIONTECH))	71	1		1
BCG (NO BRAND NAME)	72													COVID19 (COVID19 (JANSSEN))	72													COVID19 (COVID19 (MODERNA))	72													COVID19 (COVID19 (PFIZER-BIONTECH))	72	3	1	2
BCG (NO BRAND NAME)	73													COVID19 (COVID19 (JANSSEN))	73													COVID19 (COVID19 (MODERNA))	73													COVID19 (COVID19 (PFIZER-BIONTECH))	73
BCG (NO BRAND NAME)	74													COVID19 (COVID19 (JANSSEN))	74													COVID19 (COVID19 (MODERNA))	74													COVID19 (COVID19 (PFIZER-BIONTECH))	74
BCG (NO BRAND NAME)	75													COVID19 (COVID19 (JANSSEN))	75													COVID19 (COVID19 (MODERNA))	75													COVID19 (COVID19 (PFIZER-BIONTECH))	75
BCG (NO BRAND NAME)	76													COVID19 (COVID19 (JANSSEN))	76													COVID19 (COVID19 (MODERNA))	76													COVID19 (COVID19 (PFIZER-BIONTECH))	76
BCG (NO BRAND NAME)	77													COVID19 (COVID19 (JANSSEN))	77													COVID19 (COVID19 (MODERNA))	77													COVID19 (COVID19 (PFIZER-BIONTECH))	77
BCG (NO BRAND NAME)	78													COVID19 (COVID19 (JANSSEN))	78													COVID19 (COVID19 (MODERNA))	78													COVID19 (COVID19 (PFIZER-BIONTECH))	78	1		1
BCG (NO BRAND NAME)	79													COVID19 (COVID19 (JANSSEN))	79													COVID19 (COVID19 (MODERNA))	79													COVID19 (COVID19 (PFIZER-BIONTECH))	79
BCG (NO BRAND NAME)	80													COVID19 (COVID19 (JANSSEN))	80													COVID19 (COVID19 (MODERNA))	80													COVID19 (COVID19 (PFIZER-BIONTECH))	80
BCG (NO BRAND NAME)	81													COVID19 (COVID19 (JANSSEN))	81													COVID19 (COVID19 (MODERNA))	81													COVID19 (COVID19 (PFIZER-BIONTECH))	81
BCG (NO BRAND NAME)	82													COVID19 (COVID19 (JANSSEN))	82													COVID19 (COVID19 (MODERNA))	82	1			1					1			1	COVID19 (COVID19 (PFIZER-BIONTECH))	82
BCG (NO BRAND NAME)	83													COVID19 (COVID19 (JANSSEN))	83													COVID19 (COVID19 (MODERNA))	83													COVID19 (COVID19 (PFIZER-BIONTECH))	83
BCG (NO BRAND NAME)	84													COVID19 (COVID19 (JANSSEN))	84													COVID19 (COVID19 (MODERNA))	84													COVID19 (COVID19 (PFIZER-BIONTECH))	84
BCG (NO BRAND NAME)	85													COVID19 (COVID19 (JANSSEN))	85													COVID19 (COVID19 (MODERNA))	85													COVID19 (COVID19 (PFIZER-BIONTECH))	85
BCG (NO BRAND NAME)	86													COVID19 (COVID19 (JANSSEN))	86													COVID19 (COVID19 (MODERNA))	86													COVID19 (COVID19 (PFIZER-BIONTECH))	86
BCG (NO BRAND NAME)	87													COVID19 (COVID19 (JANSSEN))	87													COVID19 (COVID19 (MODERNA))	87	1								1				COVID19 (COVID19 (PFIZER-BIONTECH))	87
BCG (NO BRAND NAME)	88													COVID19 (COVID19 (JANSSEN))	88													COVID19 (COVID19 (MODERNA))	88													COVID19 (COVID19 (PFIZER-BIONTECH))	88
BCG (NO BRAND NAME)	89													COVID19 (COVID19 (JANSSEN))	89													COVID19 (COVID19 (MODERNA))	89													COVID19 (COVID19 (PFIZER-BIONTECH))	89
BCG (NO BRAND NAME)	90													COVID19 (COVID19 (JANSSEN))	90													COVID19 (COVID19 (MODERNA))	90													COVID19 (COVID19 (PFIZER-BIONTECH))	90
BCG (NO BRAND NAME)	91													COVID19 (COVID19 (JANSSEN))	91													COVID19 (COVID19 (MODERNA))	91													COVID19 (COVID19 (PFIZER-BIONTECH))	91
BCG (NO BRAND NAME)	92													COVID19 (COVID19 (JANSSEN))	92													COVID19 (COVID19 (MODERNA))	92													COVID19 (COVID19 (PFIZER-BIONTECH))	92
BCG (NO BRAND NAME)	93													COVID19 (COVID19 (JANSSEN))	93													COVID19 (COVID19 (MODERNA))	93													COVID19 (COVID19 (PFIZER-BIONTECH))	93
BCG (NO BRAND NAME)	94													COVID19 (COVID19 (JANSSEN))	94													COVID19 (COVID19 (MODERNA))	94													COVID19 (COVID19 (PFIZER-BIONTECH))	94
BCG (NO BRAND NAME)	95													COVID19 (COVID19 (JANSSEN))	95													COVID19 (COVID19 (MODERNA))	95													COVID19 (COVID19 (PFIZER-BIONTECH))	95
BCG (NO BRAND NAME)	96													COVID19 (COVID19 (JANSSEN))	96													COVID19 (COVID19 (MODERNA))	96													COVID19 (COVID19 (PFIZER-BIONTECH))	96
BCG (NO BRAND NAME)	97													COVID19 (COVID19 (JANSSEN))	97													COVID19 (COVID19 (MODERNA))	97													COVID19 (COVID19 (PFIZER-BIONTECH))	97
BCG (NO BRAND NAME)	98													COVID19 (COVID19 (JANSSEN))	98													COVID19 (COVID19 (MODERNA))	98													COVID19 (COVID19 (PFIZER-BIONTECH))	98
BCG (NO BRAND NAME)	99													COVID19 (COVID19 (JANSSEN))	99													COVID19 (COVID19 (MODERNA))	99													COVID19 (COVID19 (PFIZER-BIONTECH))	99
BCG (NO BRAND NAME)	100													COVID19 (COVID19 (JANSSEN))	100													COVID19 (COVID19 (MODERNA))	100													COVID19 (COVID19 (PFIZER-BIONTECH))	100
BCG (NO BRAND NAME)	101													COVID19 (COVID19 (JANSSEN))	101													COVID19 (COVID19 (MODERNA))	101													COVID19 (COVID19 (PFIZER-BIONTECH))	101	1		1
BCG (NO BRAND NAME)	102													COVID19 (COVID19 (JANSSEN))	102													COVID19 (COVID19 (MODERNA))	102													COVID19 (COVID19 (PFIZER-BIONTECH))	102
BCG (NO BRAND NAME)	103													COVID19 (COVID19 (JANSSEN))	103													COVID19 (COVID19 (MODERNA))	103													COVID19 (COVID19 (PFIZER-BIONTECH))	103
BCG (NO BRAND NAME)	104													COVID19 (COVID19 (JANSSEN))	104													COVID19 (COVID19 (MODERNA))	104													COVID19 (COVID19 (PFIZER-BIONTECH))	104
BCG (NO BRAND NAME)	105													COVID19 (COVID19 (JANSSEN))	105													COVID19 (COVID19 (MODERNA))	105													COVID19 (COVID19 (PFIZER-BIONTECH))	105
BCG (NO BRAND NAME)	106													COVID19 (COVID19 (JANSSEN))	106													COVID19 (COVID19 (MODERNA))	106													COVID19 (COVID19 (PFIZER-BIONTECH))	106
BCG (NO BRAND NAME)	107													COVID19 (COVID19 (JANSSEN))	107													COVID19 (COVID19 (MODERNA))	107													COVID19 (COVID19 (PFIZER-BIONTECH))	107
BCG (NO BRAND NAME)	108													COVID19 (COVID19 (JANSSEN))	108													COVID19 (COVID19 (MODERNA))	108													COVID19 (COVID19 (PFIZER-BIONTECH))	108
BCG (NO BRAND NAME)	109													COVID19 (COVID19 (JANSSEN))	109													COVID19 (COVID19 (MODERNA))	109													COVID19 (COVID19 (PFIZER-BIONTECH))	109
BCG (NO BRAND NAME)	110													COVID19 (COVID19 (JANSSEN))	110													COVID19 (COVID19 (MODERNA))	110													COVID19 (COVID19 (PFIZER-BIONTECH))	110
BCG (NO BRAND NAME)	111													COVID19 (COVID19 (JANSSEN))	111													COVID19 (COVID19 (MODERNA))	111													COVID19 (COVID19 (PFIZER-BIONTECH))	111
BCG (NO BRAND NAME)	112													COVID19 (COVID19 (JANSSEN))	112													COVID19 (COVID19 (MODERNA))	112													COVID19 (COVID19 (PFIZER-BIONTECH))	112
BCG (NO BRAND NAME)	113													COVID19 (COVID19 (JANSSEN))	113													COVID19 (COVID19 (MODERNA))	113													COVID19 (COVID19 (PFIZER-BIONTECH))	113
BCG (NO BRAND NAME)	114													COVID19 (COVID19 (JANSSEN))	114													COVID19 (COVID19 (MODERNA))	114													COVID19 (COVID19 (PFIZER-BIONTECH))	114
BCG (NO BRAND NAME)	115													COVID19 (COVID19 (JANSSEN))	115													COVID19 (COVID19 (MODERNA))	115													COVID19 (COVID19 (PFIZER-BIONTECH))	115
BCG (NO BRAND NAME)	116													COVID19 (COVID19 (JANSSEN))	116													COVID19 (COVID19 (MODERNA))	116													COVID19 (COVID19 (PFIZER-BIONTECH))	116
BCG (NO BRAND NAME)	117													COVID19 (COVID19 (JANSSEN))	117													COVID19 (COVID19 (MODERNA))	117													COVID19 (COVID19 (PFIZER-BIONTECH))	117
BCG (NO BRAND NAME)	118													COVID19 (COVID19 (JANSSEN))	118													COVID19 (COVID19 (MODERNA))	118													COVID19 (COVID19 (PFIZER-BIONTECH))	118
BCG (NO BRAND NAME)	119													COVID19 (COVID19 (JANSSEN))	119													COVID19 (COVID19 (MODERNA))	119													COVID19 (COVID19 (PFIZER-BIONTECH))	119
BCG (NO BRAND NAME)	120													COVID19 (COVID19 (JANSSEN))	120													COVID19 (COVID19 (MODERNA))	120													COVID19 (COVID19 (PFIZER-BIONTECH))	120
Onset report
BCG (NO BRAND NAME)	Onset	All	1	2	3	All Male	1 Male	2 Male	3 Male	All Female	1 Female	2 Female	3 Female	COVID19 (COVID19 (JANSSEN))	Onset	All	1	2	3	All Male	1 Male	2 Male	3 Male	All Female	1 Female	2 Female	3 Female	COVID19 (COVID19 (MODERNA))	Onset	All	1	2	3	All Male	1 Male	2 Male	3 Male	All Female	1 Female	2 Female	3 Female	COVID19 (COVID19 (PFIZER-BIONTECH))	Onset	All	1	2	3	All Male	1 Male
BCG (NO BRAND NAME)	0	1								1				COVID19 (COVID19 (JANSSEN))	0	44	19							44	19			COVID19 (COVID19 (MODERNA))	0	131	77	33		1	1			130	76	33		COVID19 (COVID19 (PFIZER-BIONTECH))	0	579	260	252	15
BCG (NO BRAND NAME)	1													COVID19 (COVID19 (JANSSEN))	1	14	7	1						14	7	1		COVID19 (COVID19 (MODERNA))	1	76	38	24	1	1	1			75	37	24	1	COVID19 (COVID19 (PFIZER-BIONTECH))	1	283	156	87	2	2
BCG (NO BRAND NAME)	2													COVID19 (COVID19 (JANSSEN))	2	8	5							8	5			COVID19 (COVID19 (MODERNA))	2	37	17	14	1					37	17	14	1	COVID19 (COVID19 (PFIZER-BIONTECH))	2	124	75	40
BCG (NO BRAND NAME)	3													COVID19 (COVID19 (JANSSEN))	3	5	2							5	2			COVID19 (COVID19 (MODERNA))	3	34	19	9	2					34	19	9	2	COVID19 (COVID19 (PFIZER-BIONTECH))	3	79	45	28
BCG (NO BRAND NAME)	4													COVID19 (COVID19 (JANSSEN))	4	2	2							2	2			COVID19 (COVID19 (MODERNA))	4	23	12	8						23	12	8		COVID19 (COVID19 (PFIZER-BIONTECH))	4	67	38	22
BCG (NO BRAND NAME)	5													COVID19 (COVID19 (JANSSEN))	5													COVID19 (COVID19 (MODERNA))	5	10	3	3	1					10	3	3	1	COVID19 (COVID19 (PFIZER-BIONTECH))	5	51	27	21
BCG (NO BRAND NAME)	6													COVID19 (COVID19 (JANSSEN))	6													COVID19 (COVID19 (MODERNA))	6	13	10	3						13	10	3		COVID19 (COVID19 (PFIZER-BIONTECH))	6	43	30	9
BCG (NO BRAND NAME)	7													COVID19 (COVID19 (JANSSEN))	7	3	1							3	1			COVID19 (COVID19 (MODERNA))	7	18	9	8						18	9	8		COVID19 (COVID19 (PFIZER-BIONTECH))	7	60	34	22
BCG (NO BRAND NAME)	8													COVID19 (COVID19 (JANSSEN))	8	3	2							3	2			COVID19 (COVID19 (MODERNA))	8	10	5	2						10	5	2		COVID19 (COVID19 (PFIZER-BIONTECH))	8	46	24	20
BCG (NO BRAND NAME)	9													COVID19 (COVID19 (JANSSEN))	9	2	2							2	2			COVID19 (COVID19 (MODERNA))	9	6	2	2						6	2	2		COVID19 (COVID19 (PFIZER-BIONTECH))	9	36	24	7
BCG (NO BRAND NAME)	10													COVID19 (COVID19 (JANSSEN))	10	1	1							1	1			COVID19 (COVID19 (MODERNA))	10	2		1						2		1		COVID19 (COVID19 (PFIZER-BIONTECH))	10	27	13	10
BCG (NO BRAND NAME)	11													COVID19 (COVID19 (JANSSEN))	11	2	2							2	2			COVID19 (COVID19 (MODERNA))	11	9	5	3						9	5	3		COVID19 (COVID19 (PFIZER-BIONTECH))	11	32	20	9
BCG (NO BRAND NAME)	12													COVID19 (COVID19 (JANSSEN))	12													COVID19 (COVID19 (MODERNA))	12	11	4	6						11	4	6		COVID19 (COVID19 (PFIZER-BIONTECH))	12	21	12	8
BCG (NO BRAND NAME)	13													COVID19 (COVID19 (JANSSEN))	13													COVID19 (COVID19 (MODERNA))	13	3	1	1						3	1	1		COVID19 (COVID19 (PFIZER-BIONTECH))	13	15	8	6
BCG (NO BRAND NAME)	14													COVID19 (COVID19 (JANSSEN))	14	1	1							1	1			COVID19 (COVID19 (MODERNA))	14	11	7	4						11	7	4		COVID19 (COVID19 (PFIZER-BIONTECH))	14	27	13	12
BCG (NO BRAND NAME)	15													COVID19 (COVID19 (JANSSEN))	15	1	1							1	1			COVID19 (COVID19 (MODERNA))	15	8	1	6						8	1	6		COVID19 (COVID19 (PFIZER-BIONTECH))	15	19	9	7
BCG (NO BRAND NAME)	16													COVID19 (COVID19 (JANSSEN))	16	2	2							2	2			COVID19 (COVID19 (MODERNA))	16	7	1	4						7	1	4		COVID19 (COVID19 (PFIZER-BIONTECH))	16	14	7	3
BCG (NO BRAND NAME)	17													COVID19 (COVID19 (JANSSEN))	17	1	1							1	1			COVID19 (COVID19 (MODERNA))	17	5	3	2						5	3	2		COVID19 (COVID19 (PFIZER-BIONTECH))	17	12	6	5
BCG (NO BRAND NAME)	18													COVID19 (COVID19 (JANSSEN))	18	1	1							1	1			COVID19 (COVID19 (MODERNA))	18	7	4	3						7	4	3		COVID19 (COVID19 (PFIZER-BIONTECH))	18	16	6	6
BCG (NO BRAND NAME)	19													COVID19 (COVID19 (JANSSEN))	19													COVID19 (COVID19 (MODERNA))	19	6	2	3						6	2	3		COVID19 (COVID19 (PFIZER-BIONTECH))	19	13	10	1
BCG (NO BRAND NAME)	20													COVID19 (COVID19 (JANSSEN))	20													COVID19 (COVID19 (MODERNA))	20	4	1	3						4	1	3		COVID19 (COVID19 (PFIZER-BIONTECH))	20	6	2	3
BCG (NO BRAND NAME)	21													COVID19 (COVID19 (JANSSEN))	21	2	2							2	2			COVID19 (COVID19 (MODERNA))	21	2	1	1						2	1	1		COVID19 (COVID19 (PFIZER-BIONTECH))	21	18	8	7
BCG (NO BRAND NAME)	22													COVID19 (COVID19 (JANSSEN))	22	1	1							1	1			COVID19 (COVID19 (MODERNA))	22	2	2							2	2			COVID19 (COVID19 (PFIZER-BIONTECH))	22	15	6	6
BCG (NO BRAND NAME)	23													COVID19 (COVID19 (JANSSEN))	23	4	2							4	2			COVID19 (COVID19 (MODERNA))	23	1	1							1	1			COVID19 (COVID19 (PFIZER-BIONTECH))	23	11	7	3
BCG (NO BRAND NAME)	24													COVID19 (COVID19 (JANSSEN))	24													COVID19 (COVID19 (MODERNA))	24	8	3	3						8	3	3		COVID19 (COVID19 (PFIZER-BIONTECH))	24	12	9	2
BCG (NO BRAND NAME)	25													COVID19 (COVID19 (JANSSEN))	25	1	1							1	1			COVID19 (COVID19 (MODERNA))	25	2		1						2		1		COVID19 (COVID19 (PFIZER-BIONTECH))	25	12	7	5
BCG (NO BRAND NAME)	26													COVID19 (COVID19 (JANSSEN))	26													COVID19 (COVID19 (MODERNA))	26	5	2	1						5	2	1		COVID19 (COVID19 (PFIZER-BIONTECH))	26	8	4	2	1
BCG (NO BRAND NAME)	27													COVID19 (COVID19 (JANSSEN))	27													COVID19 (COVID19 (MODERNA))	27	1		1						1		1		COVID19 (COVID19 (PFIZER-BIONTECH))	27	8	5	2
BCG (NO BRAND NAME)	28													COVID19 (COVID19 (JANSSEN))	28	4	4							4	4			COVID19 (COVID19 (MODERNA))	28	9	5	4						9	5	4		COVID19 (COVID19 (PFIZER-BIONTECH))	28	15	4	9
BCG (NO BRAND NAME)	29													COVID19 (COVID19 (JANSSEN))	29													COVID19 (COVID19 (MODERNA))	29	7	6	1						7	6	1		COVID19 (COVID19 (PFIZER-BIONTECH))	29	3	1	2
BCG (NO BRAND NAME)	30													COVID19 (COVID19 (JANSSEN))	30	1	1							1	1			COVID19 (COVID19 (MODERNA))	30	4	3	1						4	3	1		COVID19 (COVID19 (PFIZER-BIONTECH))	30	7	2	4	1
BCG (NO BRAND NAME)	31													COVID19 (COVID19 (JANSSEN))	31	1	1							1	1			COVID19 (COVID19 (MODERNA))	31	4		4						4		4		COVID19 (COVID19 (PFIZER-BIONTECH))	31	10	2	8
BCG (NO BRAND NAME)	32													COVID19 (COVID19 (JANSSEN))	32													COVID19 (COVID19 (MODERNA))	32	3	2	1						3	2	1		COVID19 (COVID19 (PFIZER-BIONTECH))	32	4	2	1
BCG (NO BRAND NAME)	33													COVID19 (COVID19 (JANSSEN))	33	2	1							2	1			COVID19 (COVID19 (MODERNA))	33	4	2	2						4	2	2		COVID19 (COVID19 (PFIZER-BIONTECH))	33	5	3	2
BCG (NO BRAND NAME)	34													COVID19 (COVID19 (JANSSEN))	34													COVID19 (COVID19 (MODERNA))	34	3	2	1						3	2	1		COVID19 (COVID19 (PFIZER-BIONTECH))	34	3	1	2
BCG (NO BRAND NAME)	35													COVID19 (COVID19 (JANSSEN))	35	1								1				COVID19 (COVID19 (MODERNA))	35	3	2	1						3	2	1		COVID19 (COVID19 (PFIZER-BIONTECH))	35	2	1	1
BCG (NO BRAND NAME)	36													COVID19 (COVID19 (JANSSEN))	36													COVID19 (COVID19 (MODERNA))	36	2	1	1						2	1	1		COVID19 (COVID19 (PFIZER-BIONTECH))	36	4		2	1
BCG (NO BRAND NAME)	37													COVID19 (COVID19 (JANSSEN))	37													COVID19 (COVID19 (MODERNA))	37	7	3	4						7	3	4		COVID19 (COVID19 (PFIZER-BIONTECH))	37	9	6	3
BCG (NO BRAND NAME)	38													COVID19 (COVID19 (JANSSEN))	38													COVID19 (COVID19 (MODERNA))	38	2		2						2		2		COVID19 (COVID19 (PFIZER-BIONTECH))	38	6	2	3
BCG (NO BRAND NAME)	39													COVID19 (COVID19 (JANSSEN))	39													COVID19 (COVID19 (MODERNA))	39	2	1	1						2	1	1		COVID19 (COVID19 (PFIZER-BIONTECH))	39	2		2
BCG (NO BRAND NAME)	40													COVID19 (COVID19 (JANSSEN))	40													COVID19 (COVID19 (MODERNA))	40	1								1				COVID19 (COVID19 (PFIZER-BIONTECH))	40	3		1
BCG (NO BRAND NAME)	41													COVID19 (COVID19 (JANSSEN))	41													COVID19 (COVID19 (MODERNA))	41	3	1	2						3	1	2		COVID19 (COVID19 (PFIZER-BIONTECH))	41	4	3	1
BCG (NO BRAND NAME)	42													COVID19 (COVID19 (JANSSEN))	42													COVID19 (COVID19 (MODERNA))	42	2	1	1						2	1	1		COVID19 (COVID19 (PFIZER-BIONTECH))	42	3		3
BCG (NO BRAND NAME)	43													COVID19 (COVID19 (JANSSEN))	43													COVID19 (COVID19 (MODERNA))	43													COVID19 (COVID19 (PFIZER-BIONTECH))	43	6	4	2
BCG (NO BRAND NAME)	44													COVID19 (COVID19 (JANSSEN))	44													COVID19 (COVID19 (MODERNA))	44	4	2	2						4	2	2		COVID19 (COVID19 (PFIZER-BIONTECH))	44
BCG (NO BRAND NAME)	45													COVID19 (COVID19 (JANSSEN))	45													COVID19 (COVID19 (MODERNA))	45	3	2	1						3	2	1		COVID19 (COVID19 (PFIZER-BIONTECH))	45	3		3
BCG (NO BRAND NAME)	46													COVID19 (COVID19 (JANSSEN))	46													COVID19 (COVID19 (MODERNA))	46	4	3	1						4	3	1		COVID19 (COVID19 (PFIZER-BIONTECH))	46	2	1	1
BCG (NO BRAND NAME)	47													COVID19 (COVID19 (JANSSEN))	47	1	1							1	1			COVID19 (COVID19 (MODERNA))	47													COVID19 (COVID19 (PFIZER-BIONTECH))	47	3	1	2
BCG (NO BRAND NAME)	48													COVID19 (COVID19 (JANSSEN))	48													COVID19 (COVID19 (MODERNA))	48	1		1						1		1		COVID19 (COVID19 (PFIZER-BIONTECH))	48	2	1	1
BCG (NO BRAND NAME)	49													COVID19 (COVID19 (JANSSEN))	49													COVID19 (COVID19 (MODERNA))	49													COVID19 (COVID19 (PFIZER-BIONTECH))	49	1		1
BCG (NO BRAND NAME)	50													COVID19 (COVID19 (JANSSEN))	50													COVID19 (COVID19 (MODERNA))	50													COVID19 (COVID19 (PFIZER-BIONTECH))	50	2	1
BCG (NO BRAND NAME)	51													COVID19 (COVID19 (JANSSEN))	51													COVID19 (COVID19 (MODERNA))	51	3		3						3		3		COVID19 (COVID19 (PFIZER-BIONTECH))	51	1	1
BCG (NO BRAND NAME)	52													COVID19 (COVID19 (JANSSEN))	52													COVID19 (COVID19 (MODERNA))	52													COVID19 (COVID19 (PFIZER-BIONTECH))	52	1		1
BCG (NO BRAND NAME)	53													COVID19 (COVID19 (JANSSEN))	53													COVID19 (COVID19 (MODERNA))	53	2	1	1						2	1	1		COVID19 (COVID19 (PFIZER-BIONTECH))	53	3	1	2
BCG (NO BRAND NAME)	54													COVID19 (COVID19 (JANSSEN))	54													COVID19 (COVID19 (MODERNA))	54													COVID19 (COVID19 (PFIZER-BIONTECH))	54
BCG (NO BRAND NAME)	55													COVID19 (COVID19 (JANSSEN))	55													COVID19 (COVID19 (MODERNA))	55	1	1							1	1			COVID19 (COVID19 (PFIZER-BIONTECH))	55
BCG (NO BRAND NAME)	56													COVID19 (COVID19 (JANSSEN))	56													COVID19 (COVID19 (MODERNA))	56	1								1				COVID19 (COVID19 (PFIZER-BIONTECH))	56	1		1
BCG (NO BRAND NAME)	57													COVID19 (COVID19 (JANSSEN))	57													COVID19 (COVID19 (MODERNA))	57	2	1	1						2	1	1		COVID19 (COVID19 (PFIZER-BIONTECH))	57
BCG (NO BRAND NAME)	58													COVID19 (COVID19 (JANSSEN))	58													COVID19 (COVID19 (MODERNA))	58													COVID19 (COVID19 (PFIZER-BIONTECH))	58	1	1
BCG (NO BRAND NAME)	59													COVID19 (COVID19 (JANSSEN))	59													COVID19 (COVID19 (MODERNA))	59	4	1	2						4	1	2		COVID19 (COVID19 (PFIZER-BIONTECH))	59	3	1	2
BCG (NO BRAND NAME)	60													COVID19 (COVID19 (JANSSEN))	60													COVID19 (COVID19 (MODERNA))	60	3	1	1						3	1	1		COVID19 (COVID19 (PFIZER-BIONTECH))	60	2	1	1
BCG (NO BRAND NAME)	61													COVID19 (COVID19 (JANSSEN))	61	1	1							1	1			COVID19 (COVID19 (MODERNA))	61	5	2	1						5	2	1		COVID19 (COVID19 (PFIZER-BIONTECH))	61	2		1
BCG (NO BRAND NAME)	62													COVID19 (COVID19 (JANSSEN))	62													COVID19 (COVID19 (MODERNA))	62	2	1	1						2	1	1		COVID19 (COVID19 (PFIZER-BIONTECH))	62	2		2
BCG (NO BRAND NAME)	63													COVID19 (COVID19 (JANSSEN))	63													COVID19 (COVID19 (MODERNA))	63													COVID19 (COVID19 (PFIZER-BIONTECH))	63	1		1
BCG (NO BRAND NAME)	64													COVID19 (COVID19 (JANSSEN))	64													COVID19 (COVID19 (MODERNA))	64													COVID19 (COVID19 (PFIZER-BIONTECH))	64
BCG (NO BRAND NAME)	65													COVID19 (COVID19 (JANSSEN))	65													COVID19 (COVID19 (MODERNA))	65	2	1	1						2	1	1		COVID19 (COVID19 (PFIZER-BIONTECH))	65	1		1
BCG (NO BRAND NAME)	66													COVID19 (COVID19 (JANSSEN))	66													COVID19 (COVID19 (MODERNA))	66													COVID19 (COVID19 (PFIZER-BIONTECH))	66	1	1
BCG (NO BRAND NAME)	67													COVID19 (COVID19 (JANSSEN))	67													COVID19 (COVID19 (MODERNA))	67	2	1	1						2	1	1		COVID19 (COVID19 (PFIZER-BIONTECH))	67
BCG (NO BRAND NAME)	68													COVID19 (COVID19 (JANSSEN))	68													COVID19 (COVID19 (MODERNA))	68													COVID19 (COVID19 (PFIZER-BIONTECH))	68	1	1
BCG (NO BRAND NAME)	69													COVID19 (COVID19 (JANSSEN))	69													COVID19 (COVID19 (MODERNA))	69	1	1							1	1			COVID19 (COVID19 (PFIZER-BIONTECH))	69	1		1
BCG (NO BRAND NAME)	70													COVID19 (COVID19 (JANSSEN))	70													COVID19 (COVID19 (MODERNA))	70													COVID19 (COVID19 (PFIZER-BIONTECH))	70	2	1	1
BCG (NO BRAND NAME)	71													COVID19 (COVID19 (JANSSEN))	71													COVID19 (COVID19 (MODERNA))	71	1		1						1		1		COVID19 (COVID19 (PFIZER-BIONTECH))	71
BCG (NO BRAND NAME)	72													COVID19 (COVID19 (JANSSEN))	72													COVID19 (COVID19 (MODERNA))	72													COVID19 (COVID19 (PFIZER-BIONTECH))	72
BCG (NO BRAND NAME)	73													COVID19 (COVID19 (JANSSEN))	73													COVID19 (COVID19 (MODERNA))	73	4	2	2						4	2	2		COVID19 (COVID19 (PFIZER-BIONTECH))	73
BCG (NO BRAND NAME)	74													COVID19 (COVID19 (JANSSEN))	74													COVID19 (COVID19 (MODERNA))	74													COVID19 (COVID19 (PFIZER-BIONTECH))	74
BCG (NO BRAND NAME)	75													COVID19 (COVID19 (JANSSEN))	75													COVID19 (COVID19 (MODERNA))	75													COVID19 (COVID19 (PFIZER-BIONTECH))	75	1	1
BCG (NO BRAND NAME)	76													COVID19 (COVID19 (JANSSEN))	76													COVID19 (COVID19 (MODERNA))	76	2								2				COVID19 (COVID19 (PFIZER-BIONTECH))	76	1		1
BCG (NO BRAND NAME)	77													COVID19 (COVID19 (JANSSEN))	77													COVID19 (COVID19 (MODERNA))	77	1		1						1		1		COVID19 (COVID19 (PFIZER-BIONTECH))	77	1	1
BCG (NO BRAND NAME)	78													COVID19 (COVID19 (JANSSEN))	78													COVID19 (COVID19 (MODERNA))	78													COVID19 (COVID19 (PFIZER-BIONTECH))	78	5	2	3
BCG (NO BRAND NAME)	79													COVID19 (COVID19 (JANSSEN))	79													COVID19 (COVID19 (MODERNA))	79													COVID19 (COVID19 (PFIZER-BIONTECH))	79	1		1
BCG (NO BRAND NAME)	80													COVID19 (COVID19 (JANSSEN))	80													COVID19 (COVID19 (MODERNA))	80													COVID19 (COVID19 (PFIZER-BIONTECH))	80
BCG (NO BRAND NAME)	81													COVID19 (COVID19 (JANSSEN))	81													COVID19 (COVID19 (MODERNA))	81													COVID19 (COVID19 (PFIZER-BIONTECH))	81	1	1
BCG (NO BRAND NAME)	82													COVID19 (COVID19 (JANSSEN))	82													COVID19 (COVID19 (MODERNA))	82													COVID19 (COVID19 (PFIZER-BIONTECH))	82	1
BCG (NO BRAND NAME)	83													COVID19 (COVID19 (JANSSEN))	83													COVID19 (COVID19 (MODERNA))	83	1		1						1		1		COVID19 (COVID19 (PFIZER-BIONTECH))	83
BCG (NO BRAND NAME)	84													COVID19 (COVID19 (JANSSEN))	84													COVID19 (COVID19 (MODERNA))	84													COVID19 (COVID19 (PFIZER-BIONTECH))	84	3	1	2
BCG (NO BRAND NAME)	85													COVID19 (COVID19 (JANSSEN))	85													COVID19 (COVID19 (MODERNA))	85													COVID19 (COVID19 (PFIZER-BIONTECH))	85
BCG (NO BRAND NAME)	86													COVID19 (COVID19 (JANSSEN))	86													COVID19 (COVID19 (MODERNA))	86													COVID19 (COVID19 (PFIZER-BIONTECH))	86
BCG (NO BRAND NAME)	87													COVID19 (COVID19 (JANSSEN))	87													COVID19 (COVID19 (MODERNA))	87													COVID19 (COVID19 (PFIZER-BIONTECH))	87
BCG (NO BRAND NAME)	88													COVID19 (COVID19 (JANSSEN))	88	1	1							1	1			COVID19 (COVID19 (MODERNA))	88	2	1	1						2	1	1		COVID19 (COVID19 (PFIZER-BIONTECH))	88
BCG (NO BRAND NAME)	89													COVID19 (COVID19 (JANSSEN))	89													COVID19 (COVID19 (MODERNA))	89													COVID19 (COVID19 (PFIZER-BIONTECH))	89
BCG (NO BRAND NAME)	90													COVID19 (COVID19 (JANSSEN))	90													COVID19 (COVID19 (MODERNA))	90	2	1	1						2	1	1		COVID19 (COVID19 (PFIZER-BIONTECH))	90
BCG (NO BRAND NAME)	91													COVID19 (COVID19 (JANSSEN))	91													COVID19 (COVID19 (MODERNA))	91													COVID19 (COVID19 (PFIZER-BIONTECH))	91
BCG (NO BRAND NAME)	92													COVID19 (COVID19 (JANSSEN))	92													COVID19 (COVID19 (MODERNA))	92													COVID19 (COVID19 (PFIZER-BIONTECH))	92	2		1
BCG (NO BRAND NAME)	93													COVID19 (COVID19 (JANSSEN))	93													COVID19 (COVID19 (MODERNA))	93													COVID19 (COVID19 (PFIZER-BIONTECH))	93
BCG (NO BRAND NAME)	94													COVID19 (COVID19 (JANSSEN))	94													COVID19 (COVID19 (MODERNA))	94													COVID19 (COVID19 (PFIZER-BIONTECH))	94
BCG (NO BRAND NAME)	95													COVID19 (COVID19 (JANSSEN))	95													COVID19 (COVID19 (MODERNA))	95													COVID19 (COVID19 (PFIZER-BIONTECH))	95
BCG (NO BRAND NAME)	96													COVID19 (COVID19 (JANSSEN))	96													COVID19 (COVID19 (MODERNA))	96													COVID19 (COVID19 (PFIZER-BIONTECH))	96	1		1
BCG (NO BRAND NAME)	97													COVID19 (COVID19 (JANSSEN))	97													COVID19 (COVID19 (MODERNA))	97													COVID19 (COVID19 (PFIZER-BIONTECH))	97	1		1
BCG (NO BRAND NAME)	98													COVID19 (COVID19 (JANSSEN))	98													COVID19 (COVID19 (MODERNA))	98													COVID19 (COVID19 (PFIZER-BIONTECH))	98
BCG (NO BRAND NAME)	99													COVID19 (COVID19 (JANSSEN))	99													COVID19 (COVID19 (MODERNA))	99													COVID19 (COVID19 (PFIZER-BIONTECH))	99
BCG (NO BRAND NAME)	100													COVID19 (COVID19 (JANSSEN))	100													COVID19 (COVID19 (MODERNA))	100													COVID19 (COVID19 (PFIZER-BIONTECH))	100
BCG (NO BRAND NAME)	101													COVID19 (COVID19 (JANSSEN))	101													COVID19 (COVID19 (MODERNA))	101													COVID19 (COVID19 (PFIZER-BIONTECH))	101	2	1	1
BCG (NO BRAND NAME)	102													COVID19 (COVID19 (JANSSEN))	102													COVID19 (COVID19 (MODERNA))	102													COVID19 (COVID19 (PFIZER-BIONTECH))	102
BCG (NO BRAND NAME)	103													COVID19 (COVID19 (JANSSEN))	103													COVID19 (COVID19 (MODERNA))	103													COVID19 (COVID19 (PFIZER-BIONTECH))	103
BCG (NO BRAND NAME)	104													COVID19 (COVID19 (JANSSEN))	104													COVID19 (COVID19 (MODERNA))	104	2	1	1						2	1	1		COVID19 (COVID19 (PFIZER-BIONTECH))	104
BCG (NO BRAND NAME)	105													COVID19 (COVID19 (JANSSEN))	105													COVID19 (COVID19 (MODERNA))	105													COVID19 (COVID19 (PFIZER-BIONTECH))	105
BCG (NO BRAND NAME)	106													COVID19 (COVID19 (JANSSEN))	106													COVID19 (COVID19 (MODERNA))	106													COVID19 (COVID19 (PFIZER-BIONTECH))	106
BCG (NO BRAND NAME)	107													COVID19 (COVID19 (JANSSEN))	107													COVID19 (COVID19 (MODERNA))	107													COVID19 (COVID19 (PFIZER-BIONTECH))	107
BCG (NO BRAND NAME)	108													COVID19 (COVID19 (JANSSEN))	108													COVID19 (COVID19 (MODERNA))	108	1		1						1		1		COVID19 (COVID19 (PFIZER-BIONTECH))	108
BCG (NO BRAND NAME)	109													COVID19 (COVID19 (JANSSEN))	109													COVID19 (COVID19 (MODERNA))	109													COVID19 (COVID19 (PFIZER-BIONTECH))	109
BCG (NO BRAND NAME)	110													COVID19 (COVID19 (JANSSEN))	110													COVID19 (COVID19 (MODERNA))	110													COVID19 (COVID19 (PFIZER-BIONTECH))	110
BCG (NO BRAND NAME)	111													COVID19 (COVID19 (JANSSEN))	111													COVID19 (COVID19 (MODERNA))	111													COVID19 (COVID19 (PFIZER-BIONTECH))	111
BCG (NO BRAND NAME)	112													COVID19 (COVID19 (JANSSEN))	112													COVID19 (COVID19 (MODERNA))	112													COVID19 (COVID19 (PFIZER-BIONTECH))	112
BCG (NO BRAND NAME)	113													COVID19 (COVID19 (JANSSEN))	113													COVID19 (COVID19 (MODERNA))	113													COVID19 (COVID19 (PFIZER-BIONTECH))	113
BCG (NO BRAND NAME)	114													COVID19 (COVID19 (JANSSEN))	114													COVID19 (COVID19 (MODERNA))	114													COVID19 (COVID19 (PFIZER-BIONTECH))	114
BCG (NO BRAND NAME)	115													COVID19 (COVID19 (JANSSEN))	115													COVID19 (COVID19 (MODERNA))	115													COVID19 (COVID19 (PFIZER-BIONTECH))	115
BCG (NO BRAND NAME)	116													COVID19 (COVID19 (JANSSEN))	116													COVID19 (COVID19 (MODERNA))	116													COVID19 (COVID19 (PFIZER-BIONTECH))	116
BCG (NO BRAND NAME)	117													COVID19 (COVID19 (JANSSEN))	117													COVID19 (COVID19 (MODERNA))	117													COVID19 (COVID19 (PFIZER-BIONTECH))	117
BCG (NO BRAND NAME)	118													COVID19 (COVID19 (JANSSEN))	118													COVID19 (COVID19 (MODERNA))	118													COVID19 (COVID19 (PFIZER-BIONTECH))	118
BCG (NO BRAND NAME)	119													COVID19 (COVID19 (JANSSEN))	119													COVID19 (COVID19 (MODERNA))	119													COVID19 (COVID19 (PFIZER-BIONTECH))	119
BCG (NO BRAND NAME)	120													COVID19 (COVID19 (JANSSEN))	120													COVID19 (COVID19 (MODERNA))	120													COVID19 (COVID19 (PFIZER-BIONTECH))	120	1		1
[truncated: 62 more columns]

## Sheet: All_menstration_delayed
Dose report
Vaccine	All	1	2	3	4	5	6	7+	UNK	N/A
COVID19 (COVID19 (PFIZER-BIONTECH))	2467	1365	903	11					188
COVID19 (COVID19 (MODERNA))	552	305	176	3					68
HPV (GARDASIL)	106	41	28	8					29
COVID19 (COVID19 (JANSSEN))	91	52							35	4
HPV (GARDASIL 9)	10	3	3	1	1				2
VACCINE NOT SPECIFIED (NO BRAND NAME)	7	1	4						2
HPV (NO BRAND NAME)	6	2	1						3
COVID19 (COVID19 (UNKNOWN))	5	4		1
VARICELLA (VARIVAX)	4	2	1						1
INFLUENZA (SEASONAL) (FLUCELVAX QUADRIVALENT)	4								4
HPV (CERVARIX)	4	2		1					1
HEP A (HAVRIX)	3		2	1
MEASLES + MUMPS + RUBELLA (MMR II)	2	1							1
TDAP (BOOSTRIX)	2	1							1
MENINGOCOCCAL B (BEXSERO)	2	2
MENINGOCOCCAL CONJUGATE (MENVEO)	2	1	1
INFLUENZA (SEASONAL) (FLUZONE)	1								1
HEP A (NO BRAND NAME)	1	1
INFLUENZA (SEASONAL) (NO BRAND NAME)	1								1
TYPHOID LIVE ORAL TY21A (VIVOTIF)	1	1
HEP A (VAQTA)	1	1
MEASLES + MUMPS + RUBELLA (NO BRAND NAME)	1								1
TDAP (ADACEL)	1	1
MENINGOCOCCAL CONJUGATE (MENACTRA)	1		1
DT ADSORBED (NO BRAND NAME)	1								1
POLIO VIRUS, INACT. (IPOL)	1								1
HEP A + HEP B (TWINRIX)	1								1
HEP A + TYP (HEPATYRIX)	1	1
DTAP + IPV + HIB (INFANRIX QUINTA)	1								1
DTAP (NO BRAND NAME)	1								1
Total	3281
COVID-19	3115
COVID-19 %	0.949406
Age report
COVID19 (COVID19 (JANSSEN))	Age	All	1	2	3	All Male	1 Male	2 Male	3 Male	All Female	1 Female	2 Female	3 Female	COVID19 (COVID19 (MODERNA))	Age	All	1	2	3	All Male	1 Male	2 Male	3 Male	All Female	1 Female	2 Female	3 Female	COVID19 (COVID19 (PFIZER-BIONTECH))	Age	All	1	2	3	All Male	1 Male	2 Male	3 Male	All Female	1 Female	2 Female	3 Female	COVID19 (COVID19 (UNKNOWN))	Age	All	1	2	3	All Male	1 Male
COVID19 (COVID19 (JANSSEN))	0	12								12				COVID19 (COVID19 (MODERNA))	0	42	30	8	1					38	29	5	1	COVID19 (COVID19 (PFIZER-BIONTECH))	0	1497	948	472	4	1		1		1456	922	460	4	COVID19 (COVID19 (UNKNOWN))	0	1			1
COVID19 (COVID19 (JANSSEN))	1													COVID19 (COVID19 (MODERNA))	1													COVID19 (COVID19 (PFIZER-BIONTECH))	1													COVID19 (COVID19 (UNKNOWN))	1
COVID19 (COVID19 (JANSSEN))	2													COVID19 (COVID19 (MODERNA))	2													COVID19 (COVID19 (PFIZER-BIONTECH))	2													COVID19 (COVID19 (UNKNOWN))	2
COVID19 (COVID19 (JANSSEN))	3													COVID19 (COVID19 (MODERNA))	3													COVID19 (COVID19 (PFIZER-BIONTECH))	3													COVID19 (COVID19 (UNKNOWN))	3
COVID19 (COVID19 (JANSSEN))	4													COVID19 (COVID19 (MODERNA))	4													COVID19 (COVID19 (PFIZER-BIONTECH))	4													COVID19 (COVID19 (UNKNOWN))	4
COVID19 (COVID19 (JANSSEN))	5													COVID19 (COVID19 (MODERNA))	5													COVID19 (COVID19 (PFIZER-BIONTECH))	5													COVID19 (COVID19 (UNKNOWN))	5
COVID19 (COVID19 (JANSSEN))	6													COVID19 (COVID19 (MODERNA))	6													COVID19 (COVID19 (PFIZER-BIONTECH))	6													COVID19 (COVID19 (UNKNOWN))	6
COVID19 (COVID19 (JANSSEN))	7													COVID19 (COVID19 (MODERNA))	7													COVID19 (COVID19 (PFIZER-BIONTECH))	7													COVID19 (COVID19 (UNKNOWN))	7
COVID19 (COVID19 (JANSSEN))	8													COVID19 (COVID19 (MODERNA))	8													COVID19 (COVID19 (PFIZER-BIONTECH))	8													COVID19 (COVID19 (UNKNOWN))	8
COVID19 (COVID19 (JANSSEN))	9													COVID19 (COVID19 (MODERNA))	9													COVID19 (COVID19 (PFIZER-BIONTECH))	9													COVID19 (COVID19 (UNKNOWN))	9
COVID19 (COVID19 (JANSSEN))	10													COVID19 (COVID19 (MODERNA))	10													COVID19 (COVID19 (PFIZER-BIONTECH))	10													COVID19 (COVID19 (UNKNOWN))	10
COVID19 (COVID19 (JANSSEN))	11													COVID19 (COVID19 (MODERNA))	11													COVID19 (COVID19 (PFIZER-BIONTECH))	11													COVID19 (COVID19 (UNKNOWN))	11
COVID19 (COVID19 (JANSSEN))	12													COVID19 (COVID19 (MODERNA))	12													COVID19 (COVID19 (PFIZER-BIONTECH))	12	4	2	1						4	2	1		COVID19 (COVID19 (UNKNOWN))	12
COVID19 (COVID19 (JANSSEN))	13													COVID19 (COVID19 (MODERNA))	13													COVID19 (COVID19 (PFIZER-BIONTECH))	13	6	3	1						6	3	1		COVID19 (COVID19 (UNKNOWN))	13
COVID19 (COVID19 (JANSSEN))	14													COVID19 (COVID19 (MODERNA))	14													COVID19 (COVID19 (PFIZER-BIONTECH))	14	8	4	4						8	4	4		COVID19 (COVID19 (UNKNOWN))	14
COVID19 (COVID19 (JANSSEN))	15													COVID19 (COVID19 (MODERNA))	15													COVID19 (COVID19 (PFIZER-BIONTECH))	15	1								1				COVID19 (COVID19 (UNKNOWN))	15
COVID19 (COVID19 (JANSSEN))	16													COVID19 (COVID19 (MODERNA))	16													COVID19 (COVID19 (PFIZER-BIONTECH))	16	5	3	2						5	3	2		COVID19 (COVID19 (UNKNOWN))	16
COVID19 (COVID19 (JANSSEN))	17													COVID19 (COVID19 (MODERNA))	17													COVID19 (COVID19 (PFIZER-BIONTECH))	17	2	1							2	1			COVID19 (COVID19 (UNKNOWN))	17
COVID19 (COVID19 (JANSSEN))	18													COVID19 (COVID19 (MODERNA))	18	2	1	1						2	1	1		COVID19 (COVID19 (PFIZER-BIONTECH))	18	11	3	5						11	3	5		COVID19 (COVID19 (UNKNOWN))	18
COVID19 (COVID19 (JANSSEN))	19	2								2				COVID19 (COVID19 (MODERNA))	19	7	3	3						7	3	3		COVID19 (COVID19 (PFIZER-BIONTECH))	19	8	4	1						8	4	1		COVID19 (COVID19 (UNKNOWN))	19
COVID19 (COVID19 (JANSSEN))	20	2	1							2	1			COVID19 (COVID19 (MODERNA))	20	4	2	2						4	2	2		COVID19 (COVID19 (PFIZER-BIONTECH))	20	15	6	8						15	6	8		COVID19 (COVID19 (UNKNOWN))	20
COVID19 (COVID19 (JANSSEN))	21	1								1				COVID19 (COVID19 (MODERNA))	21	6	5	1						6	5	1		COVID19 (COVID19 (PFIZER-BIONTECH))	21	18	8	8						18	8	8		COVID19 (COVID19 (UNKNOWN))	21
COVID19 (COVID19 (JANSSEN))	22													COVID19 (COVID19 (MODERNA))	22	7	4	3						7	4	3		COVID19 (COVID19 (PFIZER-BIONTECH))	22	13	4	8						13	4	8		COVID19 (COVID19 (UNKNOWN))	22
COVID19 (COVID19 (JANSSEN))	23	2	1							2	1			COVID19 (COVID19 (MODERNA))	23	8	8							8	8			COVID19 (COVID19 (PFIZER-BIONTECH))	23	24	12	10						24	12	10		COVID19 (COVID19 (UNKNOWN))	23
COVID19 (COVID19 (JANSSEN))	24													COVID19 (COVID19 (MODERNA))	24	18	10	6	1					18	10	6	1	COVID19 (COVID19 (PFIZER-BIONTECH))	24	26	14	11						26	14	11		COVID19 (COVID19 (UNKNOWN))	24
COVID19 (COVID19 (JANSSEN))	25	1	1							1	1			COVID19 (COVID19 (MODERNA))	25	16	7	7						16	7	7		COVID19 (COVID19 (PFIZER-BIONTECH))	25	41	15	20						40	15	20		COVID19 (COVID19 (UNKNOWN))	25
COVID19 (COVID19 (JANSSEN))	26													COVID19 (COVID19 (MODERNA))	26	19	9	7						19	9	7		COVID19 (COVID19 (PFIZER-BIONTECH))	26	32	14	14						32	14	14		COVID19 (COVID19 (UNKNOWN))	26
COVID19 (COVID19 (JANSSEN))	27	5	4							5	4			COVID19 (COVID19 (MODERNA))	27	19	11	6						19	11	6		COVID19 (COVID19 (PFIZER-BIONTECH))	27	26	16	7						26	16	7		COVID19 (COVID19 (UNKNOWN))	27
COVID19 (COVID19 (JANSSEN))	28	1	1							1	1			COVID19 (COVID19 (MODERNA))	28	19	13	3						19	13	3		COVID19 (COVID19 (PFIZER-BIONTECH))	28	23	12	9	1					23	12	9	1	COVID19 (COVID19 (UNKNOWN))	28
COVID19 (COVID19 (JANSSEN))	29	5	5							5	5			COVID19 (COVID19 (MODERNA))	29	32	15	12						32	15	12		COVID19 (COVID19 (PFIZER-BIONTECH))	29	37	20	13	1					37	20	13	1	COVID19 (COVID19 (UNKNOWN))	29
COVID19 (COVID19 (JANSSEN))	30	2								2				COVID19 (COVID19 (MODERNA))	30	28	22	5						28	22	5		COVID19 (COVID19 (PFIZER-BIONTECH))	30	39	16	18						39	16	18		COVID19 (COVID19 (UNKNOWN))	30
COVID19 (COVID19 (JANSSEN))	31	2	1							2	1			COVID19 (COVID19 (MODERNA))	31	28	15	8						28	15	8		COVID19 (COVID19 (PFIZER-BIONTECH))	31	44	20	20	1					44	20	20	1	COVID19 (COVID19 (UNKNOWN))	31
COVID19 (COVID19 (JANSSEN))	32	4	3							4	3			COVID19 (COVID19 (MODERNA))	32	33	17	12						32	16	12		COVID19 (COVID19 (PFIZER-BIONTECH))	32	48	23	20						47	23	20		COVID19 (COVID19 (UNKNOWN))	32
COVID19 (COVID19 (JANSSEN))	33	4	4							4	4			COVID19 (COVID19 (MODERNA))	33	26	18	4						26	18	4		COVID19 (COVID19 (PFIZER-BIONTECH))	33	34	14	16						34	14	16		COVID19 (COVID19 (UNKNOWN))	33
COVID19 (COVID19 (JANSSEN))	34													COVID19 (COVID19 (MODERNA))	34	21	11	6						21	11	6		COVID19 (COVID19 (PFIZER-BIONTECH))	34	40	20	14	1					40	20	14	1	COVID19 (COVID19 (UNKNOWN))	34
COVID19 (COVID19 (JANSSEN))	35	1								1				COVID19 (COVID19 (MODERNA))	35	24	9	11						24	9	11		COVID19 (COVID19 (PFIZER-BIONTECH))	35	45	20	23						45	20	23		COVID19 (COVID19 (UNKNOWN))	35
COVID19 (COVID19 (JANSSEN))	36	6	3							6	3			COVID19 (COVID19 (MODERNA))	36	17	10	4						17	10	4		COVID19 (COVID19 (PFIZER-BIONTECH))	36	35	16	13	1					35	16	13	1	COVID19 (COVID19 (UNKNOWN))	36
COVID19 (COVID19 (JANSSEN))	37	4	2							4	2			COVID19 (COVID19 (MODERNA))	37	19	9	8						19	9	8		COVID19 (COVID19 (PFIZER-BIONTECH))	37	45	19	21						45	19	21		COVID19 (COVID19 (UNKNOWN))	37	1	1
COVID19 (COVID19 (JANSSEN))	38	4	3							4	3			COVID19 (COVID19 (MODERNA))	38	14	6	7						14	6	7		COVID19 (COVID19 (PFIZER-BIONTECH))	38	32	15	12	1					32	15	12	1	COVID19 (COVID19 (UNKNOWN))	38
COVID19 (COVID19 (JANSSEN))	39	3	2							3	2			COVID19 (COVID19 (MODERNA))	39	13	9	4		1	1			12	8	4		COVID19 (COVID19 (PFIZER-BIONTECH))	39	37	15	19						37	15	19		COVID19 (COVID19 (UNKNOWN))	39
COVID19 (COVID19 (JANSSEN))	40	5	2							5	2			COVID19 (COVID19 (MODERNA))	40	13	5	5	1					13	5	5	1	COVID19 (COVID19 (PFIZER-BIONTECH))	40	36	14	19						36	14	19		COVID19 (COVID19 (UNKNOWN))	40
COVID19 (COVID19 (JANSSEN))	41	4	4							4	4			COVID19 (COVID19 (MODERNA))	41	12	9	2						12	9	2		COVID19 (COVID19 (PFIZER-BIONTECH))	41	24	7	14						24	7	14		COVID19 (COVID19 (UNKNOWN))	41
COVID19 (COVID19 (JANSSEN))	42	3				1				2				COVID19 (COVID19 (MODERNA))	42	13	4	6						13	4	6		COVID19 (COVID19 (PFIZER-BIONTECH))	42	23	8	10						23	8	10		COVID19 (COVID19 (UNKNOWN))	42
COVID19 (COVID19 (JANSSEN))	43	1	1							1	1			COVID19 (COVID19 (MODERNA))	43	10	6	4						10	6	4		COVID19 (COVID19 (PFIZER-BIONTECH))	43	37	12	21						37	12	21		COVID19 (COVID19 (UNKNOWN))	43	1	1
COVID19 (COVID19 (JANSSEN))	44	3	3							3	3			COVID19 (COVID19 (MODERNA))	44	13	4	6						13	4	6		COVID19 (COVID19 (PFIZER-BIONTECH))	44	27	10	10	1					27	10	10	1	COVID19 (COVID19 (UNKNOWN))	44
COVID19 (COVID19 (JANSSEN))	45	4	3							4	3			COVID19 (COVID19 (MODERNA))	45	15	8	4						15	8	4		COVID19 (COVID19 (PFIZER-BIONTECH))	45	21	9	10						21	9	10		COVID19 (COVID19 (UNKNOWN))	45
COVID19 (COVID19 (JANSSEN))	46	2	1							2	1			COVID19 (COVID19 (MODERNA))	46	9	4	3						9	4	3		COVID19 (COVID19 (PFIZER-BIONTECH))	46	22	9	11						22	9	11		COVID19 (COVID19 (UNKNOWN))	46
COVID19 (COVID19 (JANSSEN))	47	2	2							2	2			COVID19 (COVID19 (MODERNA))	47	7	3	3						7	3	3		COVID19 (COVID19 (PFIZER-BIONTECH))	47	20	6	10						20	6	10		COVID19 (COVID19 (UNKNOWN))	47
COVID19 (COVID19 (JANSSEN))	48	2	1							2	1			COVID19 (COVID19 (MODERNA))	48	11	6	2						10	5	2		COVID19 (COVID19 (PFIZER-BIONTECH))	48	20	11	8						20	11	8		COVID19 (COVID19 (UNKNOWN))	48
COVID19 (COVID19 (JANSSEN))	49	1	1							1	1			COVID19 (COVID19 (MODERNA))	49	10	7	3						10	7	3		COVID19 (COVID19 (PFIZER-BIONTECH))	49	17	5	7						17	5	7		COVID19 (COVID19 (UNKNOWN))	49	1	1
COVID19 (COVID19 (JANSSEN))	50	1	1							1	1			COVID19 (COVID19 (MODERNA))	50	5	2	2						5	2	2		COVID19 (COVID19 (PFIZER-BIONTECH))	50	10	4	5						10	4	5		COVID19 (COVID19 (UNKNOWN))	50	1	1
COVID19 (COVID19 (JANSSEN))	51													COVID19 (COVID19 (MODERNA))	51	5	2	3						5	2	3		COVID19 (COVID19 (PFIZER-BIONTECH))	51	9	3	3						9	3	3		COVID19 (COVID19 (UNKNOWN))	51
COVID19 (COVID19 (JANSSEN))	52	2	2							2	2			COVID19 (COVID19 (MODERNA))	52	4		4						4		4		COVID19 (COVID19 (PFIZER-BIONTECH))	52	1		1						1		1		COVID19 (COVID19 (UNKNOWN))	52
COVID19 (COVID19 (JANSSEN))	53													COVID19 (COVID19 (MODERNA))	53	1								1				COVID19 (COVID19 (PFIZER-BIONTECH))	53	4		4						4		4		COVID19 (COVID19 (UNKNOWN))	53
COVID19 (COVID19 (JANSSEN))	54													COVID19 (COVID19 (MODERNA))	54	2	1	1						2	1	1		COVID19 (COVID19 (PFIZER-BIONTECH))	54													COVID19 (COVID19 (UNKNOWN))	54
COVID19 (COVID19 (JANSSEN))	55													COVID19 (COVID19 (MODERNA))	55													COVID19 (COVID19 (PFIZER-BIONTECH))	55													COVID19 (COVID19 (UNKNOWN))	55
COVID19 (COVID19 (JANSSEN))	56													COVID19 (COVID19 (MODERNA))	56													COVID19 (COVID19 (PFIZER-BIONTECH))	56													COVID19 (COVID19 (UNKNOWN))	56
COVID19 (COVID19 (JANSSEN))	57													COVID19 (COVID19 (MODERNA))	57													COVID19 (COVID19 (PFIZER-BIONTECH))	57													COVID19 (COVID19 (UNKNOWN))	57
COVID19 (COVID19 (JANSSEN))	58													COVID19 (COVID19 (MODERNA))	58													COVID19 (COVID19 (PFIZER-BIONTECH))	58													COVID19 (COVID19 (UNKNOWN))	58
COVID19 (COVID19 (JANSSEN))	59													COVID19 (COVID19 (MODERNA))	59													COVID19 (COVID19 (PFIZER-BIONTECH))	59													COVID19 (COVID19 (UNKNOWN))	59
COVID19 (COVID19 (JANSSEN))	60													COVID19 (COVID19 (MODERNA))	60													COVID19 (COVID19 (PFIZER-BIONTECH))	60													COVID19 (COVID19 (UNKNOWN))	60
COVID19 (COVID19 (JANSSEN))	61													COVID19 (COVID19 (MODERNA))	61													COVID19 (COVID19 (PFIZER-BIONTECH))	61													COVID19 (COVID19 (UNKNOWN))	61
COVID19 (COVID19 (JANSSEN))	62													COVID19 (COVID19 (MODERNA))	62													COVID19 (COVID19 (PFIZER-BIONTECH))	62													COVID19 (COVID19 (UNKNOWN))	62
COVID19 (COVID19 (JANSSEN))	63													COVID19 (COVID19 (MODERNA))	63													COVID19 (COVID19 (PFIZER-BIONTECH))	63													COVID19 (COVID19 (UNKNOWN))	63
COVID19 (COVID19 (JANSSEN))	64													COVID19 (COVID19 (MODERNA))	64													COVID19 (COVID19 (PFIZER-BIONTECH))	64													COVID19 (COVID19 (UNKNOWN))	64
COVID19 (COVID19 (JANSSEN))	65													COVID19 (COVID19 (MODERNA))	65													COVID19 (COVID19 (PFIZER-BIONTECH))	65													COVID19 (COVID19 (UNKNOWN))	65
COVID19 (COVID19 (JANSSEN))	66													COVID19 (COVID19 (MODERNA))	66													COVID19 (COVID19 (PFIZER-BIONTECH))	66													COVID19 (COVID19 (UNKNOWN))	66
COVID19 (COVID19 (JANSSEN))	67													COVID19 (COVID19 (MODERNA))	67													COVID19 (COVID19 (PFIZER-BIONTECH))	67													COVID19 (COVID19 (UNKNOWN))	67
COVID19 (COVID19 (JANSSEN))	68													COVID19 (COVID19 (MODERNA))	68													COVID19 (COVID19 (PFIZER-BIONTECH))	68													COVID19 (COVID19 (UNKNOWN))	68
COVID19 (COVID19 (JANSSEN))	69													COVID19 (COVID19 (MODERNA))	69													COVID19 (COVID19 (PFIZER-BIONTECH))	69													COVID19 (COVID19 (UNKNOWN))	69
COVID19 (COVID19 (JANSSEN))	70													COVID19 (COVID19 (MODERNA))	70													COVID19 (COVID19 (PFIZER-BIONTECH))	70													COVID19 (COVID19 (UNKNOWN))	70
COVID19 (COVID19 (JANSSEN))	71													COVID19 (COVID19 (MODERNA))	71													COVID19 (COVID19 (PFIZER-BIONTECH))	71													COVID19 (COVID19 (UNKNOWN))	71
COVID19 (COVID19 (JANSSEN))	72													COVID19 (COVID19 (MODERNA))	72													COVID19 (COVID19 (PFIZER-BIONTECH))	72													COVID19 (COVID19 (UNKNOWN))	72
COVID19 (COVID19 (JANSSEN))	73													COVID19 (COVID19 (MODERNA))	73													COVID19 (COVID19 (PFIZER-BIONTECH))	73													COVID19 (COVID19 (UNKNOWN))	73
COVID19 (COVID19 (JANSSEN))	74													COVID19 (COVID19 (MODERNA))	74													COVID19 (COVID19 (PFIZER-BIONTECH))	74													COVID19 (COVID19 (UNKNOWN))	74
COVID19 (COVID19 (JANSSEN))	75													COVID19 (COVID19 (MODERNA))	75													COVID19 (COVID19 (PFIZER-BIONTECH))	75													COVID19 (COVID19 (UNKNOWN))	75
COVID19 (COVID19 (JANSSEN))	76													COVID19 (COVID19 (MODERNA))	76													COVID19 (COVID19 (PFIZER-BIONTECH))	76													COVID19 (COVID19 (UNKNOWN))	76
COVID19 (COVID19 (JANSSEN))	77													COVID19 (COVID19 (MODERNA))	77													COVID19 (COVID19 (PFIZER-BIONTECH))	77													COVID19 (COVID19 (UNKNOWN))	77
COVID19 (COVID19 (JANSSEN))	78													COVID19 (COVID19 (MODERNA))	78													COVID19 (COVID19 (PFIZER-BIONTECH))	78													COVID19 (COVID19 (UNKNOWN))	78
COVID19 (COVID19 (JANSSEN))	79													COVID19 (COVID19 (MODERNA))	79													COVID19 (COVID19 (PFIZER-BIONTECH))	79													COVID19 (COVID19 (UNKNOWN))	79
COVID19 (COVID19 (JANSSEN))	80													COVID19 (COVID19 (MODERNA))	80													COVID19 (COVID19 (PFIZER-BIONTECH))	80													COVID19 (COVID19 (UNKNOWN))	80
COVID19 (COVID19 (JANSSEN))	81													COVID19 (COVID19 (MODERNA))	81													COVID19 (COVID19 (PFIZER-BIONTECH))	81													COVID19 (COVID19 (UNKNOWN))	81
COVID19 (COVID19 (JANSSEN))	82													COVID19 (COVID19 (MODERNA))	82													COVID19 (COVID19 (PFIZER-BIONTECH))	82													COVID19 (COVID19 (UNKNOWN))	82
COVID19 (COVID19 (JANSSEN))	83													COVID19 (COVID19 (MODERNA))	83													COVID19 (COVID19 (PFIZER-BIONTECH))	83													COVID19 (COVID19 (UNKNOWN))	83
COVID19 (COVID19 (JANSSEN))	84													COVID19 (COVID19 (MODERNA))	84													COVID19 (COVID19 (PFIZER-BIONTECH))	84													COVID19 (COVID19 (UNKNOWN))	84
COVID19 (COVID19 (JANSSEN))	85													COVID19 (COVID19 (MODERNA))	85													COVID19 (COVID19 (PFIZER-BIONTECH))	85													COVID19 (COVID19 (UNKNOWN))	85
COVID19 (COVID19 (JANSSEN))	86													COVID19 (COVID19 (MODERNA))	86													COVID19 (COVID19 (PFIZER-BIONTECH))	86													COVID19 (COVID19 (UNKNOWN))	86
COVID19 (COVID19 (JANSSEN))	87													COVID19 (COVID19 (MODERNA))	87													COVID19 (COVID19 (PFIZER-BIONTECH))	87													COVID19 (COVID19 (UNKNOWN))	87
COVID19 (COVID19 (JANSSEN))	88													COVID19 (COVID19 (MODERNA))	88													COVID19 (COVID19 (PFIZER-BIONTECH))	88													COVID19 (COVID19 (UNKNOWN))	88
COVID19 (COVID19 (JANSSEN))	89													COVID19 (COVID19 (MODERNA))	89													COVID19 (COVID19 (PFIZER-BIONTECH))	89													COVID19 (COVID19 (UNKNOWN))	89
COVID19 (COVID19 (JANSSEN))	90													COVID19 (COVID19 (MODERNA))	90													COVID19 (COVID19 (PFIZER-BIONTECH))	90													COVID19 (COVID19 (UNKNOWN))	90
COVID19 (COVID19 (JANSSEN))	91													COVID19 (COVID19 (MODERNA))	91													COVID19 (COVID19 (PFIZER-BIONTECH))	91													COVID19 (COVID19 (UNKNOWN))	91
COVID19 (COVID19 (JANSSEN))	92													COVID19 (COVID19 (MODERNA))	92													COVID19 (COVID19 (PFIZER-BIONTECH))	92													COVID19 (COVID19 (UNKNOWN))	92
COVID19 (COVID19 (JANSSEN))	93													COVID19 (COVID19 (MODERNA))	93													COVID19 (COVID19 (PFIZER-BIONTECH))	93													COVID19 (COVID19 (UNKNOWN))	93
COVID19 (COVID19 (JANSSEN))	94													COVID19 (COVID19 (MODERNA))	94													COVID19 (COVID19 (PFIZER-BIONTECH))	94													COVID19 (COVID19 (UNKNOWN))	94
COVID19 (COVID19 (JANSSEN))	95													COVID19 (COVID19 (MODERNA))	95													COVID19 (COVID19 (PFIZER-BIONTECH))	95													COVID19 (COVID19 (UNKNOWN))	95
COVID19 (COVID19 (JANSSEN))	96													COVID19 (COVID19 (MODERNA))	96													COVID19 (COVID19 (PFIZER-BIONTECH))	96													COVID19 (COVID19 (UNKNOWN))	96
COVID19 (COVID19 (JANSSEN))	97													COVID19 (COVID19 (MODERNA))	97													COVID19 (COVID19 (PFIZER-BIONTECH))	97													COVID19 (COVID19 (UNKNOWN))	97
COVID19 (COVID19 (JANSSEN))	98													COVID19 (COVID19 (MODERNA))	98													COVID19 (COVID19 (PFIZER-BIONTECH))	98													COVID19 (COVID19 (UNKNOWN))	98
COVID19 (COVID19 (JANSSEN))	99													COVID19 (COVID19 (MODERNA))	99													COVID19 (COVID19 (PFIZER-BIONTECH))	99													COVID19 (COVID19 (UNKNOWN))	99
COVID19 (COVID19 (JANSSEN))	100													COVID19 (COVID19 (MODERNA))	100													COVID19 (COVID19 (PFIZER-BIONTECH))	100													COVID19 (COVID19 (UNKNOWN))	100
COVID19 (COVID19 (JANSSEN))	101													COVID19 (COVID19 (MODERNA))	101													COVID19 (COVID19 (PFIZER-BIONTECH))	101													COVID19 (COVID19 (UNKNOWN))	101
COVID19 (COVID19 (JANSSEN))	102													COVID19 (COVID19 (MODERNA))	102													COVID19 (COVID19 (PFIZER-BIONTECH))	102													COVID19 (COVID19 (UNKNOWN))	102
COVID19 (COVID19 (JANSSEN))	103													COVID19 (COVID19 (MODERNA))	103													COVID19 (COVID19 (PFIZER-BIONTECH))	103													COVID19 (COVID19 (UNKNOWN))	103
COVID19 (COVID19 (JANSSEN))	104													COVID19 (COVID19 (MODERNA))	104													COVID19 (COVID19 (PFIZER-BIONTECH))	104													COVID19 (COVID19 (UNKNOWN))	104
COVID19 (COVID19 (JANSSEN))	105													COVID19 (COVID19 (MODERNA))	105													COVID19 (COVID19 (PFIZER-BIONTECH))	105													COVID19 (COVID19 (UNKNOWN))	105
COVID19 (COVID19 (JANSSEN))	106													COVID19 (COVID19 (MODERNA))	106													COVID19 (COVID19 (PFIZER-BIONTECH))	106													COVID19 (COVID19 (UNKNOWN))	106
COVID19 (COVID19 (JANSSEN))	107													COVID19 (COVID19 (MODERNA))	107													COVID19 (COVID19 (PFIZER-BIONTECH))	107													COVID19 (COVID19 (UNKNOWN))	107
COVID19 (COVID19 (JANSSEN))	108													COVID19 (COVID19 (MODERNA))	108													COVID19 (COVID19 (PFIZER-BIONTECH))	108													COVID19 (COVID19 (UNKNOWN))	108
COVID19 (COVID19 (JANSSEN))	109													COVID19 (COVID19 (MODERNA))	109													COVID19 (COVID19 (PFIZER-BIONTECH))	109													COVID19 (COVID19 (UNKNOWN))	109
COVID19 (COVID19 (JANSSEN))	110													COVID19 (COVID19 (MODERNA))	110													COVID19 (COVID19 (PFIZER-BIONTECH))	110													COVID19 (COVID19 (UNKNOWN))	110
COVID19 (COVID19 (JANSSEN))	111													COVID19 (COVID19 (MODERNA))	111													COVID19 (COVID19 (PFIZER-BIONTECH))	111													COVID19 (COVID19 (UNKNOWN))	111
COVID19 (COVID19 (JANSSEN))	112													COVID19 (COVID19 (MODERNA))	112													COVID19 (COVID19 (PFIZER-BIONTECH))	112													COVID19 (COVID19 (UNKNOWN))	112
COVID19 (COVID19 (JANSSEN))	113													COVID19 (COVID19 (MODERNA))	113													COVID19 (COVID19 (PFIZER-BIONTECH))	113													COVID19 (COVID19 (UNKNOWN))	113
COVID19 (COVID19 (JANSSEN))	114													COVID19 (COVID19 (MODERNA))	114													COVID19 (COVID19 (PFIZER-BIONTECH))	114													COVID19 (COVID19 (UNKNOWN))	114
COVID19 (COVID19 (JANSSEN))	115													COVID19 (COVID19 (MODERNA))	115													COVID19 (COVID19 (PFIZER-BIONTECH))	115													COVID19 (COVID19 (UNKNOWN))	115
COVID19 (COVID19 (JANSSEN))	116													COVID19 (COVID19 (MODERNA))	116													COVID19 (COVID19 (PFIZER-BIONTECH))	116													COVID19 (COVID19 (UNKNOWN))	116
COVID19 (COVID19 (JANSSEN))	117													COVID19 (COVID19 (MODERNA))	117													COVID19 (COVID19 (PFIZER-BIONTECH))	117													COVID19 (COVID19 (UNKNOWN))	117
COVID19 (COVID19 (JANSSEN))	118													COVID19 (COVID19 (MODERNA))	118													COVID19 (COVID19 (PFIZER-BIONTECH))	118													COVID19 (COVID19 (UNKNOWN))	118
COVID19 (COVID19 (JANSSEN))	119													COVID19 (COVID19 (MODERNA))	119													COVID19 (COVID19 (PFIZER-BIONTECH))	119													COVID19 (COVID19 (UNKNOWN))	119
COVID19 (COVID19 (JANSSEN))	120													COVID19 (COVID19 (MODERNA))	120													COVID19 (COVID19 (PFIZER-BIONTECH))	120													COVID19 (COVID19 (UNKNOWN))	120
Onset report
COVID19 (COVID19 (JANSSEN))	Onset	All	1	2	3	All Male	1 Male	2 Male	3 Male	All Female	1 Female	2 Female	3 Female	COVID19 (COVID19 (MODERNA))	Onset	All	1	2	3	All Male	1 Male	2 Male	3 Male	All Female	1 Female	2 Female	3 Female	COVID19 (COVID19 (PFIZER-BIONTECH))	Onset	All	1	2	3	All Male	1 Male	2 Male	3 Male	All Female	1 Female	2 Female	3 Female	COVID19 (COVID19 (UNKNOWN))	Onset	All	1	2	3	All Male	1 Male
COVID19 (COVID19 (JANSSEN))	0	40	12							40	12			COVID19 (COVID19 (MODERNA))	0	159	93	47	1					159	93	47	1	COVID19 (COVID19 (PFIZER-BIONTECH))	0	1061	566	410	7	1		1		1060	566	409	7	COVID19 (COVID19 (UNKNOWN))	0	1			1
COVID19 (COVID19 (JANSSEN))	1	7	6							7	6			COVID19 (COVID19 (MODERNA))	1	57	33	18	1	1	1			56	32	18	1	COVID19 (COVID19 (PFIZER-BIONTECH))	1	183	94	80						183	94	80		COVID19 (COVID19 (UNKNOWN))	1
COVID19 (COVID19 (JANSSEN))	2	2	2							2	2			COVID19 (COVID19 (MODERNA))	2	19	11	3						19	11	3		COVID19 (COVID19 (PFIZER-BIONTECH))	2	79	47	24	1					79	47	24	1	COVID19 (COVID19 (UNKNOWN))	2
COVID19 (COVID19 (JANSSEN))	3	5	4			1				4	4			COVID19 (COVID19 (MODERNA))	3	22	14	6						22	14	6		COVID19 (COVID19 (PFIZER-BIONTECH))	3	72	41	24						72	41	24		COVID19 (COVID19 (UNKNOWN))	3	1	1
COVID19 (COVID19 (JANSSEN))	4	3	2							3	2			COVID19 (COVID19 (MODERNA))	4	18	9	6						18	9	6		COVID19 (COVID19 (PFIZER-BIONTECH))	4	62	33	23	1					62	33	23	1	COVID19 (COVID19 (UNKNOWN))	4
COVID19 (COVID19 (JANSSEN))	5													COVID19 (COVID19 (MODERNA))	5	11	7	3						11	7	3		COVID19 (COVID19 (PFIZER-BIONTECH))	5	73	45	25						73	45	25		COVID19 (COVID19 (UNKNOWN))	5
COVID19 (COVID19 (JANSSEN))	6	1	1							1	1			COVID19 (COVID19 (MODERNA))	6	14	9	3						14	9	3		COVID19 (COVID19 (PFIZER-BIONTECH))	6	68	51	11						68	51	11		COVID19 (COVID19 (UNKNOWN))	6
COVID19 (COVID19 (JANSSEN))	7	3	1							3	1			COVID19 (COVID19 (MODERNA))	7	11	3	2						11	3	2		COVID19 (COVID19 (PFIZER-BIONTECH))	7	68	38	25						68	38	25		COVID19 (COVID19 (UNKNOWN))	7
COVID19 (COVID19 (JANSSEN))	8	1	1							1	1			COVID19 (COVID19 (MODERNA))	8	7	5	2						7	5	2		COVID19 (COVID19 (PFIZER-BIONTECH))	8	41	24	15	1					41	24	15	1	COVID19 (COVID19 (UNKNOWN))	8
COVID19 (COVID19 (JANSSEN))	9	1								1				COVID19 (COVID19 (MODERNA))	9	7	2	2	1					7	2	2	1	COVID19 (COVID19 (PFIZER-BIONTECH))	9	37	26	10						37	26	10		COVID19 (COVID19 (UNKNOWN))	9
COVID19 (COVID19 (JANSSEN))	10	1	1							1	1			COVID19 (COVID19 (MODERNA))	10	7	5	2						7	5	2		COVID19 (COVID19 (PFIZER-BIONTECH))	10	41	23	12	1					41	23	12	1	COVID19 (COVID19 (UNKNOWN))	10
COVID19 (COVID19 (JANSSEN))	11	1	1							1	1			COVID19 (COVID19 (MODERNA))	11	5	2	2						5	2	2		COVID19 (COVID19 (PFIZER-BIONTECH))	11	35	20	11						35	20	11		COVID19 (COVID19 (UNKNOWN))	11
COVID19 (COVID19 (JANSSEN))	12													COVID19 (COVID19 (MODERNA))	12	5	3	1						5	3	1		COVID19 (COVID19 (PFIZER-BIONTECH))	12	34	21	9						34	21	9		COVID19 (COVID19 (UNKNOWN))	12
COVID19 (COVID19 (JANSSEN))	13													COVID19 (COVID19 (MODERNA))	13	10	5	5						10	5	5		COVID19 (COVID19 (PFIZER-BIONTECH))	13	24	17	7						24	17	7		COVID19 (COVID19 (UNKNOWN))	13	1	1
COVID19 (COVID19 (JANSSEN))	14	2	2							2	2			COVID19 (COVID19 (MODERNA))	14	9	4	5						9	4	5		COVID19 (COVID19 (PFIZER-BIONTECH))	14	31	17	9						31	17	9		COVID19 (COVID19 (UNKNOWN))	14
COVID19 (COVID19 (JANSSEN))	15													COVID19 (COVID19 (MODERNA))	15	1								1				COVID19 (COVID19 (PFIZER-BIONTECH))	15	32	16	14						32	16	14		COVID19 (COVID19 (UNKNOWN))	15	1	1
COVID19 (COVID19 (JANSSEN))	16													COVID19 (COVID19 (MODERNA))	16	8	7	1						8	7	1		COVID19 (COVID19 (PFIZER-BIONTECH))	16	17	10	5						17	10	5		COVID19 (COVID19 (UNKNOWN))	16
COVID19 (COVID19 (JANSSEN))	17	2								2				COVID19 (COVID19 (MODERNA))	17	9	8							9	8			COVID19 (COVID19 (PFIZER-BIONTECH))	17	33	18	12						33	18	12		COVID19 (COVID19 (UNKNOWN))	17
COVID19 (COVID19 (JANSSEN))	18	1	1							1	1			COVID19 (COVID19 (MODERNA))	18	10	3	4						10	3	4		COVID19 (COVID19 (PFIZER-BIONTECH))	18	25	13	7						25	13	7		COVID19 (COVID19 (UNKNOWN))	18
COVID19 (COVID19 (JANSSEN))	19													COVID19 (COVID19 (MODERNA))	19	8	5	1						8	5	1		COVID19 (COVID19 (PFIZER-BIONTECH))	19	19	10	9						19	10	9		COVID19 (COVID19 (UNKNOWN))	19
COVID19 (COVID19 (JANSSEN))	20	2	2							2	2			COVID19 (COVID19 (MODERNA))	20	4	2	1						4	2	1		COVID19 (COVID19 (PFIZER-BIONTECH))	20	17	10	5						17	10	5		COVID19 (COVID19 (UNKNOWN))	20
COVID19 (COVID19 (JANSSEN))	21	2	2							2	2			COVID19 (COVID19 (MODERNA))	21	3	1	1						3	1	1		COVID19 (COVID19 (PFIZER-BIONTECH))	21	28	17	10						28	17	10		COVID19 (COVID19 (UNKNOWN))	21	1	1
COVID19 (COVID19 (JANSSEN))	22	1	1							1	1			COVID19 (COVID19 (MODERNA))	22	5	3	1						5	3	1		COVID19 (COVID19 (PFIZER-BIONTECH))	22	24	10	10						24	10	10		COVID19 (COVID19 (UNKNOWN))	22
COVID19 (COVID19 (JANSSEN))	23													COVID19 (COVID19 (MODERNA))	23	4	3	1						4	3	1		COVID19 (COVID19 (PFIZER-BIONTECH))	23	18	12	3						18	12	3		COVID19 (COVID19 (UNKNOWN))	23
COVID19 (COVID19 (JANSSEN))	24	1	1							1	1			COVID19 (COVID19 (MODERNA))	24	4	1	3						4	1	3		COVID19 (COVID19 (PFIZER-BIONTECH))	24	15	11	3						15	11	3		COVID19 (COVID19 (UNKNOWN))	24
COVID19 (COVID19 (JANSSEN))	25	1	1							1	1			COVID19 (COVID19 (MODERNA))	25	5	4	1						5	4	1		COVID19 (COVID19 (PFIZER-BIONTECH))	25	24	13	10						24	13	10		COVID19 (COVID19 (UNKNOWN))	25
COVID19 (COVID19 (JANSSEN))	26													COVID19 (COVID19 (MODERNA))	26	3	1	1						3	1	1		COVID19 (COVID19 (PFIZER-BIONTECH))	26	16	7	5						16	7	5		COVID19 (COVID19 (UNKNOWN))	26
COVID19 (COVID19 (JANSSEN))	27	1	1							1	1			COVID19 (COVID19 (MODERNA))	27	6	2	3						6	2	3		COVID19 (COVID19 (PFIZER-BIONTECH))	27	12	7	5						12	7	5		COVID19 (COVID19 (UNKNOWN))	27
COVID19 (COVID19 (JANSSEN))	28													COVID19 (COVID19 (MODERNA))	28	15	8	6						15	8	6		COVID19 (COVID19 (PFIZER-BIONTECH))	28	20	15	4						20	15	4		COVID19 (COVID19 (UNKNOWN))	28
COVID19 (COVID19 (JANSSEN))	29	1	1							1	1			COVID19 (COVID19 (MODERNA))	29	4	2	1						4	2	1		COVID19 (COVID19 (PFIZER-BIONTECH))	29	19	10	7						19	10	7		COVID19 (COVID19 (UNKNOWN))	29
COVID19 (COVID19 (JANSSEN))	30	1	1							1	1			COVID19 (COVID19 (MODERNA))	30	4	1	3						4	1	3		COVID19 (COVID19 (PFIZER-BIONTECH))	30	14	6	8						14	6	8		COVID19 (COVID19 (UNKNOWN))	30
COVID19 (COVID19 (JANSSEN))	31	1								1				COVID19 (COVID19 (MODERNA))	31	14	6	5						14	6	5		COVID19 (COVID19 (PFIZER-BIONTECH))	31	21	9	9						21	9	9		COVID19 (COVID19 (UNKNOWN))	31
COVID19 (COVID19 (JANSSEN))	32													COVID19 (COVID19 (MODERNA))	32	2	1	1						2	1	1		COVID19 (COVID19 (PFIZER-BIONTECH))	32	14	7	4						14	7	4		COVID19 (COVID19 (UNKNOWN))	32
COVID19 (COVID19 (JANSSEN))	33	1	1							1	1			COVID19 (COVID19 (MODERNA))	33	5	3	1						5	3	1		COVID19 (COVID19 (PFIZER-BIONTECH))	33	9	5	4						9	5	4		COVID19 (COVID19 (UNKNOWN))	33
COVID19 (COVID19 (JANSSEN))	34	1	1							1	1			COVID19 (COVID19 (MODERNA))	34	2		2						2		2		COVID19 (COVID19 (PFIZER-BIONTECH))	34	6	1	4						6	1	4		COVID19 (COVID19 (UNKNOWN))	34
COVID19 (COVID19 (JANSSEN))	35													COVID19 (COVID19 (MODERNA))	35	5	3	2						5	3	2		COVID19 (COVID19 (PFIZER-BIONTECH))	35	6	3	2						6	3	2		COVID19 (COVID19 (UNKNOWN))	35
COVID19 (COVID19 (JANSSEN))	36													COVID19 (COVID19 (MODERNA))	36	1		1						1		1		COVID19 (COVID19 (PFIZER-BIONTECH))	36	13	7	4						13	7	4		COVID19 (COVID19 (UNKNOWN))	36
COVID19 (COVID19 (JANSSEN))	37													COVID19 (COVID19 (MODERNA))	37	3	1	1						3	1	1		COVID19 (COVID19 (PFIZER-BIONTECH))	37	13	9	4						13	9	4		COVID19 (COVID19 (UNKNOWN))	37
COVID19 (COVID19 (JANSSEN))	38	3	2							3	2			COVID19 (COVID19 (MODERNA))	38	3	2	1						3	2	1		COVID19 (COVID19 (PFIZER-BIONTECH))	38	5	4	1						5	4	1		COVID19 (COVID19 (UNKNOWN))	38
COVID19 (COVID19 (JANSSEN))	39													COVID19 (COVID19 (MODERNA))	39	2	1	1						2	1	1		COVID19 (COVID19 (PFIZER-BIONTECH))	39	8	4	3						8	4	3		COVID19 (COVID19 (UNKNOWN))	39
COVID19 (COVID19 (JANSSEN))	40													COVID19 (COVID19 (MODERNA))	40	3	3							3	3			COVID19 (COVID19 (PFIZER-BIONTECH))	40	8	4	3						8	4	3		COVID19 (COVID19 (UNKNOWN))	40
COVID19 (COVID19 (JANSSEN))	41													COVID19 (COVID19 (MODERNA))	41													COVID19 (COVID19 (PFIZER-BIONTECH))	41	3	2	1						3	2	1		COVID19 (COVID19 (UNKNOWN))	41
COVID19 (COVID19 (JANSSEN))	42													COVID19 (COVID19 (MODERNA))	42													COVID19 (COVID19 (PFIZER-BIONTECH))	42	10	6	4						10	6	4		COVID19 (COVID19 (UNKNOWN))	42
COVID19 (COVID19 (JANSSEN))	43													COVID19 (COVID19 (MODERNA))	43													COVID19 (COVID19 (PFIZER-BIONTECH))	43	4	2	2						4	2	2		COVID19 (COVID19 (UNKNOWN))	43
COVID19 (COVID19 (JANSSEN))	44	2	2							2	2			COVID19 (COVID19 (MODERNA))	44	1		1						1		1		COVID19 (COVID19 (PFIZER-BIONTECH))	44	4	2	2						4	2	2		COVID19 (COVID19 (UNKNOWN))	44
COVID19 (COVID19 (JANSSEN))	45													COVID19 (COVID19 (MODERNA))	45	1		1						1		1		COVID19 (COVID19 (PFIZER-BIONTECH))	45	4	2	2						4	2	2		COVID19 (COVID19 (UNKNOWN))	45
COVID19 (COVID19 (JANSSEN))	46													COVID19 (COVID19 (MODERNA))	46	2		2						2		2		COVID19 (COVID19 (PFIZER-BIONTECH))	46	3		3						3		3		COVID19 (COVID19 (UNKNOWN))	46
COVID19 (COVID19 (JANSSEN))	47													COVID19 (COVID19 (MODERNA))	47	3	1	2						3	1	2		COVID19 (COVID19 (PFIZER-BIONTECH))	47	4	3	1						4	3	1		COVID19 (COVID19 (UNKNOWN))	47
COVID19 (COVID19 (JANSSEN))	48													COVID19 (COVID19 (MODERNA))	48	4	2	2						4	2	2		COVID19 (COVID19 (PFIZER-BIONTECH))	48	2		2						2		2		COVID19 (COVID19 (UNKNOWN))	48
COVID19 (COVID19 (JANSSEN))	49													COVID19 (COVID19 (MODERNA))	49	1	1							1	1			COVID19 (COVID19 (PFIZER-BIONTECH))	49	7	6	1						7	6	1		COVID19 (COVID19 (UNKNOWN))	49
COVID19 (COVID19 (JANSSEN))	50													COVID19 (COVID19 (MODERNA))	50	3	1	1						3	1	1		COVID19 (COVID19 (PFIZER-BIONTECH))	50	3		2						3		2		COVID19 (COVID19 (UNKNOWN))	50
COVID19 (COVID19 (JANSSEN))	51													COVID19 (COVID19 (MODERNA))	51													COVID19 (COVID19 (PFIZER-BIONTECH))	51	4	2	2						4	2	2		COVID19 (COVID19 (UNKNOWN))	51
COVID19 (COVID19 (JANSSEN))	52													COVID19 (COVID19 (MODERNA))	52													COVID19 (COVID19 (PFIZER-BIONTECH))	52	2	1	1						2	1	1		COVID19 (COVID19 (UNKNOWN))	52
COVID19 (COVID19 (JANSSEN))	53													COVID19 (COVID19 (MODERNA))	53													COVID19 (COVID19 (PFIZER-BIONTECH))	53													COVID19 (COVID19 (UNKNOWN))	53
COVID19 (COVID19 (JANSSEN))	54													COVID19 (COVID19 (MODERNA))	54													COVID19 (COVID19 (PFIZER-BIONTECH))	54	1	1							1	1			COVID19 (COVID19 (UNKNOWN))	54
COVID19 (COVID19 (JANSSEN))	55	1	1							1	1			COVID19 (COVID19 (MODERNA))	55													COVID19 (COVID19 (PFIZER-BIONTECH))	55	2	1	1						2	1	1		COVID19 (COVID19 (UNKNOWN))	55
COVID19 (COVID19 (JANSSEN))	56													COVID19 (COVID19 (MODERNA))	56	5	3	2						5	3	2		COVID19 (COVID19 (PFIZER-BIONTECH))	56	4	2	2						4	2	2		COVID19 (COVID19 (UNKNOWN))	56
COVID19 (COVID19 (JANSSEN))	57													COVID19 (COVID19 (MODERNA))	57													COVID19 (COVID19 (PFIZER-BIONTECH))	57	2	2							2	2			COVID19 (COVID19 (UNKNOWN))	57
COVID19 (COVID19 (JANSSEN))	58													COVID19 (COVID19 (MODERNA))	58													COVID19 (COVID19 (PFIZER-BIONTECH))	58	1								1				COVID19 (COVID19 (UNKNOWN))	58
COVID19 (COVID19 (JANSSEN))	59													COVID19 (COVID19 (MODERNA))	59	1		1						1		1		COVID19 (COVID19 (PFIZER-BIONTECH))	59	2	1	1						2	1	1		COVID19 (COVID19 (UNKNOWN))	59
COVID19 (COVID19 (JANSSEN))	60													COVID19 (COVID19 (MODERNA))	60													COVID19 (COVID19 (PFIZER-BIONTECH))	60													COVID19 (COVID19 (UNKNOWN))	60
COVID19 (COVID19 (JANSSEN))	61	1								1				COVID19 (COVID19 (MODERNA))	61	3	2	1						3	2	1		COVID19 (COVID19 (PFIZER-BIONTECH))	61	5	3							5	3			COVID19 (COVID19 (UNKNOWN))	61
COVID19 (COVID19 (JANSSEN))	62													COVID19 (COVID19 (MODERNA))	62	1	1							1	1			COVID19 (COVID19 (PFIZER-BIONTECH))	62	2	1	1						2	1	1		COVID19 (COVID19 (UNKNOWN))	62
COVID19 (COVID19 (JANSSEN))	63	1	1							1	1			COVID19 (COVID19 (MODERNA))	63	2	2							2	2			COVID19 (COVID19 (PFIZER-BIONTECH))	63	2	2							2	2			COVID19 (COVID19 (UNKNOWN))	63
COVID19 (COVID19 (JANSSEN))	64													COVID19 (COVID19 (MODERNA))	64													COVID19 (COVID19 (PFIZER-BIONTECH))	64													COVID19 (COVID19 (UNKNOWN))	64
COVID19 (COVID19 (JANSSEN))	65													COVID19 (COVID19 (MODERNA))	65	2	1	1						2	1	1		COVID19 (COVID19 (PFIZER-BIONTECH))	65	3	3							3	3			COVID19 (COVID19 (UNKNOWN))	65
COVID19 (COVID19 (JANSSEN))	66													COVID19 (COVID19 (MODERNA))	66													COVID19 (COVID19 (PFIZER-BIONTECH))	66	2	2							2	2			COVID19 (COVID19 (UNKNOWN))	66
COVID19 (COVID19 (JANSSEN))	67													COVID19 (COVID19 (MODERNA))	67													COVID19 (COVID19 (PFIZER-BIONTECH))	67	1		1						1		1		COVID19 (COVID19 (UNKNOWN))	67
COVID19 (COVID19 (JANSSEN))	68													COVID19 (COVID19 (MODERNA))	68													COVID19 (COVID19 (PFIZER-BIONTECH))	68	3	1	2						3	1	2		COVID19 (COVID19 (UNKNOWN))	68
COVID19 (COVID19 (JANSSEN))	69													COVID19 (COVID19 (MODERNA))	69	2	1	1						2	1	1		COVID19 (COVID19 (PFIZER-BIONTECH))	69													COVID19 (COVID19 (UNKNOWN))	69
COVID19 (COVID19 (JANSSEN))	70													COVID19 (COVID19 (MODERNA))	70													COVID19 (COVID19 (PFIZER-BIONTECH))	70	3	1	2						3	1	2		COVID19 (COVID19 (UNKNOWN))	70
COVID19 (COVID19 (JANSSEN))	71													COVID19 (COVID19 (MODERNA))	71													COVID19 (COVID19 (PFIZER-BIONTECH))	71	2		1						2		1		COVID19 (COVID19 (UNKNOWN))	71
COVID19 (COVID19 (JANSSEN))	72													COVID19 (COVID19 (MODERNA))	72													COVID19 (COVID19 (PFIZER-BIONTECH))	72													COVID19 (COVID19 (UNKNOWN))	72
COVID19 (COVID19 (JANSSEN))	73													COVID19 (COVID19 (MODERNA))	73													COVID19 (COVID19 (PFIZER-BIONTECH))	73													COVID19 (COVID19 (UNKNOWN))	73
COVID19 (COVID19 (JANSSEN))	74													COVID19 (COVID19 (MODERNA))	74	1	1							1	1			COVID19 (COVID19 (PFIZER-BIONTECH))	74													COVID19 (COVID19 (UNKNOWN))	74
COVID19 (COVID19 (JANSSEN))	75													COVID19 (COVID19 (MODERNA))	75													COVID19 (COVID19 (PFIZER-BIONTECH))	75	1		1						1		1		COVID19 (COVID19 (UNKNOWN))	75
COVID19 (COVID19 (JANSSEN))	76													COVID19 (COVID19 (MODERNA))	76													COVID19 (COVID19 (PFIZER-BIONTECH))	76													COVID19 (COVID19 (UNKNOWN))	76
COVID19 (COVID19 (JANSSEN))	77													COVID19 (COVID19 (MODERNA))	77	1	1							1	1			COVID19 (COVID19 (PFIZER-BIONTECH))	77	3	2	1						3	2	1		COVID19 (COVID19 (UNKNOWN))	77
COVID19 (COVID19 (JANSSEN))	78													COVID19 (COVID19 (MODERNA))	78	2	1	1						2	1	1		COVID19 (COVID19 (PFIZER-BIONTECH))	78													COVID19 (COVID19 (UNKNOWN))	78
COVID19 (COVID19 (JANSSEN))	79													COVID19 (COVID19 (MODERNA))	79													COVID19 (COVID19 (PFIZER-BIONTECH))	79													COVID19 (COVID19 (UNKNOWN))	79
COVID19 (COVID19 (JANSSEN))	80													COVID19 (COVID19 (MODERNA))	80													COVID19 (COVID19 (PFIZER-BIONTECH))	80													COVID19 (COVID19 (UNKNOWN))	80
COVID19 (COVID19 (JANSSEN))	81													COVID19 (COVID19 (MODERNA))	81	2	2							2	2			COVID19 (COVID19 (PFIZER-BIONTECH))	81	3	2	1						3	2	1		COVID19 (COVID19 (UNKNOWN))	81
COVID19 (COVID19 (JANSSEN))	82													COVID19 (COVID19 (MODERNA))	82													COVID19 (COVID19 (PFIZER-BIONTECH))	82													COVID19 (COVID19 (UNKNOWN))	82
COVID19 (COVID19 (JANSSEN))	83													COVID19 (COVID19 (MODERNA))	83	1		1						1		1		COVID19 (COVID19 (PFIZER-BIONTECH))	83	1	1							1	1			COVID19 (COVID19 (UNKNOWN))	83
COVID19 (COVID19 (JANSSEN))	84													COVID19 (COVID19 (MODERNA))	84													COVID19 (COVID19 (PFIZER-BIONTECH))	84	1	1							1	1			COVID19 (COVID19 (UNKNOWN))	84
COVID19 (COVID19 (JANSSEN))	85													COVID19 (COVID19 (MODERNA))	85													COVID19 (COVID19 (PFIZER-BIONTECH))	85													COVID19 (COVID19 (UNKNOWN))	85
COVID19 (COVID19 (JANSSEN))	86													COVID19 (COVID19 (MODERNA))	86	2	1	1						2	1	1		COVID19 (COVID19 (PFIZER-BIONTECH))	86													COVID19 (COVID19 (UNKNOWN))	86
COVID19 (COVID19 (JANSSEN))	87													COVID19 (COVID19 (MODERNA))	87	1		1						1		1		COVID19 (COVID19 (PFIZER-BIONTECH))	87	1	1							1	1			COVID19 (COVID19 (UNKNOWN))	87
COVID19 (COVID19 (JANSSEN))	88													COVID19 (COVID19 (MODERNA))	88													COVID19 (COVID19 (PFIZER-BIONTECH))	88													COVID19 (COVID19 (UNKNOWN))	88
COVID19 (COVID19 (JANSSEN))	89													COVID19 (COVID19 (MODERNA))	89	1								1				COVID19 (COVID19 (PFIZER-BIONTECH))	89	1	1							1	1			COVID19 (COVID19 (UNKNOWN))	89
COVID19 (COVID19 (JANSSEN))	90													COVID19 (COVID19 (MODERNA))	90													COVID19 (COVID19 (PFIZER-BIONTECH))	90	1		1						1		1		COVID19 (COVID19 (UNKNOWN))	90
COVID19 (COVID19 (JANSSEN))	91													COVID19 (COVID19 (MODERNA))	91	2		1						2		1		COVID19 (COVID19 (PFIZER-BIONTECH))	91	5	1	4						5	1	4		COVID19 (COVID19 (UNKNOWN))	91
COVID19 (COVID19 (JANSSEN))	92													COVID19 (COVID19 (MODERNA))	92	1	1							1	1			COVID19 (COVID19 (PFIZER-BIONTECH))	92	1		1						1		1		COVID19 (COVID19 (UNKNOWN))	92
COVID19 (COVID19 (JANSSEN))	93													COVID19 (COVID19 (MODERNA))	93													COVID19 (COVID19 (PFIZER-BIONTECH))	93	2	2							2	2			COVID19 (COVID19 (UNKNOWN))	93
COVID19 (COVID19 (JANSSEN))	94													COVID19 (COVID19 (MODERNA))	94													COVID19 (COVID19 (PFIZER-BIONTECH))	94													COVID19 (COVID19 (UNKNOWN))	94
COVID19 (COVID19 (JANSSEN))	95													COVID19 (COVID19 (MODERNA))	95													COVID19 (COVID19 (PFIZER-BIONTECH))	95	1		1						1		1		COVID19 (COVID19 (UNKNOWN))	95
COVID19 (COVID19 (JANSSEN))	96													COVID19 (COVID19 (MODERNA))	96													COVID19 (COVID19 (PFIZER-BIONTECH))	96													COVID19 (COVID19 (UNKNOWN))	96
COVID19 (COVID19 (JANSSEN))	97													COVID19 (COVID19 (MODERNA))	97													COVID19 (COVID19 (PFIZER-BIONTECH))	97	2		2						2		2		COVID19 (COVID19 (UNKNOWN))	97
COVID19 (COVID19 (JANSSEN))	98													COVID19 (COVID19 (MODERNA))	98													COVID19 (COVID19 (PFIZER-BIONTECH))	98	1	1							1	1			COVID19 (COVID19 (UNKNOWN))	98
COVID19 (COVID19 (JANSSEN))	99													COVID19 (COVID19 (MODERNA))	99													COVID19 (COVID19 (PFIZER-BIONTECH))	99													COVID19 (COVID19 (UNKNOWN))	99
COVID19 (COVID19 (JANSSEN))	100													COVID19 (COVID19 (MODERNA))	100													COVID19 (COVID19 (PFIZER-BIONTECH))	100													COVID19 (COVID19 (UNKNOWN))	100
COVID19 (COVID19 (JANSSEN))	101													COVID19 (COVID19 (MODERNA))	101	1		1						1		1		COVID19 (COVID19 (PFIZER-BIONTECH))	101	2	1	1						2	1	1		COVID19 (COVID19 (UNKNOWN))	101
COVID19 (COVID19 (JANSSEN))	102													COVID19 (COVID19 (MODERNA))	102													COVID19 (COVID19 (PFIZER-BIONTECH))	102	1	1							1	1			COVID19 (COVID19 (UNKNOWN))	102
COVID19 (COVID19 (JANSSEN))	103													COVID19 (COVID19 (MODERNA))	103													COVID19 (COVID19 (PFIZER-BIONTECH))	103	1	1							1	1			COVID19 (COVID19 (UNKNOWN))	103
COVID19 (COVID19 (JANSSEN))	104													COVID19 (COVID19 (MODERNA))	104													COVID19 (COVID19 (PFIZER-BIONTECH))	104													COVID19 (COVID19 (UNKNOWN))	104
COVID19 (COVID19 (JANSSEN))	105													COVID19 (COVID19 (MODERNA))	105													COVID19 (COVID19 (PFIZER-BIONTECH))	105													COVID19 (COVID19 (UNKNOWN))	105
COVID19 (COVID19 (JANSSEN))	106													COVID19 (COVID19 (MODERNA))	106													COVID19 (COVID19 (PFIZER-BIONTECH))	106													COVID19 (COVID19 (UNKNOWN))	106
COVID19 (COVID19 (JANSSEN))	107													COVID19 (COVID19 (MODERNA))	107													COVID19 (COVID19 (PFIZER-BIONTECH))	107													COVID19 (COVID19 (UNKNOWN))	107
COVID19 (COVID19 (JANSSEN))	108													COVID19 (COVID19 (MODERNA))	108													COVID19 (COVID19 (PFIZER-BIONTECH))	108	2		2						2		2		COVID19 (COVID19 (UNKNOWN))	108
COVID19 (COVID19 (JANSSEN))	109													COVID19 (COVID19 (MODERNA))	109	2	1	1						2	1	1		COVID19 (COVID19 (PFIZER-BIONTECH))	109													COVID19 (COVID19 (UNKNOWN))	109
COVID19 (COVID19 (JANSSEN))	110													COVID19 (COVID19 (MODERNA))	110													COVID19 (COVID19 (PFIZER-BIONTECH))	110													COVID19 (COVID19 (UNKNOWN))	110
COVID19 (COVID19 (JANSSEN))	111													COVID19 (COVID19 (MODERNA))	111													COVID19 (COVID19 (PFIZER-BIONTECH))	111													COVID19 (COVID19 (UNKNOWN))	111
COVID19 (COVID19 (JANSSEN))	112													COVID19 (COVID19 (MODERNA))	112													COVID19 (COVID19 (PFIZER-BIONTECH))	112													COVID19 (COVID19 (UNKNOWN))	112
COVID19 (COVID19 (JANSSEN))	113													COVID19 (COVID19 (MODERNA))	113													COVID19 (COVID19 (PFIZER-BIONTECH))	113													COVID19 (COVID19 (UNKNOWN))	113
COVID19 (COVID19 (JANSSEN))	114													COVID19 (COVID19 (MODERNA))	114													COVID19 (COVID19 (PFIZER-BIONTECH))	114													COVID19 (COVID19 (UNKNOWN))	114
COVID19 (COVID19 (JANSSEN))	115													COVID19 (COVID19 (MODERNA))	115													COVID19 (COVID19 (PFIZER-BIONTECH))	115													COVID19 (COVID19 (UNKNOWN))	115
COVID19 (COVID19 (JANSSEN))	116													COVID19 (COVID19 (MODERNA))	116													COVID19 (COVID19 (PFIZER-BIONTECH))	116													COVID19 (COVID19 (UNKNOWN))	116
COVID19 (COVID19 (JANSSEN))	117													COVID19 (COVID19 (MODERNA))	117													COVID19 (COVID19 (PFIZER-BIONTECH))	117													COVID19 (COVID19 (UNKNOWN))	117
COVID19 (COVID19 (JANSSEN))	118													COVID19 (COVID19 (MODERNA))	118													COVID19 (COVID19 (PFIZER-BIONTECH))	118													COVID19 (COVID19 (UNKNOWN))	118
COVID19 (COVID19 (JANSSEN))	119													COVID19 (COVID19 (MODERNA))	119													COVID19 (COVID19 (PFIZER-BIONTECH))	119													COVID19 (COVID19 (UNKNOWN))	119
COVID19 (COVID19 (JANSSEN))	120													COVID19 (COVID19 (MODERNA))	120													COVID19 (COVID19 (PFIZER-BIONTECH))	120													COVID19 (COVID19 (UNKNOWN))	120
[truncated: 370 more columns]

## Sheet: All_menstrual_discomfort
Dose report
Vaccine	All	1	2	3	4	5	6	7+	UNK	N/A
HEP B (NO BRAND NAME)	1			1
HPV (GARDASIL)	2			2
MENINGOCOCCAL CONJUGATE (MENACTRA)	1	1
COVID19 (COVID19 (PFIZER-BIONTECH))	60	28	24						8
COVID19 (COVID19 (MODERNA))	21	11	9						1
COVID19 (COVID19 (JANSSEN))	1									1
HPV (CERVARIX)	1			1
HPV (GARDASIL 9)	1								1
Total	88
COVID-19	82
COVID-19 %	0.931818
Age report
COVID19 (COVID19 (JANSSEN))	Age	All	1	2	3	All Male	1 Male	2 Male	3 Male	All Female	1 Female	2 Female	3 Female	COVID19 (COVID19 (MODERNA))	Age	All	1	2	3	All Male	1 Male	2 Male	3 Male	All Female	1 Female	2 Female	3 Female	COVID19 (COVID19 (PFIZER-BIONTECH))	Age	All	1	2	3	All Male	1 Male	2 Male	3 Male	All Female	1 Female	2 Female	3 Female	HEP B (NO BRAND NAME)	Age	All	1	2	3	All Male	1 Male
COVID19 (COVID19 (JANSSEN))	0													COVID19 (COVID19 (MODERNA))	0	1	1							1	1			COVID19 (COVID19 (PFIZER-BIONTECH))	0	35	19	8						34	18	8		HEP B (NO BRAND NAME)	0
COVID19 (COVID19 (JANSSEN))	1													COVID19 (COVID19 (MODERNA))	1													COVID19 (COVID19 (PFIZER-BIONTECH))	1													HEP B (NO BRAND NAME)	1
COVID19 (COVID19 (JANSSEN))	2													COVID19 (COVID19 (MODERNA))	2													COVID19 (COVID19 (PFIZER-BIONTECH))	2													HEP B (NO BRAND NAME)	2
COVID19 (COVID19 (JANSSEN))	3													COVID19 (COVID19 (MODERNA))	3													COVID19 (COVID19 (PFIZER-BIONTECH))	3													HEP B (NO BRAND NAME)	3
COVID19 (COVID19 (JANSSEN))	4													COVID19 (COVID19 (MODERNA))	4													COVID19 (COVID19 (PFIZER-BIONTECH))	4													HEP B (NO BRAND NAME)	4
COVID19 (COVID19 (JANSSEN))	5													COVID19 (COVID19 (MODERNA))	5													COVID19 (COVID19 (PFIZER-BIONTECH))	5													HEP B (NO BRAND NAME)	5
COVID19 (COVID19 (JANSSEN))	6													COVID19 (COVID19 (MODERNA))	6													COVID19 (COVID19 (PFIZER-BIONTECH))	6													HEP B (NO BRAND NAME)	6
COVID19 (COVID19 (JANSSEN))	7													COVID19 (COVID19 (MODERNA))	7													COVID19 (COVID19 (PFIZER-BIONTECH))	7													HEP B (NO BRAND NAME)	7
COVID19 (COVID19 (JANSSEN))	8													COVID19 (COVID19 (MODERNA))	8													COVID19 (COVID19 (PFIZER-BIONTECH))	8													HEP B (NO BRAND NAME)	8
COVID19 (COVID19 (JANSSEN))	9													COVID19 (COVID19 (MODERNA))	9													COVID19 (COVID19 (PFIZER-BIONTECH))	9													HEP B (NO BRAND NAME)	9
COVID19 (COVID19 (JANSSEN))	10													COVID19 (COVID19 (MODERNA))	10													COVID19 (COVID19 (PFIZER-BIONTECH))	10													HEP B (NO BRAND NAME)	10
COVID19 (COVID19 (JANSSEN))	11													COVID19 (COVID19 (MODERNA))	11													COVID19 (COVID19 (PFIZER-BIONTECH))	11													HEP B (NO BRAND NAME)	11
COVID19 (COVID19 (JANSSEN))	12													COVID19 (COVID19 (MODERNA))	12													COVID19 (COVID19 (PFIZER-BIONTECH))	12													HEP B (NO BRAND NAME)	12
COVID19 (COVID19 (JANSSEN))	13													COVID19 (COVID19 (MODERNA))	13													COVID19 (COVID19 (PFIZER-BIONTECH))	13													HEP B (NO BRAND NAME)	13
COVID19 (COVID19 (JANSSEN))	14													COVID19 (COVID19 (MODERNA))	14													COVID19 (COVID19 (PFIZER-BIONTECH))	14													HEP B (NO BRAND NAME)	14
COVID19 (COVID19 (JANSSEN))	15													COVID19 (COVID19 (MODERNA))	15													COVID19 (COVID19 (PFIZER-BIONTECH))	15													HEP B (NO BRAND NAME)	15
COVID19 (COVID19 (JANSSEN))	16													COVID19 (COVID19 (MODERNA))	16													COVID19 (COVID19 (PFIZER-BIONTECH))	16													HEP B (NO BRAND NAME)	16
COVID19 (COVID19 (JANSSEN))	17													COVID19 (COVID19 (MODERNA))	17													COVID19 (COVID19 (PFIZER-BIONTECH))	17	1	1							1	1			HEP B (NO BRAND NAME)	17
COVID19 (COVID19 (JANSSEN))	18													COVID19 (COVID19 (MODERNA))	18	1	1							1	1			COVID19 (COVID19 (PFIZER-BIONTECH))	18													HEP B (NO BRAND NAME)	18
COVID19 (COVID19 (JANSSEN))	19													COVID19 (COVID19 (MODERNA))	19													COVID19 (COVID19 (PFIZER-BIONTECH))	19													HEP B (NO BRAND NAME)	19
COVID19 (COVID19 (JANSSEN))	20													COVID19 (COVID19 (MODERNA))	20	3	1	2						3	1	2		COVID19 (COVID19 (PFIZER-BIONTECH))	20													HEP B (NO BRAND NAME)	20
COVID19 (COVID19 (JANSSEN))	21													COVID19 (COVID19 (MODERNA))	21													COVID19 (COVID19 (PFIZER-BIONTECH))	21													HEP B (NO BRAND NAME)	21
COVID19 (COVID19 (JANSSEN))	22													COVID19 (COVID19 (MODERNA))	22													COVID19 (COVID19 (PFIZER-BIONTECH))	22	1		1						1		1		HEP B (NO BRAND NAME)	22
COVID19 (COVID19 (JANSSEN))	23													COVID19 (COVID19 (MODERNA))	23	1		1						1		1		COVID19 (COVID19 (PFIZER-BIONTECH))	23													HEP B (NO BRAND NAME)	23
COVID19 (COVID19 (JANSSEN))	24													COVID19 (COVID19 (MODERNA))	24	1		1						1		1		COVID19 (COVID19 (PFIZER-BIONTECH))	24													HEP B (NO BRAND NAME)	24
COVID19 (COVID19 (JANSSEN))	25													COVID19 (COVID19 (MODERNA))	25	1	1							1	1			COVID19 (COVID19 (PFIZER-BIONTECH))	25													HEP B (NO BRAND NAME)	25
COVID19 (COVID19 (JANSSEN))	26													COVID19 (COVID19 (MODERNA))	26	2	1	1						2	1	1		COVID19 (COVID19 (PFIZER-BIONTECH))	26													HEP B (NO BRAND NAME)	26
COVID19 (COVID19 (JANSSEN))	27	1								1				COVID19 (COVID19 (MODERNA))	27													COVID19 (COVID19 (PFIZER-BIONTECH))	27													HEP B (NO BRAND NAME)	27
COVID19 (COVID19 (JANSSEN))	28													COVID19 (COVID19 (MODERNA))	28													COVID19 (COVID19 (PFIZER-BIONTECH))	28	2	1	1						2	1	1		HEP B (NO BRAND NAME)	28
COVID19 (COVID19 (JANSSEN))	29													COVID19 (COVID19 (MODERNA))	29													COVID19 (COVID19 (PFIZER-BIONTECH))	29													HEP B (NO BRAND NAME)	29
COVID19 (COVID19 (JANSSEN))	30													COVID19 (COVID19 (MODERNA))	30													COVID19 (COVID19 (PFIZER-BIONTECH))	30													HEP B (NO BRAND NAME)	30
COVID19 (COVID19 (JANSSEN))	31													COVID19 (COVID19 (MODERNA))	31													COVID19 (COVID19 (PFIZER-BIONTECH))	31													HEP B (NO BRAND NAME)	31
COVID19 (COVID19 (JANSSEN))	32													COVID19 (COVID19 (MODERNA))	32													COVID19 (COVID19 (PFIZER-BIONTECH))	32													HEP B (NO BRAND NAME)	32
COVID19 (COVID19 (JANSSEN))	33													COVID19 (COVID19 (MODERNA))	33	2	1	1						2	1	1		COVID19 (COVID19 (PFIZER-BIONTECH))	33													HEP B (NO BRAND NAME)	33
COVID19 (COVID19 (JANSSEN))	34													COVID19 (COVID19 (MODERNA))	34													COVID19 (COVID19 (PFIZER-BIONTECH))	34	4		4						4		4		HEP B (NO BRAND NAME)	34
COVID19 (COVID19 (JANSSEN))	35													COVID19 (COVID19 (MODERNA))	35	1	1							1	1			COVID19 (COVID19 (PFIZER-BIONTECH))	35	2	2							2	2			HEP B (NO BRAND NAME)	35
COVID19 (COVID19 (JANSSEN))	36													COVID19 (COVID19 (MODERNA))	36													COVID19 (COVID19 (PFIZER-BIONTECH))	36													HEP B (NO BRAND NAME)	36
COVID19 (COVID19 (JANSSEN))	37													COVID19 (COVID19 (MODERNA))	37	1								1				COVID19 (COVID19 (PFIZER-BIONTECH))	37	1		1						1		1		HEP B (NO BRAND NAME)	37
COVID19 (COVID19 (JANSSEN))	38													COVID19 (COVID19 (MODERNA))	38													COVID19 (COVID19 (PFIZER-BIONTECH))	38	2	1	1						2	1	1		HEP B (NO BRAND NAME)	38
COVID19 (COVID19 (JANSSEN))	39													COVID19 (COVID19 (MODERNA))	39													COVID19 (COVID19 (PFIZER-BIONTECH))	39	1		1						1		1		HEP B (NO BRAND NAME)	39
COVID19 (COVID19 (JANSSEN))	40													COVID19 (COVID19 (MODERNA))	40													COVID19 (COVID19 (PFIZER-BIONTECH))	40													HEP B (NO BRAND NAME)	40
COVID19 (COVID19 (JANSSEN))	41													COVID19 (COVID19 (MODERNA))	41	2		2						2		2		COVID19 (COVID19 (PFIZER-BIONTECH))	41													HEP B (NO BRAND NAME)	41
COVID19 (COVID19 (JANSSEN))	42													COVID19 (COVID19 (MODERNA))	42													COVID19 (COVID19 (PFIZER-BIONTECH))	42	1		1						1		1		HEP B (NO BRAND NAME)	42
COVID19 (COVID19 (JANSSEN))	43													COVID19 (COVID19 (MODERNA))	43													COVID19 (COVID19 (PFIZER-BIONTECH))	43													HEP B (NO BRAND NAME)	43
COVID19 (COVID19 (JANSSEN))	44													COVID19 (COVID19 (MODERNA))	44													COVID19 (COVID19 (PFIZER-BIONTECH))	44													HEP B (NO BRAND NAME)	44
COVID19 (COVID19 (JANSSEN))	45													COVID19 (COVID19 (MODERNA))	45	1	1							1	1			COVID19 (COVID19 (PFIZER-BIONTECH))	45	2	1	1						2	1	1		HEP B (NO BRAND NAME)	45
COVID19 (COVID19 (JANSSEN))	46													COVID19 (COVID19 (MODERNA))	46	1	1							1	1			COVID19 (COVID19 (PFIZER-BIONTECH))	46													HEP B (NO BRAND NAME)	46
COVID19 (COVID19 (JANSSEN))	47													COVID19 (COVID19 (MODERNA))	47													COVID19 (COVID19 (PFIZER-BIONTECH))	47													HEP B (NO BRAND NAME)	47
COVID19 (COVID19 (JANSSEN))	48													COVID19 (COVID19 (MODERNA))	48													COVID19 (COVID19 (PFIZER-BIONTECH))	48	2	1	1						2	1	1		HEP B (NO BRAND NAME)	48
COVID19 (COVID19 (JANSSEN))	49													COVID19 (COVID19 (MODERNA))	49													COVID19 (COVID19 (PFIZER-BIONTECH))	49													HEP B (NO BRAND NAME)	49
COVID19 (COVID19 (JANSSEN))	50													COVID19 (COVID19 (MODERNA))	50	1	1							1	1			COVID19 (COVID19 (PFIZER-BIONTECH))	50	3	1	2						3	1	2		HEP B (NO BRAND NAME)	50	1			1
COVID19 (COVID19 (JANSSEN))	51													COVID19 (COVID19 (MODERNA))	51													COVID19 (COVID19 (PFIZER-BIONTECH))	51													HEP B (NO BRAND NAME)	51
COVID19 (COVID19 (JANSSEN))	52													COVID19 (COVID19 (MODERNA))	52													COVID19 (COVID19 (PFIZER-BIONTECH))	52	1		1						1		1		HEP B (NO BRAND NAME)	52
COVID19 (COVID19 (JANSSEN))	53													COVID19 (COVID19 (MODERNA))	53													COVID19 (COVID19 (PFIZER-BIONTECH))	53	2	1	1						2	1	1		HEP B (NO BRAND NAME)	53
COVID19 (COVID19 (JANSSEN))	54													COVID19 (COVID19 (MODERNA))	54	1	1							1	1			COVID19 (COVID19 (PFIZER-BIONTECH))	54													HEP B (NO BRAND NAME)	54
COVID19 (COVID19 (JANSSEN))	55													COVID19 (COVID19 (MODERNA))	55													COVID19 (COVID19 (PFIZER-BIONTECH))	55													HEP B (NO BRAND NAME)	55
COVID19 (COVID19 (JANSSEN))	56													COVID19 (COVID19 (MODERNA))	56													COVID19 (COVID19 (PFIZER-BIONTECH))	56													HEP B (NO BRAND NAME)	56
COVID19 (COVID19 (JANSSEN))	57													COVID19 (COVID19 (MODERNA))	57													COVID19 (COVID19 (PFIZER-BIONTECH))	57													HEP B (NO BRAND NAME)	57
COVID19 (COVID19 (JANSSEN))	58													COVID19 (COVID19 (MODERNA))	58													COVID19 (COVID19 (PFIZER-BIONTECH))	58													HEP B (NO BRAND NAME)	58
COVID19 (COVID19 (JANSSEN))	59													COVID19 (COVID19 (MODERNA))	59													COVID19 (COVID19 (PFIZER-BIONTECH))	59													HEP B (NO BRAND NAME)	59
COVID19 (COVID19 (JANSSEN))	60													COVID19 (COVID19 (MODERNA))	60													COVID19 (COVID19 (PFIZER-BIONTECH))	60													HEP B (NO BRAND NAME)	60
COVID19 (COVID19 (JANSSEN))	61													COVID19 (COVID19 (MODERNA))	61													COVID19 (COVID19 (PFIZER-BIONTECH))	61													HEP B (NO BRAND NAME)	61
COVID19 (COVID19 (JANSSEN))	62													COVID19 (COVID19 (MODERNA))	62	1		1						1		1		COVID19 (COVID19 (PFIZER-BIONTECH))	62													HEP B (NO BRAND NAME)	62
COVID19 (COVID19 (JANSSEN))	63													COVID19 (COVID19 (MODERNA))	63													COVID19 (COVID19 (PFIZER-BIONTECH))	63													HEP B (NO BRAND NAME)	63
COVID19 (COVID19 (JANSSEN))	64													COVID19 (COVID19 (MODERNA))	64													COVID19 (COVID19 (PFIZER-BIONTECH))	64													HEP B (NO BRAND NAME)	64
COVID19 (COVID19 (JANSSEN))	65													COVID19 (COVID19 (MODERNA))	65													COVID19 (COVID19 (PFIZER-BIONTECH))	65													HEP B (NO BRAND NAME)	65
COVID19 (COVID19 (JANSSEN))	66													COVID19 (COVID19 (MODERNA))	66													COVID19 (COVID19 (PFIZER-BIONTECH))	66													HEP B (NO BRAND NAME)	66
COVID19 (COVID19 (JANSSEN))	67													COVID19 (COVID19 (MODERNA))	67													COVID19 (COVID19 (PFIZER-BIONTECH))	67													HEP B (NO BRAND NAME)	67
COVID19 (COVID19 (JANSSEN))	68													COVID19 (COVID19 (MODERNA))	68													COVID19 (COVID19 (PFIZER-BIONTECH))	68													HEP B (NO BRAND NAME)	68
COVID19 (COVID19 (JANSSEN))	69													COVID19 (COVID19 (MODERNA))	69													COVID19 (COVID19 (PFIZER-BIONTECH))	69													HEP B (NO BRAND NAME)	69
COVID19 (COVID19 (JANSSEN))	70													COVID19 (COVID19 (MODERNA))	70													COVID19 (COVID19 (PFIZER-BIONTECH))	70													HEP B (NO BRAND NAME)	70
COVID19 (COVID19 (JANSSEN))	71													COVID19 (COVID19 (MODERNA))	71													COVID19 (COVID19 (PFIZER-BIONTECH))	71													HEP B (NO BRAND NAME)	71
COVID19 (COVID19 (JANSSEN))	72													COVID19 (COVID19 (MODERNA))	72													COVID19 (COVID19 (PFIZER-BIONTECH))	72													HEP B (NO BRAND NAME)	72
COVID19 (COVID19 (JANSSEN))	73													COVID19 (COVID19 (MODERNA))	73													COVID19 (COVID19 (PFIZER-BIONTECH))	73													HEP B (NO BRAND NAME)	73
COVID19 (COVID19 (JANSSEN))	74													COVID19 (COVID19 (MODERNA))	74													COVID19 (COVID19 (PFIZER-BIONTECH))	74													HEP B (NO BRAND NAME)	74
COVID19 (COVID19 (JANSSEN))	75													COVID19 (COVID19 (MODERNA))	75													COVID19 (COVID19 (PFIZER-BIONTECH))	75													HEP B (NO BRAND NAME)	75
COVID19 (COVID19 (JANSSEN))	76													COVID19 (COVID19 (MODERNA))	76													COVID19 (COVID19 (PFIZER-BIONTECH))	76													HEP B (NO BRAND NAME)	76
COVID19 (COVID19 (JANSSEN))	77													COVID19 (COVID19 (MODERNA))	77													COVID19 (COVID19 (PFIZER-BIONTECH))	77													HEP B (NO BRAND NAME)	77
COVID19 (COVID19 (JANSSEN))	78													COVID19 (COVID19 (MODERNA))	78													COVID19 (COVID19 (PFIZER-BIONTECH))	78													HEP B (NO BRAND NAME)	78
COVID19 (COVID19 (JANSSEN))	79													COVID19 (COVID19 (MODERNA))	79													COVID19 (COVID19 (PFIZER-BIONTECH))	79													HEP B (NO BRAND NAME)	79
COVID19 (COVID19 (JANSSEN))	80													COVID19 (COVID19 (MODERNA))	80													COVID19 (COVID19 (PFIZER-BIONTECH))	80													HEP B (NO BRAND NAME)	80
COVID19 (COVID19 (JANSSEN))	81													COVID19 (COVID19 (MODERNA))	81													COVID19 (COVID19 (PFIZER-BIONTECH))	81													HEP B (NO BRAND NAME)	81
COVID19 (COVID19 (JANSSEN))	82													COVID19 (COVID19 (MODERNA))	82													COVID19 (COVID19 (PFIZER-BIONTECH))	82													HEP B (NO BRAND NAME)	82
COVID19 (COVID19 (JANSSEN))	83													COVID19 (COVID19 (MODERNA))	83													COVID19 (COVID19 (PFIZER-BIONTECH))	83													HEP B (NO BRAND NAME)	83
COVID19 (COVID19 (JANSSEN))	84													COVID19 (COVID19 (MODERNA))	84													COVID19 (COVID19 (PFIZER-BIONTECH))	84													HEP B (NO BRAND NAME)	84
COVID19 (COVID19 (JANSSEN))	85													COVID19 (COVID19 (MODERNA))	85													COVID19 (COVID19 (PFIZER-BIONTECH))	85													HEP B (NO BRAND NAME)	85
COVID19 (COVID19 (JANSSEN))	86													COVID19 (COVID19 (MODERNA))	86													COVID19 (COVID19 (PFIZER-BIONTECH))	86													HEP B (NO BRAND NAME)	86
COVID19 (COVID19 (JANSSEN))	87													COVID19 (COVID19 (MODERNA))	87													COVID19 (COVID19 (PFIZER-BIONTECH))	87													HEP B (NO BRAND NAME)	87
COVID19 (COVID19 (JANSSEN))	88													COVID19 (COVID19 (MODERNA))	88													COVID19 (COVID19 (PFIZER-BIONTECH))	88													HEP B (NO BRAND NAME)	88
COVID19 (COVID19 (JANSSEN))	89													COVID19 (COVID19 (MODERNA))	89													COVID19 (COVID19 (PFIZER-BIONTECH))	89													HEP B (NO BRAND NAME)	89
COVID19 (COVID19 (JANSSEN))	90													COVID19 (COVID19 (MODERNA))	90													COVID19 (COVID19 (PFIZER-BIONTECH))	90													HEP B (NO BRAND NAME)	90
COVID19 (COVID19 (JANSSEN))	91													COVID19 (COVID19 (MODERNA))	91													COVID19 (COVID19 (PFIZER-BIONTECH))	91													HEP B (NO BRAND NAME)	91
COVID19 (COVID19 (JANSSEN))	92													COVID19 (COVID19 (MODERNA))	92													COVID19 (COVID19 (PFIZER-BIONTECH))	92													HEP B (NO BRAND NAME)	92
COVID19 (COVID19 (JANSSEN))	93													COVID19 (COVID19 (MODERNA))	93													COVID19 (COVID19 (PFIZER-BIONTECH))	93													HEP B (NO BRAND NAME)	93
COVID19 (COVID19 (JANSSEN))	94													COVID19 (COVID19 (MODERNA))	94													COVID19 (COVID19 (PFIZER-BIONTECH))	94													HEP B (NO BRAND NAME)	94
COVID19 (COVID19 (JANSSEN))	95													COVID19 (COVID19 (MODERNA))	95													COVID19 (COVID19 (PFIZER-BIONTECH))	95													HEP B (NO BRAND NAME)	95
COVID19 (COVID19 (JANSSEN))	96													COVID19 (COVID19 (MODERNA))	96													COVID19 (COVID19 (PFIZER-BIONTECH))	96													HEP B (NO BRAND NAME)	96
COVID19 (COVID19 (JANSSEN))	97													COVID19 (COVID19 (MODERNA))	97													COVID19 (COVID19 (PFIZER-BIONTECH))	97													HEP B (NO BRAND NAME)	97
COVID19 (COVID19 (JANSSEN))	98													COVID19 (COVID19 (MODERNA))	98													COVID19 (COVID19 (PFIZER-BIONTECH))	98													HEP B (NO BRAND NAME)	98
COVID19 (COVID19 (JANSSEN))	99													COVID19 (COVID19 (MODERNA))	99													COVID19 (COVID19 (PFIZER-BIONTECH))	99													HEP B (NO BRAND NAME)	99
COVID19 (COVID19 (JANSSEN))	100													COVID19 (COVID19 (MODERNA))	100													COVID19 (COVID19 (PFIZER-BIONTECH))	100													HEP B (NO BRAND NAME)	100
COVID19 (COVID19 (JANSSEN))	101													COVID19 (COVID19 (MODERNA))	101													COVID19 (COVID19 (PFIZER-BIONTECH))	101													HEP B (NO BRAND NAME)	101
COVID19 (COVID19 (JANSSEN))	102													COVID19 (COVID19 (MODERNA))	102													COVID19 (COVID19 (PFIZER-BIONTECH))	102													HEP B (NO BRAND NAME)	102
COVID19 (COVID19 (JANSSEN))	103													COVID19 (COVID19 (MODERNA))	103													COVID19 (COVID19 (PFIZER-BIONTECH))	103													HEP B (NO BRAND NAME)	103
COVID19 (COVID19 (JANSSEN))	104													COVID19 (COVID19 (MODERNA))	104													COVID19 (COVID19 (PFIZER-BIONTECH))	104													HEP B (NO BRAND NAME)	104
COVID19 (COVID19 (JANSSEN))	105													COVID19 (COVID19 (MODERNA))	105													COVID19 (COVID19 (PFIZER-BIONTECH))	105													HEP B (NO BRAND NAME)	105
COVID19 (COVID19 (JANSSEN))	106													COVID19 (COVID19 (MODERNA))	106													COVID19 (COVID19 (PFIZER-BIONTECH))	106													HEP B (NO BRAND NAME)	106
COVID19 (COVID19 (JANSSEN))	107													COVID19 (COVID19 (MODERNA))	107													COVID19 (COVID19 (PFIZER-BIONTECH))	107													HEP B (NO BRAND NAME)	107
COVID19 (COVID19 (JANSSEN))	108													COVID19 (COVID19 (MODERNA))	108													COVID19 (COVID19 (PFIZER-BIONTECH))	108													HEP B (NO BRAND NAME)	108
COVID19 (COVID19 (JANSSEN))	109													COVID19 (COVID19 (MODERNA))	109													COVID19 (COVID19 (PFIZER-BIONTECH))	109													HEP B (NO BRAND NAME)	109
COVID19 (COVID19 (JANSSEN))	110													COVID19 (COVID19 (MODERNA))	110													COVID19 (COVID19 (PFIZER-BIONTECH))	110													HEP B (NO BRAND NAME)	110
COVID19 (COVID19 (JANSSEN))	111													COVID19 (COVID19 (MODERNA))	111													COVID19 (COVID19 (PFIZER-BIONTECH))	111													HEP B (NO BRAND NAME)	111
COVID19 (COVID19 (JANSSEN))	112													COVID19 (COVID19 (MODERNA))	112													COVID19 (COVID19 (PFIZER-BIONTECH))	112													HEP B (NO BRAND NAME)	112
COVID19 (COVID19 (JANSSEN))	113													COVID19 (COVID19 (MODERNA))	113													COVID19 (COVID19 (PFIZER-BIONTECH))	113													HEP B (NO BRAND NAME)	113
COVID19 (COVID19 (JANSSEN))	114													COVID19 (COVID19 (MODERNA))	114													COVID19 (COVID19 (PFIZER-BIONTECH))	114													HEP B (NO BRAND NAME)	114
COVID19 (COVID19 (JANSSEN))	115													COVID19 (COVID19 (MODERNA))	115													COVID19 (COVID19 (PFIZER-BIONTECH))	115													HEP B (NO BRAND NAME)	115
COVID19 (COVID19 (JANSSEN))	116													COVID19 (COVID19 (MODERNA))	116													COVID19 (COVID19 (PFIZER-BIONTECH))	116													HEP B (NO BRAND NAME)	116
COVID19 (COVID19 (JANSSEN))	117													COVID19 (COVID19 (MODERNA))	117													COVID19 (COVID19 (PFIZER-BIONTECH))	117													HEP B (NO BRAND NAME)	117
COVID19 (COVID19 (JANSSEN))	118													COVID19 (COVID19 (MODERNA))	118													COVID19 (COVID19 (PFIZER-BIONTECH))	118													HEP B (NO BRAND NAME)	118
COVID19 (COVID19 (JANSSEN))	119													COVID19 (COVID19 (MODERNA))	119													COVID19 (COVID19 (PFIZER-BIONTECH))	119													HEP B (NO BRAND NAME)	119
COVID19 (COVID19 (JANSSEN))	120													COVID19 (COVID19 (MODERNA))	120													COVID19 (COVID19 (PFIZER-BIONTECH))	120													HEP B (NO BRAND NAME)	120
Onset report
COVID19 (COVID19 (JANSSEN))	Onset	All	1	2	3	All Male	1 Male	2 Male	3 Male	All Female	1 Female	2 Female	3 Female	COVID19 (COVID19 (MODERNA))	Onset	All	1	2	3	All Male	1 Male	2 Male	3 Male	All Female	1 Female	2 Female	3 Female	COVID19 (COVID19 (PFIZER-BIONTECH))	Onset	All	1	2	3	All Male	1 Male	2 Male	3 Male	All Female	1 Female	2 Female	3 Female	HEP B (NO BRAND NAME)	Onset	All	1	2	3	All Male	1 Male
COVID19 (COVID19 (JANSSEN))	0													COVID19 (COVID19 (MODERNA))	0	8	5	3						8	5	3		COVID19 (COVID19 (PFIZER-BIONTECH))	0	22	7	14						22	7	14		HEP B (NO BRAND NAME)	0
COVID19 (COVID19 (JANSSEN))	1													COVID19 (COVID19 (MODERNA))	1	2	1	1						2	1	1		COVID19 (COVID19 (PFIZER-BIONTECH))	1	6	2	4						6	2	4		HEP B (NO BRAND NAME)	1
COVID19 (COVID19 (JANSSEN))	2													COVID19 (COVID19 (MODERNA))	2													COVID19 (COVID19 (PFIZER-BIONTECH))	2	5	2	1						5	2	1		HEP B (NO BRAND NAME)	2
COVID19 (COVID19 (JANSSEN))	3	1								1				COVID19 (COVID19 (MODERNA))	3													COVID19 (COVID19 (PFIZER-BIONTECH))	3	2	2							2	2			HEP B (NO BRAND NAME)	3
COVID19 (COVID19 (JANSSEN))	4													COVID19 (COVID19 (MODERNA))	4													COVID19 (COVID19 (PFIZER-BIONTECH))	4	1								1				HEP B (NO BRAND NAME)	4
COVID19 (COVID19 (JANSSEN))	5													COVID19 (COVID19 (MODERNA))	5													COVID19 (COVID19 (PFIZER-BIONTECH))	5	2	2							2	2			HEP B (NO BRAND NAME)	5
COVID19 (COVID19 (JANSSEN))	6													COVID19 (COVID19 (MODERNA))	6	2	1	1						2	1	1		COVID19 (COVID19 (PFIZER-BIONTECH))	6	4	3							4	3			HEP B (NO BRAND NAME)	6
COVID19 (COVID19 (JANSSEN))	7													COVID19 (COVID19 (MODERNA))	7	2	1	1						2	1	1		COVID19 (COVID19 (PFIZER-BIONTECH))	7	3	2	1						3	2	1		HEP B (NO BRAND NAME)	7
COVID19 (COVID19 (JANSSEN))	8													COVID19 (COVID19 (MODERNA))	8													COVID19 (COVID19 (PFIZER-BIONTECH))	8	1		1						1		1		HEP B (NO BRAND NAME)	8
COVID19 (COVID19 (JANSSEN))	9													COVID19 (COVID19 (MODERNA))	9	1	1							1	1			COVID19 (COVID19 (PFIZER-BIONTECH))	9													HEP B (NO BRAND NAME)	9
COVID19 (COVID19 (JANSSEN))	10													COVID19 (COVID19 (MODERNA))	10													COVID19 (COVID19 (PFIZER-BIONTECH))	10													HEP B (NO BRAND NAME)	10
COVID19 (COVID19 (JANSSEN))	11													COVID19 (COVID19 (MODERNA))	11													COVID19 (COVID19 (PFIZER-BIONTECH))	11	2	1	1						2	1	1		HEP B (NO BRAND NAME)	11
COVID19 (COVID19 (JANSSEN))	12													COVID19 (COVID19 (MODERNA))	12													COVID19 (COVID19 (PFIZER-BIONTECH))	12													HEP B (NO BRAND NAME)	12
COVID19 (COVID19 (JANSSEN))	13													COVID19 (COVID19 (MODERNA))	13													COVID19 (COVID19 (PFIZER-BIONTECH))	13	1		1						1		1		HEP B (NO BRAND NAME)	13
COVID19 (COVID19 (JANSSEN))	14													COVID19 (COVID19 (MODERNA))	14													COVID19 (COVID19 (PFIZER-BIONTECH))	14	2	2							2	2			HEP B (NO BRAND NAME)	14
COVID19 (COVID19 (JANSSEN))	15													COVID19 (COVID19 (MODERNA))	15													COVID19 (COVID19 (PFIZER-BIONTECH))	15	1	1							1	1			HEP B (NO BRAND NAME)	15
COVID19 (COVID19 (JANSSEN))	16													COVID19 (COVID19 (MODERNA))	16	1		1						1		1		COVID19 (COVID19 (PFIZER-BIONTECH))	16	1								1				HEP B (NO BRAND NAME)	16
COVID19 (COVID19 (JANSSEN))	17													COVID19 (COVID19 (MODERNA))	17													COVID19 (COVID19 (PFIZER-BIONTECH))	17													HEP B (NO BRAND NAME)	17
COVID19 (COVID19 (JANSSEN))	18													COVID19 (COVID19 (MODERNA))	18													COVID19 (COVID19 (PFIZER-BIONTECH))	18	1	1							1	1			HEP B (NO BRAND NAME)	18
COVID19 (COVID19 (JANSSEN))	19													COVID19 (COVID19 (MODERNA))	19													COVID19 (COVID19 (PFIZER-BIONTECH))	19													HEP B (NO BRAND NAME)	19
COVID19 (COVID19 (JANSSEN))	20													COVID19 (COVID19 (MODERNA))	20													COVID19 (COVID19 (PFIZER-BIONTECH))	20	1	1							1	1			HEP B (NO BRAND NAME)	20
COVID19 (COVID19 (JANSSEN))	21													COVID19 (COVID19 (MODERNA))	21													COVID19 (COVID19 (PFIZER-BIONTECH))	21	1	1							1	1			HEP B (NO BRAND NAME)	21
COVID19 (COVID19 (JANSSEN))	22													COVID19 (COVID19 (MODERNA))	22													COVID19 (COVID19 (PFIZER-BIONTECH))	22	1	1							1	1			HEP B (NO BRAND NAME)	22
COVID19 (COVID19 (JANSSEN))	23													COVID19 (COVID19 (MODERNA))	23													COVID19 (COVID19 (PFIZER-BIONTECH))	23													HEP B (NO BRAND NAME)	23
COVID19 (COVID19 (JANSSEN))	24													COVID19 (COVID19 (MODERNA))	24	1								1				COVID19 (COVID19 (PFIZER-BIONTECH))	24													HEP B (NO BRAND NAME)	24
COVID19 (COVID19 (JANSSEN))	25													COVID19 (COVID19 (MODERNA))	25													COVID19 (COVID19 (PFIZER-BIONTECH))	25													HEP B (NO BRAND NAME)	25
COVID19 (COVID19 (JANSSEN))	26													COVID19 (COVID19 (MODERNA))	26													COVID19 (COVID19 (PFIZER-BIONTECH))	26													HEP B (NO BRAND NAME)	26
COVID19 (COVID19 (JANSSEN))	27													COVID19 (COVID19 (MODERNA))	27													COVID19 (COVID19 (PFIZER-BIONTECH))	27													HEP B (NO BRAND NAME)	27
COVID19 (COVID19 (JANSSEN))	28													COVID19 (COVID19 (MODERNA))	28	2	1	1						2	1	1		COVID19 (COVID19 (PFIZER-BIONTECH))	28													HEP B (NO BRAND NAME)	28
COVID19 (COVID19 (JANSSEN))	29													COVID19 (COVID19 (MODERNA))	29													COVID19 (COVID19 (PFIZER-BIONTECH))	29													HEP B (NO BRAND NAME)	29
COVID19 (COVID19 (JANSSEN))	30													COVID19 (COVID19 (MODERNA))	30													COVID19 (COVID19 (PFIZER-BIONTECH))	30	1								1				HEP B (NO BRAND NAME)	30
COVID19 (COVID19 (JANSSEN))	31													COVID19 (COVID19 (MODERNA))	31													COVID19 (COVID19 (PFIZER-BIONTECH))	31	1		1						1		1		HEP B (NO BRAND NAME)	31
COVID19 (COVID19 (JANSSEN))	32													COVID19 (COVID19 (MODERNA))	32													COVID19 (COVID19 (PFIZER-BIONTECH))	32	1								1				HEP B (NO BRAND NAME)	32
COVID19 (COVID19 (JANSSEN))	33													COVID19 (COVID19 (MODERNA))	33													COVID19 (COVID19 (PFIZER-BIONTECH))	33													HEP B (NO BRAND NAME)	33
COVID19 (COVID19 (JANSSEN))	34													COVID19 (COVID19 (MODERNA))	34													COVID19 (COVID19 (PFIZER-BIONTECH))	34													HEP B (NO BRAND NAME)	34
COVID19 (COVID19 (JANSSEN))	35													COVID19 (COVID19 (MODERNA))	35													COVID19 (COVID19 (PFIZER-BIONTECH))	35													HEP B (NO BRAND NAME)	35
COVID19 (COVID19 (JANSSEN))	36													COVID19 (COVID19 (MODERNA))	36													COVID19 (COVID19 (PFIZER-BIONTECH))	36													HEP B (NO BRAND NAME)	36
COVID19 (COVID19 (JANSSEN))	37													COVID19 (COVID19 (MODERNA))	37													COVID19 (COVID19 (PFIZER-BIONTECH))	37													HEP B (NO BRAND NAME)	37
COVID19 (COVID19 (JANSSEN))	38													COVID19 (COVID19 (MODERNA))	38													COVID19 (COVID19 (PFIZER-BIONTECH))	38													HEP B (NO BRAND NAME)	38
COVID19 (COVID19 (JANSSEN))	39													COVID19 (COVID19 (MODERNA))	39													COVID19 (COVID19 (PFIZER-BIONTECH))	39													HEP B (NO BRAND NAME)	39
COVID19 (COVID19 (JANSSEN))	40													COVID19 (COVID19 (MODERNA))	40													COVID19 (COVID19 (PFIZER-BIONTECH))	40													HEP B (NO BRAND NAME)	40
COVID19 (COVID19 (JANSSEN))	41													COVID19 (COVID19 (MODERNA))	41													COVID19 (COVID19 (PFIZER-BIONTECH))	41													HEP B (NO BRAND NAME)	41
COVID19 (COVID19 (JANSSEN))	42													COVID19 (COVID19 (MODERNA))	42													COVID19 (COVID19 (PFIZER-BIONTECH))	42													HEP B (NO BRAND NAME)	42
COVID19 (COVID19 (JANSSEN))	43													COVID19 (COVID19 (MODERNA))	43													COVID19 (COVID19 (PFIZER-BIONTECH))	43													HEP B (NO BRAND NAME)	43
COVID19 (COVID19 (JANSSEN))	44													COVID19 (COVID19 (MODERNA))	44													COVID19 (COVID19 (PFIZER-BIONTECH))	44													HEP B (NO BRAND NAME)	44
COVID19 (COVID19 (JANSSEN))	45													COVID19 (COVID19 (MODERNA))	45													COVID19 (COVID19 (PFIZER-BIONTECH))	45													HEP B (NO BRAND NAME)	45
COVID19 (COVID19 (JANSSEN))	46													COVID19 (COVID19 (MODERNA))	46													COVID19 (COVID19 (PFIZER-BIONTECH))	46													HEP B (NO BRAND NAME)	46
COVID19 (COVID19 (JANSSEN))	47													COVID19 (COVID19 (MODERNA))	47													COVID19 (COVID19 (PFIZER-BIONTECH))	47													HEP B (NO BRAND NAME)	47
COVID19 (COVID19 (JANSSEN))	48													COVID19 (COVID19 (MODERNA))	48	1		1						1		1		COVID19 (COVID19 (PFIZER-BIONTECH))	48													HEP B (NO BRAND NAME)	48
COVID19 (COVID19 (JANSSEN))	49													COVID19 (COVID19 (MODERNA))	49													COVID19 (COVID19 (PFIZER-BIONTECH))	49													HEP B (NO BRAND NAME)	49
COVID19 (COVID19 (JANSSEN))	50													COVID19 (COVID19 (MODERNA))	50													COVID19 (COVID19 (PFIZER-BIONTECH))	50													HEP B (NO BRAND NAME)	50
COVID19 (COVID19 (JANSSEN))	51													COVID19 (COVID19 (MODERNA))	51													COVID19 (COVID19 (PFIZER-BIONTECH))	51													HEP B (NO BRAND NAME)	51
COVID19 (COVID19 (JANSSEN))	52													COVID19 (COVID19 (MODERNA))	52													COVID19 (COVID19 (PFIZER-BIONTECH))	52													HEP B (NO BRAND NAME)	52
COVID19 (COVID19 (JANSSEN))	53													COVID19 (COVID19 (MODERNA))	53													COVID19 (COVID19 (PFIZER-BIONTECH))	53													HEP B (NO BRAND NAME)	53
COVID19 (COVID19 (JANSSEN))	54													COVID19 (COVID19 (MODERNA))	54													COVID19 (COVID19 (PFIZER-BIONTECH))	54													HEP B (NO BRAND NAME)	54
COVID19 (COVID19 (JANSSEN))	55													COVID19 (COVID19 (MODERNA))	55													COVID19 (COVID19 (PFIZER-BIONTECH))	55													HEP B (NO BRAND NAME)	55
COVID19 (COVID19 (JANSSEN))	56													COVID19 (COVID19 (MODERNA))	56													COVID19 (COVID19 (PFIZER-BIONTECH))	56													HEP B (NO BRAND NAME)	56
COVID19 (COVID19 (JANSSEN))	57													COVID19 (COVID19 (MODERNA))	57													COVID19 (COVID19 (PFIZER-BIONTECH))	57													HEP B (NO BRAND NAME)	57
COVID19 (COVID19 (JANSSEN))	58													COVID19 (COVID19 (MODERNA))	58													COVID19 (COVID19 (PFIZER-BIONTECH))	58													HEP B (NO BRAND NAME)	58
COVID19 (COVID19 (JANSSEN))	59													COVID19 (COVID19 (MODERNA))	59													COVID19 (COVID19 (PFIZER-BIONTECH))	59													HEP B (NO BRAND NAME)	59
COVID19 (COVID19 (JANSSEN))	60													COVID19 (COVID19 (MODERNA))	60													COVID19 (COVID19 (PFIZER-BIONTECH))	60													HEP B (NO BRAND NAME)	60
COVID19 (COVID19 (JANSSEN))	61													COVID19 (COVID19 (MODERNA))	61													COVID19 (COVID19 (PFIZER-BIONTECH))	61													HEP B (NO BRAND NAME)	61
COVID19 (COVID19 (JANSSEN))	62													COVID19 (COVID19 (MODERNA))	62													COVID19 (COVID19 (PFIZER-BIONTECH))	62													HEP B (NO BRAND NAME)	62
COVID19 (COVID19 (JANSSEN))	63													COVID19 (COVID19 (MODERNA))	63	1	1							1	1			COVID19 (COVID19 (PFIZER-BIONTECH))	63													HEP B (NO BRAND NAME)	63
COVID19 (COVID19 (JANSSEN))	64													COVID19 (COVID19 (MODERNA))	64													COVID19 (COVID19 (PFIZER-BIONTECH))	64													HEP B (NO BRAND NAME)	64
COVID19 (COVID19 (JANSSEN))	65													COVID19 (COVID19 (MODERNA))	65													COVID19 (COVID19 (PFIZER-BIONTECH))	65													HEP B (NO BRAND NAME)	65
COVID19 (COVID19 (JANSSEN))	66													COVID19 (COVID19 (MODERNA))	66													COVID19 (COVID19 (PFIZER-BIONTECH))	66													HEP B (NO BRAND NAME)	66
COVID19 (COVID19 (JANSSEN))	67													COVID19 (COVID19 (MODERNA))	67													COVID19 (COVID19 (PFIZER-BIONTECH))	67													HEP B (NO BRAND NAME)	67
COVID19 (COVID19 (JANSSEN))	68													COVID19 (COVID19 (MODERNA))	68													COVID19 (COVID19 (PFIZER-BIONTECH))	68													HEP B (NO BRAND NAME)	68
COVID19 (COVID19 (JANSSEN))	69													COVID19 (COVID19 (MODERNA))	69													COVID19 (COVID19 (PFIZER-BIONTECH))	69													HEP B (NO BRAND NAME)	69
COVID19 (COVID19 (JANSSEN))	70													COVID19 (COVID19 (MODERNA))	70													COVID19 (COVID19 (PFIZER-BIONTECH))	70													HEP B (NO BRAND NAME)	70
COVID19 (COVID19 (JANSSEN))	71													COVID19 (COVID19 (MODERNA))	71													COVID19 (COVID19 (PFIZER-BIONTECH))	71													HEP B (NO BRAND NAME)	71
COVID19 (COVID19 (JANSSEN))	72													COVID19 (COVID19 (MODERNA))	72													COVID19 (COVID19 (PFIZER-BIONTECH))	72													HEP B (NO BRAND NAME)	72
COVID19 (COVID19 (JANSSEN))	73													COVID19 (COVID19 (MODERNA))	73													COVID19 (COVID19 (PFIZER-BIONTECH))	73													HEP B (NO BRAND NAME)	73
COVID19 (COVID19 (JANSSEN))	74													COVID19 (COVID19 (MODERNA))	74													COVID19 (COVID19 (PFIZER-BIONTECH))	74													HEP B (NO BRAND NAME)	74
COVID19 (COVID19 (JANSSEN))	75													COVID19 (COVID19 (MODERNA))	75													COVID19 (COVID19 (PFIZER-BIONTECH))	75													HEP B (NO BRAND NAME)	75
COVID19 (COVID19 (JANSSEN))	76													COVID19 (COVID19 (MODERNA))	76													COVID19 (COVID19 (PFIZER-BIONTECH))	76													HEP B (NO BRAND NAME)	76
COVID19 (COVID19 (JANSSEN))	77													COVID19 (COVID19 (MODERNA))	77													COVID19 (COVID19 (PFIZER-BIONTECH))	77													HEP B (NO BRAND NAME)	77
COVID19 (COVID19 (JANSSEN))	78													COVID19 (COVID19 (MODERNA))	78													COVID19 (COVID19 (PFIZER-BIONTECH))	78													HEP B (NO BRAND NAME)	78
COVID19 (COVID19 (JANSSEN))	79													COVID19 (COVID19 (MODERNA))	79													COVID19 (COVID19 (PFIZER-BIONTECH))	79													HEP B (NO BRAND NAME)	79
COVID19 (COVID19 (JANSSEN))	80													COVID19 (COVID19 (MODERNA))	80													COVID19 (COVID19 (PFIZER-BIONTECH))	80													HEP B (NO BRAND NAME)	80
COVID19 (COVID19 (JANSSEN))	81													COVID19 (COVID19 (MODERNA))	81													COVID19 (COVID19 (PFIZER-BIONTECH))	81													HEP B (NO BRAND NAME)	81
COVID19 (COVID19 (JANSSEN))	82													COVID19 (COVID19 (MODERNA))	82													COVID19 (COVID19 (PFIZER-BIONTECH))	82													HEP B (NO BRAND NAME)	82
COVID19 (COVID19 (JANSSEN))	83													COVID19 (COVID19 (MODERNA))	83													COVID19 (COVID19 (PFIZER-BIONTECH))	83													HEP B (NO BRAND NAME)	83
COVID19 (COVID19 (JANSSEN))	84													COVID19 (COVID19 (MODERNA))	84													COVID19 (COVID19 (PFIZER-BIONTECH))	84													HEP B (NO BRAND NAME)	84
COVID19 (COVID19 (JANSSEN))	85													COVID19 (COVID19 (MODERNA))	85													COVID19 (COVID19 (PFIZER-BIONTECH))	85													HEP B (NO BRAND NAME)	85
COVID19 (COVID19 (JANSSEN))	86													COVID19 (COVID19 (MODERNA))	86													COVID19 (COVID19 (PFIZER-BIONTECH))	86													HEP B (NO BRAND NAME)	86
COVID19 (COVID19 (JANSSEN))	87													COVID19 (COVID19 (MODERNA))	87													COVID19 (COVID19 (PFIZER-BIONTECH))	87													HEP B (NO BRAND NAME)	87
COVID19 (COVID19 (JANSSEN))	88													COVID19 (COVID19 (MODERNA))	88													COVID19 (COVID19 (PFIZER-BIONTECH))	88													HEP B (NO BRAND NAME)	88
COVID19 (COVID19 (JANSSEN))	89													COVID19 (COVID19 (MODERNA))	89													COVID19 (COVID19 (PFIZER-BIONTECH))	89													HEP B (NO BRAND NAME)	89
COVID19 (COVID19 (JANSSEN))	90													COVID19 (COVID19 (MODERNA))	90													COVID19 (COVID19 (PFIZER-BIONTECH))	90													HEP B (NO BRAND NAME)	90
COVID19 (COVID19 (JANSSEN))	91													COVID19 (COVID19 (MODERNA))	91													COVID19 (COVID19 (PFIZER-BIONTECH))	91													HEP B (NO BRAND NAME)	91
COVID19 (COVID19 (JANSSEN))	92													COVID19 (COVID19 (MODERNA))	92													COVID19 (COVID19 (PFIZER-BIONTECH))	92													HEP B (NO BRAND NAME)	92
COVID19 (COVID19 (JANSSEN))	93													COVID19 (COVID19 (MODERNA))	93													COVID19 (COVID19 (PFIZER-BIONTECH))	93													HEP B (NO BRAND NAME)	93
COVID19 (COVID19 (JANSSEN))	94													COVID19 (COVID19 (MODERNA))	94													COVID19 (COVID19 (PFIZER-BIONTECH))	94													HEP B (NO BRAND NAME)	94
COVID19 (COVID19 (JANSSEN))	95													COVID19 (COVID19 (MODERNA))	95													COVID19 (COVID19 (PFIZER-BIONTECH))	95													HEP B (NO BRAND NAME)	95
COVID19 (COVID19 (JANSSEN))	96													COVID19 (COVID19 (MODERNA))	96													COVID19 (COVID19 (PFIZER-BIONTECH))	96													HEP B (NO BRAND NAME)	96
COVID19 (COVID19 (JANSSEN))	97													COVID19 (COVID19 (MODERNA))	97													COVID19 (COVID19 (PFIZER-BIONTECH))	97													HEP B (NO BRAND NAME)	97
COVID19 (COVID19 (JANSSEN))	98													COVID19 (COVID19 (MODERNA))	98													COVID19 (COVID19 (PFIZER-BIONTECH))	98													HEP B (NO BRAND NAME)	98
COVID19 (COVID19 (JANSSEN))	99													COVID19 (COVID19 (MODERNA))	99													COVID19 (COVID19 (PFIZER-BIONTECH))	99													HEP B (NO BRAND NAME)	99
COVID19 (COVID19 (JANSSEN))	100													COVID19 (COVID19 (MODERNA))	100													COVID19 (COVID19 (PFIZER-BIONTECH))	100													HEP B (NO BRAND NAME)	100
COVID19 (COVID19 (JANSSEN))	101													COVID19 (COVID19 (MODERNA))	101													COVID19 (COVID19 (PFIZER-BIONTECH))	101													HEP B (NO BRAND NAME)	101
COVID19 (COVID19 (JANSSEN))	102													COVID19 (COVID19 (MODERNA))	102													COVID19 (COVID19 (PFIZER-BIONTECH))	102													HEP B (NO BRAND NAME)	102
COVID19 (COVID19 (JANSSEN))	103													COVID19 (COVID19 (MODERNA))	103													COVID19 (COVID19 (PFIZER-BIONTECH))	103													HEP B (NO BRAND NAME)	103
COVID19 (COVID19 (JANSSEN))	104													COVID19 (COVID19 (MODERNA))	104													COVID19 (COVID19 (PFIZER-BIONTECH))	104													HEP B (NO BRAND NAME)	104
COVID19 (COVID19 (JANSSEN))	105													COVID19 (COVID19 (MODERNA))	105													COVID19 (COVID19 (PFIZER-BIONTECH))	105													HEP B (NO BRAND NAME)	105
COVID19 (COVID19 (JANSSEN))	106													COVID19 (COVID19 (MODERNA))	106													COVID19 (COVID19 (PFIZER-BIONTECH))	106													HEP B (NO BRAND NAME)	106
COVID19 (COVID19 (JANSSEN))	107													COVID19 (COVID19 (MODERNA))	107													COVID19 (COVID19 (PFIZER-BIONTECH))	107													HEP B (NO BRAND NAME)	107
COVID19 (COVID19 (JANSSEN))	108													COVID19 (COVID19 (MODERNA))	108													COVID19 (COVID19 (PFIZER-BIONTECH))	108													HEP B (NO BRAND NAME)	108
COVID19 (COVID19 (JANSSEN))	109													COVID19 (COVID19 (MODERNA))	109													COVID19 (COVID19 (PFIZER-BIONTECH))	109													HEP B (NO BRAND NAME)	109
COVID19 (COVID19 (JANSSEN))	110													COVID19 (COVID19 (MODERNA))	110													COVID19 (COVID19 (PFIZER-BIONTECH))	110													HEP B (NO BRAND NAME)	110
COVID19 (COVID19 (JANSSEN))	111													COVID19 (COVID19 (MODERNA))	111													COVID19 (COVID19 (PFIZER-BIONTECH))	111													HEP B (NO BRAND NAME)	111
COVID19 (COVID19 (JANSSEN))	112													COVID19 (COVID19 (MODERNA))	112													COVID19 (COVID19 (PFIZER-BIONTECH))	112													HEP B (NO BRAND NAME)	112
COVID19 (COVID19 (JANSSEN))	113													COVID19 (COVID19 (MODERNA))	113													COVID19 (COVID19 (PFIZER-BIONTECH))	113													HEP B (NO BRAND NAME)	113
COVID19 (COVID19 (JANSSEN))	114													COVID19 (COVID19 (MODERNA))	114													COVID19 (COVID19 (PFIZER-BIONTECH))	114													HEP B (NO BRAND NAME)	114
COVID19 (COVID19 (JANSSEN))	115													COVID19 (COVID19 (MODERNA))	115													COVID19 (COVID19 (PFIZER-BIONTECH))	115													HEP B (NO BRAND NAME)	115
COVID19 (COVID19 (JANSSEN))	116													COVID19 (COVID19 (MODERNA))	116													COVID19 (COVID19 (PFIZER-BIONTECH))	116													HEP B (NO BRAND NAME)	116
COVID19 (COVID19 (JANSSEN))	117													COVID19 (COVID19 (MODERNA))	117													COVID19 (COVID19 (PFIZER-BIONTECH))	117													HEP B (NO BRAND NAME)	117
COVID19 (COVID19 (JANSSEN))	118													COVID19 (COVID19 (MODERNA))	118													COVID19 (COVID19 (PFIZER-BIONTECH))	118													HEP B (NO BRAND NAME)	118
COVID19 (COVID19 (JANSSEN))	119													COVID19 (COVID19 (MODERNA))	119													COVID19 (COVID19 (PFIZER-BIONTECH))	119													HEP B (NO BRAND NAME)	119
COVID19 (COVID19 (JANSSEN))	120													COVID19 (COVID19 (MODERNA))	120													COVID19 (COVID19 (PFIZER-BIONTECH))	120													HEP B (NO BRAND NAME)	120
[truncated: 62 more columns]

## Sheet: All_menstrual_disorder
Dose report
Vaccine	All	1	2	3	4	5	6	7+	UNK	N/A
COVID19 (COVID19 (PFIZER-BIONTECH))	2982	1484	1154	30					314
COVID19 (COVID19 (MODERNA))	990	484	360	8					138
COVID19 (COVID19 (JANSSEN))	241	149	1						83	8
HPV (GARDASIL)	185	70	34	39					42
HPV (CERVARIX)	65	25	5	28					7
VACCINE NOT SPECIFIED (NO BRAND NAME)	49	10	9						30
HPV (GARDASIL 9)	18	7	6	3					2
HPV (NO BRAND NAME)	12	3	1	1					7
HEP B (ENGERIX-B)	9	2	3	1					3
HEP B (RECOMBIVAX HB)	7	2	3	1					1
INFLUENZA (SEASONAL) (NO BRAND NAME)	7								7
ANTHRAX (BIOTHRAX)	6	1				1			4
HEP A + HEP B (TWINRIX)	5	2							3
MENINGOCOCCAL CONJUGATE (MENACTRA)	5	3							2
TDAP (BOOSTRIX)	5	1							4
MEASLES + MUMPS + RUBELLA (MMR II)	3	1							2
TETANUS TOXOID (NO BRAND NAME)	3	1							2
TDAP (ADACEL)	3	1							2
HEP A (HAVRIX)	2	2
TYPHOID VI POLYSACCHARIDE (NO BRAND NAME)	2								2
HEP A (VAQTA)	2	1							1
POLIO VIRUS, INACT. (NO BRAND NAME)	2								2
COVID19 (COVID19 (UNKNOWN))	2	1	1
INFLUENZA (SEASONAL) (AFLURIA QUADRIVALENT)	2	2
VACCINE NOT SPECIFIED (FOREIGN)	2	1	1
TYPHOID LIVE ORAL TY21A (VIVOTIF)	1	1
PNEUMO (PNU-IMUNE)	1		1
HEP B (NO BRAND NAME)	1								1
CHOLERA (USP)	1								1
DIPHTHERIA TOXOID + PERTUSSIS + IPV (NO BRAND NAME)	1								1
YELLOW FEVER (NO BRAND NAME)	1								1
HEP A + HEP B (NO BRAND NAME)	1								1
SMALLPOX (NO BRAND NAME)	1								1
TYPHOID VI POLYSACCHARIDE (TYPHIM VI)	1								1
INFLUENZA (SEASONAL) (FLUVIRIN)	1							1
SMALLPOX (DRYVAX)	1								1
VARICELLA (VARIVAX)	1		1
TDAP (NO BRAND NAME)	1								1
VARICELLA (NO BRAND NAME)	1		1
MENINGOCOCCAL CONJUGATE (MENVEO)	1	1
INFLUENZA (SEASONAL) (FLUZONE QUADRIVALENT)	1	1
EBOLA ZAIRE (ERVEBO)	1								1
DTP (NO BRAND NAME)	1								1
MEASLES + MUMPS + RUBELLA (PRIORIX)	1								1
DT ADSORBED (NO BRAND NAME)	1								1
BCG (NO BRAND NAME)	1								1
INFLUENZA (SEASONAL) (FLUCELVAX QUADRIVALENT)	1								1
DTAP + IPV + HIB (INFANRIX QUINTA)	1								1
HEP A (NO BRAND NAME)	1								1
Total	4633
COVID-19	4215
COVID-19 %	0.909778
Age report
ANTHRAX (BIOTHRAX)	Age	All	1	2	3	All Male	1 Male	2 Male	3 Male	All Female	1 Female	2 Female	3 Female	BCG (NO BRAND NAME)	Age	All	1	2	3	All Male	1 Male	2 Male	3 Male	All Female	1 Female	2 Female	3 Female	CHOLERA (USP)	Age	All	1	2	3	All Male	1 Male	2 Male	3 Male	All Female	1 Female	2 Female	3 Female	COVID19 (COVID19 (JANSSEN))	Age	All	1	2	3	All Male	1 Male
ANTHRAX (BIOTHRAX)	0													BCG (NO BRAND NAME)	0													CHOLERA (USP)	0													COVID19 (COVID19 (JANSSEN))	0	37	1
ANTHRAX (BIOTHRAX)	1													BCG (NO BRAND NAME)	1													CHOLERA (USP)	1													COVID19 (COVID19 (JANSSEN))	1
ANTHRAX (BIOTHRAX)	2													BCG (NO BRAND NAME)	2													CHOLERA (USP)	2													COVID19 (COVID19 (JANSSEN))	2
ANTHRAX (BIOTHRAX)	3													BCG (NO BRAND NAME)	3													CHOLERA (USP)	3													COVID19 (COVID19 (JANSSEN))	3
ANTHRAX (BIOTHRAX)	4													BCG (NO BRAND NAME)	4													CHOLERA (USP)	4													COVID19 (COVID19 (JANSSEN))	4
ANTHRAX (BIOTHRAX)	5													BCG (NO BRAND NAME)	5													CHOLERA (USP)	5													COVID19 (COVID19 (JANSSEN))	5
ANTHRAX (BIOTHRAX)	6													BCG (NO BRAND NAME)	6													CHOLERA (USP)	6													COVID19 (COVID19 (JANSSEN))	6
ANTHRAX (BIOTHRAX)	7													BCG (NO BRAND NAME)	7													CHOLERA (USP)	7													COVID19 (COVID19 (JANSSEN))	7
ANTHRAX (BIOTHRAX)	8													BCG (NO BRAND NAME)	8													CHOLERA (USP)	8													COVID19 (COVID19 (JANSSEN))	8
ANTHRAX (BIOTHRAX)	9													BCG (NO BRAND NAME)	9													CHOLERA (USP)	9													COVID19 (COVID19 (JANSSEN))	9
ANTHRAX (BIOTHRAX)	10													BCG (NO BRAND NAME)	10													CHOLERA (USP)	10													COVID19 (COVID19 (JANSSEN))	10
ANTHRAX (BIOTHRAX)	11													BCG (NO BRAND NAME)	11													CHOLERA (USP)	11													COVID19 (COVID19 (JANSSEN))	11
ANTHRAX (BIOTHRAX)	12													BCG (NO BRAND NAME)	12													CHOLERA (USP)	12													COVID19 (COVID19 (JANSSEN))	12
ANTHRAX (BIOTHRAX)	13													BCG (NO BRAND NAME)	13													CHOLERA (USP)	13													COVID19 (COVID19 (JANSSEN))	13
ANTHRAX (BIOTHRAX)	14													BCG (NO BRAND NAME)	14													CHOLERA (USP)	14													COVID19 (COVID19 (JANSSEN))	14
ANTHRAX (BIOTHRAX)	15													BCG (NO BRAND NAME)	15													CHOLERA (USP)	15													COVID19 (COVID19 (JANSSEN))	15
ANTHRAX (BIOTHRAX)	16													BCG (NO BRAND NAME)	16													CHOLERA (USP)	16													COVID19 (COVID19 (JANSSEN))	16
ANTHRAX (BIOTHRAX)	17													BCG (NO BRAND NAME)	17													CHOLERA (USP)	17													COVID19 (COVID19 (JANSSEN))	17
ANTHRAX (BIOTHRAX)	18													BCG (NO BRAND NAME)	18													CHOLERA (USP)	18													COVID19 (COVID19 (JANSSEN))	18	2	2
ANTHRAX (BIOTHRAX)	19													BCG (NO BRAND NAME)	19													CHOLERA (USP)	19													COVID19 (COVID19 (JANSSEN))	19
ANTHRAX (BIOTHRAX)	20													BCG (NO BRAND NAME)	20													CHOLERA (USP)	20													COVID19 (COVID19 (JANSSEN))	20	3	2
ANTHRAX (BIOTHRAX)	21													BCG (NO BRAND NAME)	21													CHOLERA (USP)	21													COVID19 (COVID19 (JANSSEN))	21	3	3
ANTHRAX (BIOTHRAX)	22													BCG (NO BRAND NAME)	22													CHOLERA (USP)	22													COVID19 (COVID19 (JANSSEN))	22	3	3
ANTHRAX (BIOTHRAX)	23													BCG (NO BRAND NAME)	23													CHOLERA (USP)	23													COVID19 (COVID19 (JANSSEN))	23
ANTHRAX (BIOTHRAX)	24													BCG (NO BRAND NAME)	24													CHOLERA (USP)	24													COVID19 (COVID19 (JANSSEN))	24	4	4
ANTHRAX (BIOTHRAX)	25													BCG (NO BRAND NAME)	25													CHOLERA (USP)	25													COVID19 (COVID19 (JANSSEN))	25	2	1
ANTHRAX (BIOTHRAX)	26													BCG (NO BRAND NAME)	26													CHOLERA (USP)	26													COVID19 (COVID19 (JANSSEN))	26	6	4			1	1
ANTHRAX (BIOTHRAX)	27													BCG (NO BRAND NAME)	27													CHOLERA (USP)	27													COVID19 (COVID19 (JANSSEN))	27	4	4
ANTHRAX (BIOTHRAX)	28	2								2				BCG (NO BRAND NAME)	28													CHOLERA (USP)	28	1								1				COVID19 (COVID19 (JANSSEN))	28	5	5
ANTHRAX (BIOTHRAX)	29													BCG (NO BRAND NAME)	29													CHOLERA (USP)	29													COVID19 (COVID19 (JANSSEN))	29	5	4
ANTHRAX (BIOTHRAX)	30													BCG (NO BRAND NAME)	30													CHOLERA (USP)	30													COVID19 (COVID19 (JANSSEN))	30	7	5
ANTHRAX (BIOTHRAX)	31													BCG (NO BRAND NAME)	31													CHOLERA (USP)	31													COVID19 (COVID19 (JANSSEN))	31	6	4
ANTHRAX (BIOTHRAX)	32	1								1				BCG (NO BRAND NAME)	32													CHOLERA (USP)	32													COVID19 (COVID19 (JANSSEN))	32	11	4
ANTHRAX (BIOTHRAX)	33													BCG (NO BRAND NAME)	33													CHOLERA (USP)	33													COVID19 (COVID19 (JANSSEN))	33	5	4
ANTHRAX (BIOTHRAX)	34	2	1							2	1			BCG (NO BRAND NAME)	34													CHOLERA (USP)	34													COVID19 (COVID19 (JANSSEN))	34	7	5
ANTHRAX (BIOTHRAX)	35													BCG (NO BRAND NAME)	35													CHOLERA (USP)	35													COVID19 (COVID19 (JANSSEN))	35	3	2
ANTHRAX (BIOTHRAX)	36													BCG (NO BRAND NAME)	36													CHOLERA (USP)	36													COVID19 (COVID19 (JANSSEN))	36	11	6
ANTHRAX (BIOTHRAX)	37	1								1				BCG (NO BRAND NAME)	37													CHOLERA (USP)	37													COVID19 (COVID19 (JANSSEN))	37	4	4
ANTHRAX (BIOTHRAX)	38													BCG (NO BRAND NAME)	38													CHOLERA (USP)	38													COVID19 (COVID19 (JANSSEN))	38	12	9
ANTHRAX (BIOTHRAX)	39													BCG (NO BRAND NAME)	39													CHOLERA (USP)	39													COVID19 (COVID19 (JANSSEN))	39	3	2
ANTHRAX (BIOTHRAX)	40													BCG (NO BRAND NAME)	40													CHOLERA (USP)	40													COVID19 (COVID19 (JANSSEN))	40	8	5
ANTHRAX (BIOTHRAX)	41													BCG (NO BRAND NAME)	41													CHOLERA (USP)	41													COVID19 (COVID19 (JANSSEN))	41	9	6
ANTHRAX (BIOTHRAX)	42													BCG (NO BRAND NAME)	42													CHOLERA (USP)	42													COVID19 (COVID19 (JANSSEN))	42	7	4
ANTHRAX (BIOTHRAX)	43													BCG (NO BRAND NAME)	43													CHOLERA (USP)	43													COVID19 (COVID19 (JANSSEN))	43	9	7
ANTHRAX (BIOTHRAX)	44													BCG (NO BRAND NAME)	44	1								1				CHOLERA (USP)	44													COVID19 (COVID19 (JANSSEN))	44	8	6
ANTHRAX (BIOTHRAX)	45													BCG (NO BRAND NAME)	45													CHOLERA (USP)	45													COVID19 (COVID19 (JANSSEN))	45	7	7
ANTHRAX (BIOTHRAX)	46													BCG (NO BRAND NAME)	46													CHOLERA (USP)	46													COVID19 (COVID19 (JANSSEN))	46	8	6
ANTHRAX (BIOTHRAX)	47													BCG (NO BRAND NAME)	47													CHOLERA (USP)	47													COVID19 (COVID19 (JANSSEN))	47	4	2
ANTHRAX (BIOTHRAX)	48													BCG (NO BRAND NAME)	48													CHOLERA (USP)	48													COVID19 (COVID19 (JANSSEN))	48	6	3
ANTHRAX (BIOTHRAX)	49													BCG (NO BRAND NAME)	49													CHOLERA (USP)	49													COVID19 (COVID19 (JANSSEN))	49	7	5
ANTHRAX (BIOTHRAX)	50													BCG (NO BRAND NAME)	50													CHOLERA (USP)	50													COVID19 (COVID19 (JANSSEN))	50	7	6
ANTHRAX (BIOTHRAX)	51													BCG (NO BRAND NAME)	51													CHOLERA (USP)	51													COVID19 (COVID19 (JANSSEN))	51	5	4
ANTHRAX (BIOTHRAX)	52													BCG (NO BRAND NAME)	52													CHOLERA (USP)	52													COVID19 (COVID19 (JANSSEN))	52	4	3
ANTHRAX (BIOTHRAX)	53													BCG (NO BRAND NAME)	53													CHOLERA (USP)	53													COVID19 (COVID19 (JANSSEN))	53	3	2	1
ANTHRAX (BIOTHRAX)	54													BCG (NO BRAND NAME)	54													CHOLERA (USP)	54													COVID19 (COVID19 (JANSSEN))	54	1	1
ANTHRAX (BIOTHRAX)	55													BCG (NO BRAND NAME)	55													CHOLERA (USP)	55													COVID19 (COVID19 (JANSSEN))	55
ANTHRAX (BIOTHRAX)	56													BCG (NO BRAND NAME)	56													CHOLERA (USP)	56													COVID19 (COVID19 (JANSSEN))	56	3	2
ANTHRAX (BIOTHRAX)	57													BCG (NO BRAND NAME)	57													CHOLERA (USP)	57													COVID19 (COVID19 (JANSSEN))	57	1	1
ANTHRAX (BIOTHRAX)	58													BCG (NO BRAND NAME)	58													CHOLERA (USP)	58													COVID19 (COVID19 (JANSSEN))	58
ANTHRAX (BIOTHRAX)	59													BCG (NO BRAND NAME)	59													CHOLERA (USP)	59													COVID19 (COVID19 (JANSSEN))	59
ANTHRAX (BIOTHRAX)	60													BCG (NO BRAND NAME)	60													CHOLERA (USP)	60													COVID19 (COVID19 (JANSSEN))	60
ANTHRAX (BIOTHRAX)	61													BCG (NO BRAND NAME)	61													CHOLERA (USP)	61													COVID19 (COVID19 (JANSSEN))	61	1	1
ANTHRAX (BIOTHRAX)	62													BCG (NO BRAND NAME)	62													CHOLERA (USP)	62													COVID19 (COVID19 (JANSSEN))	62
ANTHRAX (BIOTHRAX)	63													BCG (NO BRAND NAME)	63													CHOLERA (USP)	63													COVID19 (COVID19 (JANSSEN))	63
ANTHRAX (BIOTHRAX)	64													BCG (NO BRAND NAME)	64													CHOLERA (USP)	64													COVID19 (COVID19 (JANSSEN))	64
ANTHRAX (BIOTHRAX)	65													BCG (NO BRAND NAME)	65													CHOLERA (USP)	65													COVID19 (COVID19 (JANSSEN))	65
ANTHRAX (BIOTHRAX)	66													BCG (NO BRAND NAME)	66													CHOLERA (USP)	66													COVID19 (COVID19 (JANSSEN))	66
ANTHRAX (BIOTHRAX)	67													BCG (NO BRAND NAME)	67													CHOLERA (USP)	67													COVID19 (COVID19 (JANSSEN))	67
ANTHRAX (BIOTHRAX)	68													BCG (NO BRAND NAME)	68													CHOLERA (USP)	68													COVID19 (COVID19 (JANSSEN))	68
ANTHRAX (BIOTHRAX)	69													BCG (NO BRAND NAME)	69													CHOLERA (USP)	69													COVID19 (COVID19 (JANSSEN))	69
ANTHRAX (BIOTHRAX)	70													BCG (NO BRAND NAME)	70													CHOLERA (USP)	70													COVID19 (COVID19 (JANSSEN))	70
ANTHRAX (BIOTHRAX)	71													BCG (NO BRAND NAME)	71													CHOLERA (USP)	71													COVID19 (COVID19 (JANSSEN))	71
ANTHRAX (BIOTHRAX)	72													BCG (NO BRAND NAME)	72													CHOLERA (USP)	72													COVID19 (COVID19 (JANSSEN))	72
ANTHRAX (BIOTHRAX)	73													BCG (NO BRAND NAME)	73													CHOLERA (USP)	73													COVID19 (COVID19 (JANSSEN))	73
ANTHRAX (BIOTHRAX)	74													BCG (NO BRAND NAME)	74													CHOLERA (USP)	74													COVID19 (COVID19 (JANSSEN))	74
ANTHRAX (BIOTHRAX)	75													BCG (NO BRAND NAME)	75													CHOLERA (USP)	75													COVID19 (COVID19 (JANSSEN))	75
ANTHRAX (BIOTHRAX)	76													BCG (NO BRAND NAME)	76													CHOLERA (USP)	76													COVID19 (COVID19 (JANSSEN))	76
ANTHRAX (BIOTHRAX)	77													BCG (NO BRAND NAME)	77													CHOLERA (USP)	77													COVID19 (COVID19 (JANSSEN))	77
ANTHRAX (BIOTHRAX)	78													BCG (NO BRAND NAME)	78													CHOLERA (USP)	78													COVID19 (COVID19 (JANSSEN))	78
ANTHRAX (BIOTHRAX)	79													BCG (NO BRAND NAME)	79													CHOLERA (USP)	79													COVID19 (COVID19 (JANSSEN))	79
ANTHRAX (BIOTHRAX)	80													BCG (NO BRAND NAME)	80													CHOLERA (USP)	80													COVID19 (COVID19 (JANSSEN))	80
ANTHRAX (BIOTHRAX)	81													BCG (NO BRAND NAME)	81													CHOLERA (USP)	81													COVID19 (COVID19 (JANSSEN))	81
ANTHRAX (BIOTHRAX)	82													BCG (NO BRAND NAME)	82													CHOLERA (USP)	82													COVID19 (COVID19 (JANSSEN))	82
ANTHRAX (BIOTHRAX)	83													BCG (NO BRAND NAME)	83													CHOLERA (USP)	83													COVID19 (COVID19 (JANSSEN))	83
ANTHRAX (BIOTHRAX)	84													BCG (NO BRAND NAME)	84													CHOLERA (USP)	84													COVID19 (COVID19 (JANSSEN))	84
ANTHRAX (BIOTHRAX)	85													BCG (NO BRAND NAME)	85													CHOLERA (USP)	85													COVID19 (COVID19 (JANSSEN))	85
ANTHRAX (BIOTHRAX)	86													BCG (NO BRAND NAME)	86													CHOLERA (USP)	86													COVID19 (COVID19 (JANSSEN))	86
ANTHRAX (BIOTHRAX)	87													BCG (NO BRAND NAME)	87													CHOLERA (USP)	87													COVID19 (COVID19 (JANSSEN))	87
ANTHRAX (BIOTHRAX)	88													BCG (NO BRAND NAME)	88													CHOLERA (USP)	88													COVID19 (COVID19 (JANSSEN))	88
ANTHRAX (BIOTHRAX)	89													BCG (NO BRAND NAME)	89													CHOLERA (USP)	89													COVID19 (COVID19 (JANSSEN))	89
ANTHRAX (BIOTHRAX)	90													BCG (NO BRAND NAME)	90													CHOLERA (USP)	90													COVID19 (COVID19 (JANSSEN))	90
ANTHRAX (BIOTHRAX)	91													BCG (NO BRAND NAME)	91													CHOLERA (USP)	91													COVID19 (COVID19 (JANSSEN))	91
ANTHRAX (BIOTHRAX)	92													BCG (NO BRAND NAME)	92													CHOLERA (USP)	92													COVID19 (COVID19 (JANSSEN))	92
ANTHRAX (BIOTHRAX)	93													BCG (NO BRAND NAME)	93													CHOLERA (USP)	93													COVID19 (COVID19 (JANSSEN))	93
ANTHRAX (BIOTHRAX)	94													BCG (NO BRAND NAME)	94													CHOLERA (USP)	94													COVID19 (COVID19 (JANSSEN))	94
ANTHRAX (BIOTHRAX)	95													BCG (NO BRAND NAME)	95													CHOLERA (USP)	95													COVID19 (COVID19 (JANSSEN))	95
ANTHRAX (BIOTHRAX)	96													BCG (NO BRAND NAME)	96													CHOLERA (USP)	96													COVID19 (COVID19 (JANSSEN))	96
ANTHRAX (BIOTHRAX)	97													BCG (NO BRAND NAME)	97													CHOLERA (USP)	97													COVID19 (COVID19 (JANSSEN))	97
ANTHRAX (BIOTHRAX)	98													BCG (NO BRAND NAME)	98													CHOLERA (USP)	98													COVID19 (COVID19 (JANSSEN))	98
ANTHRAX (BIOTHRAX)	99													BCG (NO BRAND NAME)	99													CHOLERA (USP)	99													COVID19 (COVID19 (JANSSEN))	99
ANTHRAX (BIOTHRAX)	100													BCG (NO BRAND NAME)	100													CHOLERA (USP)	100													COVID19 (COVID19 (JANSSEN))	100
ANTHRAX (BIOTHRAX)	101													BCG (NO BRAND NAME)	101													CHOLERA (USP)	101													COVID19 (COVID19 (JANSSEN))	101
ANTHRAX (BIOTHRAX)	102													BCG (NO BRAND NAME)	102													CHOLERA (USP)	102													COVID19 (COVID19 (JANSSEN))	102
ANTHRAX (BIOTHRAX)	103													BCG (NO BRAND NAME)	103													CHOLERA (USP)	103													COVID19 (COVID19 (JANSSEN))	103
ANTHRAX (BIOTHRAX)	104													BCG (NO BRAND NAME)	104													CHOLERA (USP)	104													COVID19 (COVID19 (JANSSEN))	104
ANTHRAX (BIOTHRAX)	105													BCG (NO BRAND NAME)	105													CHOLERA (USP)	105													COVID19 (COVID19 (JANSSEN))	105
ANTHRAX (BIOTHRAX)	106													BCG (NO BRAND NAME)	106													CHOLERA (USP)	106													COVID19 (COVID19 (JANSSEN))	106
ANTHRAX (BIOTHRAX)	107													BCG (NO BRAND NAME)	107													CHOLERA (USP)	107													COVID19 (COVID19 (JANSSEN))	107
ANTHRAX (BIOTHRAX)	108													BCG (NO BRAND NAME)	108													CHOLERA (USP)	108													COVID19 (COVID19 (JANSSEN))	108
ANTHRAX (BIOTHRAX)	109													BCG (NO BRAND NAME)	109													CHOLERA (USP)	109													COVID19 (COVID19 (JANSSEN))	109
ANTHRAX (BIOTHRAX)	110													BCG (NO BRAND NAME)	110													CHOLERA (USP)	110													COVID19 (COVID19 (JANSSEN))	110
ANTHRAX (BIOTHRAX)	111													BCG (NO BRAND NAME)	111													CHOLERA (USP)	111													COVID19 (COVID19 (JANSSEN))	111
ANTHRAX (BIOTHRAX)	112													BCG (NO BRAND NAME)	112													CHOLERA (USP)	112													COVID19 (COVID19 (JANSSEN))	112
ANTHRAX (BIOTHRAX)	113													BCG (NO BRAND NAME)	113													CHOLERA (USP)	113													COVID19 (COVID19 (JANSSEN))	113
ANTHRAX (BIOTHRAX)	114													BCG (NO BRAND NAME)	114													CHOLERA (USP)	114													COVID19 (COVID19 (JANSSEN))	114
ANTHRAX (BIOTHRAX)	115													BCG (NO BRAND NAME)	115													CHOLERA (USP)	115													COVID19 (COVID19 (JANSSEN))	115
ANTHRAX (BIOTHRAX)	116													BCG (NO BRAND NAME)	116													CHOLERA (USP)	116													COVID19 (COVID19 (JANSSEN))	116
ANTHRAX (BIOTHRAX)	117													BCG (NO BRAND NAME)	117													CHOLERA (USP)	117													COVID19 (COVID19 (JANSSEN))	117
ANTHRAX (BIOTHRAX)	118													BCG (NO BRAND NAME)	118													CHOLERA (USP)	118													COVID19 (COVID19 (JANSSEN))	118
ANTHRAX (BIOTHRAX)	119													BCG (NO BRAND NAME)	119													CHOLERA (USP)	119													COVID19 (COVID19 (JANSSEN))	119
ANTHRAX (BIOTHRAX)	120													BCG (NO BRAND NAME)	120													CHOLERA (USP)	120													COVID19 (COVID19 (JANSSEN))	120
Onset report
ANTHRAX (BIOTHRAX)	Onset	All	1	2	3	All Male	1 Male	2 Male	3 Male	All Female	1 Female	2 Female	3 Female	BCG (NO BRAND NAME)	Onset	All	1	2	3	All Male	1 Male	2 Male	3 Male	All Female	1 Female	2 Female	3 Female	CHOLERA (USP)	Onset	All	1	2	3	All Male	1 Male	2 Male	3 Male	All Female	1 Female	2 Female	3 Female	COVID19 (COVID19 (JANSSEN))	Onset	All	1	2	3	All Male	1 Male
ANTHRAX (BIOTHRAX)	0	4								4				BCG (NO BRAND NAME)	0	1								1				CHOLERA (USP)	0	1								1				COVID19 (COVID19 (JANSSEN))	0	88	36
ANTHRAX (BIOTHRAX)	1													BCG (NO BRAND NAME)	1													CHOLERA (USP)	1													COVID19 (COVID19 (JANSSEN))	1	25	16
ANTHRAX (BIOTHRAX)	2													BCG (NO BRAND NAME)	2													CHOLERA (USP)	2													COVID19 (COVID19 (JANSSEN))	2	18	15
ANTHRAX (BIOTHRAX)	3													BCG (NO BRAND NAME)	3													CHOLERA (USP)	3													COVID19 (COVID19 (JANSSEN))	3	16	11
ANTHRAX (BIOTHRAX)	4													BCG (NO BRAND NAME)	4													CHOLERA (USP)	4													COVID19 (COVID19 (JANSSEN))	4	6	4
ANTHRAX (BIOTHRAX)	5													BCG (NO BRAND NAME)	5													CHOLERA (USP)	5													COVID19 (COVID19 (JANSSEN))	5	2	2
ANTHRAX (BIOTHRAX)	6													BCG (NO BRAND NAME)	6													CHOLERA (USP)	6													COVID19 (COVID19 (JANSSEN))	6	6	5			1	1
ANTHRAX (BIOTHRAX)	7													BCG (NO BRAND NAME)	7													CHOLERA (USP)	7													COVID19 (COVID19 (JANSSEN))	7	8	4
ANTHRAX (BIOTHRAX)	8													BCG (NO BRAND NAME)	8													CHOLERA (USP)	8													COVID19 (COVID19 (JANSSEN))	8	4	4
ANTHRAX (BIOTHRAX)	9													BCG (NO BRAND NAME)	9													CHOLERA (USP)	9													COVID19 (COVID19 (JANSSEN))	9	4	4
ANTHRAX (BIOTHRAX)	10													BCG (NO BRAND NAME)	10													CHOLERA (USP)	10													COVID19 (COVID19 (JANSSEN))	10	2	1
ANTHRAX (BIOTHRAX)	11													BCG (NO BRAND NAME)	11													CHOLERA (USP)	11													COVID19 (COVID19 (JANSSEN))	11	2	2
ANTHRAX (BIOTHRAX)	12													BCG (NO BRAND NAME)	12													CHOLERA (USP)	12													COVID19 (COVID19 (JANSSEN))	12	3	3
ANTHRAX (BIOTHRAX)	13													BCG (NO BRAND NAME)	13													CHOLERA (USP)	13													COVID19 (COVID19 (JANSSEN))	13	4	3
ANTHRAX (BIOTHRAX)	14													BCG (NO BRAND NAME)	14													CHOLERA (USP)	14													COVID19 (COVID19 (JANSSEN))	14	3	3
ANTHRAX (BIOTHRAX)	15													BCG (NO BRAND NAME)	15													CHOLERA (USP)	15													COVID19 (COVID19 (JANSSEN))	15	2	2
ANTHRAX (BIOTHRAX)	16													BCG (NO BRAND NAME)	16													CHOLERA (USP)	16													COVID19 (COVID19 (JANSSEN))	16	5	4
ANTHRAX (BIOTHRAX)	17	1	1							1	1			BCG (NO BRAND NAME)	17													CHOLERA (USP)	17													COVID19 (COVID19 (JANSSEN))	17
ANTHRAX (BIOTHRAX)	18													BCG (NO BRAND NAME)	18													CHOLERA (USP)	18													COVID19 (COVID19 (JANSSEN))	18	3	2
ANTHRAX (BIOTHRAX)	19													BCG (NO BRAND NAME)	19													CHOLERA (USP)	19													COVID19 (COVID19 (JANSSEN))	19	3	1
ANTHRAX (BIOTHRAX)	20													BCG (NO BRAND NAME)	20													CHOLERA (USP)	20													COVID19 (COVID19 (JANSSEN))	20	1	1
ANTHRAX (BIOTHRAX)	21													BCG (NO BRAND NAME)	21													CHOLERA (USP)	21													COVID19 (COVID19 (JANSSEN))	21	3	3
ANTHRAX (BIOTHRAX)	22													BCG (NO BRAND NAME)	22													CHOLERA (USP)	22													COVID19 (COVID19 (JANSSEN))	22	4	3
ANTHRAX (BIOTHRAX)	23													BCG (NO BRAND NAME)	23													CHOLERA (USP)	23													COVID19 (COVID19 (JANSSEN))	23	4	3
ANTHRAX (BIOTHRAX)	24													BCG (NO BRAND NAME)	24													CHOLERA (USP)	24													COVID19 (COVID19 (JANSSEN))	24	1
ANTHRAX (BIOTHRAX)	25													BCG (NO BRAND NAME)	25													CHOLERA (USP)	25													COVID19 (COVID19 (JANSSEN))	25	4	4
ANTHRAX (BIOTHRAX)	26													BCG (NO BRAND NAME)	26													CHOLERA (USP)	26													COVID19 (COVID19 (JANSSEN))	26
ANTHRAX (BIOTHRAX)	27													BCG (NO BRAND NAME)	27													CHOLERA (USP)	27													COVID19 (COVID19 (JANSSEN))	27
ANTHRAX (BIOTHRAX)	28													BCG (NO BRAND NAME)	28													CHOLERA (USP)	28													COVID19 (COVID19 (JANSSEN))	28
ANTHRAX (BIOTHRAX)	29													BCG (NO BRAND NAME)	29													CHOLERA (USP)	29													COVID19 (COVID19 (JANSSEN))	29
ANTHRAX (BIOTHRAX)	30													BCG (NO BRAND NAME)	30													CHOLERA (USP)	30													COVID19 (COVID19 (JANSSEN))	30	2	1	1
ANTHRAX (BIOTHRAX)	31													BCG (NO BRAND NAME)	31													CHOLERA (USP)	31													COVID19 (COVID19 (JANSSEN))	31	2	2
ANTHRAX (BIOTHRAX)	32													BCG (NO BRAND NAME)	32													CHOLERA (USP)	32													COVID19 (COVID19 (JANSSEN))	32
ANTHRAX (BIOTHRAX)	33													BCG (NO BRAND NAME)	33													CHOLERA (USP)	33													COVID19 (COVID19 (JANSSEN))	33	1	1
ANTHRAX (BIOTHRAX)	34													BCG (NO BRAND NAME)	34													CHOLERA (USP)	34													COVID19 (COVID19 (JANSSEN))	34
ANTHRAX (BIOTHRAX)	35													BCG (NO BRAND NAME)	35													CHOLERA (USP)	35													COVID19 (COVID19 (JANSSEN))	35	2
ANTHRAX (BIOTHRAX)	36													BCG (NO BRAND NAME)	36													CHOLERA (USP)	36													COVID19 (COVID19 (JANSSEN))	36	1	1
ANTHRAX (BIOTHRAX)	37													BCG (NO BRAND NAME)	37													CHOLERA (USP)	37													COVID19 (COVID19 (JANSSEN))	37	2	2
ANTHRAX (BIOTHRAX)	38													BCG (NO BRAND NAME)	38													CHOLERA (USP)	38													COVID19 (COVID19 (JANSSEN))	38	3	2
ANTHRAX (BIOTHRAX)	39													BCG (NO BRAND NAME)	39													CHOLERA (USP)	39													COVID19 (COVID19 (JANSSEN))	39	1	1
ANTHRAX (BIOTHRAX)	40													BCG (NO BRAND NAME)	40													CHOLERA (USP)	40													COVID19 (COVID19 (JANSSEN))	40
ANTHRAX (BIOTHRAX)	41													BCG (NO BRAND NAME)	41													CHOLERA (USP)	41													COVID19 (COVID19 (JANSSEN))	41	2	1
ANTHRAX (BIOTHRAX)	42													BCG (NO BRAND NAME)	42													CHOLERA (USP)	42													COVID19 (COVID19 (JANSSEN))	42
ANTHRAX (BIOTHRAX)	43													BCG (NO BRAND NAME)	43													CHOLERA (USP)	43													COVID19 (COVID19 (JANSSEN))	43	1
ANTHRAX (BIOTHRAX)	44													BCG (NO BRAND NAME)	44													CHOLERA (USP)	44													COVID19 (COVID19 (JANSSEN))	44	1	1
ANTHRAX (BIOTHRAX)	45													BCG (NO BRAND NAME)	45													CHOLERA (USP)	45													COVID19 (COVID19 (JANSSEN))	45
ANTHRAX (BIOTHRAX)	46													BCG (NO BRAND NAME)	46													CHOLERA (USP)	46													COVID19 (COVID19 (JANSSEN))	46
ANTHRAX (BIOTHRAX)	47													BCG (NO BRAND NAME)	47													CHOLERA (USP)	47													COVID19 (COVID19 (JANSSEN))	47	1	1
ANTHRAX (BIOTHRAX)	48													BCG (NO BRAND NAME)	48													CHOLERA (USP)	48													COVID19 (COVID19 (JANSSEN))	48
ANTHRAX (BIOTHRAX)	49													BCG (NO BRAND NAME)	49													CHOLERA (USP)	49													COVID19 (COVID19 (JANSSEN))	49
ANTHRAX (BIOTHRAX)	50													BCG (NO BRAND NAME)	50													CHOLERA (USP)	50													COVID19 (COVID19 (JANSSEN))	50
ANTHRAX (BIOTHRAX)	51													BCG (NO BRAND NAME)	51													CHOLERA (USP)	51													COVID19 (COVID19 (JANSSEN))	51	1
ANTHRAX (BIOTHRAX)	52													BCG (NO BRAND NAME)	52													CHOLERA (USP)	52													COVID19 (COVID19 (JANSSEN))	52
ANTHRAX (BIOTHRAX)	53													BCG (NO BRAND NAME)	53													CHOLERA (USP)	53													COVID19 (COVID19 (JANSSEN))	53
ANTHRAX (BIOTHRAX)	54													BCG (NO BRAND NAME)	54													CHOLERA (USP)	54													COVID19 (COVID19 (JANSSEN))	54
ANTHRAX (BIOTHRAX)	55													BCG (NO BRAND NAME)	55													CHOLERA (USP)	55													COVID19 (COVID19 (JANSSEN))	55
ANTHRAX (BIOTHRAX)	56													BCG (NO BRAND NAME)	56													CHOLERA (USP)	56													COVID19 (COVID19 (JANSSEN))	56
ANTHRAX (BIOTHRAX)	57													BCG (NO BRAND NAME)	57													CHOLERA (USP)	57													COVID19 (COVID19 (JANSSEN))	57
ANTHRAX (BIOTHRAX)	58													BCG (NO BRAND NAME)	58													CHOLERA (USP)	58													COVID19 (COVID19 (JANSSEN))	58
ANTHRAX (BIOTHRAX)	59													BCG (NO BRAND NAME)	59													CHOLERA (USP)	59													COVID19 (COVID19 (JANSSEN))	59
ANTHRAX (BIOTHRAX)	60													BCG (NO BRAND NAME)	60													CHOLERA (USP)	60													COVID19 (COVID19 (JANSSEN))	60
ANTHRAX (BIOTHRAX)	61													BCG (NO BRAND NAME)	61													CHOLERA (USP)	61													COVID19 (COVID19 (JANSSEN))	61
ANTHRAX (BIOTHRAX)	62													BCG (NO BRAND NAME)	62													CHOLERA (USP)	62													COVID19 (COVID19 (JANSSEN))	62
ANTHRAX (BIOTHRAX)	63													BCG (NO BRAND NAME)	63													CHOLERA (USP)	63													COVID19 (COVID19 (JANSSEN))	63
ANTHRAX (BIOTHRAX)	64													BCG (NO BRAND NAME)	64													CHOLERA (USP)	64													COVID19 (COVID19 (JANSSEN))	64
ANTHRAX (BIOTHRAX)	65													BCG (NO BRAND NAME)	65													CHOLERA (USP)	65													COVID19 (COVID19 (JANSSEN))	65
ANTHRAX (BIOTHRAX)	66													BCG (NO BRAND NAME)	66													CHOLERA (USP)	66													COVID19 (COVID19 (JANSSEN))	66
ANTHRAX (BIOTHRAX)	67													BCG (NO BRAND NAME)	67													CHOLERA (USP)	67													COVID19 (COVID19 (JANSSEN))	67
ANTHRAX (BIOTHRAX)	68													BCG (NO BRAND NAME)	68													CHOLERA (USP)	68													COVID19 (COVID19 (JANSSEN))	68
ANTHRAX (BIOTHRAX)	69													BCG (NO BRAND NAME)	69													CHOLERA (USP)	69													COVID19 (COVID19 (JANSSEN))	69
ANTHRAX (BIOTHRAX)	70													BCG (NO BRAND NAME)	70													CHOLERA (USP)	70													COVID19 (COVID19 (JANSSEN))	70
ANTHRAX (BIOTHRAX)	71													BCG (NO BRAND NAME)	71													CHOLERA (USP)	71													COVID19 (COVID19 (JANSSEN))	71
ANTHRAX (BIOTHRAX)	72													BCG (NO BRAND NAME)	72													CHOLERA (USP)	72													COVID19 (COVID19 (JANSSEN))	72
ANTHRAX (BIOTHRAX)	73													BCG (NO BRAND NAME)	73													CHOLERA (USP)	73													COVID19 (COVID19 (JANSSEN))	73
ANTHRAX (BIOTHRAX)	74													BCG (NO BRAND NAME)	74													CHOLERA (USP)	74													COVID19 (COVID19 (JANSSEN))	74
ANTHRAX (BIOTHRAX)	75													BCG (NO BRAND NAME)	75													CHOLERA (USP)	75													COVID19 (COVID19 (JANSSEN))	75
ANTHRAX (BIOTHRAX)	76													BCG (NO BRAND NAME)	76													CHOLERA (USP)	76													COVID19 (COVID19 (JANSSEN))	76
ANTHRAX (BIOTHRAX)	77													BCG (NO BRAND NAME)	77													CHOLERA (USP)	77													COVID19 (COVID19 (JANSSEN))	77
ANTHRAX (BIOTHRAX)	78													BCG (NO BRAND NAME)	78													CHOLERA (USP)	78													COVID19 (COVID19 (JANSSEN))	78
ANTHRAX (BIOTHRAX)	79													BCG (NO BRAND NAME)	79													CHOLERA (USP)	79													COVID19 (COVID19 (JANSSEN))	79
ANTHRAX (BIOTHRAX)	80													BCG (NO BRAND NAME)	80													CHOLERA (USP)	80													COVID19 (COVID19 (JANSSEN))	80
ANTHRAX (BIOTHRAX)	81													BCG (NO BRAND NAME)	81													CHOLERA (USP)	81													COVID19 (COVID19 (JANSSEN))	81
ANTHRAX (BIOTHRAX)	82													BCG (NO BRAND NAME)	82													CHOLERA (USP)	82													COVID19 (COVID19 (JANSSEN))	82
ANTHRAX (BIOTHRAX)	83													BCG (NO BRAND NAME)	83													CHOLERA (USP)	83													COVID19 (COVID19 (JANSSEN))	83
ANTHRAX (BIOTHRAX)	84													BCG (NO BRAND NAME)	84													CHOLERA (USP)	84													COVID19 (COVID19 (JANSSEN))	84
ANTHRAX (BIOTHRAX)	85													BCG (NO BRAND NAME)	85													CHOLERA (USP)	85													COVID19 (COVID19 (JANSSEN))	85
ANTHRAX (BIOTHRAX)	86													BCG (NO BRAND NAME)	86													CHOLERA (USP)	86													COVID19 (COVID19 (JANSSEN))	86
ANTHRAX (BIOTHRAX)	87													BCG (NO BRAND NAME)	87													CHOLERA (USP)	87													COVID19 (COVID19 (JANSSEN))	87
ANTHRAX (BIOTHRAX)	88													BCG (NO BRAND NAME)	88													CHOLERA (USP)	88													COVID19 (COVID19 (JANSSEN))	88
ANTHRAX (BIOTHRAX)	89													BCG (NO BRAND NAME)	89													CHOLERA (USP)	89													COVID19 (COVID19 (JANSSEN))	89
ANTHRAX (BIOTHRAX)	90													BCG (NO BRAND NAME)	90													CHOLERA (USP)	90													COVID19 (COVID19 (JANSSEN))	90
ANTHRAX (BIOTHRAX)	91													BCG (NO BRAND NAME)	91													CHOLERA (USP)	91													COVID19 (COVID19 (JANSSEN))	91
ANTHRAX (BIOTHRAX)	92													BCG (NO BRAND NAME)	92													CHOLERA (USP)	92													COVID19 (COVID19 (JANSSEN))	92
ANTHRAX (BIOTHRAX)	93													BCG (NO BRAND NAME)	93													CHOLERA (USP)	93													COVID19 (COVID19 (JANSSEN))	93
ANTHRAX (BIOTHRAX)	94													BCG (NO BRAND NAME)	94													CHOLERA (USP)	94													COVID19 (COVID19 (JANSSEN))	94
ANTHRAX (BIOTHRAX)	95													BCG (NO BRAND NAME)	95													CHOLERA (USP)	95													COVID19 (COVID19 (JANSSEN))	95
ANTHRAX (BIOTHRAX)	96													BCG (NO BRAND NAME)	96													CHOLERA (USP)	96													COVID19 (COVID19 (JANSSEN))	96
ANTHRAX (BIOTHRAX)	97													BCG (NO BRAND NAME)	97													CHOLERA (USP)	97													COVID19 (COVID19 (JANSSEN))	97
ANTHRAX (BIOTHRAX)	98													BCG (NO BRAND NAME)	98													CHOLERA (USP)	98													COVID19 (COVID19 (JANSSEN))	98
ANTHRAX (BIOTHRAX)	99													BCG (NO BRAND NAME)	99													CHOLERA (USP)	99													COVID19 (COVID19 (JANSSEN))	99
ANTHRAX (BIOTHRAX)	100													BCG (NO BRAND NAME)	100													CHOLERA (USP)	100													COVID19 (COVID19 (JANSSEN))	100
ANTHRAX (BIOTHRAX)	101													BCG (NO BRAND NAME)	101													CHOLERA (USP)	101													COVID19 (COVID19 (JANSSEN))	101
ANTHRAX (BIOTHRAX)	102													BCG (NO BRAND NAME)	102													CHOLERA (USP)	102													COVID19 (COVID19 (JANSSEN))	102
ANTHRAX (BIOTHRAX)	103													BCG (NO BRAND NAME)	103													CHOLERA (USP)	103													COVID19 (COVID19 (JANSSEN))	103
ANTHRAX (BIOTHRAX)	104													BCG (NO BRAND NAME)	104													CHOLERA (USP)	104													COVID19 (COVID19 (JANSSEN))	104
ANTHRAX (BIOTHRAX)	105													BCG (NO BRAND NAME)	105													CHOLERA (USP)	105													COVID19 (COVID19 (JANSSEN))	105
ANTHRAX (BIOTHRAX)	106													BCG (NO BRAND NAME)	106													CHOLERA (USP)	106													COVID19 (COVID19 (JANSSEN))	106
ANTHRAX (BIOTHRAX)	107													BCG (NO BRAND NAME)	107													CHOLERA (USP)	107													COVID19 (COVID19 (JANSSEN))	107
ANTHRAX (BIOTHRAX)	108													BCG (NO BRAND NAME)	108													CHOLERA (USP)	108													COVID19 (COVID19 (JANSSEN))	108
ANTHRAX (BIOTHRAX)	109													BCG (NO BRAND NAME)	109													CHOLERA (USP)	109													COVID19 (COVID19 (JANSSEN))	109
ANTHRAX (BIOTHRAX)	110													BCG (NO BRAND NAME)	110													CHOLERA (USP)	110													COVID19 (COVID19 (JANSSEN))	110
ANTHRAX (BIOTHRAX)	111													BCG (NO BRAND NAME)	111													CHOLERA (USP)	111													COVID19 (COVID19 (JANSSEN))	111
ANTHRAX (BIOTHRAX)	112													BCG (NO BRAND NAME)	112													CHOLERA (USP)	112													COVID19 (COVID19 (JANSSEN))	112
ANTHRAX (BIOTHRAX)	113													BCG (NO BRAND NAME)	113													CHOLERA (USP)	113													COVID19 (COVID19 (JANSSEN))	113
ANTHRAX (BIOTHRAX)	114													BCG (NO BRAND NAME)	114													CHOLERA (USP)	114													COVID19 (COVID19 (JANSSEN))	114
ANTHRAX (BIOTHRAX)	115													BCG (NO BRAND NAME)	115													CHOLERA (USP)	115													COVID19 (COVID19 (JANSSEN))	115
ANTHRAX (BIOTHRAX)	116													BCG (NO BRAND NAME)	116													CHOLERA (USP)	116													COVID19 (COVID19 (JANSSEN))	116
ANTHRAX (BIOTHRAX)	117													BCG (NO BRAND NAME)	117													CHOLERA (USP)	117													COVID19 (COVID19 (JANSSEN))	117
ANTHRAX (BIOTHRAX)	118													BCG (NO BRAND NAME)	118													CHOLERA (USP)	118													COVID19 (COVID19 (JANSSEN))	118
ANTHRAX (BIOTHRAX)	119													BCG (NO BRAND NAME)	119													CHOLERA (USP)	119													COVID19 (COVID19 (JANSSEN))	119
ANTHRAX (BIOTHRAX)	120													BCG (NO BRAND NAME)	120													CHOLERA (USP)	120													COVID19 (COVID19 (JANSSEN))	120
[truncated: 636 more columns]

## Sheet: All_menstration_irregular
Dose report
Vaccine	All	1	2	3	4	5	6	7+	UNK	N/A
COVID19 (COVID19 (PFIZER-BIONTECH))	3891	1985	1504	30					371	1
COVID19 (COVID19 (MODERNA))	1250	609	487	8					146
COVID19 (COVID19 (JANSSEN))	317	220	1						85	11
HPV (GARDASIL)	258	101	47	54	4				52
HPV (CERVARIX)	118	29	14	36					39
VACCINE NOT SPECIFIED (NO BRAND NAME)	45	6	8						31
HPV (GARDASIL 9)	26	9	6	4					7
HPV (NO BRAND NAME)	13	5	3	1	1				3
COVID19 (COVID19 (UNKNOWN))	9	4	1						4
HEP A (HAVRIX)	8	5	1						2
HEP B (ENGERIX-B)	6	1	1	2	1				1
ANTHRAX (BIOTHRAX)	6	2	1		1				2
ANTHRAX (NO BRAND NAME)	4	3	1
INFLUENZA (SEASONAL) (FLUZONE)	4	2		1					1
MENINGOCOCCAL CONJUGATE (MENACTRA)	4	4
HEP B (RECOMBIVAX HB)	3	2	1
VARICELLA (VARIVAX)	3	1	1						1
LYME (LYMERIX)	3	1	2
HEP A (VAQTA)	3	2	1
INFLUENZA (SEASONAL) (FLUMIST)	3				1	1			1
TDAP (ADACEL)	3		1						2
HEP A (NO BRAND NAME)	3		2						1
INFLUENZA (SEASONAL) (FLUVIRIN)	2							1	1
SMALLPOX (DRYVAX)	2	2
TDAP (NO BRAND NAME)	2	1							1
TETANUS DIPHTHERIA (NO BRAND NAME)	2		1				1
VARICELLA (NO BRAND NAME)	2		1						1
TDAP (BOOSTRIX)	2	1							1
INFLUENZA (SEASONAL) (AFLURIA)	2					1			1
TYPHOID VI POLYSACCHARIDE (TYPHIM VI)	2	1							1
MENINGOCOCCAL CONJUGATE (MENVEO)	2								2
INFLUENZA (SEASONAL) (FLUCELVAX QUADRIVALENT)	2								2
MEASLES + MUMPS + RUBELLA (PRIORIX)	2								2
MEASLES + MUMPS + RUBELLA (VIRIVAC)	1	1
TD ADSORBED (TDVAX)	1		1
PNEUMO (PNEUMOVAX)	1	1
MEASLES + MUMPS + RUBELLA (MMR II)	1								1
ZOSTER LIVE (ZOSTAVAX)	1								1
DT ADSORBED (NO BRAND NAME)	1								1
INFLUENZA (SEASONAL) (FLUARIX QUADRIVALENT)	1	1
DTAP (DAPTACEL)	1	1
POLIO VIRUS, INACT. (IPOL)	1	1
HEP B (NO BRAND NAME)	1								1
MEASLES + RUBELLA (NO BRAND NAME)	1	1
MENINGOCOCCAL (NO BRAND NAME)	1								1
HEP A + HEP B (TWINRIX)	1	1
MENINGOCOCCAL B (TRUMENBA)	1								1
ZOSTER (SHINGRIX)	1		1
DTAP + IPV + HIB (INFANRIX QUINTA)	1								1
Total	6018
COVID-19	5467
COVID-19 %	0.908441
Age report
ANTHRAX (BIOTHRAX)	Age	All	1	2	3	All Male	1 Male	2 Male	3 Male	All Female	1 Female	2 Female	3 Female	ANTHRAX (NO BRAND NAME)	Age	All	1	2	3	All Male	1 Male	2 Male	3 Male	All Female	1 Female	2 Female	3 Female	COVID19 (COVID19 (JANSSEN))	Age	All	1	2	3	All Male	1 Male	2 Male	3 Male	All Female	1 Female	2 Female	3 Female	COVID19 (COVID19 (MODERNA))	Age	All	1	2	3	All Male	1 Male
ANTHRAX (BIOTHRAX)	0													ANTHRAX (NO BRAND NAME)	0													COVID19 (COVID19 (JANSSEN))	0	21	1							20				COVID19 (COVID19 (MODERNA))	0	55	37	8
ANTHRAX (BIOTHRAX)	1													ANTHRAX (NO BRAND NAME)	1													COVID19 (COVID19 (JANSSEN))	1													COVID19 (COVID19 (MODERNA))	1
ANTHRAX (BIOTHRAX)	2													ANTHRAX (NO BRAND NAME)	2													COVID19 (COVID19 (JANSSEN))	2													COVID19 (COVID19 (MODERNA))	2
ANTHRAX (BIOTHRAX)	3													ANTHRAX (NO BRAND NAME)	3													COVID19 (COVID19 (JANSSEN))	3													COVID19 (COVID19 (MODERNA))	3	1
ANTHRAX (BIOTHRAX)	4													ANTHRAX (NO BRAND NAME)	4													COVID19 (COVID19 (JANSSEN))	4													COVID19 (COVID19 (MODERNA))	4
ANTHRAX (BIOTHRAX)	5													ANTHRAX (NO BRAND NAME)	5													COVID19 (COVID19 (JANSSEN))	5													COVID19 (COVID19 (MODERNA))	5
ANTHRAX (BIOTHRAX)	6													ANTHRAX (NO BRAND NAME)	6													COVID19 (COVID19 (JANSSEN))	6													COVID19 (COVID19 (MODERNA))	6
ANTHRAX (BIOTHRAX)	7													ANTHRAX (NO BRAND NAME)	7													COVID19 (COVID19 (JANSSEN))	7													COVID19 (COVID19 (MODERNA))	7
ANTHRAX (BIOTHRAX)	8													ANTHRAX (NO BRAND NAME)	8													COVID19 (COVID19 (JANSSEN))	8													COVID19 (COVID19 (MODERNA))	8
ANTHRAX (BIOTHRAX)	9													ANTHRAX (NO BRAND NAME)	9													COVID19 (COVID19 (JANSSEN))	9													COVID19 (COVID19 (MODERNA))	9
ANTHRAX (BIOTHRAX)	10													ANTHRAX (NO BRAND NAME)	10													COVID19 (COVID19 (JANSSEN))	10													COVID19 (COVID19 (MODERNA))	10
ANTHRAX (BIOTHRAX)	11													ANTHRAX (NO BRAND NAME)	11													COVID19 (COVID19 (JANSSEN))	11													COVID19 (COVID19 (MODERNA))	11
ANTHRAX (BIOTHRAX)	12													ANTHRAX (NO BRAND NAME)	12													COVID19 (COVID19 (JANSSEN))	12													COVID19 (COVID19 (MODERNA))	12
ANTHRAX (BIOTHRAX)	13													ANTHRAX (NO BRAND NAME)	13													COVID19 (COVID19 (JANSSEN))	13													COVID19 (COVID19 (MODERNA))	13
ANTHRAX (BIOTHRAX)	14													ANTHRAX (NO BRAND NAME)	14													COVID19 (COVID19 (JANSSEN))	14													COVID19 (COVID19 (MODERNA))	14	1		1
ANTHRAX (BIOTHRAX)	15													ANTHRAX (NO BRAND NAME)	15													COVID19 (COVID19 (JANSSEN))	15													COVID19 (COVID19 (MODERNA))	15
ANTHRAX (BIOTHRAX)	16													ANTHRAX (NO BRAND NAME)	16													COVID19 (COVID19 (JANSSEN))	16													COVID19 (COVID19 (MODERNA))	16
ANTHRAX (BIOTHRAX)	17													ANTHRAX (NO BRAND NAME)	17													COVID19 (COVID19 (JANSSEN))	17													COVID19 (COVID19 (MODERNA))	17
ANTHRAX (BIOTHRAX)	18													ANTHRAX (NO BRAND NAME)	18													COVID19 (COVID19 (JANSSEN))	18	1	1							1	1			COVID19 (COVID19 (MODERNA))	18	7	4	1
ANTHRAX (BIOTHRAX)	19													ANTHRAX (NO BRAND NAME)	19													COVID19 (COVID19 (JANSSEN))	19	2	1							2	1			COVID19 (COVID19 (MODERNA))	19	10	4	4
ANTHRAX (BIOTHRAX)	20	2		1						2		1		ANTHRAX (NO BRAND NAME)	20													COVID19 (COVID19 (JANSSEN))	20	4	3							4	3			COVID19 (COVID19 (MODERNA))	20	13	7	6
ANTHRAX (BIOTHRAX)	21	1	1							1	1			ANTHRAX (NO BRAND NAME)	21													COVID19 (COVID19 (JANSSEN))	21	3	3							3	3			COVID19 (COVID19 (MODERNA))	21	7	3	3
ANTHRAX (BIOTHRAX)	22													ANTHRAX (NO BRAND NAME)	22													COVID19 (COVID19 (JANSSEN))	22	5	5							5	5			COVID19 (COVID19 (MODERNA))	22	18	11	4
ANTHRAX (BIOTHRAX)	23													ANTHRAX (NO BRAND NAME)	23	1	1							1	1			COVID19 (COVID19 (JANSSEN))	23	3	2							3	2			COVID19 (COVID19 (MODERNA))	23	11	8	3
ANTHRAX (BIOTHRAX)	24													ANTHRAX (NO BRAND NAME)	24													COVID19 (COVID19 (JANSSEN))	24	4	3							4	3			COVID19 (COVID19 (MODERNA))	24	21	13	6
ANTHRAX (BIOTHRAX)	25													ANTHRAX (NO BRAND NAME)	25													COVID19 (COVID19 (JANSSEN))	25	6	4							6	4			COVID19 (COVID19 (MODERNA))	25	29	18	9
ANTHRAX (BIOTHRAX)	26													ANTHRAX (NO BRAND NAME)	26													COVID19 (COVID19 (JANSSEN))	26	4	3							4	3			COVID19 (COVID19 (MODERNA))	26	38	22	14
ANTHRAX (BIOTHRAX)	27													ANTHRAX (NO BRAND NAME)	27	1		1										COVID19 (COVID19 (JANSSEN))	27	3	3							3	3			COVID19 (COVID19 (MODERNA))	27	32	12	13	1	1	1
ANTHRAX (BIOTHRAX)	28													ANTHRAX (NO BRAND NAME)	28	1	1							1	1			COVID19 (COVID19 (JANSSEN))	28	14	8							14	8			COVID19 (COVID19 (MODERNA))	28	32	13	12
ANTHRAX (BIOTHRAX)	29													ANTHRAX (NO BRAND NAME)	29													COVID19 (COVID19 (JANSSEN))	29	9	6							9	6			COVID19 (COVID19 (MODERNA))	29	42	20	16
ANTHRAX (BIOTHRAX)	30													ANTHRAX (NO BRAND NAME)	30													COVID19 (COVID19 (JANSSEN))	30	7	5							7	5			COVID19 (COVID19 (MODERNA))	30	51	32	17		1
ANTHRAX (BIOTHRAX)	31													ANTHRAX (NO BRAND NAME)	31													COVID19 (COVID19 (JANSSEN))	31	10	8							10	8			COVID19 (COVID19 (MODERNA))	31	43	21	19	1
ANTHRAX (BIOTHRAX)	32													ANTHRAX (NO BRAND NAME)	32	1	1							1	1			COVID19 (COVID19 (JANSSEN))	32	12	7							12	7			COVID19 (COVID19 (MODERNA))	32	47	21	23
ANTHRAX (BIOTHRAX)	33													ANTHRAX (NO BRAND NAME)	33													COVID19 (COVID19 (JANSSEN))	33	10	6			1				9	6			COVID19 (COVID19 (MODERNA))	33	49	25	21		1
ANTHRAX (BIOTHRAX)	34													ANTHRAX (NO BRAND NAME)	34													COVID19 (COVID19 (JANSSEN))	34	17	11							17	11			COVID19 (COVID19 (MODERNA))	34	47	20	21
ANTHRAX (BIOTHRAX)	35													ANTHRAX (NO BRAND NAME)	35													COVID19 (COVID19 (JANSSEN))	35	5	5							5	5			COVID19 (COVID19 (MODERNA))	35	52	31	19
ANTHRAX (BIOTHRAX)	36													ANTHRAX (NO BRAND NAME)	36													COVID19 (COVID19 (JANSSEN))	36	10	8							10	8			COVID19 (COVID19 (MODERNA))	36	37	17	19
ANTHRAX (BIOTHRAX)	37													ANTHRAX (NO BRAND NAME)	37													COVID19 (COVID19 (JANSSEN))	37	12	8							12	8			COVID19 (COVID19 (MODERNA))	37	39	18	18
ANTHRAX (BIOTHRAX)	38													ANTHRAX (NO BRAND NAME)	38													COVID19 (COVID19 (JANSSEN))	38	14	12	1						14	12	1		COVID19 (COVID19 (MODERNA))	38	51	20	20
ANTHRAX (BIOTHRAX)	39													ANTHRAX (NO BRAND NAME)	39													COVID19 (COVID19 (JANSSEN))	39	15	11							15	11			COVID19 (COVID19 (MODERNA))	39	51	20	24
ANTHRAX (BIOTHRAX)	40													ANTHRAX (NO BRAND NAME)	40													COVID19 (COVID19 (JANSSEN))	40	18	14							18	14			COVID19 (COVID19 (MODERNA))	40	46	18	20
ANTHRAX (BIOTHRAX)	41	1	1							1	1			ANTHRAX (NO BRAND NAME)	41													COVID19 (COVID19 (JANSSEN))	41	13	10							13	10			COVID19 (COVID19 (MODERNA))	41	37	15	15
ANTHRAX (BIOTHRAX)	42													ANTHRAX (NO BRAND NAME)	42													COVID19 (COVID19 (JANSSEN))	42	11	8							11	8			COVID19 (COVID19 (MODERNA))	42	38	21	11	1
ANTHRAX (BIOTHRAX)	43													ANTHRAX (NO BRAND NAME)	43													COVID19 (COVID19 (JANSSEN))	43	14	10			2	2			12	8			COVID19 (COVID19 (MODERNA))	43	42	20	18
ANTHRAX (BIOTHRAX)	44	2								2				ANTHRAX (NO BRAND NAME)	44													COVID19 (COVID19 (JANSSEN))	44	4	1							4	1			COVID19 (COVID19 (MODERNA))	44	44	25	10
ANTHRAX (BIOTHRAX)	45													ANTHRAX (NO BRAND NAME)	45													COVID19 (COVID19 (JANSSEN))	45	15	14							15	14			COVID19 (COVID19 (MODERNA))	45	35	13	21
ANTHRAX (BIOTHRAX)	46													ANTHRAX (NO BRAND NAME)	46													COVID19 (COVID19 (JANSSEN))	46	7	4							7	4			COVID19 (COVID19 (MODERNA))	46	48	23	18	1
ANTHRAX (BIOTHRAX)	47													ANTHRAX (NO BRAND NAME)	47													COVID19 (COVID19 (JANSSEN))	47	7	5							7	5			COVID19 (COVID19 (MODERNA))	47	35	19	15		1
ANTHRAX (BIOTHRAX)	48													ANTHRAX (NO BRAND NAME)	48													COVID19 (COVID19 (JANSSEN))	48	5	4							5	4			COVID19 (COVID19 (MODERNA))	48	28	13	10
ANTHRAX (BIOTHRAX)	49													ANTHRAX (NO BRAND NAME)	49													COVID19 (COVID19 (JANSSEN))	49	10	9							10	9			COVID19 (COVID19 (MODERNA))	49	28	11	11	1
ANTHRAX (BIOTHRAX)	50													ANTHRAX (NO BRAND NAME)	50													COVID19 (COVID19 (JANSSEN))	50	6	5							6	5			COVID19 (COVID19 (MODERNA))	50	22	8	12
ANTHRAX (BIOTHRAX)	51													ANTHRAX (NO BRAND NAME)	51													COVID19 (COVID19 (JANSSEN))	51	6	4							6	4			COVID19 (COVID19 (MODERNA))	51	23	10	9	2
ANTHRAX (BIOTHRAX)	52													ANTHRAX (NO BRAND NAME)	52													COVID19 (COVID19 (JANSSEN))	52	1	1							1	1			COVID19 (COVID19 (MODERNA))	52	15	5	8
ANTHRAX (BIOTHRAX)	53													ANTHRAX (NO BRAND NAME)	53													COVID19 (COVID19 (JANSSEN))	53	3	2							3	2			COVID19 (COVID19 (MODERNA))	53	2	1	1
ANTHRAX (BIOTHRAX)	54													ANTHRAX (NO BRAND NAME)	54													COVID19 (COVID19 (JANSSEN))	54	2	2							2	2			COVID19 (COVID19 (MODERNA))	54	5	3	1
ANTHRAX (BIOTHRAX)	55													ANTHRAX (NO BRAND NAME)	55													COVID19 (COVID19 (JANSSEN))	55	1	1							1	1			COVID19 (COVID19 (MODERNA))	55	1
ANTHRAX (BIOTHRAX)	56													ANTHRAX (NO BRAND NAME)	56													COVID19 (COVID19 (JANSSEN))	56													COVID19 (COVID19 (MODERNA))	56	6	2	3
ANTHRAX (BIOTHRAX)	57													ANTHRAX (NO BRAND NAME)	57													COVID19 (COVID19 (JANSSEN))	57													COVID19 (COVID19 (MODERNA))	57	1	1
ANTHRAX (BIOTHRAX)	58													ANTHRAX (NO BRAND NAME)	58													COVID19 (COVID19 (JANSSEN))	58	2	1							2	1			COVID19 (COVID19 (MODERNA))	58	2	1
ANTHRAX (BIOTHRAX)	59													ANTHRAX (NO BRAND NAME)	59													COVID19 (COVID19 (JANSSEN))	59													COVID19 (COVID19 (MODERNA))	59	3	1	1
ANTHRAX (BIOTHRAX)	60													ANTHRAX (NO BRAND NAME)	60													COVID19 (COVID19 (JANSSEN))	60													COVID19 (COVID19 (MODERNA))	60	2	1	1
ANTHRAX (BIOTHRAX)	61													ANTHRAX (NO BRAND NAME)	61													COVID19 (COVID19 (JANSSEN))	61													COVID19 (COVID19 (MODERNA))	61
ANTHRAX (BIOTHRAX)	62													ANTHRAX (NO BRAND NAME)	62													COVID19 (COVID19 (JANSSEN))	62													COVID19 (COVID19 (MODERNA))	62	2	1	1
ANTHRAX (BIOTHRAX)	63													ANTHRAX (NO BRAND NAME)	63													COVID19 (COVID19 (JANSSEN))	63													COVID19 (COVID19 (MODERNA))	63
ANTHRAX (BIOTHRAX)	64													ANTHRAX (NO BRAND NAME)	64													COVID19 (COVID19 (JANSSEN))	64	1	1							1	1			COVID19 (COVID19 (MODERNA))	64
ANTHRAX (BIOTHRAX)	65													ANTHRAX (NO BRAND NAME)	65													COVID19 (COVID19 (JANSSEN))	65													COVID19 (COVID19 (MODERNA))	65
ANTHRAX (BIOTHRAX)	66													ANTHRAX (NO BRAND NAME)	66													COVID19 (COVID19 (JANSSEN))	66													COVID19 (COVID19 (MODERNA))	66
ANTHRAX (BIOTHRAX)	67													ANTHRAX (NO BRAND NAME)	67													COVID19 (COVID19 (JANSSEN))	67													COVID19 (COVID19 (MODERNA))	67
ANTHRAX (BIOTHRAX)	68													ANTHRAX (NO BRAND NAME)	68													COVID19 (COVID19 (JANSSEN))	68													COVID19 (COVID19 (MODERNA))	68	1			1
ANTHRAX (BIOTHRAX)	69													ANTHRAX (NO BRAND NAME)	69													COVID19 (COVID19 (JANSSEN))	69													COVID19 (COVID19 (MODERNA))	69
ANTHRAX (BIOTHRAX)	70													ANTHRAX (NO BRAND NAME)	70													COVID19 (COVID19 (JANSSEN))	70													COVID19 (COVID19 (MODERNA))	70
ANTHRAX (BIOTHRAX)	71													ANTHRAX (NO BRAND NAME)	71													COVID19 (COVID19 (JANSSEN))	71													COVID19 (COVID19 (MODERNA))	71
ANTHRAX (BIOTHRAX)	72													ANTHRAX (NO BRAND NAME)	72													COVID19 (COVID19 (JANSSEN))	72													COVID19 (COVID19 (MODERNA))	72
ANTHRAX (BIOTHRAX)	73													ANTHRAX (NO BRAND NAME)	73													COVID19 (COVID19 (JANSSEN))	73													COVID19 (COVID19 (MODERNA))	73
ANTHRAX (BIOTHRAX)	74													ANTHRAX (NO BRAND NAME)	74													COVID19 (COVID19 (JANSSEN))	74													COVID19 (COVID19 (MODERNA))	74
ANTHRAX (BIOTHRAX)	75													ANTHRAX (NO BRAND NAME)	75													COVID19 (COVID19 (JANSSEN))	75													COVID19 (COVID19 (MODERNA))	75
ANTHRAX (BIOTHRAX)	76													ANTHRAX (NO BRAND NAME)	76													COVID19 (COVID19 (JANSSEN))	76													COVID19 (COVID19 (MODERNA))	76
ANTHRAX (BIOTHRAX)	77													ANTHRAX (NO BRAND NAME)	77													COVID19 (COVID19 (JANSSEN))	77													COVID19 (COVID19 (MODERNA))	77
ANTHRAX (BIOTHRAX)	78													ANTHRAX (NO BRAND NAME)	78													COVID19 (COVID19 (JANSSEN))	78													COVID19 (COVID19 (MODERNA))	78
ANTHRAX (BIOTHRAX)	79													ANTHRAX (NO BRAND NAME)	79													COVID19 (COVID19 (JANSSEN))	79													COVID19 (COVID19 (MODERNA))	79
ANTHRAX (BIOTHRAX)	80													ANTHRAX (NO BRAND NAME)	80													COVID19 (COVID19 (JANSSEN))	80													COVID19 (COVID19 (MODERNA))	80
ANTHRAX (BIOTHRAX)	81													ANTHRAX (NO BRAND NAME)	81													COVID19 (COVID19 (JANSSEN))	81													COVID19 (COVID19 (MODERNA))	81
ANTHRAX (BIOTHRAX)	82													ANTHRAX (NO BRAND NAME)	82													COVID19 (COVID19 (JANSSEN))	82													COVID19 (COVID19 (MODERNA))	82
ANTHRAX (BIOTHRAX)	83													ANTHRAX (NO BRAND NAME)	83													COVID19 (COVID19 (JANSSEN))	83													COVID19 (COVID19 (MODERNA))	83
ANTHRAX (BIOTHRAX)	84													ANTHRAX (NO BRAND NAME)	84													COVID19 (COVID19 (JANSSEN))	84													COVID19 (COVID19 (MODERNA))	84
ANTHRAX (BIOTHRAX)	85													ANTHRAX (NO BRAND NAME)	85													COVID19 (COVID19 (JANSSEN))	85													COVID19 (COVID19 (MODERNA))	85
ANTHRAX (BIOTHRAX)	86													ANTHRAX (NO BRAND NAME)	86													COVID19 (COVID19 (JANSSEN))	86													COVID19 (COVID19 (MODERNA))	86
ANTHRAX (BIOTHRAX)	87													ANTHRAX (NO BRAND NAME)	87													COVID19 (COVID19 (JANSSEN))	87													COVID19 (COVID19 (MODERNA))	87
ANTHRAX (BIOTHRAX)	88													ANTHRAX (NO BRAND NAME)	88													COVID19 (COVID19 (JANSSEN))	88													COVID19 (COVID19 (MODERNA))	88
ANTHRAX (BIOTHRAX)	89													ANTHRAX (NO BRAND NAME)	89													COVID19 (COVID19 (JANSSEN))	89													COVID19 (COVID19 (MODERNA))	89
ANTHRAX (BIOTHRAX)	90													ANTHRAX (NO BRAND NAME)	90													COVID19 (COVID19 (JANSSEN))	90													COVID19 (COVID19 (MODERNA))	90
ANTHRAX (BIOTHRAX)	91													ANTHRAX (NO BRAND NAME)	91													COVID19 (COVID19 (JANSSEN))	91													COVID19 (COVID19 (MODERNA))	91
ANTHRAX (BIOTHRAX)	92													ANTHRAX (NO BRAND NAME)	92													COVID19 (COVID19 (JANSSEN))	92													COVID19 (COVID19 (MODERNA))	92
ANTHRAX (BIOTHRAX)	93													ANTHRAX (NO BRAND NAME)	93													COVID19 (COVID19 (JANSSEN))	93													COVID19 (COVID19 (MODERNA))	93
ANTHRAX (BIOTHRAX)	94													ANTHRAX (NO BRAND NAME)	94													COVID19 (COVID19 (JANSSEN))	94													COVID19 (COVID19 (MODERNA))	94
ANTHRAX (BIOTHRAX)	95													ANTHRAX (NO BRAND NAME)	95													COVID19 (COVID19 (JANSSEN))	95													COVID19 (COVID19 (MODERNA))	95
ANTHRAX (BIOTHRAX)	96													ANTHRAX (NO BRAND NAME)	96													COVID19 (COVID19 (JANSSEN))	96													COVID19 (COVID19 (MODERNA))	96
ANTHRAX (BIOTHRAX)	97													ANTHRAX (NO BRAND NAME)	97													COVID19 (COVID19 (JANSSEN))	97													COVID19 (COVID19 (MODERNA))	97
ANTHRAX (BIOTHRAX)	98													ANTHRAX (NO BRAND NAME)	98													COVID19 (COVID19 (JANSSEN))	98													COVID19 (COVID19 (MODERNA))	98
ANTHRAX (BIOTHRAX)	99													ANTHRAX (NO BRAND NAME)	99													COVID19 (COVID19 (JANSSEN))	99													COVID19 (COVID19 (MODERNA))	99
ANTHRAX (BIOTHRAX)	100													ANTHRAX (NO BRAND NAME)	100													COVID19 (COVID19 (JANSSEN))	100													COVID19 (COVID19 (MODERNA))	100
ANTHRAX (BIOTHRAX)	101													ANTHRAX (NO BRAND NAME)	101													COVID19 (COVID19 (JANSSEN))	101													COVID19 (COVID19 (MODERNA))	101
ANTHRAX (BIOTHRAX)	102													ANTHRAX (NO BRAND NAME)	102													COVID19 (COVID19 (JANSSEN))	102													COVID19 (COVID19 (MODERNA))	102
ANTHRAX (BIOTHRAX)	103													ANTHRAX (NO BRAND NAME)	103													COVID19 (COVID19 (JANSSEN))	103													COVID19 (COVID19 (MODERNA))	103
ANTHRAX (BIOTHRAX)	104													ANTHRAX (NO BRAND NAME)	104													COVID19 (COVID19 (JANSSEN))	104													COVID19 (COVID19 (MODERNA))	104
ANTHRAX (BIOTHRAX)	105													ANTHRAX (NO BRAND NAME)	105													COVID19 (COVID19 (JANSSEN))	105													COVID19 (COVID19 (MODERNA))	105
ANTHRAX (BIOTHRAX)	106													ANTHRAX (NO BRAND NAME)	106													COVID19 (COVID19 (JANSSEN))	106													COVID19 (COVID19 (MODERNA))	106
ANTHRAX (BIOTHRAX)	107													ANTHRAX (NO BRAND NAME)	107													COVID19 (COVID19 (JANSSEN))	107													COVID19 (COVID19 (MODERNA))	107
ANTHRAX (BIOTHRAX)	108													ANTHRAX (NO BRAND NAME)	108													COVID19 (COVID19 (JANSSEN))	108													COVID19 (COVID19 (MODERNA))	108
ANTHRAX (BIOTHRAX)	109													ANTHRAX (NO BRAND NAME)	109													COVID19 (COVID19 (JANSSEN))	109													COVID19 (COVID19 (MODERNA))	109
ANTHRAX (BIOTHRAX)	110													ANTHRAX (NO BRAND NAME)	110													COVID19 (COVID19 (JANSSEN))	110													COVID19 (COVID19 (MODERNA))	110
ANTHRAX (BIOTHRAX)	111													ANTHRAX (NO BRAND NAME)	111													COVID19 (COVID19 (JANSSEN))	111													COVID19 (COVID19 (MODERNA))	111
ANTHRAX (BIOTHRAX)	112													ANTHRAX (NO BRAND NAME)	112													COVID19 (COVID19 (JANSSEN))	112													COVID19 (COVID19 (MODERNA))	112
ANTHRAX (BIOTHRAX)	113													ANTHRAX (NO BRAND NAME)	113													COVID19 (COVID19 (JANSSEN))	113													COVID19 (COVID19 (MODERNA))	113
ANTHRAX (BIOTHRAX)	114													ANTHRAX (NO BRAND NAME)	114													COVID19 (COVID19 (JANSSEN))	114													COVID19 (COVID19 (MODERNA))	114
ANTHRAX (BIOTHRAX)	115													ANTHRAX (NO BRAND NAME)	115													COVID19 (COVID19 (JANSSEN))	115													COVID19 (COVID19 (MODERNA))	115
ANTHRAX (BIOTHRAX)	116													ANTHRAX (NO BRAND NAME)	116													COVID19 (COVID19 (JANSSEN))	116													COVID19 (COVID19 (MODERNA))	116
ANTHRAX (BIOTHRAX)	117													ANTHRAX (NO BRAND NAME)	117													COVID19 (COVID19 (JANSSEN))	117													COVID19 (COVID19 (MODERNA))	117
ANTHRAX (BIOTHRAX)	118													ANTHRAX (NO BRAND NAME)	118													COVID19 (COVID19 (JANSSEN))	118													COVID19 (COVID19 (MODERNA))	118
ANTHRAX (BIOTHRAX)	119													ANTHRAX (NO BRAND NAME)	119													COVID19 (COVID19 (JANSSEN))	119													COVID19 (COVID19 (MODERNA))	119
ANTHRAX (BIOTHRAX)	120													ANTHRAX (NO BRAND NAME)	120													COVID19 (COVID19 (JANSSEN))	120													COVID19 (COVID19 (MODERNA))	120
Onset report
ANTHRAX (BIOTHRAX)	Onset	All	1	2	3	All Male	1 Male	2 Male	3 Male	All Female	1 Female	2 Female	3 Female	ANTHRAX (NO BRAND NAME)	Onset	All	1	2	3	All Male	1 Male	2 Male	3 Male	All Female	1 Female	2 Female	3 Female	COVID19 (COVID19 (JANSSEN))	Onset	All	1	2	3	All Male	1 Male	2 Male	3 Male	All Female	1 Female	2 Female	3 Female	COVID19 (COVID19 (MODERNA))	Onset	All	1	2	3	All Male	1 Male
ANTHRAX (BIOTHRAX)	0	2	2							2	2			ANTHRAX (NO BRAND NAME)	0	1	1							1	1			COVID19 (COVID19 (JANSSEN))	0	88	42							88	42			COVID19 (COVID19 (MODERNA))	0	284	146	92	5
ANTHRAX (BIOTHRAX)	1	2		1						2		1		ANTHRAX (NO BRAND NAME)	1													COVID19 (COVID19 (JANSSEN))	1	46	36							46	36			COVID19 (COVID19 (MODERNA))	1	197	97	75	2	1
ANTHRAX (BIOTHRAX)	2	1								1				ANTHRAX (NO BRAND NAME)	2													COVID19 (COVID19 (JANSSEN))	2	24	17			2	2			22	15			COVID19 (COVID19 (MODERNA))	2	89	42	40		1	1
ANTHRAX (BIOTHRAX)	3													ANTHRAX (NO BRAND NAME)	3													COVID19 (COVID19 (JANSSEN))	3	18	15							18	15			COVID19 (COVID19 (MODERNA))	3	51	34	14
ANTHRAX (BIOTHRAX)	4													ANTHRAX (NO BRAND NAME)	4													COVID19 (COVID19 (JANSSEN))	4	14	11							14	11			COVID19 (COVID19 (MODERNA))	4	36	23	7
ANTHRAX (BIOTHRAX)	5													ANTHRAX (NO BRAND NAME)	5	1		1						1		1		COVID19 (COVID19 (JANSSEN))	5	5	2							5	2			COVID19 (COVID19 (MODERNA))	5	32	14	15		1
ANTHRAX (BIOTHRAX)	6	1								1				ANTHRAX (NO BRAND NAME)	6													COVID19 (COVID19 (JANSSEN))	6	7	7							7	7			COVID19 (COVID19 (MODERNA))	6	24	13	6
ANTHRAX (BIOTHRAX)	7													ANTHRAX (NO BRAND NAME)	7													COVID19 (COVID19 (JANSSEN))	7	6	5							6	5			COVID19 (COVID19 (MODERNA))	7	48	27	14	1
ANTHRAX (BIOTHRAX)	8													ANTHRAX (NO BRAND NAME)	8													COVID19 (COVID19 (JANSSEN))	8	3	3							3	3			COVID19 (COVID19 (MODERNA))	8	21	10	7
ANTHRAX (BIOTHRAX)	9													ANTHRAX (NO BRAND NAME)	9													COVID19 (COVID19 (JANSSEN))	9	9	7							9	7			COVID19 (COVID19 (MODERNA))	9	13	7	3
ANTHRAX (BIOTHRAX)	10													ANTHRAX (NO BRAND NAME)	10													COVID19 (COVID19 (JANSSEN))	10	2	2							2	2			COVID19 (COVID19 (MODERNA))	10	21	7	9
ANTHRAX (BIOTHRAX)	11													ANTHRAX (NO BRAND NAME)	11													COVID19 (COVID19 (JANSSEN))	11	6	5							6	5			COVID19 (COVID19 (MODERNA))	11	16	7	6
ANTHRAX (BIOTHRAX)	12													ANTHRAX (NO BRAND NAME)	12													COVID19 (COVID19 (JANSSEN))	12													COVID19 (COVID19 (MODERNA))	12	13	6	6
ANTHRAX (BIOTHRAX)	13													ANTHRAX (NO BRAND NAME)	13													COVID19 (COVID19 (JANSSEN))	13	2	2							2	2			COVID19 (COVID19 (MODERNA))	13	16	7	8
ANTHRAX (BIOTHRAX)	14													ANTHRAX (NO BRAND NAME)	14													COVID19 (COVID19 (JANSSEN))	14	6	5							6	5			COVID19 (COVID19 (MODERNA))	14	28	16	8
ANTHRAX (BIOTHRAX)	15													ANTHRAX (NO BRAND NAME)	15													COVID19 (COVID19 (JANSSEN))	15	2	1							2	1			COVID19 (COVID19 (MODERNA))	15	14	5	9
ANTHRAX (BIOTHRAX)	16													ANTHRAX (NO BRAND NAME)	16													COVID19 (COVID19 (JANSSEN))	16	1	1							1	1			COVID19 (COVID19 (MODERNA))	16	21	13	6
ANTHRAX (BIOTHRAX)	17													ANTHRAX (NO BRAND NAME)	17													COVID19 (COVID19 (JANSSEN))	17	1								1				COVID19 (COVID19 (MODERNA))	17	12	7	5
ANTHRAX (BIOTHRAX)	18													ANTHRAX (NO BRAND NAME)	18													COVID19 (COVID19 (JANSSEN))	18	2								2				COVID19 (COVID19 (MODERNA))	18	19	5	12
ANTHRAX (BIOTHRAX)	19													ANTHRAX (NO BRAND NAME)	19													COVID19 (COVID19 (JANSSEN))	19	4	3							4	3			COVID19 (COVID19 (MODERNA))	19	11	5	3
ANTHRAX (BIOTHRAX)	20													ANTHRAX (NO BRAND NAME)	20													COVID19 (COVID19 (JANSSEN))	20	4	3							4	3			COVID19 (COVID19 (MODERNA))	20	7	3	3
ANTHRAX (BIOTHRAX)	21													ANTHRAX (NO BRAND NAME)	21													COVID19 (COVID19 (JANSSEN))	21	2	2							2	2			COVID19 (COVID19 (MODERNA))	21	9	5	4
ANTHRAX (BIOTHRAX)	22													ANTHRAX (NO BRAND NAME)	22													COVID19 (COVID19 (JANSSEN))	22	5	5							5	5			COVID19 (COVID19 (MODERNA))	22	11	6	4
ANTHRAX (BIOTHRAX)	23													ANTHRAX (NO BRAND NAME)	23													COVID19 (COVID19 (JANSSEN))	23	3	1							3	1			COVID19 (COVID19 (MODERNA))	23	10	6	3
ANTHRAX (BIOTHRAX)	24													ANTHRAX (NO BRAND NAME)	24													COVID19 (COVID19 (JANSSEN))	24	1	1							1	1			COVID19 (COVID19 (MODERNA))	24	22	8	9
ANTHRAX (BIOTHRAX)	25													ANTHRAX (NO BRAND NAME)	25													COVID19 (COVID19 (JANSSEN))	25	5	4							5	4			COVID19 (COVID19 (MODERNA))	25	7	2	4
ANTHRAX (BIOTHRAX)	26													ANTHRAX (NO BRAND NAME)	26													COVID19 (COVID19 (JANSSEN))	26	1								1				COVID19 (COVID19 (MODERNA))	26	2	1	1
ANTHRAX (BIOTHRAX)	27													ANTHRAX (NO BRAND NAME)	27	1	1							1	1			COVID19 (COVID19 (JANSSEN))	27	3	3							3	3			COVID19 (COVID19 (MODERNA))	27	3	1	1
ANTHRAX (BIOTHRAX)	28													ANTHRAX (NO BRAND NAME)	28													COVID19 (COVID19 (JANSSEN))	28	2	2							2	2			COVID19 (COVID19 (MODERNA))	28	21	10	10
ANTHRAX (BIOTHRAX)	29													ANTHRAX (NO BRAND NAME)	29													COVID19 (COVID19 (JANSSEN))	29													COVID19 (COVID19 (MODERNA))	29	11	6	4
ANTHRAX (BIOTHRAX)	30													ANTHRAX (NO BRAND NAME)	30													COVID19 (COVID19 (JANSSEN))	30	4	3							4	3			COVID19 (COVID19 (MODERNA))	30	4	2	2
ANTHRAX (BIOTHRAX)	31													ANTHRAX (NO BRAND NAME)	31													COVID19 (COVID19 (JANSSEN))	31	4	3	1						4	3	1		COVID19 (COVID19 (MODERNA))	31	16	4	10
ANTHRAX (BIOTHRAX)	32													ANTHRAX (NO BRAND NAME)	32													COVID19 (COVID19 (JANSSEN))	32													COVID19 (COVID19 (MODERNA))	32	4	1	3
ANTHRAX (BIOTHRAX)	33													ANTHRAX (NO BRAND NAME)	33													COVID19 (COVID19 (JANSSEN))	33	3	2							3	2			COVID19 (COVID19 (MODERNA))	33	10	3	7
ANTHRAX (BIOTHRAX)	34													ANTHRAX (NO BRAND NAME)	34													COVID19 (COVID19 (JANSSEN))	34	2	1							2	1			COVID19 (COVID19 (MODERNA))	34	8	3	5
ANTHRAX (BIOTHRAX)	35													ANTHRAX (NO BRAND NAME)	35													COVID19 (COVID19 (JANSSEN))	35													COVID19 (COVID19 (MODERNA))	35	4	2	2
ANTHRAX (BIOTHRAX)	36													ANTHRAX (NO BRAND NAME)	36													COVID19 (COVID19 (JANSSEN))	36	1	1							1	1			COVID19 (COVID19 (MODERNA))	36	4	1	2
ANTHRAX (BIOTHRAX)	37													ANTHRAX (NO BRAND NAME)	37													COVID19 (COVID19 (JANSSEN))	37													COVID19 (COVID19 (MODERNA))	37	5	2	3
ANTHRAX (BIOTHRAX)	38													ANTHRAX (NO BRAND NAME)	38													COVID19 (COVID19 (JANSSEN))	38	1								1				COVID19 (COVID19 (MODERNA))	38
ANTHRAX (BIOTHRAX)	39													ANTHRAX (NO BRAND NAME)	39													COVID19 (COVID19 (JANSSEN))	39	1	1							1	1			COVID19 (COVID19 (MODERNA))	39	5	3	1
ANTHRAX (BIOTHRAX)	40													ANTHRAX (NO BRAND NAME)	40													COVID19 (COVID19 (JANSSEN))	40	1	1							1	1			COVID19 (COVID19 (MODERNA))	40	5	2	2
ANTHRAX (BIOTHRAX)	41													ANTHRAX (NO BRAND NAME)	41													COVID19 (COVID19 (JANSSEN))	41													COVID19 (COVID19 (MODERNA))	41	7	2	5
ANTHRAX (BIOTHRAX)	42													ANTHRAX (NO BRAND NAME)	42													COVID19 (COVID19 (JANSSEN))	42	1	1							1	1			COVID19 (COVID19 (MODERNA))	42
ANTHRAX (BIOTHRAX)	43													ANTHRAX (NO BRAND NAME)	43													COVID19 (COVID19 (JANSSEN))	43	2	2							2	2			COVID19 (COVID19 (MODERNA))	43	3	1	1
ANTHRAX (BIOTHRAX)	44													ANTHRAX (NO BRAND NAME)	44													COVID19 (COVID19 (JANSSEN))	44	2	2							2	2			COVID19 (COVID19 (MODERNA))	44	1		1
ANTHRAX (BIOTHRAX)	45													ANTHRAX (NO BRAND NAME)	45													COVID19 (COVID19 (JANSSEN))	45	2	1							2	1			COVID19 (COVID19 (MODERNA))	45	1	1
ANTHRAX (BIOTHRAX)	46													ANTHRAX (NO BRAND NAME)	46													COVID19 (COVID19 (JANSSEN))	46	1	1							1	1			COVID19 (COVID19 (MODERNA))	46	2		2
ANTHRAX (BIOTHRAX)	47													ANTHRAX (NO BRAND NAME)	47													COVID19 (COVID19 (JANSSEN))	47	1	1							1	1			COVID19 (COVID19 (MODERNA))	47
ANTHRAX (BIOTHRAX)	48													ANTHRAX (NO BRAND NAME)	48													COVID19 (COVID19 (JANSSEN))	48													COVID19 (COVID19 (MODERNA))	48	4	1	2		1
ANTHRAX (BIOTHRAX)	49													ANTHRAX (NO BRAND NAME)	49													COVID19 (COVID19 (JANSSEN))	49													COVID19 (COVID19 (MODERNA))	49	3	2	1
ANTHRAX (BIOTHRAX)	50													ANTHRAX (NO BRAND NAME)	50													COVID19 (COVID19 (JANSSEN))	50													COVID19 (COVID19 (MODERNA))	50
ANTHRAX (BIOTHRAX)	51													ANTHRAX (NO BRAND NAME)	51													COVID19 (COVID19 (JANSSEN))	51	1	1							1	1			COVID19 (COVID19 (MODERNA))	51	2		2
ANTHRAX (BIOTHRAX)	52													ANTHRAX (NO BRAND NAME)	52													COVID19 (COVID19 (JANSSEN))	52													COVID19 (COVID19 (MODERNA))	52	1		1
ANTHRAX (BIOTHRAX)	53													ANTHRAX (NO BRAND NAME)	53													COVID19 (COVID19 (JANSSEN))	53	1								1				COVID19 (COVID19 (MODERNA))	53	1		1
ANTHRAX (BIOTHRAX)	54													ANTHRAX (NO BRAND NAME)	54													COVID19 (COVID19 (JANSSEN))	54	2	2							2	2			COVID19 (COVID19 (MODERNA))	54	2	1	1
ANTHRAX (BIOTHRAX)	55													ANTHRAX (NO BRAND NAME)	55													COVID19 (COVID19 (JANSSEN))	55	1	1							1	1			COVID19 (COVID19 (MODERNA))	55	2	1	1
ANTHRAX (BIOTHRAX)	56													ANTHRAX (NO BRAND NAME)	56													COVID19 (COVID19 (JANSSEN))	56	1	1							1	1			COVID19 (COVID19 (MODERNA))	56	1	1
ANTHRAX (BIOTHRAX)	57													ANTHRAX (NO BRAND NAME)	57													COVID19 (COVID19 (JANSSEN))	57													COVID19 (COVID19 (MODERNA))	57	3	1	2
ANTHRAX (BIOTHRAX)	58													ANTHRAX (NO BRAND NAME)	58													COVID19 (COVID19 (JANSSEN))	58	1	1							1	1			COVID19 (COVID19 (MODERNA))	58	1		1
ANTHRAX (BIOTHRAX)	59													ANTHRAX (NO BRAND NAME)	59													COVID19 (COVID19 (JANSSEN))	59													COVID19 (COVID19 (MODERNA))	59	5	3	2
ANTHRAX (BIOTHRAX)	60													ANTHRAX (NO BRAND NAME)	60													COVID19 (COVID19 (JANSSEN))	60													COVID19 (COVID19 (MODERNA))	60	7	2	3
ANTHRAX (BIOTHRAX)	61													ANTHRAX (NO BRAND NAME)	61													COVID19 (COVID19 (JANSSEN))	61	2	1			1				1	1			COVID19 (COVID19 (MODERNA))	61	4	1	3
ANTHRAX (BIOTHRAX)	62													ANTHRAX (NO BRAND NAME)	62													COVID19 (COVID19 (JANSSEN))	62													COVID19 (COVID19 (MODERNA))	62	1		1
ANTHRAX (BIOTHRAX)	63													ANTHRAX (NO BRAND NAME)	63													COVID19 (COVID19 (JANSSEN))	63													COVID19 (COVID19 (MODERNA))	63	1	1
ANTHRAX (BIOTHRAX)	64													ANTHRAX (NO BRAND NAME)	64													COVID19 (COVID19 (JANSSEN))	64													COVID19 (COVID19 (MODERNA))	64	4	2	2
ANTHRAX (BIOTHRAX)	65													ANTHRAX (NO BRAND NAME)	65													COVID19 (COVID19 (JANSSEN))	65													COVID19 (COVID19 (MODERNA))	65	4	2	2
ANTHRAX (BIOTHRAX)	66													ANTHRAX (NO BRAND NAME)	66													COVID19 (COVID19 (JANSSEN))	66													COVID19 (COVID19 (MODERNA))	66	2	1	1
ANTHRAX (BIOTHRAX)	67													ANTHRAX (NO BRAND NAME)	67													COVID19 (COVID19 (JANSSEN))	67													COVID19 (COVID19 (MODERNA))	67
ANTHRAX (BIOTHRAX)	68													ANTHRAX (NO BRAND NAME)	68													COVID19 (COVID19 (JANSSEN))	68													COVID19 (COVID19 (MODERNA))	68
ANTHRAX (BIOTHRAX)	69													ANTHRAX (NO BRAND NAME)	69													COVID19 (COVID19 (JANSSEN))	69	1	1							1	1			COVID19 (COVID19 (MODERNA))	69	3	2	1
ANTHRAX (BIOTHRAX)	70													ANTHRAX (NO BRAND NAME)	70													COVID19 (COVID19 (JANSSEN))	70													COVID19 (COVID19 (MODERNA))	70	2	1	1
ANTHRAX (BIOTHRAX)	71													ANTHRAX (NO BRAND NAME)	71													COVID19 (COVID19 (JANSSEN))	71	1	1							1	1			COVID19 (COVID19 (MODERNA))	71	1	1
ANTHRAX (BIOTHRAX)	72													ANTHRAX (NO BRAND NAME)	72													COVID19 (COVID19 (JANSSEN))	72													COVID19 (COVID19 (MODERNA))	72
ANTHRAX (BIOTHRAX)	73													ANTHRAX (NO BRAND NAME)	73													COVID19 (COVID19 (JANSSEN))	73													COVID19 (COVID19 (MODERNA))	73	2	1	1
ANTHRAX (BIOTHRAX)	74													ANTHRAX (NO BRAND NAME)	74													COVID19 (COVID19 (JANSSEN))	74	1	1							1	1			COVID19 (COVID19 (MODERNA))	74	1		1
ANTHRAX (BIOTHRAX)	75													ANTHRAX (NO BRAND NAME)	75													COVID19 (COVID19 (JANSSEN))	75													COVID19 (COVID19 (MODERNA))	75
ANTHRAX (BIOTHRAX)	76													ANTHRAX (NO BRAND NAME)	76													COVID19 (COVID19 (JANSSEN))	76													COVID19 (COVID19 (MODERNA))	76
ANTHRAX (BIOTHRAX)	77													ANTHRAX (NO BRAND NAME)	77													COVID19 (COVID19 (JANSSEN))	77													COVID19 (COVID19 (MODERNA))	77	4	2	2
ANTHRAX (BIOTHRAX)	78													ANTHRAX (NO BRAND NAME)	78													COVID19 (COVID19 (JANSSEN))	78													COVID19 (COVID19 (MODERNA))	78	3	2	1
ANTHRAX (BIOTHRAX)	79													ANTHRAX (NO BRAND NAME)	79													COVID19 (COVID19 (JANSSEN))	79													COVID19 (COVID19 (MODERNA))	79	2	2
ANTHRAX (BIOTHRAX)	80													ANTHRAX (NO BRAND NAME)	80													COVID19 (COVID19 (JANSSEN))	80													COVID19 (COVID19 (MODERNA))	80
ANTHRAX (BIOTHRAX)	81													ANTHRAX (NO BRAND NAME)	81													COVID19 (COVID19 (JANSSEN))	81													COVID19 (COVID19 (MODERNA))	81	1		1
ANTHRAX (BIOTHRAX)	82													ANTHRAX (NO BRAND NAME)	82													COVID19 (COVID19 (JANSSEN))	82													COVID19 (COVID19 (MODERNA))	82
ANTHRAX (BIOTHRAX)	83													ANTHRAX (NO BRAND NAME)	83													COVID19 (COVID19 (JANSSEN))	83													COVID19 (COVID19 (MODERNA))	83	1	1
ANTHRAX (BIOTHRAX)	84													ANTHRAX (NO BRAND NAME)	84													COVID19 (COVID19 (JANSSEN))	84													COVID19 (COVID19 (MODERNA))	84
ANTHRAX (BIOTHRAX)	85													ANTHRAX (NO BRAND NAME)	85													COVID19 (COVID19 (JANSSEN))	85													COVID19 (COVID19 (MODERNA))	85	2	2
ANTHRAX (BIOTHRAX)	86													ANTHRAX (NO BRAND NAME)	86													COVID19 (COVID19 (JANSSEN))	86													COVID19 (COVID19 (MODERNA))	86
ANTHRAX (BIOTHRAX)	87													ANTHRAX (NO BRAND NAME)	87													COVID19 (COVID19 (JANSSEN))	87													COVID19 (COVID19 (MODERNA))	87
ANTHRAX (BIOTHRAX)	88													ANTHRAX (NO BRAND NAME)	88													COVID19 (COVID19 (JANSSEN))	88	1	1							1	1			COVID19 (COVID19 (MODERNA))	88
ANTHRAX (BIOTHRAX)	89													ANTHRAX (NO BRAND NAME)	89													COVID19 (COVID19 (JANSSEN))	89	1	1							1	1			COVID19 (COVID19 (MODERNA))	89
ANTHRAX (BIOTHRAX)	90													ANTHRAX (NO BRAND NAME)	90													COVID19 (COVID19 (JANSSEN))	90													COVID19 (COVID19 (MODERNA))	90	2	1	1
ANTHRAX (BIOTHRAX)	91													ANTHRAX (NO BRAND NAME)	91													COVID19 (COVID19 (JANSSEN))	91													COVID19 (COVID19 (MODERNA))	91
ANTHRAX (BIOTHRAX)	92													ANTHRAX (NO BRAND NAME)	92													COVID19 (COVID19 (JANSSEN))	92	2	1							2	1			COVID19 (COVID19 (MODERNA))	92	1		1
ANTHRAX (BIOTHRAX)	93													ANTHRAX (NO BRAND NAME)	93													COVID19 (COVID19 (JANSSEN))	93													COVID19 (COVID19 (MODERNA))	93	3	1	2
ANTHRAX (BIOTHRAX)	94													ANTHRAX (NO BRAND NAME)	94													COVID19 (COVID19 (JANSSEN))	94													COVID19 (COVID19 (MODERNA))	94
ANTHRAX (BIOTHRAX)	95													ANTHRAX (NO BRAND NAME)	95													COVID19 (COVID19 (JANSSEN))	95													COVID19 (COVID19 (MODERNA))	95
ANTHRAX (BIOTHRAX)	96													ANTHRAX (NO BRAND NAME)	96													COVID19 (COVID19 (JANSSEN))	96													COVID19 (COVID19 (MODERNA))	96
ANTHRAX (BIOTHRAX)	97													ANTHRAX (NO BRAND NAME)	97													COVID19 (COVID19 (JANSSEN))	97													COVID19 (COVID19 (MODERNA))	97
ANTHRAX (BIOTHRAX)	98													ANTHRAX (NO BRAND NAME)	98													COVID19 (COVID19 (JANSSEN))	98													COVID19 (COVID19 (MODERNA))	98
ANTHRAX (BIOTHRAX)	99													ANTHRAX (NO BRAND NAME)	99													COVID19 (COVID19 (JANSSEN))	99													COVID19 (COVID19 (MODERNA))	99
ANTHRAX (BIOTHRAX)	100													ANTHRAX (NO BRAND NAME)	100													COVID19 (COVID19 (JANSSEN))	100													COVID19 (COVID19 (MODERNA))	100
ANTHRAX (BIOTHRAX)	101													ANTHRAX (NO BRAND NAME)	101													COVID19 (COVID19 (JANSSEN))	101													COVID19 (COVID19 (MODERNA))	101	2		2
ANTHRAX (BIOTHRAX)	102													ANTHRAX (NO BRAND NAME)	102													COVID19 (COVID19 (JANSSEN))	102													COVID19 (COVID19 (MODERNA))	102
ANTHRAX (BIOTHRAX)	103													ANTHRAX (NO BRAND NAME)	103													COVID19 (COVID19 (JANSSEN))	103													COVID19 (COVID19 (MODERNA))	103
ANTHRAX (BIOTHRAX)	104													ANTHRAX (NO BRAND NAME)	104													COVID19 (COVID19 (JANSSEN))	104													COVID19 (COVID19 (MODERNA))	104	2	1	1
ANTHRAX (BIOTHRAX)	105													ANTHRAX (NO BRAND NAME)	105													COVID19 (COVID19 (JANSSEN))	105													COVID19 (COVID19 (MODERNA))	105
ANTHRAX (BIOTHRAX)	106													ANTHRAX (NO BRAND NAME)	106													COVID19 (COVID19 (JANSSEN))	106													COVID19 (COVID19 (MODERNA))	106	1		1
ANTHRAX (BIOTHRAX)	107													ANTHRAX (NO BRAND NAME)	107													COVID19 (COVID19 (JANSSEN))	107													COVID19 (COVID19 (MODERNA))	107
ANTHRAX (BIOTHRAX)	108													ANTHRAX (NO BRAND NAME)	108													COVID19 (COVID19 (JANSSEN))	108													COVID19 (COVID19 (MODERNA))	108
ANTHRAX (BIOTHRAX)	109													ANTHRAX (NO BRAND NAME)	109													COVID19 (COVID19 (JANSSEN))	109													COVID19 (COVID19 (MODERNA))	109
ANTHRAX (BIOTHRAX)	110													ANTHRAX (NO BRAND NAME)	110													COVID19 (COVID19 (JANSSEN))	110													COVID19 (COVID19 (MODERNA))	110	1		1
ANTHRAX (BIOTHRAX)	111													ANTHRAX (NO BRAND NAME)	111													COVID19 (COVID19 (JANSSEN))	111													COVID19 (COVID19 (MODERNA))	111	1	1
ANTHRAX (BIOTHRAX)	112													ANTHRAX (NO BRAND NAME)	112													COVID19 (COVID19 (JANSSEN))	112													COVID19 (COVID19 (MODERNA))	112	1	1
ANTHRAX (BIOTHRAX)	113													ANTHRAX (NO BRAND NAME)	113	1	1							1	1			COVID19 (COVID19 (JANSSEN))	113													COVID19 (COVID19 (MODERNA))	113
ANTHRAX (BIOTHRAX)	114													ANTHRAX (NO BRAND NAME)	114													COVID19 (COVID19 (JANSSEN))	114													COVID19 (COVID19 (MODERNA))	114	3	1	2
ANTHRAX (BIOTHRAX)	115													ANTHRAX (NO BRAND NAME)	115													COVID19 (COVID19 (JANSSEN))	115													COVID19 (COVID19 (MODERNA))	115
ANTHRAX (BIOTHRAX)	116													ANTHRAX (NO BRAND NAME)	116													COVID19 (COVID19 (JANSSEN))	116													COVID19 (COVID19 (MODERNA))	116
ANTHRAX (BIOTHRAX)	117													ANTHRAX (NO BRAND NAME)	117													COVID19 (COVID19 (JANSSEN))	117													COVID19 (COVID19 (MODERNA))	117
ANTHRAX (BIOTHRAX)	118													ANTHRAX (NO BRAND NAME)	118													COVID19 (COVID19 (JANSSEN))	118													COVID19 (COVID19 (MODERNA))	118
ANTHRAX (BIOTHRAX)	119													ANTHRAX (NO BRAND NAME)	119													COVID19 (COVID19 (JANSSEN))	119													COVID19 (COVID19 (MODERNA))	119
ANTHRAX (BIOTHRAX)	120													ANTHRAX (NO BRAND NAME)	120													COVID19 (COVID19 (JANSSEN))	120													COVID19 (COVID19 (MODERNA))	120	1
[truncated: 636 more columns]

## Sheet: All_premenstrual_pain
Dose report
Vaccine	All	1	2	3	4	5	6	7+	UNK	N/A
COVID19 (COVID19 (PFIZER-BIONTECH))	134	84	43	1					6
COVID19 (COVID19 (MODERNA))	30	19	10						1
COVID19 (COVID19 (JANSSEN))	2	1							1
ZOSTER (SHINGRIX)	1	1
HPV (GARDASIL 9)	1	1
VACCINE NOT SPECIFIED (NO BRAND NAME)	1								1
Total	169
COVID-19	166
COVID-19 %	0.982249
Age report
COVID19 (COVID19 (JANSSEN))	Age	All	1	2	3	All Male	1 Male	2 Male	3 Male	All Female	1 Female	2 Female	3 Female	COVID19 (COVID19 (MODERNA))	Age	All	1	2	3	All Male	1 Male	2 Male	3 Male	All Female	1 Female	2 Female	3 Female	COVID19 (COVID19 (PFIZER-BIONTECH))	Age	All	1	2	3	All Male	1 Male	2 Male	3 Male	All Female	1 Female	2 Female	3 Female	HPV (GARDASIL 9)	Age	All	1	2	3	All Male	1 Male
COVID19 (COVID19 (JANSSEN))	0	1								1				COVID19 (COVID19 (MODERNA))	0	5	4	1						5	4	1		COVID19 (COVID19 (PFIZER-BIONTECH))	0	89	59	26	1					88	58	26	1	HPV (GARDASIL 9)	0	1	1
COVID19 (COVID19 (JANSSEN))	1													COVID19 (COVID19 (MODERNA))	1													COVID19 (COVID19 (PFIZER-BIONTECH))	1													HPV (GARDASIL 9)	1
COVID19 (COVID19 (JANSSEN))	2													COVID19 (COVID19 (MODERNA))	2													COVID19 (COVID19 (PFIZER-BIONTECH))	2													HPV (GARDASIL 9)	2
COVID19 (COVID19 (JANSSEN))	3													COVID19 (COVID19 (MODERNA))	3													COVID19 (COVID19 (PFIZER-BIONTECH))	3													HPV (GARDASIL 9)	3
COVID19 (COVID19 (JANSSEN))	4													COVID19 (COVID19 (MODERNA))	4													COVID19 (COVID19 (PFIZER-BIONTECH))	4													HPV (GARDASIL 9)	4
COVID19 (COVID19 (JANSSEN))	5													COVID19 (COVID19 (MODERNA))	5													COVID19 (COVID19 (PFIZER-BIONTECH))	5													HPV (GARDASIL 9)	5
COVID19 (COVID19 (JANSSEN))	6													COVID19 (COVID19 (MODERNA))	6													COVID19 (COVID19 (PFIZER-BIONTECH))	6													HPV (GARDASIL 9)	6
COVID19 (COVID19 (JANSSEN))	7													COVID19 (COVID19 (MODERNA))	7													COVID19 (COVID19 (PFIZER-BIONTECH))	7													HPV (GARDASIL 9)	7
COVID19 (COVID19 (JANSSEN))	8													COVID19 (COVID19 (MODERNA))	8													COVID19 (COVID19 (PFIZER-BIONTECH))	8													HPV (GARDASIL 9)	8
COVID19 (COVID19 (JANSSEN))	9													COVID19 (COVID19 (MODERNA))	9													COVID19 (COVID19 (PFIZER-BIONTECH))	9													HPV (GARDASIL 9)	9
COVID19 (COVID19 (JANSSEN))	10													COVID19 (COVID19 (MODERNA))	10													COVID19 (COVID19 (PFIZER-BIONTECH))	10													HPV (GARDASIL 9)	10
COVID19 (COVID19 (JANSSEN))	11													COVID19 (COVID19 (MODERNA))	11													COVID19 (COVID19 (PFIZER-BIONTECH))	11													HPV (GARDASIL 9)	11
COVID19 (COVID19 (JANSSEN))	12													COVID19 (COVID19 (MODERNA))	12													COVID19 (COVID19 (PFIZER-BIONTECH))	12													HPV (GARDASIL 9)	12
COVID19 (COVID19 (JANSSEN))	13													COVID19 (COVID19 (MODERNA))	13													COVID19 (COVID19 (PFIZER-BIONTECH))	13													HPV (GARDASIL 9)	13
COVID19 (COVID19 (JANSSEN))	14													COVID19 (COVID19 (MODERNA))	14													COVID19 (COVID19 (PFIZER-BIONTECH))	14													HPV (GARDASIL 9)	14
COVID19 (COVID19 (JANSSEN))	15													COVID19 (COVID19 (MODERNA))	15													COVID19 (COVID19 (PFIZER-BIONTECH))	15													HPV (GARDASIL 9)	15
COVID19 (COVID19 (JANSSEN))	16													COVID19 (COVID19 (MODERNA))	16													COVID19 (COVID19 (PFIZER-BIONTECH))	16													HPV (GARDASIL 9)	16
COVID19 (COVID19 (JANSSEN))	17													COVID19 (COVID19 (MODERNA))	17													COVID19 (COVID19 (PFIZER-BIONTECH))	17													HPV (GARDASIL 9)	17
COVID19 (COVID19 (JANSSEN))	18													COVID19 (COVID19 (MODERNA))	18													COVID19 (COVID19 (PFIZER-BIONTECH))	18													HPV (GARDASIL 9)	18
COVID19 (COVID19 (JANSSEN))	19													COVID19 (COVID19 (MODERNA))	19													COVID19 (COVID19 (PFIZER-BIONTECH))	19													HPV (GARDASIL 9)	19
COVID19 (COVID19 (JANSSEN))	20													COVID19 (COVID19 (MODERNA))	20													COVID19 (COVID19 (PFIZER-BIONTECH))	20													HPV (GARDASIL 9)	20
COVID19 (COVID19 (JANSSEN))	21													COVID19 (COVID19 (MODERNA))	21													COVID19 (COVID19 (PFIZER-BIONTECH))	21													HPV (GARDASIL 9)	21
COVID19 (COVID19 (JANSSEN))	22													COVID19 (COVID19 (MODERNA))	22													COVID19 (COVID19 (PFIZER-BIONTECH))	22													HPV (GARDASIL 9)	22
COVID19 (COVID19 (JANSSEN))	23													COVID19 (COVID19 (MODERNA))	23	1	1							1	1			COVID19 (COVID19 (PFIZER-BIONTECH))	23	4	3	1						4	3	1		HPV (GARDASIL 9)	23
COVID19 (COVID19 (JANSSEN))	24													COVID19 (COVID19 (MODERNA))	24	1	1							1	1			COVID19 (COVID19 (PFIZER-BIONTECH))	24													HPV (GARDASIL 9)	24
COVID19 (COVID19 (JANSSEN))	25													COVID19 (COVID19 (MODERNA))	25													COVID19 (COVID19 (PFIZER-BIONTECH))	25	5	1	4						5	1	4		HPV (GARDASIL 9)	25
COVID19 (COVID19 (JANSSEN))	26													COVID19 (COVID19 (MODERNA))	26													COVID19 (COVID19 (PFIZER-BIONTECH))	26													HPV (GARDASIL 9)	26
COVID19 (COVID19 (JANSSEN))	27													COVID19 (COVID19 (MODERNA))	27	6	4	2						6	4	2		COVID19 (COVID19 (PFIZER-BIONTECH))	27	2	2							2	2			HPV (GARDASIL 9)	27
COVID19 (COVID19 (JANSSEN))	28													COVID19 (COVID19 (MODERNA))	28													COVID19 (COVID19 (PFIZER-BIONTECH))	28													HPV (GARDASIL 9)	28
COVID19 (COVID19 (JANSSEN))	29													COVID19 (COVID19 (MODERNA))	29	2		2						2		2		COVID19 (COVID19 (PFIZER-BIONTECH))	29	3	2	1						3	2	1		HPV (GARDASIL 9)	29
COVID19 (COVID19 (JANSSEN))	30													COVID19 (COVID19 (MODERNA))	30	2	2							2	2			COVID19 (COVID19 (PFIZER-BIONTECH))	30	4	2	1						4	2	1		HPV (GARDASIL 9)	30
COVID19 (COVID19 (JANSSEN))	31													COVID19 (COVID19 (MODERNA))	31													COVID19 (COVID19 (PFIZER-BIONTECH))	31	1		1						1		1		HPV (GARDASIL 9)	31
COVID19 (COVID19 (JANSSEN))	32													COVID19 (COVID19 (MODERNA))	32													COVID19 (COVID19 (PFIZER-BIONTECH))	32													HPV (GARDASIL 9)	32
COVID19 (COVID19 (JANSSEN))	33													COVID19 (COVID19 (MODERNA))	33	1	1							1	1			COVID19 (COVID19 (PFIZER-BIONTECH))	33	2	1							2	1			HPV (GARDASIL 9)	33
COVID19 (COVID19 (JANSSEN))	34													COVID19 (COVID19 (MODERNA))	34													COVID19 (COVID19 (PFIZER-BIONTECH))	34													HPV (GARDASIL 9)	34
COVID19 (COVID19 (JANSSEN))	35													COVID19 (COVID19 (MODERNA))	35	1								1				COVID19 (COVID19 (PFIZER-BIONTECH))	35	1		1						1		1		HPV (GARDASIL 9)	35
COVID19 (COVID19 (JANSSEN))	36													COVID19 (COVID19 (MODERNA))	36													COVID19 (COVID19 (PFIZER-BIONTECH))	36	4	3	1						4	3	1		HPV (GARDASIL 9)	36
COVID19 (COVID19 (JANSSEN))	37													COVID19 (COVID19 (MODERNA))	37	3	2	1						3	2	1		COVID19 (COVID19 (PFIZER-BIONTECH))	37													HPV (GARDASIL 9)	37
COVID19 (COVID19 (JANSSEN))	38													COVID19 (COVID19 (MODERNA))	38	2	1	1						2	1	1		COVID19 (COVID19 (PFIZER-BIONTECH))	38	5	3	2						5	3	2		HPV (GARDASIL 9)	38
COVID19 (COVID19 (JANSSEN))	39	1	1							1	1			COVID19 (COVID19 (MODERNA))	39	1		1						1		1		COVID19 (COVID19 (PFIZER-BIONTECH))	39	2	2							2	2			HPV (GARDASIL 9)	39
COVID19 (COVID19 (JANSSEN))	40													COVID19 (COVID19 (MODERNA))	40													COVID19 (COVID19 (PFIZER-BIONTECH))	40	2	1	1						2	1	1		HPV (GARDASIL 9)	40
COVID19 (COVID19 (JANSSEN))	41													COVID19 (COVID19 (MODERNA))	41	1	1							1	1			COVID19 (COVID19 (PFIZER-BIONTECH))	41	1		1						1		1		HPV (GARDASIL 9)	41
COVID19 (COVID19 (JANSSEN))	42													COVID19 (COVID19 (MODERNA))	42													COVID19 (COVID19 (PFIZER-BIONTECH))	42	1		1						1		1		HPV (GARDASIL 9)	42
COVID19 (COVID19 (JANSSEN))	43													COVID19 (COVID19 (MODERNA))	43													COVID19 (COVID19 (PFIZER-BIONTECH))	43													HPV (GARDASIL 9)	43
COVID19 (COVID19 (JANSSEN))	44													COVID19 (COVID19 (MODERNA))	44													COVID19 (COVID19 (PFIZER-BIONTECH))	44													HPV (GARDASIL 9)	44
COVID19 (COVID19 (JANSSEN))	45													COVID19 (COVID19 (MODERNA))	45													COVID19 (COVID19 (PFIZER-BIONTECH))	45	2	1	1						2	1	1		HPV (GARDASIL 9)	45
COVID19 (COVID19 (JANSSEN))	46													COVID19 (COVID19 (MODERNA))	46													COVID19 (COVID19 (PFIZER-BIONTECH))	46	1		1						1		1		HPV (GARDASIL 9)	46
COVID19 (COVID19 (JANSSEN))	47													COVID19 (COVID19 (MODERNA))	47													COVID19 (COVID19 (PFIZER-BIONTECH))	47	1								1				HPV (GARDASIL 9)	47
COVID19 (COVID19 (JANSSEN))	48													COVID19 (COVID19 (MODERNA))	48													COVID19 (COVID19 (PFIZER-BIONTECH))	48													HPV (GARDASIL 9)	48
COVID19 (COVID19 (JANSSEN))	49													COVID19 (COVID19 (MODERNA))	49													COVID19 (COVID19 (PFIZER-BIONTECH))	49													HPV (GARDASIL 9)	49
COVID19 (COVID19 (JANSSEN))	50													COVID19 (COVID19 (MODERNA))	50	1		1						1		1		COVID19 (COVID19 (PFIZER-BIONTECH))	50													HPV (GARDASIL 9)	50
COVID19 (COVID19 (JANSSEN))	51													COVID19 (COVID19 (MODERNA))	51													COVID19 (COVID19 (PFIZER-BIONTECH))	51	1	1							1	1			HPV (GARDASIL 9)	51
COVID19 (COVID19 (JANSSEN))	52													COVID19 (COVID19 (MODERNA))	52													COVID19 (COVID19 (PFIZER-BIONTECH))	52													HPV (GARDASIL 9)	52
COVID19 (COVID19 (JANSSEN))	53													COVID19 (COVID19 (MODERNA))	53													COVID19 (COVID19 (PFIZER-BIONTECH))	53	1	1							1	1			HPV (GARDASIL 9)	53
COVID19 (COVID19 (JANSSEN))	54													COVID19 (COVID19 (MODERNA))	54													COVID19 (COVID19 (PFIZER-BIONTECH))	54													HPV (GARDASIL 9)	54
COVID19 (COVID19 (JANSSEN))	55													COVID19 (COVID19 (MODERNA))	55													COVID19 (COVID19 (PFIZER-BIONTECH))	55													HPV (GARDASIL 9)	55
COVID19 (COVID19 (JANSSEN))	56													COVID19 (COVID19 (MODERNA))	56													COVID19 (COVID19 (PFIZER-BIONTECH))	56													HPV (GARDASIL 9)	56
COVID19 (COVID19 (JANSSEN))	57													COVID19 (COVID19 (MODERNA))	57	2	1	1						2	1	1		COVID19 (COVID19 (PFIZER-BIONTECH))	57	1	1							1	1			HPV (GARDASIL 9)	57
COVID19 (COVID19 (JANSSEN))	58													COVID19 (COVID19 (MODERNA))	58													COVID19 (COVID19 (PFIZER-BIONTECH))	58													HPV (GARDASIL 9)	58
COVID19 (COVID19 (JANSSEN))	59													COVID19 (COVID19 (MODERNA))	59													COVID19 (COVID19 (PFIZER-BIONTECH))	59													HPV (GARDASIL 9)	59
COVID19 (COVID19 (JANSSEN))	60													COVID19 (COVID19 (MODERNA))	60													COVID19 (COVID19 (PFIZER-BIONTECH))	60													HPV (GARDASIL 9)	60
COVID19 (COVID19 (JANSSEN))	61													COVID19 (COVID19 (MODERNA))	61													COVID19 (COVID19 (PFIZER-BIONTECH))	61													HPV (GARDASIL 9)	61
COVID19 (COVID19 (JANSSEN))	62													COVID19 (COVID19 (MODERNA))	62													COVID19 (COVID19 (PFIZER-BIONTECH))	62													HPV (GARDASIL 9)	62
COVID19 (COVID19 (JANSSEN))	63													COVID19 (COVID19 (MODERNA))	63													COVID19 (COVID19 (PFIZER-BIONTECH))	63													HPV (GARDASIL 9)	63
COVID19 (COVID19 (JANSSEN))	64													COVID19 (COVID19 (MODERNA))	64													COVID19 (COVID19 (PFIZER-BIONTECH))	64													HPV (GARDASIL 9)	64
COVID19 (COVID19 (JANSSEN))	65													COVID19 (COVID19 (MODERNA))	65													COVID19 (COVID19 (PFIZER-BIONTECH))	65													HPV (GARDASIL 9)	65
COVID19 (COVID19 (JANSSEN))	66													COVID19 (COVID19 (MODERNA))	66													COVID19 (COVID19 (PFIZER-BIONTECH))	66													HPV (GARDASIL 9)	66
COVID19 (COVID19 (JANSSEN))	67													COVID19 (COVID19 (MODERNA))	67													COVID19 (COVID19 (PFIZER-BIONTECH))	67													HPV (GARDASIL 9)	67
COVID19 (COVID19 (JANSSEN))	68													COVID19 (COVID19 (MODERNA))	68													COVID19 (COVID19 (PFIZER-BIONTECH))	68													HPV (GARDASIL 9)	68
COVID19 (COVID19 (JANSSEN))	69													COVID19 (COVID19 (MODERNA))	69													COVID19 (COVID19 (PFIZER-BIONTECH))	69	1	1							1	1			HPV (GARDASIL 9)	69
COVID19 (COVID19 (JANSSEN))	70													COVID19 (COVID19 (MODERNA))	70													COVID19 (COVID19 (PFIZER-BIONTECH))	70													HPV (GARDASIL 9)	70
COVID19 (COVID19 (JANSSEN))	71													COVID19 (COVID19 (MODERNA))	71													COVID19 (COVID19 (PFIZER-BIONTECH))	71													HPV (GARDASIL 9)	71
COVID19 (COVID19 (JANSSEN))	72													COVID19 (COVID19 (MODERNA))	72													COVID19 (COVID19 (PFIZER-BIONTECH))	72													HPV (GARDASIL 9)	72
COVID19 (COVID19 (JANSSEN))	73													COVID19 (COVID19 (MODERNA))	73													COVID19 (COVID19 (PFIZER-BIONTECH))	73													HPV (GARDASIL 9)	73
COVID19 (COVID19 (JANSSEN))	74													COVID19 (COVID19 (MODERNA))	74													COVID19 (COVID19 (PFIZER-BIONTECH))	74													HPV (GARDASIL 9)	74
COVID19 (COVID19 (JANSSEN))	75													COVID19 (COVID19 (MODERNA))	75													COVID19 (COVID19 (PFIZER-BIONTECH))	75													HPV (GARDASIL 9)	75
COVID19 (COVID19 (JANSSEN))	76													COVID19 (COVID19 (MODERNA))	76													COVID19 (COVID19 (PFIZER-BIONTECH))	76													HPV (GARDASIL 9)	76
COVID19 (COVID19 (JANSSEN))	77													COVID19 (COVID19 (MODERNA))	77													COVID19 (COVID19 (PFIZER-BIONTECH))	77													HPV (GARDASIL 9)	77
COVID19 (COVID19 (JANSSEN))	78													COVID19 (COVID19 (MODERNA))	78													COVID19 (COVID19 (PFIZER-BIONTECH))	78													HPV (GARDASIL 9)	78
COVID19 (COVID19 (JANSSEN))	79													COVID19 (COVID19 (MODERNA))	79													COVID19 (COVID19 (PFIZER-BIONTECH))	79													HPV (GARDASIL 9)	79
COVID19 (COVID19 (JANSSEN))	80													COVID19 (COVID19 (MODERNA))	80	1	1							1	1			COVID19 (COVID19 (PFIZER-BIONTECH))	80													HPV (GARDASIL 9)	80
COVID19 (COVID19 (JANSSEN))	81													COVID19 (COVID19 (MODERNA))	81													COVID19 (COVID19 (PFIZER-BIONTECH))	81													HPV (GARDASIL 9)	81
COVID19 (COVID19 (JANSSEN))	82													COVID19 (COVID19 (MODERNA))	82													COVID19 (COVID19 (PFIZER-BIONTECH))	82													HPV (GARDASIL 9)	82
COVID19 (COVID19 (JANSSEN))	83													COVID19 (COVID19 (MODERNA))	83													COVID19 (COVID19 (PFIZER-BIONTECH))	83													HPV (GARDASIL 9)	83
COVID19 (COVID19 (JANSSEN))	84													COVID19 (COVID19 (MODERNA))	84													COVID19 (COVID19 (PFIZER-BIONTECH))	84													HPV (GARDASIL 9)	84
COVID19 (COVID19 (JANSSEN))	85													COVID19 (COVID19 (MODERNA))	85													COVID19 (COVID19 (PFIZER-BIONTECH))	85													HPV (GARDASIL 9)	85
COVID19 (COVID19 (JANSSEN))	86													COVID19 (COVID19 (MODERNA))	86													COVID19 (COVID19 (PFIZER-BIONTECH))	86													HPV (GARDASIL 9)	86
COVID19 (COVID19 (JANSSEN))	87													COVID19 (COVID19 (MODERNA))	87													COVID19 (COVID19 (PFIZER-BIONTECH))	87													HPV (GARDASIL 9)	87
COVID19 (COVID19 (JANSSEN))	88													COVID19 (COVID19 (MODERNA))	88													COVID19 (COVID19 (PFIZER-BIONTECH))	88													HPV (GARDASIL 9)	88
COVID19 (COVID19 (JANSSEN))	89													COVID19 (COVID19 (MODERNA))	89													COVID19 (COVID19 (PFIZER-BIONTECH))	89													HPV (GARDASIL 9)	89
COVID19 (COVID19 (JANSSEN))	90													COVID19 (COVID19 (MODERNA))	90													COVID19 (COVID19 (PFIZER-BIONTECH))	90													HPV (GARDASIL 9)	90
COVID19 (COVID19 (JANSSEN))	91													COVID19 (COVID19 (MODERNA))	91													COVID19 (COVID19 (PFIZER-BIONTECH))	91													HPV (GARDASIL 9)	91
COVID19 (COVID19 (JANSSEN))	92													COVID19 (COVID19 (MODERNA))	92													COVID19 (COVID19 (PFIZER-BIONTECH))	92													HPV (GARDASIL 9)	92
COVID19 (COVID19 (JANSSEN))	93													COVID19 (COVID19 (MODERNA))	93													COVID19 (COVID19 (PFIZER-BIONTECH))	93													HPV (GARDASIL 9)	93
COVID19 (COVID19 (JANSSEN))	94													COVID19 (COVID19 (MODERNA))	94													COVID19 (COVID19 (PFIZER-BIONTECH))	94													HPV (GARDASIL 9)	94
COVID19 (COVID19 (JANSSEN))	95													COVID19 (COVID19 (MODERNA))	95													COVID19 (COVID19 (PFIZER-BIONTECH))	95													HPV (GARDASIL 9)	95
COVID19 (COVID19 (JANSSEN))	96													COVID19 (COVID19 (MODERNA))	96													COVID19 (COVID19 (PFIZER-BIONTECH))	96													HPV (GARDASIL 9)	96
COVID19 (COVID19 (JANSSEN))	97													COVID19 (COVID19 (MODERNA))	97													COVID19 (COVID19 (PFIZER-BIONTECH))	97													HPV (GARDASIL 9)	97
COVID19 (COVID19 (JANSSEN))	98													COVID19 (COVID19 (MODERNA))	98													COVID19 (COVID19 (PFIZER-BIONTECH))	98													HPV (GARDASIL 9)	98
COVID19 (COVID19 (JANSSEN))	99													COVID19 (COVID19 (MODERNA))	99													COVID19 (COVID19 (PFIZER-BIONTECH))	99													HPV (GARDASIL 9)	99
COVID19 (COVID19 (JANSSEN))	100													COVID19 (COVID19 (MODERNA))	100													COVID19 (COVID19 (PFIZER-BIONTECH))	100													HPV (GARDASIL 9)	100
COVID19 (COVID19 (JANSSEN))	101													COVID19 (COVID19 (MODERNA))	101													COVID19 (COVID19 (PFIZER-BIONTECH))	101													HPV (GARDASIL 9)	101
COVID19 (COVID19 (JANSSEN))	102													COVID19 (COVID19 (MODERNA))	102													COVID19 (COVID19 (PFIZER-BIONTECH))	102													HPV (GARDASIL 9)	102
COVID19 (COVID19 (JANSSEN))	103													COVID19 (COVID19 (MODERNA))	103													COVID19 (COVID19 (PFIZER-BIONTECH))	103													HPV (GARDASIL 9)	103
COVID19 (COVID19 (JANSSEN))	104													COVID19 (COVID19 (MODERNA))	104													COVID19 (COVID19 (PFIZER-BIONTECH))	104													HPV (GARDASIL 9)	104
COVID19 (COVID19 (JANSSEN))	105													COVID19 (COVID19 (MODERNA))	105													COVID19 (COVID19 (PFIZER-BIONTECH))	105													HPV (GARDASIL 9)	105
COVID19 (COVID19 (JANSSEN))	106													COVID19 (COVID19 (MODERNA))	106													COVID19 (COVID19 (PFIZER-BIONTECH))	106													HPV (GARDASIL 9)	106
COVID19 (COVID19 (JANSSEN))	107													COVID19 (COVID19 (MODERNA))	107													COVID19 (COVID19 (PFIZER-BIONTECH))	107													HPV (GARDASIL 9)	107
COVID19 (COVID19 (JANSSEN))	108													COVID19 (COVID19 (MODERNA))	108													COVID19 (COVID19 (PFIZER-BIONTECH))	108													HPV (GARDASIL 9)	108
COVID19 (COVID19 (JANSSEN))	109													COVID19 (COVID19 (MODERNA))	109													COVID19 (COVID19 (PFIZER-BIONTECH))	109													HPV (GARDASIL 9)	109
COVID19 (COVID19 (JANSSEN))	110													COVID19 (COVID19 (MODERNA))	110													COVID19 (COVID19 (PFIZER-BIONTECH))	110													HPV (GARDASIL 9)	110
COVID19 (COVID19 (JANSSEN))	111													COVID19 (COVID19 (MODERNA))	111													COVID19 (COVID19 (PFIZER-BIONTECH))	111													HPV (GARDASIL 9)	111
COVID19 (COVID19 (JANSSEN))	112													COVID19 (COVID19 (MODERNA))	112													COVID19 (COVID19 (PFIZER-BIONTECH))	112													HPV (GARDASIL 9)	112
COVID19 (COVID19 (JANSSEN))	113													COVID19 (COVID19 (MODERNA))	113													COVID19 (COVID19 (PFIZER-BIONTECH))	113													HPV (GARDASIL 9)	113
COVID19 (COVID19 (JANSSEN))	114													COVID19 (COVID19 (MODERNA))	114													COVID19 (COVID19 (PFIZER-BIONTECH))	114													HPV (GARDASIL 9)	114
COVID19 (COVID19 (JANSSEN))	115													COVID19 (COVID19 (MODERNA))	115													COVID19 (COVID19 (PFIZER-BIONTECH))	115													HPV (GARDASIL 9)	115
COVID19 (COVID19 (JANSSEN))	116													COVID19 (COVID19 (MODERNA))	116													COVID19 (COVID19 (PFIZER-BIONTECH))	116													HPV (GARDASIL 9)	116
COVID19 (COVID19 (JANSSEN))	117													COVID19 (COVID19 (MODERNA))	117													COVID19 (COVID19 (PFIZER-BIONTECH))	117													HPV (GARDASIL 9)	117
COVID19 (COVID19 (JANSSEN))	118													COVID19 (COVID19 (MODERNA))	118													COVID19 (COVID19 (PFIZER-BIONTECH))	118													HPV (GARDASIL 9)	118
COVID19 (COVID19 (JANSSEN))	119													COVID19 (COVID19 (MODERNA))	119													COVID19 (COVID19 (PFIZER-BIONTECH))	119													HPV (GARDASIL 9)	119
COVID19 (COVID19 (JANSSEN))	120													COVID19 (COVID19 (MODERNA))	120													COVID19 (COVID19 (PFIZER-BIONTECH))	120													HPV (GARDASIL 9)	120
Onset report
COVID19 (COVID19 (JANSSEN))	Onset	All	1	2	3	All Male	1 Male	2 Male	3 Male	All Female	1 Female	2 Female	3 Female	COVID19 (COVID19 (MODERNA))	Onset	All	1	2	3	All Male	1 Male	2 Male	3 Male	All Female	1 Female	2 Female	3 Female	COVID19 (COVID19 (PFIZER-BIONTECH))	Onset	All	1	2	3	All Male	1 Male	2 Male	3 Male	All Female	1 Female	2 Female	3 Female	HPV (GARDASIL 9)	Onset	All	1	2	3	All Male	1 Male
COVID19 (COVID19 (JANSSEN))	0	1								1				COVID19 (COVID19 (MODERNA))	0	9	8							9	8			COVID19 (COVID19 (PFIZER-BIONTECH))	0	66	36	27						66	36	27		HPV (GARDASIL 9)	0
COVID19 (COVID19 (JANSSEN))	1													COVID19 (COVID19 (MODERNA))	1	6	3	3						6	3	3		COVID19 (COVID19 (PFIZER-BIONTECH))	1	7	6		1					7	6		1	HPV (GARDASIL 9)	1
COVID19 (COVID19 (JANSSEN))	2													COVID19 (COVID19 (MODERNA))	2	1	1							1	1			COVID19 (COVID19 (PFIZER-BIONTECH))	2	7	4	3						7	4	3		HPV (GARDASIL 9)	2
COVID19 (COVID19 (JANSSEN))	3													COVID19 (COVID19 (MODERNA))	3													COVID19 (COVID19 (PFIZER-BIONTECH))	3	3	2							3	2			HPV (GARDASIL 9)	3
COVID19 (COVID19 (JANSSEN))	4													COVID19 (COVID19 (MODERNA))	4													COVID19 (COVID19 (PFIZER-BIONTECH))	4	5	3	1						5	3	1		HPV (GARDASIL 9)	4
COVID19 (COVID19 (JANSSEN))	5													COVID19 (COVID19 (MODERNA))	5													COVID19 (COVID19 (PFIZER-BIONTECH))	5	7	5	2						7	5	2		HPV (GARDASIL 9)	5
COVID19 (COVID19 (JANSSEN))	6													COVID19 (COVID19 (MODERNA))	6													COVID19 (COVID19 (PFIZER-BIONTECH))	6	1	1							1	1			HPV (GARDASIL 9)	6
COVID19 (COVID19 (JANSSEN))	7													COVID19 (COVID19 (MODERNA))	7	3	3							3	3			COVID19 (COVID19 (PFIZER-BIONTECH))	7	7	5	2						7	5	2		HPV (GARDASIL 9)	7
COVID19 (COVID19 (JANSSEN))	8													COVID19 (COVID19 (MODERNA))	8													COVID19 (COVID19 (PFIZER-BIONTECH))	8	2	2							2	2			HPV (GARDASIL 9)	8
COVID19 (COVID19 (JANSSEN))	9													COVID19 (COVID19 (MODERNA))	9	2	1	1						2	1	1		COVID19 (COVID19 (PFIZER-BIONTECH))	9	1	1							1	1			HPV (GARDASIL 9)	9
COVID19 (COVID19 (JANSSEN))	10													COVID19 (COVID19 (MODERNA))	10	1	1							1	1			COVID19 (COVID19 (PFIZER-BIONTECH))	10													HPV (GARDASIL 9)	10	1	1
COVID19 (COVID19 (JANSSEN))	11													COVID19 (COVID19 (MODERNA))	11													COVID19 (COVID19 (PFIZER-BIONTECH))	11	3	2	1						3	2	1		HPV (GARDASIL 9)	11
COVID19 (COVID19 (JANSSEN))	12													COVID19 (COVID19 (MODERNA))	12	1		1						1		1		COVID19 (COVID19 (PFIZER-BIONTECH))	12													HPV (GARDASIL 9)	12
COVID19 (COVID19 (JANSSEN))	13													COVID19 (COVID19 (MODERNA))	13													COVID19 (COVID19 (PFIZER-BIONTECH))	13	3	2							3	2			HPV (GARDASIL 9)	13
COVID19 (COVID19 (JANSSEN))	14													COVID19 (COVID19 (MODERNA))	14													COVID19 (COVID19 (PFIZER-BIONTECH))	14	2	2							2	2			HPV (GARDASIL 9)	14
COVID19 (COVID19 (JANSSEN))	15													COVID19 (COVID19 (MODERNA))	15													COVID19 (COVID19 (PFIZER-BIONTECH))	15	2	2							2	2			HPV (GARDASIL 9)	15
COVID19 (COVID19 (JANSSEN))	16													COVID19 (COVID19 (MODERNA))	16	1		1						1		1		COVID19 (COVID19 (PFIZER-BIONTECH))	16	1	1							1	1			HPV (GARDASIL 9)	16
COVID19 (COVID19 (JANSSEN))	17													COVID19 (COVID19 (MODERNA))	17													COVID19 (COVID19 (PFIZER-BIONTECH))	17													HPV (GARDASIL 9)	17
COVID19 (COVID19 (JANSSEN))	18													COVID19 (COVID19 (MODERNA))	18													COVID19 (COVID19 (PFIZER-BIONTECH))	18	1	1							1	1			HPV (GARDASIL 9)	18
COVID19 (COVID19 (JANSSEN))	19													COVID19 (COVID19 (MODERNA))	19													COVID19 (COVID19 (PFIZER-BIONTECH))	19	1		1						1		1		HPV (GARDASIL 9)	19
COVID19 (COVID19 (JANSSEN))	20													COVID19 (COVID19 (MODERNA))	20													COVID19 (COVID19 (PFIZER-BIONTECH))	20	2	2							2	2			HPV (GARDASIL 9)	20
COVID19 (COVID19 (JANSSEN))	21													COVID19 (COVID19 (MODERNA))	21													COVID19 (COVID19 (PFIZER-BIONTECH))	21	2	1	1						2	1	1		HPV (GARDASIL 9)	21
COVID19 (COVID19 (JANSSEN))	22													COVID19 (COVID19 (MODERNA))	22													COVID19 (COVID19 (PFIZER-BIONTECH))	22	1	1							1	1			HPV (GARDASIL 9)	22
COVID19 (COVID19 (JANSSEN))	23													COVID19 (COVID19 (MODERNA))	23													COVID19 (COVID19 (PFIZER-BIONTECH))	23	1		1						1		1		HPV (GARDASIL 9)	23
COVID19 (COVID19 (JANSSEN))	24													COVID19 (COVID19 (MODERNA))	24	1		1						1		1		COVID19 (COVID19 (PFIZER-BIONTECH))	24													HPV (GARDASIL 9)	24
COVID19 (COVID19 (JANSSEN))	25													COVID19 (COVID19 (MODERNA))	25													COVID19 (COVID19 (PFIZER-BIONTECH))	25													HPV (GARDASIL 9)	25
COVID19 (COVID19 (JANSSEN))	26													COVID19 (COVID19 (MODERNA))	26													COVID19 (COVID19 (PFIZER-BIONTECH))	26													HPV (GARDASIL 9)	26
COVID19 (COVID19 (JANSSEN))	27													COVID19 (COVID19 (MODERNA))	27	1	1							1	1			COVID19 (COVID19 (PFIZER-BIONTECH))	27	2	1	1						2	1	1		HPV (GARDASIL 9)	27
COVID19 (COVID19 (JANSSEN))	28													COVID19 (COVID19 (MODERNA))	28													COVID19 (COVID19 (PFIZER-BIONTECH))	28													HPV (GARDASIL 9)	28
COVID19 (COVID19 (JANSSEN))	29													COVID19 (COVID19 (MODERNA))	29	1		1						1		1		COVID19 (COVID19 (PFIZER-BIONTECH))	29													HPV (GARDASIL 9)	29
COVID19 (COVID19 (JANSSEN))	30													COVID19 (COVID19 (MODERNA))	30													COVID19 (COVID19 (PFIZER-BIONTECH))	30													HPV (GARDASIL 9)	30
COVID19 (COVID19 (JANSSEN))	31													COVID19 (COVID19 (MODERNA))	31													COVID19 (COVID19 (PFIZER-BIONTECH))	31													HPV (GARDASIL 9)	31
COVID19 (COVID19 (JANSSEN))	32													COVID19 (COVID19 (MODERNA))	32													COVID19 (COVID19 (PFIZER-BIONTECH))	32													HPV (GARDASIL 9)	32
COVID19 (COVID19 (JANSSEN))	33													COVID19 (COVID19 (MODERNA))	33													COVID19 (COVID19 (PFIZER-BIONTECH))	33	2	2							2	2			HPV (GARDASIL 9)	33
COVID19 (COVID19 (JANSSEN))	34													COVID19 (COVID19 (MODERNA))	34													COVID19 (COVID19 (PFIZER-BIONTECH))	34													HPV (GARDASIL 9)	34
COVID19 (COVID19 (JANSSEN))	35													COVID19 (COVID19 (MODERNA))	35													COVID19 (COVID19 (PFIZER-BIONTECH))	35	1	1							1	1			HPV (GARDASIL 9)	35
COVID19 (COVID19 (JANSSEN))	36													COVID19 (COVID19 (MODERNA))	36													COVID19 (COVID19 (PFIZER-BIONTECH))	36													HPV (GARDASIL 9)	36
COVID19 (COVID19 (JANSSEN))	37													COVID19 (COVID19 (MODERNA))	37													COVID19 (COVID19 (PFIZER-BIONTECH))	37													HPV (GARDASIL 9)	37
COVID19 (COVID19 (JANSSEN))	38													COVID19 (COVID19 (MODERNA))	38													COVID19 (COVID19 (PFIZER-BIONTECH))	38													HPV (GARDASIL 9)	38
COVID19 (COVID19 (JANSSEN))	39													COVID19 (COVID19 (MODERNA))	39													COVID19 (COVID19 (PFIZER-BIONTECH))	39													HPV (GARDASIL 9)	39
COVID19 (COVID19 (JANSSEN))	40													COVID19 (COVID19 (MODERNA))	40													COVID19 (COVID19 (PFIZER-BIONTECH))	40													HPV (GARDASIL 9)	40
COVID19 (COVID19 (JANSSEN))	41													COVID19 (COVID19 (MODERNA))	41													COVID19 (COVID19 (PFIZER-BIONTECH))	41													HPV (GARDASIL 9)	41
COVID19 (COVID19 (JANSSEN))	42													COVID19 (COVID19 (MODERNA))	42													COVID19 (COVID19 (PFIZER-BIONTECH))	42													HPV (GARDASIL 9)	42
COVID19 (COVID19 (JANSSEN))	43													COVID19 (COVID19 (MODERNA))	43													COVID19 (COVID19 (PFIZER-BIONTECH))	43													HPV (GARDASIL 9)	43
COVID19 (COVID19 (JANSSEN))	44													COVID19 (COVID19 (MODERNA))	44													COVID19 (COVID19 (PFIZER-BIONTECH))	44	1		1						1		1		HPV (GARDASIL 9)	44
COVID19 (COVID19 (JANSSEN))	45													COVID19 (COVID19 (MODERNA))	45													COVID19 (COVID19 (PFIZER-BIONTECH))	45													HPV (GARDASIL 9)	45
COVID19 (COVID19 (JANSSEN))	46													COVID19 (COVID19 (MODERNA))	46													COVID19 (COVID19 (PFIZER-BIONTECH))	46													HPV (GARDASIL 9)	46
COVID19 (COVID19 (JANSSEN))	47													COVID19 (COVID19 (MODERNA))	47													COVID19 (COVID19 (PFIZER-BIONTECH))	47													HPV (GARDASIL 9)	47
COVID19 (COVID19 (JANSSEN))	48													COVID19 (COVID19 (MODERNA))	48													COVID19 (COVID19 (PFIZER-BIONTECH))	48													HPV (GARDASIL 9)	48
COVID19 (COVID19 (JANSSEN))	49													COVID19 (COVID19 (MODERNA))	49													COVID19 (COVID19 (PFIZER-BIONTECH))	49													HPV (GARDASIL 9)	49
COVID19 (COVID19 (JANSSEN))	50													COVID19 (COVID19 (MODERNA))	50													COVID19 (COVID19 (PFIZER-BIONTECH))	50	1		1						1		1		HPV (GARDASIL 9)	50
COVID19 (COVID19 (JANSSEN))	51													COVID19 (COVID19 (MODERNA))	51													COVID19 (COVID19 (PFIZER-BIONTECH))	51													HPV (GARDASIL 9)	51
COVID19 (COVID19 (JANSSEN))	52													COVID19 (COVID19 (MODERNA))	52													COVID19 (COVID19 (PFIZER-BIONTECH))	52													HPV (GARDASIL 9)	52
COVID19 (COVID19 (JANSSEN))	53													COVID19 (COVID19 (MODERNA))	53	1		1						1		1		COVID19 (COVID19 (PFIZER-BIONTECH))	53	2	1	1						2	1	1		HPV (GARDASIL 9)	53
COVID19 (COVID19 (JANSSEN))	54													COVID19 (COVID19 (MODERNA))	54													COVID19 (COVID19 (PFIZER-BIONTECH))	54													HPV (GARDASIL 9)	54
COVID19 (COVID19 (JANSSEN))	55													COVID19 (COVID19 (MODERNA))	55													COVID19 (COVID19 (PFIZER-BIONTECH))	55													HPV (GARDASIL 9)	55
COVID19 (COVID19 (JANSSEN))	56	1	1							1	1			COVID19 (COVID19 (MODERNA))	56													COVID19 (COVID19 (PFIZER-BIONTECH))	56													HPV (GARDASIL 9)	56
COVID19 (COVID19 (JANSSEN))	57													COVID19 (COVID19 (MODERNA))	57													COVID19 (COVID19 (PFIZER-BIONTECH))	57													HPV (GARDASIL 9)	57
COVID19 (COVID19 (JANSSEN))	58													COVID19 (COVID19 (MODERNA))	58													COVID19 (COVID19 (PFIZER-BIONTECH))	58													HPV (GARDASIL 9)	58
COVID19 (COVID19 (JANSSEN))	59													COVID19 (COVID19 (MODERNA))	59													COVID19 (COVID19 (PFIZER-BIONTECH))	59													HPV (GARDASIL 9)	59
COVID19 (COVID19 (JANSSEN))	60													COVID19 (COVID19 (MODERNA))	60													COVID19 (COVID19 (PFIZER-BIONTECH))	60													HPV (GARDASIL 9)	60
COVID19 (COVID19 (JANSSEN))	61													COVID19 (COVID19 (MODERNA))	61													COVID19 (COVID19 (PFIZER-BIONTECH))	61													HPV (GARDASIL 9)	61
COVID19 (COVID19 (JANSSEN))	62													COVID19 (COVID19 (MODERNA))	62													COVID19 (COVID19 (PFIZER-BIONTECH))	62													HPV (GARDASIL 9)	62
COVID19 (COVID19 (JANSSEN))	63													COVID19 (COVID19 (MODERNA))	63													COVID19 (COVID19 (PFIZER-BIONTECH))	63													HPV (GARDASIL 9)	63
COVID19 (COVID19 (JANSSEN))	64													COVID19 (COVID19 (MODERNA))	64													COVID19 (COVID19 (PFIZER-BIONTECH))	64													HPV (GARDASIL 9)	64
COVID19 (COVID19 (JANSSEN))	65													COVID19 (COVID19 (MODERNA))	65													COVID19 (COVID19 (PFIZER-BIONTECH))	65													HPV (GARDASIL 9)	65
COVID19 (COVID19 (JANSSEN))	66													COVID19 (COVID19 (MODERNA))	66													COVID19 (COVID19 (PFIZER-BIONTECH))	66													HPV (GARDASIL 9)	66
COVID19 (COVID19 (JANSSEN))	67													COVID19 (COVID19 (MODERNA))	67													COVID19 (COVID19 (PFIZER-BIONTECH))	67													HPV (GARDASIL 9)	67
COVID19 (COVID19 (JANSSEN))	68													COVID19 (COVID19 (MODERNA))	68													COVID19 (COVID19 (PFIZER-BIONTECH))	68													HPV (GARDASIL 9)	68
COVID19 (COVID19 (JANSSEN))	69													COVID19 (COVID19 (MODERNA))	69													COVID19 (COVID19 (PFIZER-BIONTECH))	69													HPV (GARDASIL 9)	69
COVID19 (COVID19 (JANSSEN))	70													COVID19 (COVID19 (MODERNA))	70													COVID19 (COVID19 (PFIZER-BIONTECH))	70													HPV (GARDASIL 9)	70
COVID19 (COVID19 (JANSSEN))	71													COVID19 (COVID19 (MODERNA))	71													COVID19 (COVID19 (PFIZER-BIONTECH))	71													HPV (GARDASIL 9)	71
COVID19 (COVID19 (JANSSEN))	72													COVID19 (COVID19 (MODERNA))	72													COVID19 (COVID19 (PFIZER-BIONTECH))	72													HPV (GARDASIL 9)	72
COVID19 (COVID19 (JANSSEN))	73													COVID19 (COVID19 (MODERNA))	73													COVID19 (COVID19 (PFIZER-BIONTECH))	73													HPV (GARDASIL 9)	73
COVID19 (COVID19 (JANSSEN))	74													COVID19 (COVID19 (MODERNA))	74													COVID19 (COVID19 (PFIZER-BIONTECH))	74													HPV (GARDASIL 9)	74
COVID19 (COVID19 (JANSSEN))	75													COVID19 (COVID19 (MODERNA))	75													COVID19 (COVID19 (PFIZER-BIONTECH))	75													HPV (GARDASIL 9)	75
COVID19 (COVID19 (JANSSEN))	76													COVID19 (COVID19 (MODERNA))	76													COVID19 (COVID19 (PFIZER-BIONTECH))	76													HPV (GARDASIL 9)	76
COVID19 (COVID19 (JANSSEN))	77													COVID19 (COVID19 (MODERNA))	77													COVID19 (COVID19 (PFIZER-BIONTECH))	77													HPV (GARDASIL 9)	77
COVID19 (COVID19 (JANSSEN))	78													COVID19 (COVID19 (MODERNA))	78													COVID19 (COVID19 (PFIZER-BIONTECH))	78													HPV (GARDASIL 9)	78
COVID19 (COVID19 (JANSSEN))	79													COVID19 (COVID19 (MODERNA))	79													COVID19 (COVID19 (PFIZER-BIONTECH))	79													HPV (GARDASIL 9)	79
COVID19 (COVID19 (JANSSEN))	80													COVID19 (COVID19 (MODERNA))	80													COVID19 (COVID19 (PFIZER-BIONTECH))	80													HPV (GARDASIL 9)	80
COVID19 (COVID19 (JANSSEN))	81													COVID19 (COVID19 (MODERNA))	81													COVID19 (COVID19 (PFIZER-BIONTECH))	81													HPV (GARDASIL 9)	81
COVID19 (COVID19 (JANSSEN))	82													COVID19 (COVID19 (MODERNA))	82													COVID19 (COVID19 (PFIZER-BIONTECH))	82													HPV (GARDASIL 9)	82
COVID19 (COVID19 (JANSSEN))	83													COVID19 (COVID19 (MODERNA))	83													COVID19 (COVID19 (PFIZER-BIONTECH))	83													HPV (GARDASIL 9)	83
COVID19 (COVID19 (JANSSEN))	84													COVID19 (COVID19 (MODERNA))	84													COVID19 (COVID19 (PFIZER-BIONTECH))	84													HPV (GARDASIL 9)	84
COVID19 (COVID19 (JANSSEN))	85													COVID19 (COVID19 (MODERNA))	85													COVID19 (COVID19 (PFIZER-BIONTECH))	85													HPV (GARDASIL 9)	85
COVID19 (COVID19 (JANSSEN))	86													COVID19 (COVID19 (MODERNA))	86													COVID19 (COVID19 (PFIZER-BIONTECH))	86													HPV (GARDASIL 9)	86
COVID19 (COVID19 (JANSSEN))	87													COVID19 (COVID19 (MODERNA))	87													COVID19 (COVID19 (PFIZER-BIONTECH))	87													HPV (GARDASIL 9)	87
COVID19 (COVID19 (JANSSEN))	88													COVID19 (COVID19 (MODERNA))	88													COVID19 (COVID19 (PFIZER-BIONTECH))	88													HPV (GARDASIL 9)	88
COVID19 (COVID19 (JANSSEN))	89													COVID19 (COVID19 (MODERNA))	89													COVID19 (COVID19 (PFIZER-BIONTECH))	89													HPV (GARDASIL 9)	89
COVID19 (COVID19 (JANSSEN))	90													COVID19 (COVID19 (MODERNA))	90													COVID19 (COVID19 (PFIZER-BIONTECH))	90													HPV (GARDASIL 9)	90
COVID19 (COVID19 (JANSSEN))	91													COVID19 (COVID19 (MODERNA))	91													COVID19 (COVID19 (PFIZER-BIONTECH))	91													HPV (GARDASIL 9)	91
COVID19 (COVID19 (JANSSEN))	92													COVID19 (COVID19 (MODERNA))	92													COVID19 (COVID19 (PFIZER-BIONTECH))	92													HPV (GARDASIL 9)	92
COVID19 (COVID19 (JANSSEN))	93													COVID19 (COVID19 (MODERNA))	93													COVID19 (COVID19 (PFIZER-BIONTECH))	93													HPV (GARDASIL 9)	93
COVID19 (COVID19 (JANSSEN))	94													COVID19 (COVID19 (MODERNA))	94													COVID19 (COVID19 (PFIZER-BIONTECH))	94													HPV (GARDASIL 9)	94
COVID19 (COVID19 (JANSSEN))	95													COVID19 (COVID19 (MODERNA))	95													COVID19 (COVID19 (PFIZER-BIONTECH))	95													HPV (GARDASIL 9)	95
COVID19 (COVID19 (JANSSEN))	96													COVID19 (COVID19 (MODERNA))	96													COVID19 (COVID19 (PFIZER-BIONTECH))	96													HPV (GARDASIL 9)	96
COVID19 (COVID19 (JANSSEN))	97													COVID19 (COVID19 (MODERNA))	97													COVID19 (COVID19 (PFIZER-BIONTECH))	97													HPV (GARDASIL 9)	97
COVID19 (COVID19 (JANSSEN))	98													COVID19 (COVID19 (MODERNA))	98													COVID19 (COVID19 (PFIZER-BIONTECH))	98													HPV (GARDASIL 9)	98
COVID19 (COVID19 (JANSSEN))	99													COVID19 (COVID19 (MODERNA))	99													COVID19 (COVID19 (PFIZER-BIONTECH))	99													HPV (GARDASIL 9)	99
COVID19 (COVID19 (JANSSEN))	100													COVID19 (COVID19 (MODERNA))	100													COVID19 (COVID19 (PFIZER-BIONTECH))	100													HPV (GARDASIL 9)	100
COVID19 (COVID19 (JANSSEN))	101													COVID19 (COVID19 (MODERNA))	101													COVID19 (COVID19 (PFIZER-BIONTECH))	101													HPV (GARDASIL 9)	101
COVID19 (COVID19 (JANSSEN))	102													COVID19 (COVID19 (MODERNA))	102													COVID19 (COVID19 (PFIZER-BIONTECH))	102													HPV (GARDASIL 9)	102
COVID19 (COVID19 (JANSSEN))	103													COVID19 (COVID19 (MODERNA))	103													COVID19 (COVID19 (PFIZER-BIONTECH))	103													HPV (GARDASIL 9)	103
COVID19 (COVID19 (JANSSEN))	104													COVID19 (COVID19 (MODERNA))	104													COVID19 (COVID19 (PFIZER-BIONTECH))	104													HPV (GARDASIL 9)	104
COVID19 (COVID19 (JANSSEN))	105													COVID19 (COVID19 (MODERNA))	105													COVID19 (COVID19 (PFIZER-BIONTECH))	105													HPV (GARDASIL 9)	105
COVID19 (COVID19 (JANSSEN))	106													COVID19 (COVID19 (MODERNA))	106													COVID19 (COVID19 (PFIZER-BIONTECH))	106													HPV (GARDASIL 9)	106
COVID19 (COVID19 (JANSSEN))	107													COVID19 (COVID19 (MODERNA))	107													COVID19 (COVID19 (PFIZER-BIONTECH))	107													HPV (GARDASIL 9)	107
COVID19 (COVID19 (JANSSEN))	108													COVID19 (COVID19 (MODERNA))	108													COVID19 (COVID19 (PFIZER-BIONTECH))	108													HPV (GARDASIL 9)	108
COVID19 (COVID19 (JANSSEN))	109													COVID19 (COVID19 (MODERNA))	109													COVID19 (COVID19 (PFIZER-BIONTECH))	109													HPV (GARDASIL 9)	109
COVID19 (COVID19 (JANSSEN))	110													COVID19 (COVID19 (MODERNA))	110													COVID19 (COVID19 (PFIZER-BIONTECH))	110													HPV (GARDASIL 9)	110
COVID19 (COVID19 (JANSSEN))	111													COVID19 (COVID19 (MODERNA))	111													COVID19 (COVID19 (PFIZER-BIONTECH))	111													HPV (GARDASIL 9)	111
COVID19 (COVID19 (JANSSEN))	112													COVID19 (COVID19 (MODERNA))	112	2	1	1						2	1	1		COVID19 (COVID19 (PFIZER-BIONTECH))	112													HPV (GARDASIL 9)	112
COVID19 (COVID19 (JANSSEN))	113													COVID19 (COVID19 (MODERNA))	113													COVID19 (COVID19 (PFIZER-BIONTECH))	113													HPV (GARDASIL 9)	113
COVID19 (COVID19 (JANSSEN))	114													COVID19 (COVID19 (MODERNA))	114													COVID19 (COVID19 (PFIZER-BIONTECH))	114													HPV (GARDASIL 9)	114
COVID19 (COVID19 (JANSSEN))	115													COVID19 (COVID19 (MODERNA))	115													COVID19 (COVID19 (PFIZER-BIONTECH))	115													HPV (GARDASIL 9)	115
COVID19 (COVID19 (JANSSEN))	116													COVID19 (COVID19 (MODERNA))	116													COVID19 (COVID19 (PFIZER-BIONTECH))	116													HPV (GARDASIL 9)	116
COVID19 (COVID19 (JANSSEN))	117													COVID19 (COVID19 (MODERNA))	117													COVID19 (COVID19 (PFIZER-BIONTECH))	117													HPV (GARDASIL 9)	117
COVID19 (COVID19 (JANSSEN))	118													COVID19 (COVID19 (MODERNA))	118													COVID19 (COVID19 (PFIZER-BIONTECH))	118													HPV (GARDASIL 9)	118
COVID19 (COVID19 (JANSSEN))	119													COVID19 (COVID19 (MODERNA))	119													COVID19 (COVID19 (PFIZER-BIONTECH))	119													HPV (GARDASIL 9)	119
COVID19 (COVID19 (JANSSEN))	120													COVID19 (COVID19 (MODERNA))	120													COVID19 (COVID19 (PFIZER-BIONTECH))	120													HPV (GARDASIL 9)	120
[truncated: 34 more columns]

## Sheet: All_premenstrual_syndrome
Dose report
Vaccine	All	1	2	3	4	5	6	7+	UNK	N/A
HPV (GARDASIL)	4	2	2
TDAP (ADACEL)	1	1
COVID19 (COVID19 (MODERNA))	58	24	24						10
COVID19 (COVID19 (PFIZER-BIONTECH))	254	142	92						20
COVID19 (COVID19 (JANSSEN))	7	4							3
VACCINE NOT SPECIFIED (NO BRAND NAME)	3		1						2
HEP B (RECOMBIVAX HB)	1								1
HPV (CERVARIX)	2		1	1
MENINGOCOCCAL B (TRUMENBA)	1								1
Total	331
COVID-19	319
COVID-19 %	0.963746
Age report
COVID19 (COVID19 (JANSSEN))	Age	All	1	2	3	All Male	1 Male	2 Male	3 Male	All Female	1 Female	2 Female	3 Female	COVID19 (COVID19 (MODERNA))	Age	All	1	2	3	All Male	1 Male	2 Male	3 Male	All Female	1 Female	2 Female	3 Female	COVID19 (COVID19 (PFIZER-BIONTECH))	Age	All	1	2	3	All Male	1 Male	2 Male	3 Male	All Female	1 Female	2 Female	3 Female	HEP B (RECOMBIVAX HB)	Age	All	1	2	3	All Male	1 Male
COVID19 (COVID19 (JANSSEN))	0													COVID19 (COVID19 (MODERNA))	0	1		1						1		1		COVID19 (COVID19 (PFIZER-BIONTECH))	0	136	85	41						134	83	41		HEP B (RECOMBIVAX HB)	0
COVID19 (COVID19 (JANSSEN))	1													COVID19 (COVID19 (MODERNA))	1													COVID19 (COVID19 (PFIZER-BIONTECH))	1													HEP B (RECOMBIVAX HB)	1
COVID19 (COVID19 (JANSSEN))	2													COVID19 (COVID19 (MODERNA))	2													COVID19 (COVID19 (PFIZER-BIONTECH))	2													HEP B (RECOMBIVAX HB)	2
COVID19 (COVID19 (JANSSEN))	3													COVID19 (COVID19 (MODERNA))	3													COVID19 (COVID19 (PFIZER-BIONTECH))	3													HEP B (RECOMBIVAX HB)	3
COVID19 (COVID19 (JANSSEN))	4													COVID19 (COVID19 (MODERNA))	4													COVID19 (COVID19 (PFIZER-BIONTECH))	4													HEP B (RECOMBIVAX HB)	4
COVID19 (COVID19 (JANSSEN))	5													COVID19 (COVID19 (MODERNA))	5													COVID19 (COVID19 (PFIZER-BIONTECH))	5													HEP B (RECOMBIVAX HB)	5
COVID19 (COVID19 (JANSSEN))	6													COVID19 (COVID19 (MODERNA))	6													COVID19 (COVID19 (PFIZER-BIONTECH))	6													HEP B (RECOMBIVAX HB)	6
COVID19 (COVID19 (JANSSEN))	7													COVID19 (COVID19 (MODERNA))	7													COVID19 (COVID19 (PFIZER-BIONTECH))	7													HEP B (RECOMBIVAX HB)	7
COVID19 (COVID19 (JANSSEN))	8													COVID19 (COVID19 (MODERNA))	8													COVID19 (COVID19 (PFIZER-BIONTECH))	8													HEP B (RECOMBIVAX HB)	8
COVID19 (COVID19 (JANSSEN))	9													COVID19 (COVID19 (MODERNA))	9													COVID19 (COVID19 (PFIZER-BIONTECH))	9													HEP B (RECOMBIVAX HB)	9
COVID19 (COVID19 (JANSSEN))	10													COVID19 (COVID19 (MODERNA))	10													COVID19 (COVID19 (PFIZER-BIONTECH))	10													HEP B (RECOMBIVAX HB)	10
COVID19 (COVID19 (JANSSEN))	11													COVID19 (COVID19 (MODERNA))	11													COVID19 (COVID19 (PFIZER-BIONTECH))	11													HEP B (RECOMBIVAX HB)	11
COVID19 (COVID19 (JANSSEN))	12													COVID19 (COVID19 (MODERNA))	12													COVID19 (COVID19 (PFIZER-BIONTECH))	12													HEP B (RECOMBIVAX HB)	12
COVID19 (COVID19 (JANSSEN))	13													COVID19 (COVID19 (MODERNA))	13													COVID19 (COVID19 (PFIZER-BIONTECH))	13													HEP B (RECOMBIVAX HB)	13
COVID19 (COVID19 (JANSSEN))	14													COVID19 (COVID19 (MODERNA))	14													COVID19 (COVID19 (PFIZER-BIONTECH))	14													HEP B (RECOMBIVAX HB)	14
COVID19 (COVID19 (JANSSEN))	15													COVID19 (COVID19 (MODERNA))	15													COVID19 (COVID19 (PFIZER-BIONTECH))	15													HEP B (RECOMBIVAX HB)	15
COVID19 (COVID19 (JANSSEN))	16													COVID19 (COVID19 (MODERNA))	16													COVID19 (COVID19 (PFIZER-BIONTECH))	16	2	1	1						2	1	1		HEP B (RECOMBIVAX HB)	16
COVID19 (COVID19 (JANSSEN))	17													COVID19 (COVID19 (MODERNA))	17													COVID19 (COVID19 (PFIZER-BIONTECH))	17													HEP B (RECOMBIVAX HB)	17
COVID19 (COVID19 (JANSSEN))	18													COVID19 (COVID19 (MODERNA))	18													COVID19 (COVID19 (PFIZER-BIONTECH))	18	1		1						1		1		HEP B (RECOMBIVAX HB)	18
COVID19 (COVID19 (JANSSEN))	19													COVID19 (COVID19 (MODERNA))	19													COVID19 (COVID19 (PFIZER-BIONTECH))	19	1	1							1	1			HEP B (RECOMBIVAX HB)	19
COVID19 (COVID19 (JANSSEN))	20													COVID19 (COVID19 (MODERNA))	20													COVID19 (COVID19 (PFIZER-BIONTECH))	20	1	1							1	1			HEP B (RECOMBIVAX HB)	20
COVID19 (COVID19 (JANSSEN))	21													COVID19 (COVID19 (MODERNA))	21	2	1							2	1			COVID19 (COVID19 (PFIZER-BIONTECH))	21	1		1						1		1		HEP B (RECOMBIVAX HB)	21
COVID19 (COVID19 (JANSSEN))	22													COVID19 (COVID19 (MODERNA))	22	1	1							1	1			COVID19 (COVID19 (PFIZER-BIONTECH))	22	2	1	1						2	1	1		HEP B (RECOMBIVAX HB)	22
COVID19 (COVID19 (JANSSEN))	23													COVID19 (COVID19 (MODERNA))	23	2		1						2		1		COVID19 (COVID19 (PFIZER-BIONTECH))	23	4	2	2						4	2	2		HEP B (RECOMBIVAX HB)	23
COVID19 (COVID19 (JANSSEN))	24													COVID19 (COVID19 (MODERNA))	24	3		2						3		2		COVID19 (COVID19 (PFIZER-BIONTECH))	24	2	2							2	2			HEP B (RECOMBIVAX HB)	24
COVID19 (COVID19 (JANSSEN))	25													COVID19 (COVID19 (MODERNA))	25													COVID19 (COVID19 (PFIZER-BIONTECH))	25	3	1	1						3	1	1		HEP B (RECOMBIVAX HB)	25
COVID19 (COVID19 (JANSSEN))	26													COVID19 (COVID19 (MODERNA))	26	3	1	2						3	1	2		COVID19 (COVID19 (PFIZER-BIONTECH))	26	2	1	1						2	1	1		HEP B (RECOMBIVAX HB)	26
COVID19 (COVID19 (JANSSEN))	27													COVID19 (COVID19 (MODERNA))	27	1	1							1	1			COVID19 (COVID19 (PFIZER-BIONTECH))	27	3	2	1						3	2	1		HEP B (RECOMBIVAX HB)	27
COVID19 (COVID19 (JANSSEN))	28	1	1							1	1			COVID19 (COVID19 (MODERNA))	28													COVID19 (COVID19 (PFIZER-BIONTECH))	28	3		2						3		2		HEP B (RECOMBIVAX HB)	28
COVID19 (COVID19 (JANSSEN))	29													COVID19 (COVID19 (MODERNA))	29	1		1						1		1		COVID19 (COVID19 (PFIZER-BIONTECH))	29	6	2	3						6	2	3		HEP B (RECOMBIVAX HB)	29
COVID19 (COVID19 (JANSSEN))	30													COVID19 (COVID19 (MODERNA))	30	8	4	2						8	4	2		COVID19 (COVID19 (PFIZER-BIONTECH))	30	3	1	2						3	1	2		HEP B (RECOMBIVAX HB)	30
COVID19 (COVID19 (JANSSEN))	31	1								1				COVID19 (COVID19 (MODERNA))	31	5	2	2						5	2	2		COVID19 (COVID19 (PFIZER-BIONTECH))	31	2		2						2		2		HEP B (RECOMBIVAX HB)	31
COVID19 (COVID19 (JANSSEN))	32													COVID19 (COVID19 (MODERNA))	32													COVID19 (COVID19 (PFIZER-BIONTECH))	32	4	2	2						4	2	2		HEP B (RECOMBIVAX HB)	32
COVID19 (COVID19 (JANSSEN))	33													COVID19 (COVID19 (MODERNA))	33	4	2	2						4	2	2		COVID19 (COVID19 (PFIZER-BIONTECH))	33	7	5	2						7	5	2		HEP B (RECOMBIVAX HB)	33
COVID19 (COVID19 (JANSSEN))	34													COVID19 (COVID19 (MODERNA))	34	2	1	1						2	1	1		COVID19 (COVID19 (PFIZER-BIONTECH))	34	5	1	3						5	1	3		HEP B (RECOMBIVAX HB)	34
COVID19 (COVID19 (JANSSEN))	35	1	1							1	1			COVID19 (COVID19 (MODERNA))	35	3		1						3		1		COVID19 (COVID19 (PFIZER-BIONTECH))	35	4	2	1						4	2	1		HEP B (RECOMBIVAX HB)	35
COVID19 (COVID19 (JANSSEN))	36													COVID19 (COVID19 (MODERNA))	36	3	1	2						3	1	2		COVID19 (COVID19 (PFIZER-BIONTECH))	36	5	3	2						5	3	2		HEP B (RECOMBIVAX HB)	36	1
COVID19 (COVID19 (JANSSEN))	37	1	1							1	1			COVID19 (COVID19 (MODERNA))	37	1	1							1	1			COVID19 (COVID19 (PFIZER-BIONTECH))	37	4	3	1						4	3	1		HEP B (RECOMBIVAX HB)	37
COVID19 (COVID19 (JANSSEN))	38													COVID19 (COVID19 (MODERNA))	38	1		1						1		1		COVID19 (COVID19 (PFIZER-BIONTECH))	38	7	4	2						7	4	2		HEP B (RECOMBIVAX HB)	38
COVID19 (COVID19 (JANSSEN))	39	1								1				COVID19 (COVID19 (MODERNA))	39	2	1	1						2	1	1		COVID19 (COVID19 (PFIZER-BIONTECH))	39	4	3	1						4	3	1		HEP B (RECOMBIVAX HB)	39
COVID19 (COVID19 (JANSSEN))	40													COVID19 (COVID19 (MODERNA))	40	2	1	1						2	1	1		COVID19 (COVID19 (PFIZER-BIONTECH))	40	6	2	4						6	2	4		HEP B (RECOMBIVAX HB)	40
COVID19 (COVID19 (JANSSEN))	41													COVID19 (COVID19 (MODERNA))	41	1	1							1	1			COVID19 (COVID19 (PFIZER-BIONTECH))	41	2		1						2		1		HEP B (RECOMBIVAX HB)	41
COVID19 (COVID19 (JANSSEN))	42													COVID19 (COVID19 (MODERNA))	42	3	2							3	2			COVID19 (COVID19 (PFIZER-BIONTECH))	42	3	2	1						3	2	1		HEP B (RECOMBIVAX HB)	42
COVID19 (COVID19 (JANSSEN))	43	1	1							1	1			COVID19 (COVID19 (MODERNA))	43													COVID19 (COVID19 (PFIZER-BIONTECH))	43	4	1	2						4	1	2		HEP B (RECOMBIVAX HB)	43
COVID19 (COVID19 (JANSSEN))	44													COVID19 (COVID19 (MODERNA))	44	1	1							1	1			COVID19 (COVID19 (PFIZER-BIONTECH))	44	3	3							3	3			HEP B (RECOMBIVAX HB)	44
COVID19 (COVID19 (JANSSEN))	45													COVID19 (COVID19 (MODERNA))	45													COVID19 (COVID19 (PFIZER-BIONTECH))	45	6	2	3						6	2	3		HEP B (RECOMBIVAX HB)	45
COVID19 (COVID19 (JANSSEN))	46													COVID19 (COVID19 (MODERNA))	46	1								1				COVID19 (COVID19 (PFIZER-BIONTECH))	46	2	2							2	2			HEP B (RECOMBIVAX HB)	46
COVID19 (COVID19 (JANSSEN))	47													COVID19 (COVID19 (MODERNA))	47	1		1						1		1		COVID19 (COVID19 (PFIZER-BIONTECH))	47	1								1				HEP B (RECOMBIVAX HB)	47
COVID19 (COVID19 (JANSSEN))	48													COVID19 (COVID19 (MODERNA))	48	1		1						1		1		COVID19 (COVID19 (PFIZER-BIONTECH))	48	3	1	2						2	1	1		HEP B (RECOMBIVAX HB)	48
COVID19 (COVID19 (JANSSEN))	49	1								1				COVID19 (COVID19 (MODERNA))	49	1	1							1	1			COVID19 (COVID19 (PFIZER-BIONTECH))	49													HEP B (RECOMBIVAX HB)	49
COVID19 (COVID19 (JANSSEN))	50													COVID19 (COVID19 (MODERNA))	50	1		1						1		1		COVID19 (COVID19 (PFIZER-BIONTECH))	50	3		3						3		3		HEP B (RECOMBIVAX HB)	50
COVID19 (COVID19 (JANSSEN))	51													COVID19 (COVID19 (MODERNA))	51													COVID19 (COVID19 (PFIZER-BIONTECH))	51													HEP B (RECOMBIVAX HB)	51
COVID19 (COVID19 (JANSSEN))	52													COVID19 (COVID19 (MODERNA))	52	2	1	1						2	1	1		COVID19 (COVID19 (PFIZER-BIONTECH))	52	2	1	1						2	1	1		HEP B (RECOMBIVAX HB)	52
COVID19 (COVID19 (JANSSEN))	53													COVID19 (COVID19 (MODERNA))	53													COVID19 (COVID19 (PFIZER-BIONTECH))	53	2	1	1						2	1	1		HEP B (RECOMBIVAX HB)	53
COVID19 (COVID19 (JANSSEN))	54													COVID19 (COVID19 (MODERNA))	54													COVID19 (COVID19 (PFIZER-BIONTECH))	54	1		1						1		1		HEP B (RECOMBIVAX HB)	54
COVID19 (COVID19 (JANSSEN))	55													COVID19 (COVID19 (MODERNA))	55													COVID19 (COVID19 (PFIZER-BIONTECH))	55													HEP B (RECOMBIVAX HB)	55
COVID19 (COVID19 (JANSSEN))	56													COVID19 (COVID19 (MODERNA))	56													COVID19 (COVID19 (PFIZER-BIONTECH))	56	2	2							2	2			HEP B (RECOMBIVAX HB)	56
COVID19 (COVID19 (JANSSEN))	57													COVID19 (COVID19 (MODERNA))	57													COVID19 (COVID19 (PFIZER-BIONTECH))	57	1	1							1	1			HEP B (RECOMBIVAX HB)	57
COVID19 (COVID19 (JANSSEN))	58													COVID19 (COVID19 (MODERNA))	58													COVID19 (COVID19 (PFIZER-BIONTECH))	58													HEP B (RECOMBIVAX HB)	58
COVID19 (COVID19 (JANSSEN))	59													COVID19 (COVID19 (MODERNA))	59													COVID19 (COVID19 (PFIZER-BIONTECH))	59													HEP B (RECOMBIVAX HB)	59
COVID19 (COVID19 (JANSSEN))	60													COVID19 (COVID19 (MODERNA))	60													COVID19 (COVID19 (PFIZER-BIONTECH))	60													HEP B (RECOMBIVAX HB)	60
COVID19 (COVID19 (JANSSEN))	61													COVID19 (COVID19 (MODERNA))	61													COVID19 (COVID19 (PFIZER-BIONTECH))	61													HEP B (RECOMBIVAX HB)	61
COVID19 (COVID19 (JANSSEN))	62													COVID19 (COVID19 (MODERNA))	62													COVID19 (COVID19 (PFIZER-BIONTECH))	62													HEP B (RECOMBIVAX HB)	62
COVID19 (COVID19 (JANSSEN))	63													COVID19 (COVID19 (MODERNA))	63													COVID19 (COVID19 (PFIZER-BIONTECH))	63	1	1							1	1			HEP B (RECOMBIVAX HB)	63
COVID19 (COVID19 (JANSSEN))	64													COVID19 (COVID19 (MODERNA))	64													COVID19 (COVID19 (PFIZER-BIONTECH))	64													HEP B (RECOMBIVAX HB)	64
COVID19 (COVID19 (JANSSEN))	65													COVID19 (COVID19 (MODERNA))	65													COVID19 (COVID19 (PFIZER-BIONTECH))	65													HEP B (RECOMBIVAX HB)	65
COVID19 (COVID19 (JANSSEN))	66													COVID19 (COVID19 (MODERNA))	66													COVID19 (COVID19 (PFIZER-BIONTECH))	66													HEP B (RECOMBIVAX HB)	66
COVID19 (COVID19 (JANSSEN))	67													COVID19 (COVID19 (MODERNA))	67													COVID19 (COVID19 (PFIZER-BIONTECH))	67													HEP B (RECOMBIVAX HB)	67
COVID19 (COVID19 (JANSSEN))	68													COVID19 (COVID19 (MODERNA))	68	1	1							1	1			COVID19 (COVID19 (PFIZER-BIONTECH))	68													HEP B (RECOMBIVAX HB)	68
COVID19 (COVID19 (JANSSEN))	69													COVID19 (COVID19 (MODERNA))	69													COVID19 (COVID19 (PFIZER-BIONTECH))	69													HEP B (RECOMBIVAX HB)	69
COVID19 (COVID19 (JANSSEN))	70													COVID19 (COVID19 (MODERNA))	70													COVID19 (COVID19 (PFIZER-BIONTECH))	70													HEP B (RECOMBIVAX HB)	70
COVID19 (COVID19 (JANSSEN))	71													COVID19 (COVID19 (MODERNA))	71													COVID19 (COVID19 (PFIZER-BIONTECH))	71													HEP B (RECOMBIVAX HB)	71
COVID19 (COVID19 (JANSSEN))	72													COVID19 (COVID19 (MODERNA))	72													COVID19 (COVID19 (PFIZER-BIONTECH))	72													HEP B (RECOMBIVAX HB)	72
COVID19 (COVID19 (JANSSEN))	73													COVID19 (COVID19 (MODERNA))	73													COVID19 (COVID19 (PFIZER-BIONTECH))	73													HEP B (RECOMBIVAX HB)	73
COVID19 (COVID19 (JANSSEN))	74													COVID19 (COVID19 (MODERNA))	74													COVID19 (COVID19 (PFIZER-BIONTECH))	74													HEP B (RECOMBIVAX HB)	74
COVID19 (COVID19 (JANSSEN))	75													COVID19 (COVID19 (MODERNA))	75													COVID19 (COVID19 (PFIZER-BIONTECH))	75													HEP B (RECOMBIVAX HB)	75
COVID19 (COVID19 (JANSSEN))	76													COVID19 (COVID19 (MODERNA))	76													COVID19 (COVID19 (PFIZER-BIONTECH))	76													HEP B (RECOMBIVAX HB)	76
COVID19 (COVID19 (JANSSEN))	77													COVID19 (COVID19 (MODERNA))	77													COVID19 (COVID19 (PFIZER-BIONTECH))	77													HEP B (RECOMBIVAX HB)	77
COVID19 (COVID19 (JANSSEN))	78													COVID19 (COVID19 (MODERNA))	78													COVID19 (COVID19 (PFIZER-BIONTECH))	78													HEP B (RECOMBIVAX HB)	78
COVID19 (COVID19 (JANSSEN))	79													COVID19 (COVID19 (MODERNA))	79													COVID19 (COVID19 (PFIZER-BIONTECH))	79													HEP B (RECOMBIVAX HB)	79
COVID19 (COVID19 (JANSSEN))	80													COVID19 (COVID19 (MODERNA))	80													COVID19 (COVID19 (PFIZER-BIONTECH))	80													HEP B (RECOMBIVAX HB)	80
COVID19 (COVID19 (JANSSEN))	81													COVID19 (COVID19 (MODERNA))	81													COVID19 (COVID19 (PFIZER-BIONTECH))	81													HEP B (RECOMBIVAX HB)	81
COVID19 (COVID19 (JANSSEN))	82													COVID19 (COVID19 (MODERNA))	82													COVID19 (COVID19 (PFIZER-BIONTECH))	82													HEP B (RECOMBIVAX HB)	82
COVID19 (COVID19 (JANSSEN))	83													COVID19 (COVID19 (MODERNA))	83													COVID19 (COVID19 (PFIZER-BIONTECH))	83													HEP B (RECOMBIVAX HB)	83
COVID19 (COVID19 (JANSSEN))	84													COVID19 (COVID19 (MODERNA))	84													COVID19 (COVID19 (PFIZER-BIONTECH))	84													HEP B (RECOMBIVAX HB)	84
COVID19 (COVID19 (JANSSEN))	85													COVID19 (COVID19 (MODERNA))	85													COVID19 (COVID19 (PFIZER-BIONTECH))	85													HEP B (RECOMBIVAX HB)	85
COVID19 (COVID19 (JANSSEN))	86													COVID19 (COVID19 (MODERNA))	86													COVID19 (COVID19 (PFIZER-BIONTECH))	86													HEP B (RECOMBIVAX HB)	86
COVID19 (COVID19 (JANSSEN))	87													COVID19 (COVID19 (MODERNA))	87													COVID19 (COVID19 (PFIZER-BIONTECH))	87													HEP B (RECOMBIVAX HB)	87
COVID19 (COVID19 (JANSSEN))	88													COVID19 (COVID19 (MODERNA))	88													COVID19 (COVID19 (PFIZER-BIONTECH))	88													HEP B (RECOMBIVAX HB)	88
COVID19 (COVID19 (JANSSEN))	89													COVID19 (COVID19 (MODERNA))	89													COVID19 (COVID19 (PFIZER-BIONTECH))	89													HEP B (RECOMBIVAX HB)	89
COVID19 (COVID19 (JANSSEN))	90													COVID19 (COVID19 (MODERNA))	90													COVID19 (COVID19 (PFIZER-BIONTECH))	90													HEP B (RECOMBIVAX HB)	90
COVID19 (COVID19 (JANSSEN))	91													COVID19 (COVID19 (MODERNA))	91													COVID19 (COVID19 (PFIZER-BIONTECH))	91													HEP B (RECOMBIVAX HB)	91
COVID19 (COVID19 (JANSSEN))	92													COVID19 (COVID19 (MODERNA))	92													COVID19 (COVID19 (PFIZER-BIONTECH))	92													HEP B (RECOMBIVAX HB)	92
COVID19 (COVID19 (JANSSEN))	93													COVID19 (COVID19 (MODERNA))	93													COVID19 (COVID19 (PFIZER-BIONTECH))	93													HEP B (RECOMBIVAX HB)	93
COVID19 (COVID19 (JANSSEN))	94													COVID19 (COVID19 (MODERNA))	94													COVID19 (COVID19 (PFIZER-BIONTECH))	94													HEP B (RECOMBIVAX HB)	94
COVID19 (COVID19 (JANSSEN))	95													COVID19 (COVID19 (MODERNA))	95													COVID19 (COVID19 (PFIZER-BIONTECH))	95													HEP B (RECOMBIVAX HB)	95
COVID19 (COVID19 (JANSSEN))	96													COVID19 (COVID19 (MODERNA))	96													COVID19 (COVID19 (PFIZER-BIONTECH))	96													HEP B (RECOMBIVAX HB)	96
COVID19 (COVID19 (JANSSEN))	97													COVID19 (COVID19 (MODERNA))	97													COVID19 (COVID19 (PFIZER-BIONTECH))	97													HEP B (RECOMBIVAX HB)	97
COVID19 (COVID19 (JANSSEN))	98													COVID19 (COVID19 (MODERNA))	98													COVID19 (COVID19 (PFIZER-BIONTECH))	98													HEP B (RECOMBIVAX HB)	98
COVID19 (COVID19 (JANSSEN))	99													COVID19 (COVID19 (MODERNA))	99													COVID19 (COVID19 (PFIZER-BIONTECH))	99													HEP B (RECOMBIVAX HB)	99
COVID19 (COVID19 (JANSSEN))	100													COVID19 (COVID19 (MODERNA))	100													COVID19 (COVID19 (PFIZER-BIONTECH))	100													HEP B (RECOMBIVAX HB)	100
COVID19 (COVID19 (JANSSEN))	101													COVID19 (COVID19 (MODERNA))	101													COVID19 (COVID19 (PFIZER-BIONTECH))	101													HEP B (RECOMBIVAX HB)	101
COVID19 (COVID19 (JANSSEN))	102													COVID19 (COVID19 (MODERNA))	102													COVID19 (COVID19 (PFIZER-BIONTECH))	102													HEP B (RECOMBIVAX HB)	102
COVID19 (COVID19 (JANSSEN))	103													COVID19 (COVID19 (MODERNA))	103													COVID19 (COVID19 (PFIZER-BIONTECH))	103													HEP B (RECOMBIVAX HB)	103
COVID19 (COVID19 (JANSSEN))	104													COVID19 (COVID19 (MODERNA))	104													COVID19 (COVID19 (PFIZER-BIONTECH))	104													HEP B (RECOMBIVAX HB)	104
COVID19 (COVID19 (JANSSEN))	105													COVID19 (COVID19 (MODERNA))	105													COVID19 (COVID19 (PFIZER-BIONTECH))	105													HEP B (RECOMBIVAX HB)	105
COVID19 (COVID19 (JANSSEN))	106													COVID19 (COVID19 (MODERNA))	106													COVID19 (COVID19 (PFIZER-BIONTECH))	106													HEP B (RECOMBIVAX HB)	106
COVID19 (COVID19 (JANSSEN))	107													COVID19 (COVID19 (MODERNA))	107													COVID19 (COVID19 (PFIZER-BIONTECH))	107													HEP B (RECOMBIVAX HB)	107
COVID19 (COVID19 (JANSSEN))	108													COVID19 (COVID19 (MODERNA))	108													COVID19 (COVID19 (PFIZER-BIONTECH))	108													HEP B (RECOMBIVAX HB)	108
COVID19 (COVID19 (JANSSEN))	109													COVID19 (COVID19 (MODERNA))	109													COVID19 (COVID19 (PFIZER-BIONTECH))	109													HEP B (RECOMBIVAX HB)	109
COVID19 (COVID19 (JANSSEN))	110													COVID19 (COVID19 (MODERNA))	110													COVID19 (COVID19 (PFIZER-BIONTECH))	110													HEP B (RECOMBIVAX HB)	110
COVID19 (COVID19 (JANSSEN))	111													COVID19 (COVID19 (MODERNA))	111													COVID19 (COVID19 (PFIZER-BIONTECH))	111													HEP B (RECOMBIVAX HB)	111
COVID19 (COVID19 (JANSSEN))	112													COVID19 (COVID19 (MODERNA))	112													COVID19 (COVID19 (PFIZER-BIONTECH))	112													HEP B (RECOMBIVAX HB)	112
COVID19 (COVID19 (JANSSEN))	113													COVID19 (COVID19 (MODERNA))	113													COVID19 (COVID19 (PFIZER-BIONTECH))	113													HEP B (RECOMBIVAX HB)	113
COVID19 (COVID19 (JANSSEN))	114													COVID19 (COVID19 (MODERNA))	114													COVID19 (COVID19 (PFIZER-BIONTECH))	114													HEP B (RECOMBIVAX HB)	114
COVID19 (COVID19 (JANSSEN))	115													COVID19 (COVID19 (MODERNA))	115													COVID19 (COVID19 (PFIZER-BIONTECH))	115													HEP B (RECOMBIVAX HB)	115
COVID19 (COVID19 (JANSSEN))	116													COVID19 (COVID19 (MODERNA))	116													COVID19 (COVID19 (PFIZER-BIONTECH))	116													HEP B (RECOMBIVAX HB)	116
COVID19 (COVID19 (JANSSEN))	117													COVID19 (COVID19 (MODERNA))	117													COVID19 (COVID19 (PFIZER-BIONTECH))	117													HEP B (RECOMBIVAX HB)	117
COVID19 (COVID19 (JANSSEN))	118													COVID19 (COVID19 (MODERNA))	118													COVID19 (COVID19 (PFIZER-BIONTECH))	118													HEP B (RECOMBIVAX HB)	118
COVID19 (COVID19 (JANSSEN))	119													COVID19 (COVID19 (MODERNA))	119													COVID19 (COVID19 (PFIZER-BIONTECH))	119													HEP B (RECOMBIVAX HB)	119
COVID19 (COVID19 (JANSSEN))	120													COVID19 (COVID19 (MODERNA))	120													COVID19 (COVID19 (PFIZER-BIONTECH))	120													HEP B (RECOMBIVAX HB)	120
Onset report
COVID19 (COVID19 (JANSSEN))	Onset	All	1	2	3	All Male	1 Male	2 Male	3 Male	All Female	1 Female	2 Female	3 Female	COVID19 (COVID19 (MODERNA))	Onset	All	1	2	3	All Male	1 Male	2 Male	3 Male	All Female	1 Female	2 Female	3 Female	COVID19 (COVID19 (PFIZER-BIONTECH))	Onset	All	1	2	3	All Male	1 Male	2 Male	3 Male	All Female	1 Female	2 Female	3 Female	HEP B (RECOMBIVAX HB)	Onset	All	1	2	3	All Male	1 Male
COVID19 (COVID19 (JANSSEN))	0	3	1							3	1			COVID19 (COVID19 (MODERNA))	0	9	3	5						9	3	5		COVID19 (COVID19 (PFIZER-BIONTECH))	0	103	56	42						103	56	42		HEP B (RECOMBIVAX HB)	0	1
COVID19 (COVID19 (JANSSEN))	1													COVID19 (COVID19 (MODERNA))	1	4	1	2						4	1	2		COVID19 (COVID19 (PFIZER-BIONTECH))	1	19	12	5						19	12	5		HEP B (RECOMBIVAX HB)	1
COVID19 (COVID19 (JANSSEN))	2													COVID19 (COVID19 (MODERNA))	2	6	1	1						6	1	1		COVID19 (COVID19 (PFIZER-BIONTECH))	2	15	6	7						15	6	7		HEP B (RECOMBIVAX HB)	2
COVID19 (COVID19 (JANSSEN))	3	1	1							1	1			COVID19 (COVID19 (MODERNA))	3	2	1	1						2	1	1		COVID19 (COVID19 (PFIZER-BIONTECH))	3	13	8	1						13	8	1		HEP B (RECOMBIVAX HB)	3
COVID19 (COVID19 (JANSSEN))	4													COVID19 (COVID19 (MODERNA))	4													COVID19 (COVID19 (PFIZER-BIONTECH))	4	6	4	2						6	4	2		HEP B (RECOMBIVAX HB)	4
COVID19 (COVID19 (JANSSEN))	5													COVID19 (COVID19 (MODERNA))	5	5	2	3						5	2	3		COVID19 (COVID19 (PFIZER-BIONTECH))	5	8	5	2						8	5	2		HEP B (RECOMBIVAX HB)	5
COVID19 (COVID19 (JANSSEN))	6													COVID19 (COVID19 (MODERNA))	6													COVID19 (COVID19 (PFIZER-BIONTECH))	6	10	8	2						10	8	2		HEP B (RECOMBIVAX HB)	6
COVID19 (COVID19 (JANSSEN))	7	1								1				COVID19 (COVID19 (MODERNA))	7	3	2	1						3	2	1		COVID19 (COVID19 (PFIZER-BIONTECH))	7	3	3							3	3			HEP B (RECOMBIVAX HB)	7
COVID19 (COVID19 (JANSSEN))	8													COVID19 (COVID19 (MODERNA))	8	1								1				COVID19 (COVID19 (PFIZER-BIONTECH))	8	2	2							2	2			HEP B (RECOMBIVAX HB)	8
COVID19 (COVID19 (JANSSEN))	9													COVID19 (COVID19 (MODERNA))	9													COVID19 (COVID19 (PFIZER-BIONTECH))	9	1	1							1	1			HEP B (RECOMBIVAX HB)	9
COVID19 (COVID19 (JANSSEN))	10													COVID19 (COVID19 (MODERNA))	10													COVID19 (COVID19 (PFIZER-BIONTECH))	10	5	3	2						5	3	2		HEP B (RECOMBIVAX HB)	10
COVID19 (COVID19 (JANSSEN))	11													COVID19 (COVID19 (MODERNA))	11													COVID19 (COVID19 (PFIZER-BIONTECH))	11	3	1	2						3	1	2		HEP B (RECOMBIVAX HB)	11
COVID19 (COVID19 (JANSSEN))	12													COVID19 (COVID19 (MODERNA))	12	1		1						1		1		COVID19 (COVID19 (PFIZER-BIONTECH))	12	2	1	1						2	1	1		HEP B (RECOMBIVAX HB)	12
COVID19 (COVID19 (JANSSEN))	13													COVID19 (COVID19 (MODERNA))	13	4	3	1						4	3	1		COVID19 (COVID19 (PFIZER-BIONTECH))	13	5	3	1						5	3	1		HEP B (RECOMBIVAX HB)	13
COVID19 (COVID19 (JANSSEN))	14													COVID19 (COVID19 (MODERNA))	14	2	1	1						2	1	1		COVID19 (COVID19 (PFIZER-BIONTECH))	14	3	3							3	3			HEP B (RECOMBIVAX HB)	14
COVID19 (COVID19 (JANSSEN))	15													COVID19 (COVID19 (MODERNA))	15	1	1							1	1			COVID19 (COVID19 (PFIZER-BIONTECH))	15	5	2	1						5	2	1		HEP B (RECOMBIVAX HB)	15
COVID19 (COVID19 (JANSSEN))	16													COVID19 (COVID19 (MODERNA))	16	2	1	1						2	1	1		COVID19 (COVID19 (PFIZER-BIONTECH))	16	1	1							1	1			HEP B (RECOMBIVAX HB)	16
COVID19 (COVID19 (JANSSEN))	17	1	1							1	1			COVID19 (COVID19 (MODERNA))	17	1		1						1		1		COVID19 (COVID19 (PFIZER-BIONTECH))	17	2		2						2		2		HEP B (RECOMBIVAX HB)	17
COVID19 (COVID19 (JANSSEN))	18													COVID19 (COVID19 (MODERNA))	18	2	1							2	1			COVID19 (COVID19 (PFIZER-BIONTECH))	18	1	1							1	1			HEP B (RECOMBIVAX HB)	18
COVID19 (COVID19 (JANSSEN))	19													COVID19 (COVID19 (MODERNA))	19													COVID19 (COVID19 (PFIZER-BIONTECH))	19	3	1	2						3	1	2		HEP B (RECOMBIVAX HB)	19
COVID19 (COVID19 (JANSSEN))	20													COVID19 (COVID19 (MODERNA))	20													COVID19 (COVID19 (PFIZER-BIONTECH))	20	1		1						1		1		HEP B (RECOMBIVAX HB)	20
COVID19 (COVID19 (JANSSEN))	21													COVID19 (COVID19 (MODERNA))	21													COVID19 (COVID19 (PFIZER-BIONTECH))	21	3	2	1						3	2	1		HEP B (RECOMBIVAX HB)	21
COVID19 (COVID19 (JANSSEN))	22													COVID19 (COVID19 (MODERNA))	22	2		2						2		2		COVID19 (COVID19 (PFIZER-BIONTECH))	22	3	1	2						3	1	2		HEP B (RECOMBIVAX HB)	22
COVID19 (COVID19 (JANSSEN))	23													COVID19 (COVID19 (MODERNA))	23	2	1	1						2	1	1		COVID19 (COVID19 (PFIZER-BIONTECH))	23	3	1	2						3	1	2		HEP B (RECOMBIVAX HB)	23
COVID19 (COVID19 (JANSSEN))	24													COVID19 (COVID19 (MODERNA))	24													COVID19 (COVID19 (PFIZER-BIONTECH))	24													HEP B (RECOMBIVAX HB)	24
COVID19 (COVID19 (JANSSEN))	25													COVID19 (COVID19 (MODERNA))	25													COVID19 (COVID19 (PFIZER-BIONTECH))	25	3	2	1						3	2	1		HEP B (RECOMBIVAX HB)	25
COVID19 (COVID19 (JANSSEN))	26													COVID19 (COVID19 (MODERNA))	26													COVID19 (COVID19 (PFIZER-BIONTECH))	26	2	1	1						2	1	1		HEP B (RECOMBIVAX HB)	26
COVID19 (COVID19 (JANSSEN))	27	1	1							1	1			COVID19 (COVID19 (MODERNA))	27	1	1							1	1			COVID19 (COVID19 (PFIZER-BIONTECH))	27													HEP B (RECOMBIVAX HB)	27
COVID19 (COVID19 (JANSSEN))	28													COVID19 (COVID19 (MODERNA))	28													COVID19 (COVID19 (PFIZER-BIONTECH))	28	3	2	1						3	2	1		HEP B (RECOMBIVAX HB)	28
COVID19 (COVID19 (JANSSEN))	29													COVID19 (COVID19 (MODERNA))	29													COVID19 (COVID19 (PFIZER-BIONTECH))	29	1	1							1	1			HEP B (RECOMBIVAX HB)	29
COVID19 (COVID19 (JANSSEN))	30													COVID19 (COVID19 (MODERNA))	30	1	1							1	1			COVID19 (COVID19 (PFIZER-BIONTECH))	30													HEP B (RECOMBIVAX HB)	30
COVID19 (COVID19 (JANSSEN))	31													COVID19 (COVID19 (MODERNA))	31	1		1						1		1		COVID19 (COVID19 (PFIZER-BIONTECH))	31	2		1						2		1		HEP B (RECOMBIVAX HB)	31
COVID19 (COVID19 (JANSSEN))	32													COVID19 (COVID19 (MODERNA))	32													COVID19 (COVID19 (PFIZER-BIONTECH))	32													HEP B (RECOMBIVAX HB)	32
COVID19 (COVID19 (JANSSEN))	33													COVID19 (COVID19 (MODERNA))	33													COVID19 (COVID19 (PFIZER-BIONTECH))	33													HEP B (RECOMBIVAX HB)	33
COVID19 (COVID19 (JANSSEN))	34													COVID19 (COVID19 (MODERNA))	34													COVID19 (COVID19 (PFIZER-BIONTECH))	34													HEP B (RECOMBIVAX HB)	34
COVID19 (COVID19 (JANSSEN))	35													COVID19 (COVID19 (MODERNA))	35													COVID19 (COVID19 (PFIZER-BIONTECH))	35	2	2							2	2			HEP B (RECOMBIVAX HB)	35
COVID19 (COVID19 (JANSSEN))	36													COVID19 (COVID19 (MODERNA))	36	1	1							1	1			COVID19 (COVID19 (PFIZER-BIONTECH))	36	1	1							1	1			HEP B (RECOMBIVAX HB)	36
COVID19 (COVID19 (JANSSEN))	37													COVID19 (COVID19 (MODERNA))	37													COVID19 (COVID19 (PFIZER-BIONTECH))	37	3		2						3		2		HEP B (RECOMBIVAX HB)	37
COVID19 (COVID19 (JANSSEN))	38													COVID19 (COVID19 (MODERNA))	38													COVID19 (COVID19 (PFIZER-BIONTECH))	38													HEP B (RECOMBIVAX HB)	38
COVID19 (COVID19 (JANSSEN))	39													COVID19 (COVID19 (MODERNA))	39													COVID19 (COVID19 (PFIZER-BIONTECH))	39													HEP B (RECOMBIVAX HB)	39
COVID19 (COVID19 (JANSSEN))	40													COVID19 (COVID19 (MODERNA))	40	1	1							1	1			COVID19 (COVID19 (PFIZER-BIONTECH))	40	1		1						1		1		HEP B (RECOMBIVAX HB)	40
COVID19 (COVID19 (JANSSEN))	41													COVID19 (COVID19 (MODERNA))	41													COVID19 (COVID19 (PFIZER-BIONTECH))	41	2		1						2		1		HEP B (RECOMBIVAX HB)	41
COVID19 (COVID19 (JANSSEN))	42													COVID19 (COVID19 (MODERNA))	42													COVID19 (COVID19 (PFIZER-BIONTECH))	42	1		1						1		1		HEP B (RECOMBIVAX HB)	42
COVID19 (COVID19 (JANSSEN))	43													COVID19 (COVID19 (MODERNA))	43													COVID19 (COVID19 (PFIZER-BIONTECH))	43	1	1							1	1			HEP B (RECOMBIVAX HB)	43
COVID19 (COVID19 (JANSSEN))	44													COVID19 (COVID19 (MODERNA))	44													COVID19 (COVID19 (PFIZER-BIONTECH))	44													HEP B (RECOMBIVAX HB)	44
COVID19 (COVID19 (JANSSEN))	45													COVID19 (COVID19 (MODERNA))	45													COVID19 (COVID19 (PFIZER-BIONTECH))	45													HEP B (RECOMBIVAX HB)	45
COVID19 (COVID19 (JANSSEN))	46													COVID19 (COVID19 (MODERNA))	46	1								1				COVID19 (COVID19 (PFIZER-BIONTECH))	46													HEP B (RECOMBIVAX HB)	46
COVID19 (COVID19 (JANSSEN))	47													COVID19 (COVID19 (MODERNA))	47													COVID19 (COVID19 (PFIZER-BIONTECH))	47													HEP B (RECOMBIVAX HB)	47
COVID19 (COVID19 (JANSSEN))	48													COVID19 (COVID19 (MODERNA))	48													COVID19 (COVID19 (PFIZER-BIONTECH))	48													HEP B (RECOMBIVAX HB)	48
COVID19 (COVID19 (JANSSEN))	49													COVID19 (COVID19 (MODERNA))	49													COVID19 (COVID19 (PFIZER-BIONTECH))	49													HEP B (RECOMBIVAX HB)	49
COVID19 (COVID19 (JANSSEN))	50													COVID19 (COVID19 (MODERNA))	50													COVID19 (COVID19 (PFIZER-BIONTECH))	50													HEP B (RECOMBIVAX HB)	50
COVID19 (COVID19 (JANSSEN))	51													COVID19 (COVID19 (MODERNA))	51													COVID19 (COVID19 (PFIZER-BIONTECH))	51													HEP B (RECOMBIVAX HB)	51
COVID19 (COVID19 (JANSSEN))	52													COVID19 (COVID19 (MODERNA))	52													COVID19 (COVID19 (PFIZER-BIONTECH))	52													HEP B (RECOMBIVAX HB)	52
COVID19 (COVID19 (JANSSEN))	53													COVID19 (COVID19 (MODERNA))	53	2	1	1						2	1	1		COVID19 (COVID19 (PFIZER-BIONTECH))	53													HEP B (RECOMBIVAX HB)	53
COVID19 (COVID19 (JANSSEN))	54													COVID19 (COVID19 (MODERNA))	54													COVID19 (COVID19 (PFIZER-BIONTECH))	54													HEP B (RECOMBIVAX HB)	54
COVID19 (COVID19 (JANSSEN))	55													COVID19 (COVID19 (MODERNA))	55													COVID19 (COVID19 (PFIZER-BIONTECH))	55													HEP B (RECOMBIVAX HB)	55
COVID19 (COVID19 (JANSSEN))	56													COVID19 (COVID19 (MODERNA))	56													COVID19 (COVID19 (PFIZER-BIONTECH))	56													HEP B (RECOMBIVAX HB)	56
COVID19 (COVID19 (JANSSEN))	57													COVID19 (COVID19 (MODERNA))	57													COVID19 (COVID19 (PFIZER-BIONTECH))	57													HEP B (RECOMBIVAX HB)	57
COVID19 (COVID19 (JANSSEN))	58													COVID19 (COVID19 (MODERNA))	58													COVID19 (COVID19 (PFIZER-BIONTECH))	58													HEP B (RECOMBIVAX HB)	58
COVID19 (COVID19 (JANSSEN))	59													COVID19 (COVID19 (MODERNA))	59													COVID19 (COVID19 (PFIZER-BIONTECH))	59													HEP B (RECOMBIVAX HB)	59
COVID19 (COVID19 (JANSSEN))	60													COVID19 (COVID19 (MODERNA))	60													COVID19 (COVID19 (PFIZER-BIONTECH))	60													HEP B (RECOMBIVAX HB)	60
COVID19 (COVID19 (JANSSEN))	61													COVID19 (COVID19 (MODERNA))	61													COVID19 (COVID19 (PFIZER-BIONTECH))	61	3	3							3	3			HEP B (RECOMBIVAX HB)	61
COVID19 (COVID19 (JANSSEN))	62													COVID19 (COVID19 (MODERNA))	62													COVID19 (COVID19 (PFIZER-BIONTECH))	62													HEP B (RECOMBIVAX HB)	62
COVID19 (COVID19 (JANSSEN))	63													COVID19 (COVID19 (MODERNA))	63													COVID19 (COVID19 (PFIZER-BIONTECH))	63	1		1						1		1		HEP B (RECOMBIVAX HB)	63
COVID19 (COVID19 (JANSSEN))	64													COVID19 (COVID19 (MODERNA))	64													COVID19 (COVID19 (PFIZER-BIONTECH))	64													HEP B (RECOMBIVAX HB)	64
COVID19 (COVID19 (JANSSEN))	65													COVID19 (COVID19 (MODERNA))	65													COVID19 (COVID19 (PFIZER-BIONTECH))	65													HEP B (RECOMBIVAX HB)	65
COVID19 (COVID19 (JANSSEN))	66													COVID19 (COVID19 (MODERNA))	66													COVID19 (COVID19 (PFIZER-BIONTECH))	66													HEP B (RECOMBIVAX HB)	66
COVID19 (COVID19 (JANSSEN))	67													COVID19 (COVID19 (MODERNA))	67													COVID19 (COVID19 (PFIZER-BIONTECH))	67													HEP B (RECOMBIVAX HB)	67
COVID19 (COVID19 (JANSSEN))	68													COVID19 (COVID19 (MODERNA))	68													COVID19 (COVID19 (PFIZER-BIONTECH))	68	1		1						1		1		HEP B (RECOMBIVAX HB)	68
COVID19 (COVID19 (JANSSEN))	69													COVID19 (COVID19 (MODERNA))	69													COVID19 (COVID19 (PFIZER-BIONTECH))	69													HEP B (RECOMBIVAX HB)	69
COVID19 (COVID19 (JANSSEN))	70													COVID19 (COVID19 (MODERNA))	70													COVID19 (COVID19 (PFIZER-BIONTECH))	70													HEP B (RECOMBIVAX HB)	70
COVID19 (COVID19 (JANSSEN))	71													COVID19 (COVID19 (MODERNA))	71													COVID19 (COVID19 (PFIZER-BIONTECH))	71													HEP B (RECOMBIVAX HB)	71
COVID19 (COVID19 (JANSSEN))	72													COVID19 (COVID19 (MODERNA))	72													COVID19 (COVID19 (PFIZER-BIONTECH))	72													HEP B (RECOMBIVAX HB)	72
COVID19 (COVID19 (JANSSEN))	73													COVID19 (COVID19 (MODERNA))	73													COVID19 (COVID19 (PFIZER-BIONTECH))	73													HEP B (RECOMBIVAX HB)	73
COVID19 (COVID19 (JANSSEN))	74													COVID19 (COVID19 (MODERNA))	74													COVID19 (COVID19 (PFIZER-BIONTECH))	74													HEP B (RECOMBIVAX HB)	74
COVID19 (COVID19 (JANSSEN))	75													COVID19 (COVID19 (MODERNA))	75													COVID19 (COVID19 (PFIZER-BIONTECH))	75	1		1						1		1		HEP B (RECOMBIVAX HB)	75
COVID19 (COVID19 (JANSSEN))	76													COVID19 (COVID19 (MODERNA))	76													COVID19 (COVID19 (PFIZER-BIONTECH))	76													HEP B (RECOMBIVAX HB)	76
COVID19 (COVID19 (JANSSEN))	77													COVID19 (COVID19 (MODERNA))	77													COVID19 (COVID19 (PFIZER-BIONTECH))	77													HEP B (RECOMBIVAX HB)	77
COVID19 (COVID19 (JANSSEN))	78													COVID19 (COVID19 (MODERNA))	78													COVID19 (COVID19 (PFIZER-BIONTECH))	78													HEP B (RECOMBIVAX HB)	78
COVID19 (COVID19 (JANSSEN))	79													COVID19 (COVID19 (MODERNA))	79													COVID19 (COVID19 (PFIZER-BIONTECH))	79													HEP B (RECOMBIVAX HB)	79
COVID19 (COVID19 (JANSSEN))	80													COVID19 (COVID19 (MODERNA))	80													COVID19 (COVID19 (PFIZER-BIONTECH))	80													HEP B (RECOMBIVAX HB)	80
COVID19 (COVID19 (JANSSEN))	81													COVID19 (COVID19 (MODERNA))	81													COVID19 (COVID19 (PFIZER-BIONTECH))	81													HEP B (RECOMBIVAX HB)	81
COVID19 (COVID19 (JANSSEN))	82													COVID19 (COVID19 (MODERNA))	82													COVID19 (COVID19 (PFIZER-BIONTECH))	82													HEP B (RECOMBIVAX HB)	82
COVID19 (COVID19 (JANSSEN))	83													COVID19 (COVID19 (MODERNA))	83													COVID19 (COVID19 (PFIZER-BIONTECH))	83													HEP B (RECOMBIVAX HB)	83
COVID19 (COVID19 (JANSSEN))	84													COVID19 (COVID19 (MODERNA))	84													COVID19 (COVID19 (PFIZER-BIONTECH))	84	2	1	1						2	1	1		HEP B (RECOMBIVAX HB)	84
COVID19 (COVID19 (JANSSEN))	85													COVID19 (COVID19 (MODERNA))	85													COVID19 (COVID19 (PFIZER-BIONTECH))	85													HEP B (RECOMBIVAX HB)	85
COVID19 (COVID19 (JANSSEN))	86													COVID19 (COVID19 (MODERNA))	86													COVID19 (COVID19 (PFIZER-BIONTECH))	86													HEP B (RECOMBIVAX HB)	86
COVID19 (COVID19 (JANSSEN))	87													COVID19 (COVID19 (MODERNA))	87													COVID19 (COVID19 (PFIZER-BIONTECH))	87													HEP B (RECOMBIVAX HB)	87
COVID19 (COVID19 (JANSSEN))	88													COVID19 (COVID19 (MODERNA))	88													COVID19 (COVID19 (PFIZER-BIONTECH))	88													HEP B (RECOMBIVAX HB)	88
COVID19 (COVID19 (JANSSEN))	89													COVID19 (COVID19 (MODERNA))	89													COVID19 (COVID19 (PFIZER-BIONTECH))	89													HEP B (RECOMBIVAX HB)	89
COVID19 (COVID19 (JANSSEN))	90													COVID19 (COVID19 (MODERNA))	90													COVID19 (COVID19 (PFIZER-BIONTECH))	90													HEP B (RECOMBIVAX HB)	90
COVID19 (COVID19 (JANSSEN))	91													COVID19 (COVID19 (MODERNA))	91													COVID19 (COVID19 (PFIZER-BIONTECH))	91													HEP B (RECOMBIVAX HB)	91
COVID19 (COVID19 (JANSSEN))	92													COVID19 (COVID19 (MODERNA))	92													COVID19 (COVID19 (PFIZER-BIONTECH))	92													HEP B (RECOMBIVAX HB)	92
COVID19 (COVID19 (JANSSEN))	93													COVID19 (COVID19 (MODERNA))	93	1	1							1	1			COVID19 (COVID19 (PFIZER-BIONTECH))	93													HEP B (RECOMBIVAX HB)	93
COVID19 (COVID19 (JANSSEN))	94													COVID19 (COVID19 (MODERNA))	94													COVID19 (COVID19 (PFIZER-BIONTECH))	94													HEP B (RECOMBIVAX HB)	94
COVID19 (COVID19 (JANSSEN))	95													COVID19 (COVID19 (MODERNA))	95													COVID19 (COVID19 (PFIZER-BIONTECH))	95													HEP B (RECOMBIVAX HB)	95
COVID19 (COVID19 (JANSSEN))	96													COVID19 (COVID19 (MODERNA))	96													COVID19 (COVID19 (PFIZER-BIONTECH))	96													HEP B (RECOMBIVAX HB)	96
COVID19 (COVID19 (JANSSEN))	97													COVID19 (COVID19 (MODERNA))	97													COVID19 (COVID19 (PFIZER-BIONTECH))	97													HEP B (RECOMBIVAX HB)	97
COVID19 (COVID19 (JANSSEN))	98													COVID19 (COVID19 (MODERNA))	98													COVID19 (COVID19 (PFIZER-BIONTECH))	98													HEP B (RECOMBIVAX HB)	98
COVID19 (COVID19 (JANSSEN))	99													COVID19 (COVID19 (MODERNA))	99													COVID19 (COVID19 (PFIZER-BIONTECH))	99													HEP B (RECOMBIVAX HB)	99
COVID19 (COVID19 (JANSSEN))	100													COVID19 (COVID19 (MODERNA))	100													COVID19 (COVID19 (PFIZER-BIONTECH))	100													HEP B (RECOMBIVAX HB)	100
COVID19 (COVID19 (JANSSEN))	101													COVID19 (COVID19 (MODERNA))	101													COVID19 (COVID19 (PFIZER-BIONTECH))	101													HEP B (RECOMBIVAX HB)	101
COVID19 (COVID19 (JANSSEN))	102													COVID19 (COVID19 (MODERNA))	102													COVID19 (COVID19 (PFIZER-BIONTECH))	102	1	1							1	1			HEP B (RECOMBIVAX HB)	102
COVID19 (COVID19 (JANSSEN))	103													COVID19 (COVID19 (MODERNA))	103													COVID19 (COVID19 (PFIZER-BIONTECH))	103													HEP B (RECOMBIVAX HB)	103
COVID19 (COVID19 (JANSSEN))	104													COVID19 (COVID19 (MODERNA))	104													COVID19 (COVID19 (PFIZER-BIONTECH))	104													HEP B (RECOMBIVAX HB)	104
COVID19 (COVID19 (JANSSEN))	105													COVID19 (COVID19 (MODERNA))	105													COVID19 (COVID19 (PFIZER-BIONTECH))	105													HEP B (RECOMBIVAX HB)	105
COVID19 (COVID19 (JANSSEN))	106													COVID19 (COVID19 (MODERNA))	106													COVID19 (COVID19 (PFIZER-BIONTECH))	106													HEP B (RECOMBIVAX HB)	106
COVID19 (COVID19 (JANSSEN))	107													COVID19 (COVID19 (MODERNA))	107													COVID19 (COVID19 (PFIZER-BIONTECH))	107													HEP B (RECOMBIVAX HB)	107
COVID19 (COVID19 (JANSSEN))	108													COVID19 (COVID19 (MODERNA))	108													COVID19 (COVID19 (PFIZER-BIONTECH))	108													HEP B (RECOMBIVAX HB)	108
COVID19 (COVID19 (JANSSEN))	109													COVID19 (COVID19 (MODERNA))	109													COVID19 (COVID19 (PFIZER-BIONTECH))	109													HEP B (RECOMBIVAX HB)	109
COVID19 (COVID19 (JANSSEN))	110													COVID19 (COVID19 (MODERNA))	110													COVID19 (COVID19 (PFIZER-BIONTECH))	110													HEP B (RECOMBIVAX HB)	110
COVID19 (COVID19 (JANSSEN))	111													COVID19 (COVID19 (MODERNA))	111													COVID19 (COVID19 (PFIZER-BIONTECH))	111													HEP B (RECOMBIVAX HB)	111
COVID19 (COVID19 (JANSSEN))	112													COVID19 (COVID19 (MODERNA))	112													COVID19 (COVID19 (PFIZER-BIONTECH))	112													HEP B (RECOMBIVAX HB)	112
COVID19 (COVID19 (JANSSEN))	113													COVID19 (COVID19 (MODERNA))	113													COVID19 (COVID19 (PFIZER-BIONTECH))	113													HEP B (RECOMBIVAX HB)	113
COVID19 (COVID19 (JANSSEN))	114													COVID19 (COVID19 (MODERNA))	114													COVID19 (COVID19 (PFIZER-BIONTECH))	114													HEP B (RECOMBIVAX HB)	114
COVID19 (COVID19 (JANSSEN))	115													COVID19 (COVID19 (MODERNA))	115													COVID19 (COVID19 (PFIZER-BIONTECH))	115													HEP B (RECOMBIVAX HB)	115
COVID19 (COVID19 (JANSSEN))	116													COVID19 (COVID19 (MODERNA))	116													COVID19 (COVID19 (PFIZER-BIONTECH))	116													HEP B (RECOMBIVAX HB)	116
COVID19 (COVID19 (JANSSEN))	117													COVID19 (COVID19 (MODERNA))	117													COVID19 (COVID19 (PFIZER-BIONTECH))	117													HEP B (RECOMBIVAX HB)	117
COVID19 (COVID19 (JANSSEN))	118													COVID19 (COVID19 (MODERNA))	118													COVID19 (COVID19 (PFIZER-BIONTECH))	118													HEP B (RECOMBIVAX HB)	118
COVID19 (COVID19 (JANSSEN))	119													COVID19 (COVID19 (MODERNA))	119													COVID19 (COVID19 (PFIZER-BIONTECH))	119													HEP B (RECOMBIVAX HB)	119
COVID19 (COVID19 (JANSSEN))	120													COVID19 (COVID19 (MODERNA))	120													COVID19 (COVID19 (PFIZER-BIONTECH))	120													HEP B (RECOMBIVAX HB)	120
[truncated: 76 more columns]
